# Supplementary material for: Exploiting the mediating role of the metabolome to unravel transcript-to-phenotype associations
Source: eLife. 2023 Mar 9;12:e81097. doi: 10.7554/eLife.81097 (PMC9998083; doi:10.7554/eLife.81097)
Supplement: Figure 1—figure supplement 1—source data 1. — Number of IVs used by the univariable MR aiming at identifying transcript-to-metabolite, metabolite-to-phenotype, and transcript-to-phenotype causal relations. This file relates to Figure 1—figure supplement 1. [file elife-81097-fig1-figsupp1-data1.xlsx]

## Sheet: Sheet1
MR	IVs	Count
transcript-to-metabolite	3	529674
transcript-to-metabolite	4	367453
transcript-to-metabolite	5	261410
transcript-to-metabolite	6	189783
transcript-to-metabolite	7	138083
transcript-to-metabolite	8	111384
transcript-to-metabolite	9	89759
transcript-to-metabolite	10	62643
transcript-to-metabolite	11	45585
transcript-to-metabolite	12	34755
transcript-to-metabolite	13	26668
transcript-to-metabolite	14	17087
transcript-to-metabolite	15	10827
transcript-to-metabolite	16	8939
transcript-to-metabolite	17	2963
transcript-to-metabolite	18	4763
transcript-to-metabolite	19	2119
transcript-to-metabolite	20	1683
transcript-to-metabolite	21	1392
transcript-to-metabolite	22	247
transcript-to-metabolite	23	234
transcript-to-metabolite	24	239
metabolite-to-phenotype	3	627
metabolite-to-phenotype	4	352
metabolite-to-phenotype	5	164
metabolite-to-phenotype	6	50
metabolite-to-phenotype	7	21
metabolite-to-phenotype	8	13
metabolite-to-phenotype	9	17
metabolite-to-phenotype	10	8
metabolite-to-phenotype	11	4
metabolite-to-phenotype	12	4
metabolite-to-phenotype	13	0
metabolite-to-phenotype	14	1
metabolite-to-phenotype	15	1
metabolite-to-phenotype	16	2
metabolite-to-phenotype	17	3
metabolite-to-phenotype	18	10
metabolite-to-phenotype	19	16
metabolite-to-phenotype	20	1
metabolite-to-phenotype	21	5
metabolite-to-phenotype	22	7
metabolite-to-phenotype	23	7
metabolite-to-phenotype	24	4
metabolite-to-phenotype	25	4
metabolite-to-phenotype	26	9
metabolite-to-phenotype	27	14
transcript-to-phenotype	3	56179
transcript-to-phenotype	4	36549
transcript-to-phenotype	5	29389
transcript-to-phenotype	6	22727
transcript-to-phenotype	7	19217
transcript-to-phenotype	8	14740
transcript-to-phenotype	9	12490
transcript-to-phenotype	10	10704
transcript-to-phenotype	11	8427
transcript-to-phenotype	12	7592
transcript-to-phenotype	13	6538
transcript-to-phenotype	14	6459
transcript-to-phenotype	15	6021
transcript-to-phenotype	16	5177
transcript-to-phenotype	17	4655
transcript-to-phenotype	18	4388
transcript-to-phenotype	19	4378
transcript-to-phenotype	20	3490
transcript-to-phenotype	21	3539
transcript-to-phenotype	22	3018
transcript-to-phenotype	23	2868
transcript-to-phenotype	24	2525
transcript-to-phenotype	25	2181
transcript-to-phenotype	26	1912
transcript-to-phenotype	27	1805
transcript-to-phenotype	28	1633
transcript-to-phenotype	29	1321
transcript-to-phenotype	30	1138
transcript-to-phenotype	31	1114
transcript-to-phenotype	32	1133
transcript-to-phenotype	33	903
transcript-to-phenotype	34	1093
transcript-to-phenotype	35	846
transcript-to-phenotype	36	864
transcript-to-phenotype	37	587
transcript-to-phenotype	38	520
transcript-to-phenotype	39	630
transcript-to-phenotype	40	583
transcript-to-phenotype	41	408
transcript-to-phenotype	42	414
transcript-to-phenotype	43	359
transcript-to-phenotype	44	293
transcript-to-phenotype	45	248
transcript-to-phenotype	46	182
transcript-to-phenotype	47	98
transcript-to-phenotype	48	123
transcript-to-phenotype	49	238
transcript-to-phenotype	50	76
transcript-to-phenotype	51	114
transcript-to-phenotype	52	49
transcript-to-phenotype	53	77
transcript-to-phenotype	54	32
transcript-to-phenotype	55	3
transcript-to-phenotype	56	14
transcript-to-phenotype	57	27
transcript-to-phenotype	58	35
transcript-to-phenotype	59	6
transcript-to-phenotype	60	21
transcript-to-phenotype	61	20
