# Supplementary material for: Exploiting the mediating role of the metabolome to unravel transcript-to-phenotype associations
Source: eLife. 2023 Mar 9;12:e81097. doi: 10.7554/eLife.81097 (PMC9998083; doi:10.7554/eLife.81097)
Supplement: Figure 2—source data 1. — Total (αTP ; transcript-to-phenotype effect) and direct (αd ; direct_effect) effects for the 216 transcript-metabolite-trait causal triplets involving the listed transcript (Gene_ID), metabolite (Shin_ID), and complex phenotype. This file relates to Figure 2B. [file elife-81097-fig2-data1.xlsx]

## Sheet: Sheet1
Gene_ID	Shin_ID	Phenotype	transcript-to-phenotype effect	direct_effect
ENSG00000134222	M00063	bilirubin	-0.0099054	-0.00116
ENSG00000134222	M00063	diastolic_BP	-0.0019848	-0.00885
ENSG00000134222	M00063	height	0.021021	0.01466
ENSG00000154122	M01564	Ca	-0.01519	-0.01177
ENSG00000180992	M01564	Ca	0.041291	0.05805
ENSG00000176422	M02730	urea	0.052214	0.03839
ENSG00000112679	M02734	Cr	-0.068468	-0.07874
ENSG00000112679	M02734	glucose	-0.020926	-0.03659
ENSG00000111181	M03141	ALP	0.0048489	0.0112
ENSG00000111181	M03141	BMI	-0.0024268	-0.00264
ENSG00000111181	M03141	Cr	0.024421	0.02944
ENSG00000111181	M03141	GGT	0.010484	0.01041
ENSG00000111181	M03141	height	-0.044582	-0.02941
ENSG00000152409	M03141	ALP	-0.02664	-0.02684
ENSG00000152409	M03141	BMI	-0.013371	-0.00668
ENSG00000152409	M03141	Cr	-0.01716	0.00897
ENSG00000152409	M03141	GGT	-0.026004	-0.02631
ENSG00000152409	M03141	height	-0.0077861	-0.00325
ENSG00000018280	M15500	FVC	0.0019931	-0.01681
ENSG00000129295	M15500	FVC	-0.0023347	-0.00204
ENSG00000141279	M15500	FVC	0.046059	0.04606
ENSG00000146215	M15500	FVC	-0.039078	-0.03459
ENSG00000198933	M15500	FVC	0.016984	0.02912
ENSG00000228782	M15500	FVC	-0.026475	-0.02734
ENSG00000135631	M15630	AST	-0.0041589	-0.00431
ENSG00000135631	M15630	Cr	-0.0022043	-0.00522
ENSG00000135631	M15630	cystatinC	0.0050173	0.00516
ENSG00000135631	M15630	diastolic_BP	0.0090594	0.00893
ENSG00000135631	M15630	GGT	-0.013365	-0.0136
ENSG00000135631	M15630	urea	0.0099093	0.00992
ENSG00000204872	M15630	AST	0.014847	0.00706
ENSG00000204872	M15630	Cr	-0.048943	0.00646
ENSG00000204872	M15630	cystatinC	-0.030911	0.00727
ENSG00000204872	M15630	diastolic_BP	0.020266	0.00099
ENSG00000204872	M15630	GGT	0.013561	-0.00175
ENSG00000204872	M15630	urea	-0.018363	-0.03126
ENSG00000133678	M15676	ALT	-0.0056154	-0.00562
ENSG00000076003	M20675	albumin	0.016966	0.01826
ENSG00000076003	M20675	ALT	-0.0083282	-0.00626
ENSG00000076003	M20675	BMI	-0.022638	-0.01887
ENSG00000076003	M20675	diastolic_BP	-0.012961	-0.00781
ENSG00000076003	M20675	heart_rate	-0.021445	-0.01839
ENSG00000076003	M20675	phosphate	0.011352	0.00971
ENSG00000076003	M20675	systolic_BP	-0.007198	-0.00105
ENSG00000076003	M20675	urate	-0.02818	-0.02426
ENSG00000115866	M20675	albumin	0.005275	0.00442
ENSG00000115866	M20675	ALT	-0.0084325	-0.00748
ENSG00000115866	M20675	BMI	-0.010354	-0.00994
ENSG00000115866	M20675	diastolic_BP	-0.017428	-0.01704
ENSG00000115866	M20675	heart_rate	-0.01637	-0.01618
ENSG00000115866	M20675	phosphate	0.0053253	0.00222
ENSG00000115866	M20675	systolic_BP	-0.012378	-0.01117
ENSG00000115866	M20675	urate	-0.0181	-0.01641
ENSG00000226806	M20675	albumin	0.0062285	0.0061
ENSG00000226806	M20675	ALT	-0.0085168	-0.00855
ENSG00000226806	M20675	BMI	-0.014263	-0.01244
ENSG00000226806	M20675	diastolic_BP	-0.0083275	-0.0081
ENSG00000226806	M20675	heart_rate	-0.0099913	-0.00985
ENSG00000226806	M20675	phosphate	0.0033081	0.00299
ENSG00000226806	M20675	systolic_BP	-0.0051033	-0.00481
ENSG00000226806	M20675	urate	-0.015195	-0.0135
ENSG00000158104	M22030	CRP	0.0064458	0.00852
ENSG00000158104	M22030	cystatinC	0.013995	0.00659
ENSG00000158104	M22030	urea	0.0065083	0.00335
ENSG00000146833	M31591	CRP	-0.0010911	-0.00266
ENSG00000146833	M31591	FVC	-0.0029697	-0.00294
ENSG00000146833	M31591	height	-0.0031746	-0.00277
ENSG00000146833	M31591	testosterone	0.015313	0.01295
ENSG00000146731	M32315	ApoA	-0.01182	-0.01182
ENSG00000146731	M32315	CRP	0.052785	0.02254
ENSG00000146731	M32315	cystatinC	0.0071658	0.00717
ENSG00000197208	M32328	Ca	-0.011544	-0.01073
ENSG00000135114	M32412	AST	0.0090184	0.01975
ENSG00000135114	M32412	CRP	-0.08454	-0.12359
ENSG00000135114	M32412	GGT	-0.19477	-0.10329
ENSG00000135114	M32412	phosphate	-0.0080202	0.01184
ENSG00000135114	M32412	total_protein	0.016465	0.00614
ENSG00000197208	M32452	FVC	-0.0070629	-0.00057
ENSG00000134184	M32654	ApoA	-0.020523	-0.02388
ENSG00000134184	M32654	bilirubin	-0.0097513	-0.009
ENSG00000134184	M32654	Cr	-0.0020763	-0.00265
ENSG00000134184	M32654	SHBG	0.018133	0.01675
ENSG00000261015	M32654	ApoA	0.0028201	0.00762
ENSG00000261015	M32654	bilirubin	-0.0036683	0.00019
ENSG00000261015	M32654	Cr	-0.0012331	0.00171
ENSG00000261015	M32654	SHBG	0.00186	0.00014
ENSG00000134824	M33228	albumin	-0.00032314	-0.00294
ENSG00000134824	M33228	ALP	0.03357	0.04117
ENSG00000134824	M33228	ApoA	-0.037247	-0.03481
ENSG00000134824	M33228	bilirubin	-0.01742	-0.01309
ENSG00000134824	M33228	Ca	-0.0084299	-0.01058
ENSG00000134824	M33228	CRP	-0.0075835	-0.0069
ENSG00000134824	M33228	cystatinC	-0.019019	-0.01756
ENSG00000134824	M33228	glucose	-0.016476	-0.01564
ENSG00000134824	M33228	HbA1c	-0.023625	-0.00896
ENSG00000134824	M33228	height	-0.010864	-0.00203
ENSG00000134824	M33228	IGF1	-0.017651	-0.01051
ENSG00000134824	M33228	testosterone	-0.015631	-0.01631
ENSG00000134824	M33228	total_protein	0.033897	0.03273
ENSG00000134825	M33228	albumin	0.017362	-0.00533
ENSG00000134825	M33228	ALP	0.13875	0.10753
ENSG00000134825	M33228	ApoA	-0.10351	-0.0893
ENSG00000134825	M33228	bilirubin	-0.051018	-0.03139
ENSG00000134825	M33228	Ca	-0.028265	-0.03307
ENSG00000134825	M33228	CRP	-0.021331	0.0118
ENSG00000134825	M33228	cystatinC	-0.048476	-0.03642
ENSG00000134825	M33228	glucose	-0.055849	-0.06
ENSG00000134825	M33228	HbA1c	-0.069078	-0.02772
ENSG00000134825	M33228	height	-0.043806	-0.00265
ENSG00000134825	M33228	IGF1	-0.056193	-0.03791
ENSG00000134825	M33228	testosterone	-0.034203	-0.03689
ENSG00000134825	M33228	total_protein	0.08769	0.06816
ENSG00000149485	M33228	albumin	0.015816	0.018
ENSG00000149485	M33228	ALP	0.03805	0.10707
ENSG00000149485	M33228	ApoA	-0.050563	-0.08654
ENSG00000149485	M33228	bilirubin	-0.0045615	-0.04173
ENSG00000149485	M33228	Ca	-0.014272	-0.01307
ENSG00000149485	M33228	CRP	-0.023751	-0.02432
ENSG00000149485	M33228	cystatinC	-0.04579	-0.04495
ENSG00000149485	M33228	glucose	-0.046122	-0.04378
ENSG00000149485	M33228	HbA1c	-0.057248	-0.05493
ENSG00000149485	M33228	height	-0.042967	-0.0421
ENSG00000149485	M33228	IGF1	-0.016254	-0.04644
ENSG00000149485	M33228	testosterone	-0.032484	-0.03144
ENSG00000149485	M33228	total_protein	0.045076	0.08213
ENSG00000134824	M34214	albumin	-0.00032314	-0.00334
ENSG00000134825	M34214	albumin	0.017362	-0.00125
ENSG00000167608	M34214	albumin	-0.016367	-0.0095
ENSG00000128944	M34407	Cr	-0.00506	0.00201
ENSG00000128944	M34407	CRP	0.0037352	0.00832
ENSG00000128944	M34407	IGF1	0.00022509	-0.00489
ENSG00000128944	M34407	phosphate	-0.0019441	-0.01486
ENSG00000128944	M34407	urate	0.0041152	0.01333
ENSG00000140323	M34407	Cr	0.00073157	-0.01727
ENSG00000140323	M34407	CRP	0.0018485	-0.00362
ENSG00000140323	M34407	IGF1	0.014686	0.01943
ENSG00000140323	M34407	phosphate	0.014151	0.01975
ENSG00000140323	M34407	urate	0.0012355	-0.01057
ENSG00000197208	M34407	Cr	-0.037473	-0.0294
ENSG00000197208	M34407	CRP	-0.012954	0.00076
ENSG00000197208	M34407	IGF1	0.032633	0.00952
ENSG00000197208	M34407	phosphate	0.022735	0.01309
ENSG00000197208	M34407	urate	-0.036569	-0.02499
ENSG00000197375	M34407	Cr	-0.015015	-0.01936
ENSG00000197375	M34407	CRP	-0.0091049	-0.01081
ENSG00000197375	M34407	IGF1	0.013542	0.01804
ENSG00000197375	M34407	phosphate	0.024145	0.02457
ENSG00000197375	M34407	urate	-0.022301	-0.0206
ENSG00000134824	M35186	ALT	-0.011995	-0.01252
ENSG00000134824	M35186	ApoA	-0.037247	0.00359
ENSG00000134824	M35186	CRP	-0.0075835	-0.00619
ENSG00000134824	M35186	diastolic_BP	0.0065589	0.00543
ENSG00000134824	M35186	heart_rate	0.031767	0.02886
ENSG00000134824	M35186	IGF1	-0.017651	-0.02179
ENSG00000134824	M35186	total_protein	0.033897	0.02755
ENSG00000134824	M35186	urate	0.010671	0.00799
ENSG00000134825	M35186	ALT	-0.019566	-0.00299
ENSG00000134825	M35186	ApoA	-0.10351	0.05839
ENSG00000134825	M35186	CRP	-0.021331	0.00626
ENSG00000134825	M35186	diastolic_BP	0.01984	0.02107
ENSG00000134825	M35186	heart_rate	0.085315	0.06033
ENSG00000134825	M35186	IGF1	-0.056193	-0.07613
ENSG00000134825	M35186	total_protein	0.08769	0.05242
ENSG00000134825	M35186	urate	0.0558	0.03284
ENSG00000142606	M35186	ALT	-0.0056393	-0.00201
ENSG00000142606	M35186	ApoA	0.0018342	0.02685
ENSG00000142606	M35186	CRP	-0.0083448	-0.00404
ENSG00000142606	M35186	diastolic_BP	0.00097312	-0.00167
ENSG00000142606	M35186	heart_rate	0.010341	0.00148
ENSG00000142606	M35186	IGF1	-0.010676	-0.00617
ENSG00000142606	M35186	total_protein	0.022593	0.01218
ENSG00000142606	M35186	urate	-0.0082065	-0.01491
ENSG00000149485	M35186	ALT	-0.034274	-0.03273
ENSG00000149485	M35186	ApoA	-0.050563	-0.08654
ENSG00000149485	M35186	CRP	-0.023751	-0.02432
ENSG00000149485	M35186	diastolic_BP	0.019883	0.02136
ENSG00000149485	M35186	heart_rate	0.020072	0.06719
ENSG00000149485	M35186	IGF1	-0.016254	-0.04644
ENSG00000149485	M35186	total_protein	0.045076	0.08213
ENSG00000149485	M35186	urate	0.042653	0.03117
ENSG00000103064	M35439	BMI	-0.012595	-0.01425
ENSG00000103064	M35439	Cr	-0.035449	-0.0385
ENSG00000103064	M35439	diastolic_BP	-0.018804	-0.02188
ENSG00000103064	M35439	total_protein	0.0063763	0.00867
ENSG00000104889	M35439	BMI	0.0012892	0.00573
ENSG00000104889	M35439	Cr	0.017538	0.01041
ENSG00000104889	M35439	diastolic_BP	0.015776	-0.02129
ENSG00000104889	M35439	total_protein	-0.008565	-0.03082
ENSG00000105607	M35439	BMI	-0.010876	-0.01074
ENSG00000105607	M35439	Cr	-0.016723	-0.01786
ENSG00000105607	M35439	diastolic_BP	-0.0072181	-0.01074
ENSG00000105607	M35439	total_protein	-0.010518	-0.01018
ENSG00000157184	M35439	BMI	0.0074397	-0.00215
ENSG00000157184	M35439	Cr	-0.011712	-0.00433
ENSG00000157184	M35439	diastolic_BP	0.010342	-0.0129
ENSG00000157184	M35439	total_protein	0.0025686	-0.03389
ENSG00000167261	M35439	BMI	0.0014504	-0.0012
ENSG00000167261	M35439	Cr	-0.0043701	0.00373
ENSG00000167261	M35439	diastolic_BP	0.010117	0.00843
ENSG00000167261	M35439	total_protein	-0.016338	-0.01463
ENSG00000214401	M35439	BMI	-0.00032186	-0.00014
ENSG00000214401	M35439	Cr	-0.0023758	-0.0026
ENSG00000214401	M35439	diastolic_BP	-0.0067297	-0.00686
ENSG00000214401	M35439	total_protein	-0.025319	-0.01973
ENSG00000095321	M37058	ApoA	-0.0068383	-0.00734
ENSG00000095321	M37058	BMI	0.0041597	0.00257
ENSG00000095321	M37058	Cr	-0.012318	-0.01242
ENSG00000095321	M37058	systolic_BP	0.0094363	0.00993
ENSG00000095321	M37058	urate	0.0049902	0.00535
ENSG00000095321	M37058	urea	-0.0013808	-0.00206
ENSG00000138613	M37058	ApoA	-0.0033031	0.0043
ENSG00000138613	M37058	BMI	-0.0050906	-0.00545
ENSG00000138613	M37058	Cr	-0.01313	-0.01073
ENSG00000138613	M37058	systolic_BP	-0.0018093	-0.00391
ENSG00000138613	M37058	urate	-0.0089712	-0.00828
ENSG00000138613	M37058	urea	-0.0053572	0.00043
