# Supplementary material for: Exploiting the mediating role of the metabolome to unravel transcript-to-phenotype associations
Source: eLife. 2023 Mar 9;12:e81097. doi: 10.7554/eLife.81097 (PMC9998083; doi:10.7554/eLife.81097)
Supplement: Figure 4—figure supplement 2—source data 1. — Each cell represents the mean difference in power between TWMR and mediation analysis for a given scenario across 10 simulations. Rows reflect decreasing ratio between transcript-to-metabolite and metabolite-to-phenotype effects from 10 to 0.1 (sigma). Columns reflect increasing proportion of direct to total effect from –2 to 2 (rho). This file relates to Figure 4—figure supplement 2A. [file elife-81097-fig4-figsupp2-data1.xlsx]

## Sheet: Sheet1
sigma/direct	-2	-1.92	-1.84	-1.76	-1.68	-1.6	-1.52	-1.44	-1.36	-1.28	-1.2	-1.12	-1.04	-0.96	-0.88	-0.8	-0.72	-0.64	-0.56	-0.48	-0.4	-0.32	-0.24	-0.16	-0.08	0	0.08	0.16	0.24	0.32	0.4	0.48	0.56	0.64	0.72	0.8	0.88	0.96	1.04	1.12	1.2	1.28	1.36	1.44	1.52	1.6	1.68	1.76	1.84
10	-0.269515	-0.27355	-0.263385	-0.259447	-0.257103	-0.241893	-0.23573	-0.23834	-0.224385	-0.20359	-0.20063	-0.182585	-0.178452	-0.143405	-0.130295	-0.101737	-0.0627525	-0.02855	0.000703312	0.0373789	0.0803222	0.12942	0.186991	0.244126	0.316039	0.375042	0.439386	0.48938	0.540699	0.582607	0.612348	0.660915	0.681722	0.692237	0.693708	0.708067	0.701757	0.710799	0.7036	0.690765	0.702962	0.694255	0.693208	0.686775	0.657746	0.631321	0.592906	0.534632	0.489808
9.12011	-0.261825	-0.245188	-0.24344	-0.230593	-0.232992	-0.224702	-0.216672	-0.204123	-0.17879	-0.17649	-0.159125	-0.134818	-0.12126	-0.088235	-0.0565125	-0.053095	-0.0040725	0.032585	0.0779175	0.0999875	0.163928	0.228184	0.276067	0.325111	0.366999	0.432016	0.48086	0.527068	0.576869	0.611965	0.642732	0.66549	0.673513	0.708115	0.690665	0.699731	0.691759	0.702199	0.6814	0.697162	0.69734	0.694763	0.682973	0.687592	0.665944	0.652877	0.608267	0.567503	0.535781
8.31764	-0.24036	-0.232958	-0.21915	-0.202572	-0.214103	-0.194103	-0.172907	-0.15763	-0.157298	-0.135352	-0.100392	-0.0905775	-0.0676875	-0.030725	-0.0026825	0.0274	0.0634075	0.103825	0.136538	0.195288	0.242173	0.299831	0.345057	0.394055	0.444776	0.479351	0.529084	0.579524	0.611813	0.636121	0.658315	0.688236	0.687942	0.693357	0.690085	0.693	0.702361	0.699599	0.6888	0.696771	0.694004	0.706485	0.689469	0.691194	0.678903	0.66189	0.633358	0.607073	0.572238
7.58578	-0.213565	-0.200965	-0.18563	-0.167515	-0.169675	-0.158715	-0.141028	-0.121555	-0.0949425	-0.0833525	-0.065045	-0.0265175	-0.009055	0.0367675	0.0749	0.10261	0.133662	0.184087	0.22375	0.274633	0.321912	0.357048	0.402438	0.446032	0.486534	0.539935	0.569604	0.60083	0.632092	0.655842	0.672014	0.671932	0.687916	0.702022	0.711733	0.700673	0.696961	0.7006	0.695	0.695174	0.697249	0.702925	0.684808	0.692477	0.676816	0.656186	0.649749	0.635545	0.603777
6.91831	-0.181175	-0.16008	-0.141755	-0.134423	-0.126675	-0.101125	-0.0777	-0.0498025	-0.03601	-0.0045025	0.0168875	0.0434275	0.079375	0.0993475	0.146295	0.193485	0.235673	0.260755	0.298743	0.347647	0.38112	0.425052	0.470592	0.50478	0.533773	0.576235	0.610979	0.618445	0.646025	0.667813	0.683075	0.687684	0.695037	0.689131	0.704637	0.69875	0.690368	0.6948	0.694199	0.703768	0.702085	0.698793	0.699745	0.685782	0.685255	0.675037	0.665625	0.645344	0.628735
6.30957	-0.132013	-0.116305	-0.0997575	-0.063155	-0.0638225	-0.05179	-0.0128725	0.0108125	0.03936	0.06088	0.0909975	0.123207	0.165018	0.190105	0.22562	0.260865	0.301808	0.337307	0.383355	0.416768	0.44657	0.491113	0.514559	0.55436	0.568995	0.613288	0.626513	0.637368	0.654044	0.673809	0.672031	0.690176	0.704705	0.694266	0.698666	0.707956	0.696972	0.692	0.7046	0.697173	0.698719	0.703607	0.691274	0.681365	0.706234	0.678736	0.668786	0.663299	0.640314
5.7544	-0.0703275	-0.060795	-0.03819	-0.0128475	-0.000165	0.02659	0.048435	0.080195	0.121078	0.152685	0.17563	0.205485	0.231105	0.26887	0.301067	0.344768	0.36078	0.414982	0.434623	0.459018	0.5026	0.537288	0.57673	0.57834	0.610615	0.628585	0.64293	0.665055	0.669646	0.671441	0.702231	0.69382	0.692495	0.705352	0.692145	0.700393	0.697571	0.6872	0.690599	0.698571	0.701796	0.692535	0.702506	0.677398	0.691194	0.675227	0.680112	0.665257	0.662332
5.24807	-0.0013575	0.014585	0.0310425	0.054615	0.08058	0.111043	0.130908	0.161165	0.187507	0.221062	0.2507	0.283825	0.313953	0.348108	0.37614	0.400625	0.435258	0.457405	0.490053	0.517593	0.547068	0.564338	0.605795	0.608995	0.63135	0.648025	0.664025	0.66801	0.66159	0.683405	0.681554	0.702963	0.701213	0.689542	0.691993	0.694808	0.698578	0.698	0.7006	0.705778	0.699814	0.691588	0.68227	0.701962	0.700528	0.691593	0.684173	0.674145	0.660625
4.7863	0.070275	0.08627	0.0993175	0.131667	0.166155	0.210003	0.207913	0.236588	0.263072	0.307085	0.327275	0.369308	0.381103	0.423645	0.449535	0.456625	0.490322	0.5103	0.5434	0.5643	0.575497	0.603492	0.617528	0.632375	0.650807	0.65548	0.661767	0.667332	0.687316	0.679155	0.693353	0.699908	0.691175	0.700403	0.702107	0.693243	0.695171	0.7052	0.682799	0.691787	0.705845	0.698881	0.70356	0.697599	0.68888	0.688863	0.692614	0.684693	0.677702
4.36516	0.143565	0.166488	0.194227	0.227683	0.236235	0.264157	0.29071	0.322245	0.338913	0.367897	0.39357	0.41996	0.438055	0.464687	0.505935	0.521375	0.538312	0.55492	0.570967	0.592675	0.607337	0.622452	0.632387	0.653205	0.676687	0.668942	0.676165	0.684905	0.685375	0.69303	0.712706	0.69582	0.683939	0.692902	0.690177	0.694292	0.701372	0.691799	0.702599	0.700775	0.704667	0.703404	0.694535	0.688967	0.700694	0.69732	0.689239	0.69037	0.690418
3.98107	0.228382	0.24516	0.27035	0.287672	0.327767	0.340303	0.349235	0.387075	0.421585	0.433775	0.45191	0.472502	0.495223	0.52402	0.544072	0.554168	0.570735	0.598187	0.613302	0.625008	0.635493	0.651118	0.650695	0.66151	0.680693	0.67422	0.693	0.67417	0.68486	0.691041	0.69312	0.697473	0.701384	0.695534	0.702049	0.702676	0.700174	0.7018	0.7004	0.70198	0.70131	0.686457	0.707489	0.703084	0.702807	0.701095	0.691778	0.680638	0.687547
3.63078	0.301208	0.323977	0.344625	0.354475	0.38822	0.416992	0.438375	0.45809	0.468793	0.47729	0.513942	0.54328	0.547065	0.561495	0.580335	0.592485	0.606827	0.628173	0.63189	0.63358	0.65731	0.655905	0.66621	0.670597	0.685087	0.685658	0.69658	0.69	0.689937	0.69765	0.69682	0.698295	0.694427	0.693909	0.69412	0.700896	0.687391	0.7046	0.6948	0.700382	0.682698	0.693162	0.69468	0.689034	0.701518	0.706252	0.69116	0.694272	0.679697
3.31131	0.376985	0.376207	0.397967	0.431295	0.45258	0.468265	0.48603	0.500755	0.524785	0.530625	0.547207	0.5671	0.57957	0.60019	0.613235	0.62543	0.632278	0.642145	0.6486	0.6472	0.669968	0.672048	0.66856	0.683667	0.689213	0.686295	0.693547	0.69165	0.683635	0.70048	0.705082	0.714433	0.699447	0.699157	0.697426	0.695534	0.698371	0.6944	0.7032	0.704177	0.697915	0.707799	0.69696	0.701758	0.697985	0.690605	0.683685	0.68703	0.705448
3.01995	0.448732	0.449497	0.465083	0.501023	0.51297	0.509862	0.53899	0.557855	0.572603	0.559458	0.582172	0.598283	0.60573	0.627408	0.624437	0.638865	0.654327	0.655767	0.660892	0.661025	0.67747	0.676025	0.684288	0.675055	0.674643	0.69814	0.689597	0.683425	0.696368	0.703178	0.69442	0.698037	0.688008	0.69371	0.707242	0.698538	0.703381	0.7004	0.694599	0.689378	0.696731	0.703017	0.706074	0.691224	0.707777	0.702662	0.695005	0.697365	0.68657
2.75423	0.49438	0.510455	0.518757	0.532075	0.552468	0.555085	0.559242	0.584022	0.604245	0.614655	0.602583	0.62351	0.625657	0.647053	0.648922	0.65063	0.67218	0.664173	0.67351	0.679602	0.674503	0.681168	0.680153	0.698333	0.68639	0.699828	0.68812	0.689743	0.71298	0.69893	0.69483	0.691782	0.695375	0.688946	0.699695	0.704538	0.691585	0.701999	0.684399	0.706567	0.690942	0.699647	0.690578	0.689958	0.696423	0.683283	0.701555	0.683673	0.70413
2.51189	0.537412	0.536423	0.556965	0.56995	0.582102	0.590152	0.60714	0.60597	0.625628	0.626395	0.64383	0.649412	0.652685	0.654245	0.669098	0.65178	0.67847	0.677295	0.679667	0.682233	0.685638	0.687763	0.672878	0.689345	0.69739	0.694083	0.69294	0.697438	0.68691	0.692535	0.709383	0.697825	0.687078	0.692228	0.698121	0.702952	0.699584	0.6962	0.704399	0.701788	0.703152	0.698694	0.691425	0.713811	0.702823	0.694782	0.703365	0.693882	0.692412
2.29087	0.574925	0.580368	0.599465	0.598975	0.610675	0.617622	0.62495	0.63243	0.654012	0.655735	0.656377	0.662072	0.657292	0.662805	0.666978	0.673765	0.679215	0.678615	0.686972	0.694758	0.685948	0.70062	0.687985	0.679682	0.701488	0.705838	0.68343	0.694338	0.694885	0.68668	0.697	0.69854	0.693488	0.70205	0.696131	0.706754	0.70059	0.708999	0.6968	0.702383	0.716763	0.709733	0.69802	0.691142	0.700972	0.699462	0.708472	0.706298	0.701767
2.0893	0.619668	0.607267	0.61692	0.633795	0.646983	0.655288	0.650107	0.65052	0.66932	0.658698	0.66468	0.660488	0.669883	0.689063	0.679922	0.679103	0.681593	0.682063	0.68617	0.692353	0.708353	0.683195	0.69835	0.6923	0.68745	0.701995	0.693425	0.698287	0.698585	0.693102	0.702605	0.703538	0.706965	0.704873	0.70892	0.688766	0.692189	0.6876	0.7012	0.691993	0.706358	0.69653	0.69589	0.696987	0.69729	0.695925	0.71171	0.707422	0.686445
1.90546	0.628795	0.632347	0.644212	0.651845	0.65412	0.657587	0.656	0.666835	0.67055	0.675053	0.678153	0.671778	0.66715	0.684978	0.686758	0.68108	0.675895	0.697677	0.686395	0.6922	0.687433	0.69785	0.686932	0.69927	0.703715	0.70343	0.704407	0.695163	0.702252	0.69126	0.69785	0.70213	0.696655	0.696292	0.686163	0.697578	0.694584	0.698197	0.6924	0.700388	0.692373	0.688545	0.703503	0.703638	0.693397	0.70046	0.711893	0.69615	0.700627
1.7378	0.647543	0.641648	0.66589	0.66385	0.650667	0.675652	0.66652	0.675177	0.670375	0.665815	0.667867	0.696823	0.681497	0.66994	0.68677	0.703788	0.689845	0.70346	0.689168	0.699345	0.68673	0.705518	0.682785	0.693982	0.70999	0.70358	0.694398	0.701878	0.702668	0.69642	0.693685	0.6986	0.71087	0.68533	0.70236	0.69958	0.692395	0.7022	0.6952	0.702	0.690575	0.699547	0.694545	0.702285	0.700422	0.692525	0.691052	0.705403	0.686155
1.58489	0.65213	0.66494	0.674763	0.669848	0.67102	0.674022	0.664253	0.674325	0.68558	0.676922	0.69192	0.672713	0.685983	0.686665	0.696272	0.692908	0.68083	0.700653	0.691418	0.701885	0.685063	0.696057	0.694972	0.696495	0.699002	0.68425	0.700222	0.703858	0.698717	0.713305	0.704605	0.69885	0.699075	0.695542	0.705172	0.701178	0.693586	0.6962	0.693399	0.698588	0.694778	0.705573	0.702545	0.698675	0.69902	0.688767	0.697863	0.69835	0.70609
1.44544	0.672085	0.674153	0.684055	0.681697	0.688318	0.68468	0.669585	0.676333	0.682697	0.69345	0.67432	0.69514	0.692015	0.70114	0.69128	0.691725	0.690993	0.6954	0.704888	0.702618	0.698085	0.707625	0.70541	0.700063	0.711265	0.68878	0.687955	0.688368	0.708285	0.684985	0.70321	0.711895	0.699333	0.702163	0.686362	0.70838	0.69239	0.6926	0.694399	0.697995	0.70518	0.696762	0.693335	0.699095	0.697887	0.68804	0.700793	0.694115	0.68879
1.31826	0.68365	0.68792	0.680297	0.681667	0.68044	0.673273	0.69263	0.692512	0.685608	0.68821	0.696477	0.695908	0.688092	0.691163	0.691355	0.693405	0.702235	0.694178	0.698117	0.692545	0.70137	0.710448	0.70446	0.705955	0.70935	0.697235	0.694342	0.691065	0.701958	0.70283	0.702865	0.686695	0.701753	0.705143	0.699575	0.69519	0.695993	0.703199	0.698399	0.7056	0.699187	0.695375	0.692362	0.693547	0.707905	0.68903	0.695835	0.702392	0.700025
1.20226	0.69409	0.694098	0.692588	0.687078	0.68696	0.688102	0.691307	0.696902	0.690013	0.691465	0.702398	0.69234	0.697612	0.708625	0.701122	0.708605	0.688172	0.69925	0.692773	0.695632	0.695465	0.696407	0.710797	0.69629	0.711117	0.7024	0.690442	0.691365	0.69541	0.69504	0.695083	0.69673	0.697523	0.697377	0.699987	0.695175	0.700988	0.698399	0.699798	0.69379	0.69498	0.701375	0.693558	0.690747	0.693925	0.69987	0.699835	0.69982	0.700315
1.09648	0.69648	0.675985	0.686207	0.696345	0.697218	0.68612	0.683435	0.698525	0.70551	0.701145	0.697832	0.703565	0.696645	0.691248	0.694368	0.69333	0.704392	0.694152	0.705497	0.699915	0.697072	0.69808	0.696227	0.69189	0.692617	0.71327	0.697735	0.695575	0.694845	0.698075	0.686503	0.701553	0.686165	0.695573	0.70458	0.696972	0.706188	0.698199	0.695598	0.712	0.693185	0.699175	0.694562	0.69834	0.708928	0.697335	0.6999	0.706635	0.697187
1	0.691013	0.68541	0.701242	0.695847	0.696115	0.705645	0.697847	0.688092	0.705032	0.69169	0.692017	0.687832	0.69725	0.698295	0.694673	0.698315	0.698612	0.695075	0.704492	0.698743	0.688715	0.700233	0.707102	0.698362	0.69167	0.69513	0.694765	0.694055	0.71047	0.698715	0.689905	0.690535	0.702363	0.69617	0.705795	0.704793	0.697993	0.7028	0.690595	0.695998	0.702582	0.694987	0.696778	0.697562	0.70297	0.687922	0.704527	0.698455	0.696022
0.912011	0.69414	0.704213	0.695597	0.69438	0.69034	0.692475	0.704052	0.696595	0.69042	0.69203	0.682312	0.70095	0.684388	0.684823	0.699545	0.702268	0.692987	0.692958	0.690882	0.696565	0.696553	0.69618	0.713612	0.697128	0.695368	0.702993	0.69865	0.69971	0.685085	0.695095	0.70875	0.696362	0.707762	0.70018	0.691595	0.69359	0.697392	0.693996	0.691598	0.693798	0.696398	0.696175	0.702575	0.689555	0.697565	0.706333	0.688307	0.709095	0.69068
0.831764	0.708882	0.697253	0.696695	0.69137	0.692725	0.684823	0.69701	0.686418	0.69254	0.695523	0.693943	0.693532	0.707093	0.693115	0.683662	0.696762	0.691682	0.690033	0.70888	0.705947	0.695385	0.699055	0.694682	0.688597	0.6944	0.69805	0.69525	0.702078	0.698913	0.70175	0.703148	0.69756	0.698383	0.700372	0.68519	0.686998	0.697593	0.699798	0.6912	0.703592	0.694597	0.691385	0.710187	0.700172	0.703565	0.68737	0.69714	0.691342	0.684925
0.758578	0.68849	0.69391	0.697473	0.702192	0.69624	0.689893	0.690987	0.684893	0.709222	0.706078	0.70349	0.69907	0.68991	0.702202	0.69205	0.688248	0.70408	0.701263	0.701512	0.690635	0.699155	0.693577	0.70899	0.70219	0.706272	0.700693	0.710503	0.696485	0.707133	0.702943	0.698355	0.697558	0.707377	0.688987	0.698388	0.702395	0.707795	0.6954	0.701	0.691793	0.701398	0.685985	0.70797	0.708183	0.706965	0.710157	0.691747	0.703523	0.697115
0.691831	0.69108	0.688685	0.703925	0.696183	0.710498	0.69723	0.693775	0.68626	0.689357	0.702255	0.68978	0.695195	0.697085	0.69555	0.7017	0.689545	0.689218	0.70438	0.70227	0.702762	0.70656	0.708028	0.687825	0.698268	0.70349	0.690503	0.700533	0.693523	0.696355	0.69338	0.700362	0.692982	0.697383	0.69998	0.692797	0.69079	0.701797	0.6992	0.687798	0.698398	0.705198	0.697788	0.704183	0.701383	0.70619	0.70936	0.69895	0.697145	0.70414
0.630957	0.69461	0.707348	0.695362	0.69829	0.690617	0.696152	0.697398	0.69125	0.70861	0.697093	0.70697	0.69544	0.693908	0.69535	0.696725	0.699425	0.691455	0.70076	0.691538	0.694955	0.700017	0.695048	0.682268	0.695307	0.699515	0.697723	0.70673	0.700155	0.70694	0.70477	0.70859	0.689172	0.703375	0.705195	0.69319	0.692198	0.705	0.7022	0.6972	0.696793	0.704797	0.705395	0.694595	0.700383	0.70177	0.70277	0.706775	0.687168	0.698157
0.57544	0.68658	0.705682	0.699533	0.70357	0.701885	0.683207	0.70046	0.700505	0.694555	0.692588	0.697887	0.704573	0.702738	0.709852	0.703275	0.711727	0.69194	0.710997	0.707427	0.693245	0.696685	0.704055	0.691875	0.697705	0.69793	0.70052	0.708738	0.69476	0.689155	0.691353	0.697985	0.700185	0.702585	0.70339	0.696993	0.68699	0.6932	0.7018	0.705398	0.6982	0.6952	0.706398	0.693588	0.69538	0.705573	0.698972	0.697362	0.696562	0.710527
0.524807	0.696265	0.70194	0.709415	0.694035	0.704747	0.708973	0.70206	0.702503	0.704585	0.695338	0.697573	0.70183	0.69826	0.69971	0.709588	0.694585	0.708823	0.699815	0.694283	0.69686	0.703303	0.70273	0.700283	0.696532	0.69794	0.689735	0.691767	0.70696	0.69997	0.70997	0.691385	0.700985	0.704583	0.705793	0.698	0.714198	0.7074	0.6952	0.7028	0.701192	0.686195	0.695795	0.685998	0.701793	0.70699	0.70278	0.704185	0.705365	0.703547
0.47863	0.699632	0.690272	0.705363	0.700242	0.702315	0.692305	0.69957	0.705897	0.694847	0.699067	0.705655	0.69252	0.690538	0.70198	0.695967	0.703213	0.692817	0.696693	0.695703	0.690107	0.6971	0.701727	0.704322	0.700125	0.708943	0.696348	0.69356	0.696765	0.70337	0.69959	0.700385	0.700592	0.67899	0.703192	0.693795	0.704793	0.707198	0.6944	0.705198	0.708	0.700192	0.695795	0.697588	0.705588	0.692187	0.693982	0.697975	0.688782	0.701372
0.436516	0.69823	0.699335	0.695715	0.702192	0.692813	0.696198	0.699832	0.701917	0.686098	0.704978	0.7106	0.698955	0.680998	0.70621	0.708005	0.68967	0.695875	0.70248	0.702535	0.705305	0.695125	0.688732	0.70453	0.700963	0.701557	0.696955	0.693785	0.69718	0.700788	0.701982	0.70818	0.699592	0.70199	0.703392	0.699797	0.692597	0.694797	0.7136	0.6952	0.696998	0.699398	0.691397	0.697192	0.703993	0.70839	0.696588	0.704187	0.700585	0.697577
0.398107	0.69198	0.690203	0.694438	0.70246	0.705228	0.696492	0.695155	0.712225	0.699025	0.696218	0.696635	0.682427	0.70741	0.704075	0.695075	0.692295	0.709315	0.700708	0.696937	0.703925	0.701353	0.687335	0.690152	0.697758	0.694982	0.707377	0.704163	0.69557	0.701585	0.702582	0.706795	0.703388	0.696995	0.693795	0.6922	0.7018	0.6868	0.698798	0.6932	0.701597	0.700998	0.6766	0.689392	0.700597	0.704797	0.701392	0.701185	0.697788	0.695965
0.363078	0.692085	0.691505	0.69814	0.703932	0.699908	0.70112	0.698987	0.69522	0.703635	0.70319	0.69588	0.701882	0.70149	0.708682	0.70069	0.704495	0.698887	0.700533	0.711335	0.69574	0.699327	0.700357	0.711555	0.692775	0.701565	0.697183	0.700377	0.69417	0.708175	0.693178	0.701788	0.7048	0.69159	0.693785	0.70039	0.6918	0.694	0.700797	0.70859	0.685993	0.7024	0.703793	0.695995	0.693195	0.702592	0.696383	0.711583	0.700788	0.697385
0.331131	0.691728	0.690215	0.706618	0.702372	0.699	0.706225	0.70242	0.69864	0.701852	0.701675	0.700705	0.696095	0.696503	0.702337	0.700137	0.707307	0.705955	0.701518	0.69412	0.700747	0.696955	0.70016	0.691365	0.701967	0.701577	0.693762	0.696762	0.697183	0.70579	0.700788	0.696187	0.705592	0.706585	0.701392	0.699795	0.695	0.7004	0.7034	0.700797	0.6974	0.7032	0.695395	0.690797	0.699392	0.686995	0.69859	0.701588	0.697795	0.691383
0.301995	0.701565	0.706603	0.705843	0.692447	0.703445	0.68528	0.692682	0.6889	0.700277	0.682535	0.697303	0.700542	0.705512	0.695145	0.69995	0.703925	0.695943	0.699168	0.710155	0.699163	0.696573	0.69458	0.696978	0.698185	0.691585	0.696985	0.705375	0.69179	0.702192	0.7042	0.699788	0.704388	0.697797	0.699392	0.693998	0.693595	0.697192	0.691198	0.7064	0.696998	0.686198	0.7044	0.696595	0.693195	0.691385	0.70179	0.70039	0.69499	0.698192
0.275423	0.688793	0.70885	0.708457	0.691098	0.702318	0.7073	0.696905	0.702298	0.704122	0.692122	0.692685	0.700923	0.689747	0.70135	0.697945	0.69216	0.699372	0.699168	0.712355	0.704782	0.701975	0.709777	0.698183	0.698582	0.698775	0.69957	0.695183	0.696398	0.692395	0.691595	0.70759	0.697595	0.700398	0.706398	0.706797	0.691597	0.693597	0.6902	0.698998	0.702	0.691797	0.7014	0.705192	0.694595	0.704795	0.706595	0.70659	0.707795	0.711777
0.251189	0.69169	0.69569	0.70427	0.679875	0.689717	0.68951	0.696115	0.6959	0.704518	0.706512	0.699937	0.704337	0.695157	0.696145	0.702758	0.704375	0.694775	0.695965	0.688775	0.709777	0.690377	0.704375	0.69539	0.703993	0.702195	0.694592	0.696185	0.704592	0.68979	0.696198	0.694595	0.6988	0.7086	0.689198	0.709797	0.696597	0.7004	0.6886	0.692597	0.705198	0.693195	0.7034	0.705997	0.699993	0.687597	0.689198	0.69979	0.697998	0.700192
0.229087	0.697477	0.690702	0.698715	0.702505	0.696335	0.701895	0.699542	0.695535	0.704157	0.694553	0.695738	0.703365	0.711355	0.69635	0.698932	0.698575	0.70136	0.701375	0.692985	0.673373	0.70139	0.702585	0.694383	0.68997	0.696987	0.697993	0.705592	0.700987	0.704198	0.702998	0.692392	0.702793	0.691392	0.709997	0.693797	0.701998	0.6984	0.7008	0.6936	0.703198	0.6962	0.688198	0.695793	0.686392	0.711995	0.696395	0.704797	0.698192	0.70099
0.20893	0.695715	0.69874	0.695928	0.71074	0.692728	0.705148	0.701553	0.69854	0.700743	0.69377	0.70316	0.702163	0.706152	0.695568	0.70416	0.70116	0.700172	0.702982	0.705767	0.69819	0.695383	0.699178	0.69879	0.701383	0.697192	0.701985	0.698793	0.692995	0.693797	0.70419	0.6894	0.698993	0.695795	0.6986	0.7026	0.692397	0.6872	0.6998	0.6936	0.7024	0.700995	0.6938	0.703398	0.702797	0.696993	0.689593	0.697392	0.6932	0.705198
0.190546	0.688532	0.689735	0.699743	0.711553	0.710755	0.70294	0.701157	0.695958	0.707377	0.69916	0.69577	0.697765	0.69677	0.708363	0.700972	0.71458	0.697778	0.708365	0.704187	0.695982	0.695588	0.69078	0.687395	0.707395	0.705797	0.687187	0.6994	0.700793	0.696192	0.706997	0.699797	0.701395	0.691397	0.699195	0.7032	0.695797	0.683595	0.6966	0.705398	0.708195	0.7104	0.7046	0.698195	0.696395	0.699795	0.6988	0.701995	0.698797	0.69059
0.17378	0.696148	0.698738	0.70495	0.700747	0.704372	0.686763	0.701958	0.706363	0.705363	0.700375	0.695575	0.703982	0.694582	0.69438	0.704788	0.708385	0.692782	0.69119	0.705788	0.694585	0.697192	0.69359	0.69239	0.685388	0.70179	0.700195	0.689585	0.694398	0.69899	0.710395	0.704995	0.69999	0.692	0.714198	0.690797	0.694797	0.6912	0.7086	0.6902	0.7152	0.709198	0.6958	0.692397	0.6934	0.695588	0.691397	0.711997	0.704592	0.700993
0.158489	0.707157	0.69656	0.69596	0.70337	0.693148	0.694375	0.68457	0.703163	0.694383	0.689383	0.693775	0.689383	0.694972	0.688987	0.697377	0.695987	0.700788	0.697588	0.711592	0.69938	0.704777	0.709592	0.691998	0.694398	0.702597	0.695993	0.699398	0.698795	0.687793	0.691397	0.691995	0.677798	0.696595	0.6966	0.6942	0.6966	0.6964	0.7056	0.696198	0.693797	0.7046	0.7046	0.6968	0.693797	0.701198	0.7034	0.704	0.702395	0.711392
0.144544	0.68957	0.69437	0.695767	0.693575	0.703375	0.697975	0.700985	0.701963	0.691967	0.692172	0.702773	0.69077	0.700985	0.693788	0.695778	0.710577	0.695775	0.706193	0.688787	0.699995	0.701985	0.709793	0.701982	0.699995	0.693797	0.687187	0.696795	0.68579	0.712195	0.685795	0.691595	0.6974	0.713	0.706797	0.7136	0.699797	0.701398	0.700998	0.69	0.6846	0.701998	0.695592	0.708995	0.7002	0.697797	0.695198	0.703795	0.693597	0.702
0.131826	0.69137	0.694982	0.714573	0.69678	0.692178	0.70257	0.686383	0.703785	0.706987	0.711565	0.703195	0.709577	0.69579	0.698192	0.69739	0.69219	0.683588	0.698192	0.70719	0.699183	0.699993	0.706793	0.697187	0.705595	0.699398	0.695395	0.696	0.697388	0.711793	0.702198	0.703998	0.701998	0.690198	0.688998	0.692	0.700797	0.7038	0.698797	0.7032	0.696198	0.7044	0.697595	0.6996	0.695198	0.701198	0.701	0.709595	0.7016	0.702592
0.120226	0.696383	0.691993	0.69376	0.68758	0.697183	0.694375	0.69337	0.704383	0.707985	0.690575	0.681397	0.711185	0.711385	0.701385	0.687588	0.689192	0.7054	0.688187	0.691597	0.699793	0.68399	0.7022	0.692797	0.698788	0.702993	0.6952	0.695395	0.6972	0.696795	0.6952	0.702797	0.692	0.6996	0.7058	0.705797	0.6902	0.7068	0.697	0.699198	0.6936	0.7098	0.7082	0.6882	0.682198	0.696398	0.695395	0.716795	0.684995	0.685397
0.109648	0.711193	0.69797	0.69219	0.703385	0.699185	0.685985	0.703377	0.69718	0.694597	0.698982	0.70419	0.709785	0.709592	0.701192	0.708592	0.71139	0.684595	0.700595	0.704795	0.7176	0.703793	0.704998	0.696398	0.699195	0.697795	0.7018	0.691995	0.700998	0.688797	0.695795	0.7068	0.696998	0.6958	0.7042	0.682	0.690998	0.6978	0.698	0.7008	0.71	0.704995	0.688397	0.702597	0.6974	0.697198	0.700398	0.708997	0.697192	0.693198
0.1	0.695788	0.702975	0.691383	0.693577	0.705592	0.701582	0.695585	0.69599	0.698797	0.705588	0.694795	0.7076	0.701595	0.70178	0.694993	0.680787	0.703187	0.691795	0.694595	0.694588	0.69679	0.702198	0.690993	0.694793	0.68679	0.70659	0.673597	0.683597	0.6938	0.692998	0.697998	0.690998	0.704195	0.699797	0.690797	0.698597	0.695	0.6956	0.695398	0.6962	0.699797	0.7022	0.694595	0.6758	0.7032	0.69	0.7096	0.706	0.698198
[truncated: 2 more columns]
