# Supplementary material for: Exploiting the mediating role of the metabolome to unravel transcript-to-phenotype associations
Source: eLife. 2023 Mar 9;12:e81097. doi: 10.7554/eLife.81097 (PMC9998083; doi:10.7554/eLife.81097)
Supplement: Figure 4—figure supplement 2—source data 2. — Each cell represents the mean difference in power between TWMR and mediation analysis for a given scenario across 10 simulations. Rows reflect decreasing ratio between transcript-to-metabolite and metabolite-to-phenotype effects from 10 to 0.1 (sigma). Columns reflect increasing proportion of direct to total effect from –2 to 2 (rho). This file relates to Figure 4—figure supplement 2B. [file elife-81097-fig4-figsupp2-data2.xlsx]

## Sheet: Sheet1
sigma/direct	-2	-1.92	-1.84	-1.76	-1.68	-1.6	-1.52	-1.44	-1.36	-1.28	-1.2	-1.12	-1.04	-0.96	-0.88	-0.8	-0.72	-0.64	-0.56	-0.48	-0.4	-0.32	-0.24	-0.16	-0.08	0	0.08	0.16	0.24	0.32	0.4	0.48	0.56	0.64	0.72	0.8	0.88	0.96	1.04	1.12	1.2	1.28	1.36	1.44	1.52	1.6	1.68	1.76	1.84
10	-0.297803	-0.297325	-0.310462	-0.309518	-0.296992	-0.308755	-0.29772	-0.298057	-0.303538	-0.291495	-0.29076	-0.303345	-0.290442	-0.282838	-0.29201	-0.279316	-0.278407	-0.294332	-0.27002	-0.269473	-0.251848	-0.24774	-0.230536	-0.220916	-0.180524	-0.1506	-0.0982093	-0.0317872	0.0417335	0.161748	0.276832	0.396358	0.520284	0.61062	0.672484	0.688654	0.685139	0.702597	0.689599	0.697013	0.698394	0.671715	0.616876	0.534396	0.38924	0.270867	0.174573	0.0683608	-0.0277379
9.12011	-0.309957	-0.29257	-0.300812	-0.29398	-0.309795	-0.302482	-0.29965	-0.29433	-0.296258	-0.303698	-0.295003	-0.2956	-0.301212	-0.288042	-0.289295	-0.282297	-0.2774	-0.254305	-0.277861	-0.254885	-0.240043	-0.225517	-0.203811	-0.190878	-0.149124	-0.0929794	-0.0411241	0.0317211	0.101839	0.217219	0.333786	0.451766	0.555543	0.638384	0.666632	0.703985	0.691888	0.701198	0.708797	0.708018	0.687414	0.680961	0.621798	0.551438	0.444333	0.331511	0.217229	0.101716	0.0278091
8.31764	-0.290477	-0.299155	-0.303677	-0.29648	-0.29561	-0.292868	-0.295305	-0.29887	-0.295168	-0.281942	-0.284627	-0.28349	-0.276805	-0.268053	-0.268842	-0.277882	-0.271745	-0.25078	-0.247308	-0.22907	-0.201603	-0.19261	-0.179507	-0.139289	-0.108036	-0.0331689	0.0279821	0.0735558	0.186724	0.288931	0.383453	0.492544	0.579664	0.650598	0.675558	0.700782	0.70332	0.685	0.704797	0.703132	0.698796	0.674841	0.646846	0.573773	0.489612	0.389928	0.2773	0.186187	0.0952758
7.58578	-0.302187	-0.296733	-0.29924	-0.29142	-0.292988	-0.298295	-0.286888	-0.293535	-0.294083	-0.28455	-0.294565	-0.290005	-0.270767	-0.270473	-0.255895	-0.254063	-0.245438	-0.240267	-0.215202	-0.2062	-0.19272	-0.159527	-0.13705	-0.0940164	-0.0420365	0.0287053	0.0852222	0.167441	0.249254	0.356008	0.437574	0.53263	0.592162	0.657695	0.687846	0.689893	0.696112	0.694598	0.689999	0.695294	0.692893	0.687487	0.640987	0.593226	0.525785	0.444902	0.358584	0.259094	0.169468
6.91831	-0.295645	-0.293168	-0.299457	-0.292548	-0.285492	-0.29362	-0.285175	-0.29105	-0.27765	-0.286105	-0.277018	-0.264873	-0.25772	-0.262125	-0.251825	-0.244168	-0.222155	-0.209602	-0.187773	-0.177207	-0.147092	-0.109836	-0.06571	-0.0222125	0.0332501	0.0925777	0.170237	0.25081	0.341983	0.399002	0.488771	0.558722	0.626633	0.665168	0.68282	0.687494	0.703566	0.691998	0.708199	0.701558	0.689825	0.677993	0.663551	0.616293	0.56641	0.49976	0.403445	0.325475	0.24788
6.30957	-0.294558	-0.29164	-0.289025	-0.287397	-0.27902	-0.287002	-0.275725	-0.26628	-0.266408	-0.265323	-0.2625	-0.25418	-0.239707	-0.234678	-0.22981	-0.213235	-0.201285	-0.170398	-0.144987	-0.119298	-0.0902675	-0.056665	-0.010775	0.0502253	0.108705	0.166137	0.239005	0.318469	0.397083	0.472108	0.545513	0.591555	0.628957	0.672828	0.674113	0.709018	0.700571	0.709198	0.703399	0.68361	0.693654	0.687238	0.665973	0.638958	0.605648	0.532803	0.473522	0.414995	0.324095
5.7544	-0.283452	-0.286618	-0.278413	-0.291158	-0.284187	-0.270245	-0.27335	-0.258615	-0.252715	-0.250435	-0.2454	-0.219285	-0.214335	-0.202455	-0.19289	-0.18618	-0.155505	-0.138017	-0.0884075	-0.0667325	-0.0232925	0.027165	0.0655675	0.11975	0.192085	0.25234	0.318891	0.396673	0.465723	0.531392	0.574133	0.615515	0.668631	0.676421	0.701048	0.692273	0.700214	0.682399	0.690398	0.695632	0.698576	0.700017	0.666856	0.657205	0.613999	0.572709	0.515763	0.462297	0.379337
5.24807	-0.276282	-0.282193	-0.26649	-0.263757	-0.258935	-0.250843	-0.263792	-0.247622	-0.238717	-0.228582	-0.21632	-0.201365	-0.180007	-0.171975	-0.136907	-0.127545	-0.100625	-0.0673325	-0.036105	-0.0037625	0.0493675	0.102657	0.140198	0.216723	0.265568	0.321342	0.389437	0.451974	0.508288	0.570583	0.60467	0.651075	0.674149	0.676908	0.691435	0.698268	0.694442	0.694199	0.708199	0.690242	0.695137	0.690486	0.669548	0.660097	0.645365	0.589181	0.56063	0.51453	0.458258
4.7863	-0.266635	-0.25694	-0.2567	-0.241975	-0.23695	-0.24101	-0.226715	-0.219615	-0.196192	-0.198862	-0.173558	-0.178165	-0.143655	-0.134818	-0.104093	-0.072015	-0.04504	-0.015475	0.0291125	0.07458	0.12588	0.169535	0.225912	0.289318	0.34862	0.400635	0.452053	0.507535	0.549584	0.59273	0.63059	0.65987	0.667889	0.68595	0.688055	0.699834	0.69786	0.697999	0.706198	0.701064	0.682108	0.683468	0.688723	0.67939	0.664023	0.622687	0.603865	0.553655	0.50633
4.36516	-0.246512	-0.232912	-0.239157	-0.232277	-0.21834	-0.20518	-0.197887	-0.197158	-0.169948	-0.138322	-0.125195	-0.113867	-0.086595	-0.07055	-0.0290025	-0.0065975	0.01288	0.0707375	0.115343	0.157548	0.216298	0.25537	0.307677	0.374665	0.4086	0.456855	0.52015	0.55024	0.59043	0.620545	0.647427	0.663897	0.680009	0.699051	0.700868	0.696468	0.693492	0.709399	0.694799	0.685463	0.705998	0.700833	0.690889	0.680035	0.671816	0.646754	0.622965	0.592751	0.555597
3.98107	-0.2259	-0.215915	-0.213935	-0.200013	-0.181265	-0.169855	-0.15928	-0.136777	-0.139215	-0.10301	-0.0847575	-0.053725	-0.03285	0.001675	0.0336	0.07506	0.10697	0.136217	0.18508	0.236742	0.28638	0.3391	0.369132	0.417195	0.471147	0.513027	0.549068	0.587005	0.615433	0.649057	0.666257	0.674802	0.688193	0.697514	0.702263	0.700044	0.697484	0.706399	0.680999	0.702081	0.697956	0.692578	0.693837	0.679842	0.667847	0.647675	0.637153	0.621065	0.58503
3.63078	-0.187495	-0.19105	-0.172068	-0.143162	-0.147657	-0.121213	-0.110643	-0.087665	-0.0672125	-0.053475	-0.0052025	0.013735	0.025925	0.068315	0.10491	0.14174	0.173453	0.224747	0.26804	0.31514	0.353278	0.395165	0.445402	0.479442	0.515772	0.555283	0.588363	0.607102	0.64776	0.64975	0.670515	0.679432	0.688349	0.694847	0.691909	0.712467	0.6899	0.704398	0.698598	0.702907	0.696092	0.695098	0.704054	0.679797	0.678681	0.666075	0.654312	0.63637	0.60875
3.31131	-0.154837	-0.148872	-0.12697	-0.106787	-0.0992175	-0.071815	-0.0607275	-0.0345525	-0.0033975	0.02176	0.064385	0.07982	0.114278	0.161845	0.189495	0.22694	0.267358	0.307107	0.356137	0.37888	0.42038	0.456185	0.489025	0.518295	0.55445	0.574852	0.62215	0.63816	0.65406	0.67418	0.682688	0.680168	0.699433	0.70527	0.681154	0.694478	0.703317	0.6802	0.692399	0.703725	0.693672	0.692922	0.693494	0.679573	0.690193	0.673148	0.661013	0.647672	0.632567
3.01995	-0.108207	-0.106582	-0.0687575	-0.0357925	-0.024345	-0.0014075	0.01485	0.0342175	0.0577175	0.090125	0.134852	0.155905	0.192328	0.22038	0.278455	0.309035	0.33038	0.36083	0.417112	0.446698	0.487662	0.512062	0.537282	0.563617	0.602815	0.601198	0.621235	0.64844	0.648643	0.690392	0.68119	0.69859	0.696573	0.687675	0.695663	0.686192	0.707504	0.7088	0.705399	0.698521	0.691374	0.700315	0.696651	0.691425	0.681495	0.682438	0.6801	0.66058	0.650142
2.75423	-0.0364675	-0.0203275	-0.0119725	0.0225125	0.046285	0.0697175	0.08987	0.117813	0.155693	0.179405	0.20939	0.231898	0.260018	0.312497	0.342905	0.380185	0.401215	0.43108	0.456827	0.504417	0.526497	0.552597	0.573577	0.598237	0.617502	0.638075	0.662948	0.668702	0.676447	0.685447	0.684447	0.681608	0.69925	0.693438	0.703376	0.710746	0.706736	0.686398	0.693597	0.694528	0.691687	0.69872	0.686724	0.696345	0.689025	0.683215	0.67654	0.678198	0.6701
2.51189	0.0251725	0.0489675	0.065995	0.08483	0.12562	0.141735	0.171903	0.192417	0.223527	0.259195	0.295843	0.304488	0.338732	0.389443	0.402822	0.433677	0.4703	0.497883	0.516203	0.546678	0.561983	0.593448	0.613795	0.616705	0.643675	0.659447	0.65598	0.661505	0.675358	0.684375	0.691635	0.696105	0.692855	0.696429	0.70593	0.701511	0.707146	0.709198	0.691399	0.691544	0.697544	0.703583	0.700692	0.694855	0.702205	0.698497	0.687465	0.676157	0.671125
2.29087	0.09885	0.129438	0.139285	0.17351	0.206473	0.213585	0.245867	0.27496	0.29695	0.33387	0.35522	0.38541	0.402515	0.442978	0.45701	0.496003	0.513888	0.535033	0.555333	0.577492	0.59047	0.615695	0.620842	0.6535	0.655845	0.645925	0.682905	0.670377	0.679488	0.690895	0.702163	0.701255	0.685245	0.689844	0.687502	0.696614	0.69716	0.698398	0.698799	0.703337	0.693409	0.707661	0.696525	0.695922	0.70801	0.697673	0.694418	0.676295	0.679277
2.0893	0.177845	0.185087	0.232368	0.25029	0.274315	0.302333	0.322025	0.352135	0.374312	0.41368	0.43308	0.451373	0.465822	0.50027	0.524915	0.535623	0.563068	0.575835	0.58706	0.60677	0.62366	0.641223	0.653675	0.66098	0.651502	0.683272	0.68136	0.673615	0.70582	0.69344	0.694175	0.705025	0.693813	0.68945	0.69401	0.697029	0.696557	0.690997	0.695598	0.684763	0.696223	0.697385	0.697998	0.702353	0.699283	0.690233	0.693592	0.682697	0.673758
1.90546	0.254845	0.294675	0.31546	0.323097	0.357227	0.388587	0.40204	0.413825	0.444628	0.453568	0.471778	0.500742	0.525907	0.548998	0.559447	0.567545	0.587398	0.615328	0.62622	0.625493	0.647545	0.629158	0.65377	0.66622	0.67584	0.679515	0.684485	0.688288	0.684248	0.688242	0.69895	0.69433	0.704008	0.689952	0.697618	0.693072	0.703164	0.6974	0.696798	0.696359	0.701298	0.682701	0.68359	0.695227	0.698342	0.709645	0.695767	0.687865	0.691233
1.7378	0.331578	0.353662	0.383855	0.39744	0.41565	0.43495	0.45721	0.47314	0.488872	0.512485	0.52973	0.544408	0.565395	0.576923	0.603105	0.622895	0.604792	0.628685	0.637857	0.647857	0.656872	0.658902	0.669183	0.685485	0.67171	0.67858	0.69216	0.685423	0.692665	0.710662	0.69826	0.699187	0.693725	0.702715	0.685385	0.688098	0.698588	0.697797	0.685198	0.698563	0.704295	0.700138	0.694725	0.678735	0.6938	0.701198	0.700412	0.698653	0.69958
1.58489	0.396313	0.42429	0.433723	0.465863	0.47852	0.500692	0.515018	0.524913	0.535505	0.554682	0.558573	0.578133	0.594727	0.61049	0.61133	0.628957	0.639147	0.64398	0.647068	0.654395	0.668315	0.667268	0.679075	0.67755	0.677303	0.685057	0.694405	0.693873	0.70734	0.705387	0.698433	0.694225	0.70271	0.697832	0.695445	0.69232	0.697584	0.704397	0.698597	0.690186	0.69892	0.701993	0.709005	0.69674	0.697518	0.694858	0.704315	0.70295	0.698383
1.44544	0.472185	0.471278	0.49948	0.519338	0.519837	0.529995	0.562075	0.562673	0.581882	0.589712	0.599727	0.61756	0.616315	0.62287	0.6262	0.64613	0.660525	0.67215	0.6702	0.66653	0.67433	0.691815	0.678035	0.67585	0.694377	0.69807	0.685033	0.69236	0.709002	0.696568	0.696518	0.697643	0.693285	0.698292	0.682893	0.70173	0.694378	0.692797	0.702	0.689776	0.691525	0.70129	0.699325	0.686468	0.697483	0.700773	0.704298	0.683405	0.687573
1.31826	0.512317	0.526035	0.539562	0.551037	0.567495	0.575377	0.582222	0.606475	0.599365	0.614935	0.613765	0.640415	0.65174	0.64844	0.661528	0.670305	0.658423	0.659743	0.67711	0.680485	0.68776	0.690468	0.690852	0.677987	0.690782	0.700427	0.703967	0.70028	0.714302	0.698732	0.692785	0.697845	0.70881	0.693958	0.687503	0.69976	0.695583	0.693599	0.694597	0.702171	0.696733	0.701715	0.701582	0.70299	0.698392	0.69261	0.694932	0.688715	0.694925
1.20226	0.558518	0.575582	0.578355	0.583525	0.601123	0.598052	0.61079	0.631023	0.635868	0.635363	0.65079	0.648205	0.646795	0.660933	0.67264	0.672183	0.682527	0.678045	0.68481	0.697758	0.682863	0.676183	0.696253	0.701185	0.68486	0.690828	0.69485	0.69685	0.691375	0.699385	0.7032	0.69611	0.703523	0.716445	0.70747	0.686755	0.700185	0.698199	0.705999	0.691583	0.693555	0.695887	0.69922	0.696532	0.69734	0.69462	0.699268	0.702723	0.70268
1.09648	0.582442	0.603533	0.603835	0.623258	0.62553	0.624633	0.633432	0.655355	0.652393	0.6688	0.65351	0.654447	0.666308	0.66805	0.671952	0.674068	0.679445	0.694697	0.68979	0.687922	0.692913	0.687505	0.680037	0.697277	0.687967	0.700785	0.70121	0.69528	0.709785	0.69661	0.701695	0.699412	0.70019	0.68846	0.69933	0.704758	0.690995	0.699798	0.692197	0.692393	0.69257	0.70189	0.688828	0.687975	0.706468	0.69901	0.696187	0.69293	0.692017
1	0.61832	0.62986	0.629262	0.640352	0.637038	0.636787	0.653245	0.66309	0.667022	0.66725	0.647885	0.673588	0.674785	0.68206	0.684385	0.682987	0.683482	0.679902	0.694115	0.694118	0.68838	0.698168	0.67655	0.699858	0.693118	0.687013	0.697717	0.698315	0.711753	0.694048	0.713947	0.693133	0.692225	0.697292	0.690145	0.690377	0.70498	0.708596	0.692195	0.691778	0.70038	0.691542	0.693098	0.694063	0.701697	0.703943	0.686383	0.696958	0.701235
0.912011	0.654245	0.632465	0.639097	0.64285	0.65586	0.659635	0.665105	0.67029	0.66361	0.679395	0.68325	0.674002	0.67738	0.685815	0.69324	0.690787	0.682647	0.691305	0.70058	0.68841	0.691172	0.682658	0.694405	0.684473	0.708213	0.697305	0.697485	0.682262	0.697945	0.689948	0.712275	0.71341	0.701252	0.709345	0.71273	0.707965	0.705385	0.698598	0.7038	0.705183	0.686585	0.69014	0.699495	0.699688	0.694362	0.694292	0.697945	0.69198	0.696738
0.831764	0.656223	0.66193	0.662382	0.66649	0.672408	0.658575	0.67609	0.667003	0.664798	0.673863	0.68804	0.68452	0.681848	0.690512	0.682732	0.688163	0.690597	0.690222	0.693952	0.684318	0.7037	0.700048	0.692207	0.690468	0.685055	0.701075	0.709333	0.694873	0.70428	0.693875	0.70351	0.701805	0.706072	0.69734	0.700365	0.69859	0.696598	0.707796	0.694198	0.703987	0.698775	0.701967	0.689115	0.696087	0.695597	0.69915	0.698242	0.690647	0.696732
0.758578	0.666702	0.662713	0.684682	0.685118	0.67219	0.679978	0.688222	0.68156	0.678495	0.680787	0.68468	0.6856	0.68695	0.68477	0.686175	0.691205	0.699178	0.692348	0.690693	0.693442	0.703777	0.702277	0.686225	0.695605	0.702195	0.69696	0.693935	0.692315	0.695265	0.692488	0.706205	0.702685	0.696113	0.694738	0.70235	0.692385	0.693388	0.708	0.705798	0.695795	0.70538	0.70636	0.709545	0.710923	0.697627	0.692142	0.704525	0.695855	0.703858
0.691831	0.65636	0.687752	0.682662	0.680172	0.682122	0.673053	0.695057	0.679288	0.683682	0.693497	0.69096	0.684453	0.69118	0.69535	0.694813	0.68917	0.69252	0.697017	0.682952	0.702762	0.696682	0.698675	0.7054	0.69817	0.692575	0.69175	0.693333	0.707058	0.707932	0.699375	0.69385	0.695107	0.69714	0.696967	0.69496	0.68859	0.697998	0.700198	0.704798	0.707785	0.702368	0.69897	0.694948	0.701533	0.69965	0.701677	0.713612	0.684915	0.6938
0.630957	0.668027	0.677963	0.685555	0.681978	0.693107	0.687632	0.68577	0.69042	0.684612	0.694415	0.686937	0.68102	0.70063	0.69505	0.69522	0.69043	0.702102	0.70175	0.69279	0.710268	0.691303	0.700905	0.703072	0.69139	0.704002	0.702715	0.699355	0.695728	0.69257	0.688985	0.698667	0.70169	0.699357	0.682163	0.689565	0.689582	0.696793	0.707995	0.697995	0.6984	0.70739	0.691778	0.689342	0.703943	0.698913	0.695253	0.70243	0.692183	0.695717
0.57544	0.679723	0.685172	0.688462	0.679347	0.68448	0.703893	0.70542	0.694438	0.686867	0.697145	0.689503	0.688078	0.696697	0.692505	0.688403	0.70306	0.69009	0.698525	0.698063	0.692952	0.69481	0.698975	0.704882	0.690802	0.704512	0.69139	0.69948	0.684902	0.696632	0.709263	0.69131	0.691527	0.695775	0.696967	0.692978	0.704993	0.6956	0.693998	0.708993	0.69139	0.694793	0.70016	0.696372	0.70375	0.705515	0.705715	0.691858	0.70263	0.69477
0.524807	0.684725	0.68648	0.67629	0.683985	0.685118	0.691612	0.697538	0.69569	0.692675	0.702838	0.703355	0.69397	0.700985	0.693483	0.690433	0.700603	0.697315	0.68304	0.6987	0.690555	0.701993	0.699582	0.69781	0.703753	0.69124	0.702135	0.706152	0.690802	0.69243	0.696893	0.700928	0.699745	0.70198	0.698573	0.69598	0.70119	0.704993	0.707198	0.697	0.699998	0.698987	0.679995	0.704575	0.688157	0.70716	0.696133	0.692078	0.69446	0.684432
0.47863	0.696372	0.687585	0.691585	0.692105	0.682052	0.693075	0.68822	0.685985	0.687867	0.689288	0.69675	0.706507	0.684575	0.70373	0.69619	0.696538	0.705492	0.692612	0.69434	0.695693	0.696647	0.693688	0.693808	0.69567	0.700115	0.702795	0.69439	0.703222	0.697682	0.702725	0.706932	0.705555	0.697558	0.701985	0.695987	0.695195	0.689793	0.6992	0.7022	0.701195	0.700195	0.692192	0.705175	0.706172	0.704163	0.690515	0.694305	0.688292	0.698255
0.436516	0.68272	0.689675	0.683385	0.690438	0.696045	0.689743	0.691348	0.692627	0.69606	0.69499	0.692593	0.69482	0.6873	0.696825	0.70711	0.699275	0.696558	0.695055	0.7004	0.706477	0.701717	0.702625	0.700283	0.691298	0.691747	0.70885	0.69567	0.695695	0.70151	0.695958	0.694547	0.694972	0.70096	0.714383	0.703795	0.701993	0.694595	0.691998	0.6886	0.692392	0.6916	0.703592	0.691975	0.69297	0.691568	0.699732	0.694735	0.68788	0.696305
0.398107	0.700388	0.694837	0.688603	0.69696	0.700225	0.6971	0.692107	0.700608	0.69607	0.69106	0.705638	0.706037	0.70278	0.70105	0.697955	0.700878	0.69109	0.711718	0.705495	0.700555	0.68666	0.698725	0.68811	0.687558	0.700785	0.700865	0.699902	0.694905	0.69492	0.688155	0.69036	0.697758	0.706975	0.696383	0.700388	0.707797	0.699797	0.703195	0.690198	0.699993	0.71059	0.69079	0.694178	0.69738	0.692357	0.694538	0.69975	0.69753	0.69853
0.363078	0.699923	0.686292	0.685148	0.68983	0.698355	0.691065	0.699975	0.698202	0.712732	0.695085	0.69243	0.699688	0.697625	0.69752	0.688597	0.705885	0.692527	0.703022	0.695272	0.710078	0.701325	0.702385	0.677425	0.700237	0.697867	0.696107	0.699712	0.6957	0.69273	0.699145	0.697952	0.694972	0.69139	0.703585	0.70199	0.69979	0.6852	0.695998	0.6972	0.69399	0.685995	0.69959	0.688787	0.703963	0.703767	0.700978	0.69615	0.69894	0.704335
0.331131	0.699658	0.69199	0.691075	0.70809	0.692965	0.707385	0.704372	0.701135	0.695728	0.689015	0.69545	0.706355	0.69655	0.695415	0.696935	0.69459	0.699497	0.700105	0.69653	0.701385	0.69456	0.69297	0.69443	0.700485	0.70591	0.698717	0.685342	0.699932	0.707535	0.693568	0.70398	0.704985	0.69879	0.683192	0.70799	0.706198	0.7014	0.6998	0.7178	0.707997	0.704198	0.701388	0.695187	0.693978	0.707777	0.699767	0.70097	0.700955	0.70854
0.301995	0.703222	0.695218	0.697965	0.69533	0.702797	0.678292	0.705685	0.7034	0.69406	0.696553	0.694658	0.69771	0.695395	0.703222	0.70562	0.70087	0.694492	0.706775	0.702812	0.695423	0.697025	0.693067	0.707915	0.707692	0.697102	0.67889	0.684553	0.701547	0.693758	0.69916	0.69998	0.703388	0.70579	0.706595	0.683195	0.6994	0.6952	0.705797	0.6878	0.701797	0.696395	0.696192	0.711982	0.689785	0.689175	0.69138	0.680573	0.693157	0.705553
0.275423	0.6985	0.71021	0.690078	0.692105	0.696553	0.68026	0.687915	0.703392	0.695253	0.701315	0.68499	0.696802	0.69204	0.70608	0.694157	0.691922	0.709588	0.67682	0.70581	0.703272	0.699072	0.699085	0.696315	0.684523	0.702318	0.71132	0.698157	0.707355	0.698175	0.70738	0.704978	0.697383	0.695575	0.701788	0.70119	0.690995	0.693998	0.7042	0.6958	0.703	0.698392	0.705997	0.700395	0.687597	0.707775	0.697985	0.696565	0.69036	0.68815
0.251189	0.695725	0.682867	0.710148	0.69529	0.700585	0.703472	0.706357	0.700307	0.699605	0.693407	0.69485	0.689515	0.703557	0.69778	0.698592	0.692438	0.69742	0.697885	0.700257	0.68644	0.710725	0.70351	0.707935	0.69672	0.70134	0.712355	0.694963	0.696362	0.701978	0.691972	0.703385	0.696185	0.70079	0.696192	0.6936	0.7046	0.7066	0.689998	0.7054	0.700398	0.6928	0.689797	0.69839	0.707797	0.696392	0.698163	0.695368	0.697773	0.699582
0.229087	0.691565	0.705245	0.701078	0.695057	0.698315	0.70821	0.70416	0.696237	0.697677	0.704917	0.6983	0.70297	0.698515	0.685828	0.687203	0.704618	0.703655	0.704647	0.696708	0.703695	0.71492	0.696105	0.69474	0.69653	0.69175	0.704157	0.692967	0.699762	0.70638	0.683793	0.705383	0.700592	0.684585	0.69719	0.697198	0.702385	0.696198	0.693	0.706398	0.69899	0.701995	0.70159	0.703987	0.703183	0.701388	0.69738	0.698588	0.688365	0.693365
0.20893	0.701697	0.691922	0.6886	0.701035	0.698457	0.703252	0.703335	0.705128	0.697125	0.703375	0.691805	0.699438	0.708472	0.695063	0.701285	0.7053	0.705298	0.698315	0.7011	0.699527	0.705935	0.70156	0.688935	0.698547	0.699148	0.69857	0.695582	0.690375	0.697585	0.70419	0.704588	0.70879	0.693388	0.701592	0.700998	0.7074	0.706597	0.706398	0.695195	0.7026	0.693995	0.704597	0.703795	0.7024	0.709793	0.696785	0.69499	0.711785	0.706183
0.190546	0.698627	0.69664	0.69389	0.694503	0.710708	0.694345	0.678983	0.70137	0.691015	0.696998	0.699867	0.689863	0.690048	0.69227	0.704313	0.693497	0.704305	0.69953	0.698925	0.684735	0.70636	0.697155	0.68734	0.702973	0.695172	0.690365	0.689155	0.692775	0.702782	0.69999	0.702795	0.692383	0.694398	0.703993	0.6938	0.694795	0.707797	0.685797	0.691198	0.688198	0.685192	0.712198	0.7054	0.691192	0.698588	0.69859	0.697573	0.704388	0.698383
0.17378	0.7093	0.70491	0.69911	0.698562	0.705788	0.696372	0.701438	0.698192	0.694813	0.69545	0.702497	0.699675	0.705915	0.690315	0.678118	0.702913	0.703348	0.704917	0.69396	0.697163	0.692943	0.70296	0.688763	0.707377	0.698788	0.703982	0.706967	0.701185	0.70639	0.70059	0.695793	0.710597	0.696595	0.700195	0.685	0.702	0.6986	0.696793	0.7028	0.688597	0.692198	0.6972	0.7066	0.698192	0.70199	0.698588	0.682787	0.701785	0.701385
0.158489	0.70019	0.709398	0.692418	0.700815	0.700645	0.686855	0.699832	0.694878	0.690052	0.701887	0.69888	0.688118	0.701905	0.692305	0.698915	0.702935	0.70994	0.697732	0.695152	0.700573	0.701945	0.708375	0.707583	0.705183	0.704385	0.695785	0.699175	0.687187	0.70379	0.679385	0.699183	0.678795	0.698995	0.697595	0.704597	0.6888	0.688998	0.6974	0.694198	0.6964	0.699595	0.688395	0.702192	0.704398	0.695795	0.69859	0.693385	0.699588	0.691993
0.144544	0.68683	0.70302	0.694253	0.697682	0.698882	0.703895	0.689098	0.685697	0.706065	0.706495	0.69615	0.701738	0.704527	0.686925	0.712143	0.68974	0.685165	0.691945	0.69596	0.694967	0.695365	0.694585	0.69877	0.704765	0.699592	0.696585	0.691982	0.700185	0.706793	0.701192	0.698788	0.698597	0.709993	0.690198	0.690395	0.704998	0.6946	0.7094	0.7058	0.6942	0.684793	0.702592	0.699998	0.697195	0.699797	0.699597	0.691998	0.70879	0.698987
0.131826	0.688852	0.696063	0.684682	0.702257	0.70351	0.706133	0.694715	0.711075	0.696715	0.697732	0.697125	0.695935	0.697928	0.701955	0.697747	0.705562	0.692575	0.686965	0.695555	0.70476	0.713372	0.693175	0.692987	0.694585	0.701785	0.687978	0.696392	0.705785	0.690993	0.713392	0.702395	0.693797	0.6978	0.698998	0.710395	0.692995	0.7006	0.694198	0.7032	0.6952	0.7046	0.687397	0.691795	0.690998	0.699797	0.686198	0.706392	0.699592	0.699775
0.120226	0.692495	0.698098	0.69828	0.700492	0.691935	0.696505	0.699122	0.707745	0.715735	0.687137	0.69755	0.702322	0.69196	0.692762	0.694155	0.687763	0.69736	0.693357	0.70596	0.699388	0.698765	0.690987	0.693782	0.699588	0.698785	0.698383	0.705788	0.702388	0.69239	0.701993	0.70019	0.700993	0.696198	0.6992	0.698597	0.698398	0.710797	0.696	0.704797	0.692198	0.6954	0.708395	0.682797	0.700995	0.686998	0.697597	0.697398	0.694595	0.686987
0.109648	0.69228	0.697093	0.701135	0.69791	0.700712	0.692525	0.698327	0.69635	0.70076	0.70115	0.703152	0.690168	0.69176	0.69997	0.699553	0.713762	0.70476	0.696575	0.695573	0.693782	0.69577	0.695778	0.702778	0.693178	0.70079	0.703995	0.689582	0.693397	0.705793	0.702592	0.6972	0.69339	0.703398	0.6968	0.705	0.6862	0.707797	0.6952	0.6986	0.699	0.6956	0.694995	0.717795	0.705398	0.697592	0.695793	0.708997	0.691	0.702597
0.1	0.700322	0.701925	0.69973	0.696152	0.685937	0.69174	0.710955	0.705357	0.699558	0.703745	0.703743	0.691978	0.69776	0.704368	0.691767	0.706573	0.694377	0.702575	0.701975	0.690773	0.701985	0.690985	0.68339	0.695577	0.699585	0.689392	0.697995	0.690993	0.699998	0.68679	0.703398	0.706995	0.695	0.696998	0.6958	0.689198	0.691	0.6964	0.6974	0.686198	0.691	0.697998	0.706997	0.7062	0.713	0.689993	0.705997	0.696995	0.69719
[truncated: 2 more columns]
