# Supplementary material for: Exploiting the mediating role of the metabolome to unravel transcript-to-phenotype associations
Source: eLife. 2023 Mar 9;12:e81097. doi: 10.7554/eLife.81097 (PMC9998083; doi:10.7554/eLife.81097)
Supplement: Figure 4—figure supplement 2—source data 3. — Each cell represents the mean difference in power between TWMR and mediation analysis for a given scenario across 10 simulations. Rows reflect decreasing ratio between transcript-to-metabolite and metabolite-to-phenotype effects from 10 to 0.1 (sigma). Columns reflect increasing proportion of direct to total effect from –2 to 2 (rho). This file relates to Figure 4—figure supplement 2C. [file elife-81097-fig4-figsupp2-data3.xlsx]

## Sheet: Sheet1
sigma/direct	-2	-1.92	-1.84	-1.76	-1.68	-1.6	-1.52	-1.44	-1.36	-1.28	-1.2	-1.12	-1.04	-0.96	-0.88	-0.8	-0.72	-0.64	-0.56	-0.48	-0.4	-0.32	-0.24	-0.16	-0.08	0	0.08	0.16	0.24	0.32	0.4	0.48	0.56	0.64	0.72	0.8	0.88	0.96	1.04	1.12	1.2	1.28	1.36	1.44	1.52	1.6	1.68	1.76	1.84
10	-0.3136	-0.2966	-0.306	-0.305	-0.3012	-0.3042	-0.2972	-0.2932	-0.306	-0.3058	-0.299198	-0.3078	-0.303393	-0.293345	-0.30578	-0.291575	-0.29872	-0.29909	-0.302868	-0.297466	-0.305074	-0.294678	-0.289358	-0.297143	-0.30808	-0.268609	-0.268828	-0.25138	-0.229355	-0.172505	-0.134306	-0.0221188	0.113255	0.300444	0.497522	0.650465	0.706875	0.698986	0.701586	0.693584	0.645449	0.50897	0.332544	0.109529	-0.0388273	-0.121939	-0.180466	-0.233373	-0.248443
9.12	-0.2996	-0.2998	-0.3028	-0.2956	-0.314	-0.3084	-0.3064	-0.3132	-0.308993	-0.287592	-0.298998	-0.30139	-0.296982	-0.295577	-0.286165	-0.310925	-0.288067	-0.311385	-0.297277	-0.302615	-0.302485	-0.29556	-0.297698	-0.283845	-0.299299	-0.283859	-0.268094	-0.251519	-0.222455	-0.192026	-0.141452	-0.0131363	0.1184	0.312933	0.530984	0.649147	0.68798	0.687389	0.69419	0.684716	0.650753	0.516244	0.313891	0.138445	-0.0121016	-0.109618	-0.184971	-0.238901	-0.257933
8.32	-0.299997	-0.306	-0.294	-0.3054	-0.307798	-0.301598	-0.2998	-0.293795	-0.30239	-0.311987	-0.299582	-0.300762	-0.288115	-0.29011	-0.294272	-0.3108	-0.303695	-0.307793	-0.286771	-0.297723	-0.299887	-0.298063	-0.293957	-0.288701	-0.293558	-0.27642	-0.261409	-0.240707	-0.217969	-0.164689	-0.108718	0.00649628	0.167684	0.358928	0.552825	0.657816	0.691633	0.703387	0.704592	0.703823	0.658494	0.549142	0.359367	0.146098	-0.00813828	-0.0894698	-0.169808	-0.214618	-0.246296
7.59	-0.291197	-0.3068	-0.303598	-0.303397	-0.30279	-0.294193	-0.306195	-0.29978	-0.30537	-0.298552	-0.298127	-0.296105	-0.29885	-0.291973	-0.310675	-0.289367	-0.291627	-0.30046	-0.308322	-0.290675	-0.295117	-0.299245	-0.294262	-0.27739	-0.275296	-0.278682	-0.244925	-0.240791	-0.193144	-0.141229	-0.0692509	0.047421	0.209745	0.399502	0.562804	0.659732	0.69272	0.698793	0.691588	0.702843	0.663958	0.552102	0.386309	0.191954	0.037517	-0.0702361	-0.151073	-0.214011	-0.235595
6.92	-0.310997	-0.299997	-0.298795	-0.292985	-0.302385	-0.30578	-0.298372	-0.297152	-0.310908	-0.303277	-0.305	-0.29899	-0.300243	-0.298343	-0.306837	-0.304102	-0.303802	-0.302025	-0.308538	-0.295625	-0.29364	-0.295935	-0.283492	-0.264802	-0.275537	-0.249168	-0.247687	-0.224599	-0.172983	-0.124103	-0.0306756	0.111639	0.251568	0.44477	0.575297	0.670457	0.690608	0.702793	0.703591	0.690655	0.666992	0.566594	0.44345	0.254004	0.0891562	-0.0297623	-0.117781	-0.164972	-0.226328
6.31	-0.300385	-0.30299	-0.292988	-0.292963	-0.305765	-0.310532	-0.289112	-0.30288	-0.289618	-0.295917	-0.299557	-0.297843	-0.30852	-0.30385	-0.307858	-0.304773	-0.298872	-0.29799	-0.29919	-0.282075	-0.291293	-0.29531	-0.281977	-0.266553	-0.258929	-0.239152	-0.217043	-0.174979	-0.141136	-0.0735982	0.0390948	0.161541	0.325853	0.464057	0.594053	0.666215	0.701243	0.691995	0.690388	0.696586	0.681559	0.616647	0.481548	0.312051	0.165503	0.0419095	-0.0573352	-0.136422	-0.190389
5.75	-0.303362	-0.298322	-0.300708	-0.30188	-0.309408	-0.293007	-0.290357	-0.303407	-0.29666	-0.297953	-0.301762	-0.2982	-0.295878	-0.297573	-0.28673	-0.29121	-0.297455	-0.30572	-0.289605	-0.290148	-0.2936	-0.259068	-0.264545	-0.252345	-0.23476	-0.216723	-0.187067	-0.136518	-0.0826251	-0.011139	0.122932	0.235161	0.379153	0.513655	0.619784	0.672998	0.693356	0.701394	0.695192	0.689468	0.680751	0.613465	0.515069	0.366119	0.224521	0.103156	0.00511356	-0.0745607	-0.147365
5.25	-0.298675	-0.303658	-0.298588	-0.308675	-0.299978	-0.29931	-0.299513	-0.297102	-0.310018	-0.298255	-0.290033	-0.301485	-0.297677	-0.298718	-0.30467	-0.29834	-0.28532	-0.292963	-0.288665	-0.284983	-0.262852	-0.259257	-0.246117	-0.222915	-0.19868	-0.176865	-0.13387	-0.0885325	-0.0215038	0.0707825	0.188942	0.300778	0.431516	0.546735	0.625678	0.680407	0.691749	0.692393	0.703992	0.683416	0.679535	0.631684	0.537372	0.427357	0.304169	0.174152	0.0671056	-0.0159575	-0.0921908
4.79	-0.28989	-0.307822	-0.299887	-0.299507	-0.305275	-0.307375	-0.303528	-0.297385	-0.300023	-0.30041	-0.292903	-0.296113	-0.303362	-0.296853	-0.282938	-0.287075	-0.286913	-0.287703	-0.285112	-0.26784	-0.267807	-0.237388	-0.219512	-0.207665	-0.184355	-0.142315	-0.09594	-0.0270025	0.06243	0.155555	0.258887	0.369602	0.479872	0.575172	0.640897	0.694725	0.710902	0.704396	0.697595	0.695896	0.688432	0.65548	0.574183	0.483394	0.36291	0.255974	0.151635	0.0488379	-0.0163991
4.37	-0.309503	-0.31595	-0.30609	-0.298095	-0.307573	-0.300283	-0.306578	-0.298727	-0.285685	-0.307383	-0.286235	-0.307935	-0.288467	-0.292285	-0.292225	-0.277505	-0.274572	-0.259435	-0.257645	-0.25068	-0.237515	-0.217697	-0.181675	-0.173942	-0.121015	-0.0863043	-0.035465	0.03826	0.131792	0.226285	0.325787	0.434408	0.529966	0.610027	0.663517	0.692566	0.702053	0.702995	0.695993	0.695109	0.69178	0.650529	0.599971	0.534908	0.432955	0.325944	0.228142	0.131245	0.0368225
3.98	-0.29641	-0.303912	-0.291115	-0.3041	-0.298	-0.285	-0.299692	-0.278807	-0.299258	-0.28665	-0.2785	-0.289672	-0.285745	-0.273185	-0.265473	-0.277087	-0.262317	-0.238593	-0.233937	-0.225285	-0.199953	-0.17915	-0.132582	-0.12252	-0.0683025	-0.024675	0.055195	0.121932	0.206334	0.311526	0.413353	0.488098	0.565353	0.610432	0.66825	0.695322	0.703509	0.699194	0.704795	0.698938	0.692089	0.671979	0.636824	0.562332	0.48944	0.390037	0.301362	0.213198	0.121163
3.63	-0.301812	-0.311547	-0.295293	-0.274168	-0.299975	-0.285915	-0.289077	-0.28264	-0.286865	-0.286087	-0.28389	-0.273765	-0.269247	-0.262873	-0.244677	-0.255657	-0.245055	-0.218057	-0.199745	-0.18703	-0.164055	-0.13665	-0.1126	-0.06241	-0.01051	0.0558775	0.118525	0.197453	0.289747	0.375978	0.449825	0.538885	0.598629	0.650003	0.688663	0.703637	0.702859	0.686993	0.693993	0.692067	0.70283	0.677296	0.636632	0.604842	0.531392	0.473145	0.37501	0.275278	0.210205
3.31	-0.294878	-0.301853	-0.289065	-0.28908	-0.296418	-0.28518	-0.278805	-0.29123	-0.279065	-0.277715	-0.26017	-0.26349	-0.268072	-0.247215	-0.234442	-0.228745	-0.210347	-0.187213	-0.170805	-0.15141	-0.12158	-0.07938	-0.039585	0.0094125	0.0755	0.133142	0.201435	0.277938	0.360637	0.43599	0.502082	0.574565	0.638435	0.638635	0.676291	0.6998	0.703637	0.707992	0.691391	0.687383	0.702385	0.684461	0.659689	0.623965	0.561797	0.512347	0.430916	0.361847	0.282187
3.02	-0.298162	-0.295347	-0.286577	-0.288208	-0.295882	-0.272842	-0.2739	-0.27055	-0.2653	-0.257607	-0.249142	-0.250202	-0.234077	-0.23207	-0.215973	-0.189635	-0.177468	-0.152652	-0.130238	-0.0996475	-0.058625	-0.0148925	0.0337	0.0805075	0.137572	0.210328	0.2814	0.360388	0.423667	0.49239	0.558898	0.59718	0.636635	0.665192	0.693362	0.705607	0.69923	0.700593	0.702796	0.685541	0.693711	0.67748	0.676229	0.644444	0.607016	0.563388	0.497198	0.427305	0.35361
2.75	-0.279508	-0.281722	-0.28279	-0.273245	-0.271565	-0.264253	-0.256945	-0.2573	-0.23698	-0.235365	-0.22731	-0.214393	-0.20652	-0.197302	-0.173937	-0.157372	-0.131895	-0.100515	-0.0696	-0.0343575	0.0145375	0.04495	0.0968725	0.162282	0.220812	0.292913	0.357378	0.415228	0.479585	0.540188	0.590158	0.631228	0.665197	0.687548	0.684601	0.690195	0.701391	0.694394	0.702593	0.6916	0.706202	0.68085	0.679646	0.652185	0.627935	0.59959	0.535813	0.481475	0.417005
2.51	-0.277775	-0.267832	-0.265817	-0.261885	-0.246188	-0.2469	-0.244567	-0.235778	-0.22232	-0.20935	-0.200795	-0.186015	-0.163293	-0.150135	-0.137162	-0.106612	-0.0702425	-0.0438325	0.0019725	0.04401	0.08537	0.128268	0.17708	0.25241	0.30863	0.358137	0.420325	0.486905	0.534648	0.56308	0.62402	0.638637	0.66193	0.676077	0.695655	0.699811	0.701227	0.699195	0.712595	0.696881	0.695166	0.697241	0.686299	0.673543	0.659	0.624785	0.575932	0.532902	0.475363
2.29	-0.249573	-0.262443	-0.241773	-0.247142	-0.23493	-0.219968	-0.204792	-0.202978	-0.197107	-0.184278	-0.161125	-0.14146	-0.1225	-0.116865	-0.0629325	-0.0445225	-0.0158175	0.031155	0.075085	0.126905	0.162458	0.200115	0.260418	0.318922	0.370777	0.429737	0.47372	0.528175	0.58353	0.60332	0.634162	0.656092	0.674663	0.692487	0.68948	0.700827	0.698361	0.708595	0.707194	0.703956	0.707279	0.698589	0.678863	0.6755	0.666085	0.632212	0.60839	0.571562	0.520602
2.09	-0.23666	-0.248525	-0.223735	-0.216973	-0.207657	-0.182523	-0.180193	-0.170733	-0.152975	-0.146283	-0.102013	-0.0888675	-0.0719825	-0.04303	-0.007615	0.0202275	0.070015	0.109798	0.142945	0.20115	0.251267	0.285438	0.338498	0.381368	0.43487	0.48932	0.531767	0.569202	0.59523	0.616807	0.64922	0.67849	0.686155	0.686418	0.682656	0.685412	0.697547	0.696794	0.694392	0.696202	0.696624	0.693277	0.682975	0.682481	0.67315	0.652315	0.631108	0.593342	0.563817
1.91	-0.220472	-0.207723	-0.18661	-0.173847	-0.171407	-0.147542	-0.14496	-0.118	-0.100275	-0.0827575	-0.0471225	-0.0204675	-0.003635	0.043735	0.0704125	0.10818	0.13225	0.197715	0.228417	0.282183	0.306208	0.368102	0.410083	0.450045	0.482457	0.541455	0.569205	0.598123	0.635725	0.642035	0.670432	0.677055	0.693462	0.689213	0.697521	0.700682	0.692451	0.692597	0.699996	0.694229	0.704147	0.689979	0.694142	0.683305	0.680635	0.657393	0.647748	0.62841	0.612947
1.74	-0.181943	-0.15571	-0.15415	-0.130598	-0.126395	-0.10031	-0.0855775	-0.0631025	-0.04329	-0.0217825	0.0200975	0.04116	0.0725275	0.10579	0.139442	0.185647	0.220195	0.257267	0.312368	0.343303	0.38399	0.429305	0.476087	0.5104	0.545512	0.575533	0.591093	0.621865	0.642905	0.670623	0.663685	0.673423	0.69265	0.690078	0.691058	0.698545	0.705445	0.692995	0.692592	0.70125	0.700215	0.697612	0.688655	0.702638	0.67648	0.674825	0.66244	0.646273	0.614605
1.58	-0.124397	-0.118352	-0.103782	-0.081585	-0.0608525	-0.0431425	-0.01265	0.0097175	0.024895	0.05727	0.0894425	0.120695	0.153505	0.197662	0.226398	0.25165	0.293573	0.337068	0.3771	0.411725	0.446997	0.48303	0.52368	0.542327	0.583395	0.609393	0.629077	0.643565	0.666055	0.655315	0.687717	0.69598	0.689207	0.692102	0.692205	0.6927	0.700098	0.702396	0.697196	0.70207	0.699493	0.699455	0.69938	0.688593	0.682795	0.675678	0.659597	0.663813	0.636493
1.45	-0.0761125	-0.0533025	-0.040385	-0.0208125	0.003175	0.028725	0.05347	0.079975	0.100785	0.131422	0.165385	0.198153	0.243863	0.262975	0.31175	0.350847	0.367173	0.400805	0.442317	0.463955	0.50844	0.538467	0.562362	0.593237	0.619467	0.625138	0.647567	0.645537	0.67783	0.68095	0.686135	0.681978	0.688213	0.693115	0.694233	0.702236	0.703086	0.707995	0.693791	0.699506	0.701196	0.701782	0.698327	0.687987	0.68701	0.69054	0.67914	0.659807	0.663432
1.32	-0.00644	0.0116775	0.03742	0.053265	0.0754	0.105127	0.128395	0.162722	0.186812	0.218658	0.248963	0.28211	0.309518	0.348925	0.377937	0.40642	0.43015	0.464328	0.500853	0.524423	0.545512	0.57013	0.585295	0.604572	0.617513	0.655138	0.657515	0.66459	0.68097	0.68002	0.68949	0.698975	0.694608	0.69213	0.693065	0.69813	0.698314	0.7046	0.698996	0.697513	0.697527	0.69195	0.682255	0.696235	0.681305	0.693922	0.684285	0.6875	0.67205
1.2	0.0652875	0.0966475	0.113912	0.136903	0.154138	0.1947	0.210992	0.234382	0.278587	0.29063	0.324575	0.363833	0.386047	0.412768	0.434522	0.45865	0.483205	0.517125	0.537698	0.565948	0.58115	0.600765	0.623865	0.631698	0.651728	0.67228	0.66191	0.678157	0.681392	0.694945	0.695187	0.701037	0.702823	0.69851	0.689187	0.708958	0.710734	0.699793	0.698796	0.692134	0.69199	0.699407	0.691075	0.702222	0.690538	0.706115	0.688145	0.688558	0.681872
1.1	0.148602	0.167183	0.192135	0.21417	0.237665	0.26519	0.294832	0.309163	0.322817	0.367585	0.39375	0.402795	0.44703	0.458095	0.503335	0.517382	0.537195	0.551647	0.582975	0.594958	0.616265	0.618733	0.629262	0.644683	0.651948	0.658585	0.682445	0.677608	0.678423	0.692442	0.698043	0.700723	0.70198	0.69548	0.699585	0.692825	0.686558	0.691789	0.697392	0.703318	0.689015	0.694917	0.703765	0.706565	0.694295	0.66542	0.686555	0.681545	0.683135
1	0.204785	0.244393	0.256165	0.295917	0.321375	0.33865	0.3635	0.384613	0.407675	0.437758	0.450465	0.470473	0.491372	0.516127	0.538793	0.557327	0.574832	0.596097	0.612865	0.622648	0.63404	0.628027	0.657377	0.666085	0.664482	0.67593	0.674338	0.68491	0.69464	0.702185	0.68978	0.694202	0.701913	0.706928	0.69843	0.691658	0.706958	0.694793	0.693998	0.70216	0.704065	0.698453	0.704072	0.69894	0.678975	0.689612	0.691065	0.692588	0.681137
0.91	0.291033	0.311978	0.34146	0.365555	0.381175	0.410612	0.42837	0.443763	0.457398	0.487545	0.502255	0.515012	0.5397	0.56866	0.574535	0.59894	0.604152	0.623025	0.627897	0.642705	0.64293	0.665595	0.660628	0.676778	0.68846	0.68758	0.689738	0.692245	0.687943	0.698475	0.694195	0.706685	0.699345	0.693645	0.695338	0.70068	0.70335	0.694794	0.693396	0.700375	0.692503	0.695122	0.700287	0.70537	0.697775	0.702618	0.69137	0.685928	0.68063
0.83	0.3584	0.387188	0.40692	0.420005	0.433107	0.46472	0.480158	0.495432	0.510947	0.537833	0.549092	0.56453	0.586982	0.61309	0.60039	0.607428	0.632842	0.638082	0.643038	0.659303	0.661715	0.674403	0.667687	0.68009	0.682405	0.70623	0.689475	0.681262	0.701623	0.689083	0.702398	0.696963	0.691823	0.6978	0.693998	0.70688	0.70217	0.697396	0.696996	0.70377	0.699695	0.694965	0.701005	0.703632	0.699122	0.6878	0.694735	0.701248	0.70482
0.76	0.43497	0.458052	0.452205	0.479652	0.50509	0.52223	0.537218	0.542277	0.555115	0.570937	0.578425	0.593873	0.603307	0.625748	0.634295	0.641007	0.64576	0.64992	0.66281	0.653587	0.66221	0.669183	0.683438	0.675835	0.687022	0.690955	0.688983	0.682752	0.689673	0.701595	0.700143	0.699052	0.710685	0.69984	0.685623	0.697315	0.69397	0.701598	0.698396	0.687562	0.709928	0.698847	0.69012	0.69419	0.699603	0.698025	0.692205	0.702565	0.70328
0.69	0.490683	0.505428	0.514728	0.52693	0.54162	0.56104	0.5689	0.59294	0.594785	0.60063	0.62914	0.627372	0.627437	0.64014	0.644208	0.655547	0.664745	0.667732	0.669375	0.673608	0.684033	0.674605	0.687033	0.674917	0.690987	0.695905	0.69983	0.69653	0.690445	0.698685	0.69408	0.684	0.707553	0.700553	0.686867	0.70253	0.706385	0.690198	0.6928	0.70398	0.705167	0.684065	0.694738	0.682365	0.690847	0.69282	0.70555	0.690505	0.691785
0.63	0.536737	0.543992	0.556155	0.571473	0.5804	0.579815	0.611428	0.60966	0.61626	0.625502	0.626637	0.641572	0.64995	0.653138	0.661215	0.663258	0.66918	0.681925	0.676845	0.667493	0.694855	0.6869	0.684503	0.696445	0.682998	0.692342	0.690717	0.697965	0.70052	0.69702	0.704967	0.709222	0.697048	0.692423	0.696063	0.696342	0.700582	0.6984	0.703393	0.696187	0.697365	0.69569	0.695812	0.694495	0.697272	0.696965	0.70096	0.698588	0.702688
0.58	0.576163	0.59585	0.59656	0.601542	0.623605	0.625003	0.61413	0.637332	0.63918	0.637097	0.654792	0.66222	0.654617	0.66738	0.664262	0.66758	0.691087	0.68867	0.68335	0.68243	0.687963	0.69806	0.684723	0.69255	0.695993	0.707915	0.705993	0.693492	0.696618	0.69906	0.705703	0.689963	0.69771	0.68628	0.69492	0.705545	0.702975	0.694	0.7102	0.710777	0.70116	0.69892	0.69845	0.688527	0.697205	0.687338	0.690708	0.700263	0.69073
0.52	0.606698	0.621322	0.619355	0.630727	0.651963	0.63343	0.639332	0.639835	0.64615	0.659953	0.646493	0.653535	0.67075	0.676065	0.688763	0.67556	0.683543	0.686913	0.688627	0.693863	0.684118	0.69459	0.6854	0.704765	0.690762	0.699758	0.68856	0.700268	0.692805	0.69022	0.694677	0.697647	0.686605	0.693093	0.699743	0.687577	0.692392	0.707198	0.6986	0.71158	0.70336	0.695335	0.70849	0.69682	0.701287	0.7031	0.702477	0.694205	0.70557
0.48	0.622498	0.641005	0.638415	0.635985	0.65053	0.655598	0.651393	0.676207	0.670905	0.665965	0.675875	0.686508	0.67608	0.675948	0.68584	0.679508	0.700075	0.693597	0.69039	0.706365	0.708117	0.691392	0.699653	0.693897	0.693148	0.68526	0.696345	0.7017	0.69622	0.68923	0.696435	0.702745	0.698407	0.702093	0.693342	0.69477	0.69458	0.698198	0.701795	0.69479	0.706152	0.70054	0.695715	0.699838	0.699743	0.687447	0.690795	0.702043	0.69129
0.44	0.65152	0.648745	0.645628	0.669295	0.661473	0.660227	0.666805	0.67196	0.670508	0.672045	0.686975	0.68806	0.6907	0.679582	0.706218	0.68085	0.689412	0.69187	0.697612	0.68894	0.693585	0.695902	0.698477	0.686368	0.695965	0.687312	0.69478	0.714882	0.692427	0.705207	0.708115	0.70121	0.716488	0.696708	0.69595	0.693985	0.697588	0.6882	0.699593	0.699993	0.707575	0.704345	0.697333	0.70269	0.689433	0.69194	0.708925	0.704843	0.711472
0.4	0.646942	0.677558	0.662478	0.66999	0.670377	0.685187	0.677042	0.679782	0.68374	0.68759	0.682517	0.680745	0.686763	0.687652	0.685525	0.68063	0.702515	0.696245	0.695982	0.695102	0.695183	0.678268	0.704635	0.704895	0.693263	0.693195	0.69535	0.707233	0.7006	0.697503	0.694612	0.692603	0.698285	0.699137	0.699368	0.70417	0.693985	0.679798	0.7042	0.706392	0.698377	0.692767	0.695338	0.697113	0.693673	0.710178	0.700638	0.69117	0.700002
0.36	0.66145	0.66087	0.670532	0.6748	0.690828	0.676695	0.68092	0.67618	0.690975	0.687852	0.67556	0.71166	0.697113	0.698122	0.697172	0.681415	0.70183	0.70706	0.697612	0.70501	0.693793	0.70762	0.698405	0.70538	0.69467	0.6911	0.696005	0.699985	0.701272	0.699545	0.686377	0.69747	0.701917	0.692538	0.702363	0.698383	0.7006	0.701	0.708195	0.702795	0.70679	0.694377	0.707767	0.694908	0.701085	0.697837	0.700152	0.695638	0.692168
0.33	0.674007	0.68634	0.67949	0.693007	0.682482	0.690482	0.684638	0.689403	0.68386	0.692025	0.689	0.686963	0.704635	0.688817	0.695002	0.69788	0.68755	0.70107	0.690773	0.690098	0.695832	0.69505	0.691095	0.68595	0.705218	0.693645	0.701982	0.697675	0.698333	0.69099	0.701658	0.692505	0.693148	0.698785	0.697762	0.706588	0.6846	0.705	0.699798	0.700588	0.69418	0.70357	0.691338	0.69812	0.694107	0.692655	0.714768	0.703525	0.682715
0.3	0.689805	0.68793	0.696612	0.68895	0.695932	0.690758	0.69187	0.694303	0.698773	0.700835	0.69744	0.690468	0.692002	0.695723	0.69762	0.689427	0.690865	0.686523	0.69515	0.6804	0.69666	0.692627	0.696375	0.69232	0.69585	0.694128	0.698078	0.688303	0.699802	0.695828	0.700095	0.695527	0.696355	0.695773	0.69296	0.697782	0.68999	0.7008	0.6834	0.702797	0.697392	0.704773	0.70236	0.70413	0.699325	0.69625	0.69121	0.711413	0.69297
0.28	0.69971	0.69475	0.683843	0.689632	0.69829	0.687767	0.682163	0.6992	0.697115	0.694348	0.68612	0.68397	0.699035	0.682333	0.698797	0.701005	0.69389	0.693928	0.691945	0.695847	0.697747	0.709495	0.698965	0.695052	0.703963	0.695233	0.69774	0.695767	0.691462	0.69746	0.702913	0.69395	0.681955	0.68977	0.683377	0.710187	0.694192	0.7088	0.698995	0.700392	0.696588	0.699982	0.706375	0.703932	0.698545	0.702902	0.695303	0.688445	0.685373
0.25	0.691473	0.69363	0.694955	0.685845	0.697048	0.686388	0.6989	0.690022	0.699462	0.688667	0.695765	0.704843	0.701035	0.68838	0.701008	0.695512	0.705832	0.690813	0.693445	0.700575	0.686235	0.69381	0.691943	0.698185	0.706488	0.71296	0.693385	0.69744	0.704272	0.69093	0.698325	0.700553	0.695157	0.696163	0.700582	0.687588	0.707797	0.6936	0.703195	0.688998	0.701395	0.698582	0.701967	0.694773	0.700533	0.696745	0.703492	0.700843	0.697242
0.23	0.683092	0.69778	0.70309	0.69026	0.696873	0.687743	0.697893	0.69962	0.699357	0.698202	0.681345	0.69994	0.707912	0.692695	0.704512	0.694072	0.707803	0.699175	0.698852	0.702778	0.690702	0.691955	0.697207	0.685288	0.686347	0.693588	0.695835	0.703105	0.696305	0.70132	0.698935	0.695943	0.708575	0.703973	0.697183	0.69759	0.713793	0.685797	0.7056	0.7054	0.695595	0.691582	0.700187	0.711348	0.69456	0.69015	0.697913	0.69452	0.685063
0.21	0.692905	0.6916	0.701778	0.693732	0.6927	0.688693	0.704882	0.69459	0.69557	0.702207	0.694033	0.690835	0.704462	0.69772	0.692675	0.697488	0.70341	0.702192	0.69421	0.705905	0.69796	0.69583	0.71174	0.70338	0.70083	0.710655	0.703878	0.6937	0.707538	0.704928	0.694965	0.70498	0.695978	0.694392	0.698782	0.687395	0.701998	0.688998	0.7084	0.704198	0.685797	0.703582	0.701392	0.69478	0.693978	0.691155	0.706533	0.691515	0.70691
0.19	0.682495	0.69861	0.693475	0.684155	0.692488	0.6924	0.68938	0.691005	0.69893	0.708228	0.710845	0.70195	0.69632	0.693645	0.697075	0.698327	0.699	0.69851	0.686388	0.694867	0.697697	0.700538	0.705313	0.698612	0.6934	0.691873	0.695287	0.68692	0.697137	0.70175	0.70756	0.708568	0.69937	0.706995	0.68859	0.698383	0.69399	0.701998	0.705198	0.7032	0.700592	0.707997	0.69459	0.681385	0.70078	0.705355	0.697372	0.694937	0.703335
0.17	0.69599	0.6886	0.692765	0.695407	0.69789	0.697538	0.703483	0.700867	0.703468	0.684177	0.701958	0.694423	0.696318	0.698562	0.704175	0.68993	0.704995	0.696033	0.70188	0.70498	0.701542	0.700817	0.69804	0.68981	0.71007	0.68532	0.69351	0.70152	0.697553	0.692338	0.699975	0.69778	0.702785	0.690383	0.705782	0.70039	0.689998	0.708995	0.6926	0.699198	0.7038	0.706795	0.695592	0.704372	0.684582	0.69877	0.694565	0.700143	0.70094
0.16	0.69935	0.697422	0.700677	0.694705	0.705843	0.68415	0.69401	0.69246	0.708642	0.700398	0.706075	0.699168	0.69796	0.705555	0.70034	0.690653	0.709708	0.701488	0.696568	0.685763	0.686407	0.689255	0.69827	0.6997	0.694913	0.696905	0.704923	0.705372	0.70654	0.699165	0.702982	0.69459	0.693978	0.701595	0.69	0.695198	0.699597	0.685195	0.695597	0.701597	0.69919	0.703987	0.692993	0.70058	0.703183	0.686987	0.691967	0.705377	0.697958
0.14	0.696087	0.696635	0.691067	0.703723	0.706022	0.6886	0.70561	0.683327	0.702785	0.690048	0.698667	0.688002	0.70137	0.69085	0.697908	0.695465	0.704363	0.705415	0.701045	0.706662	0.699662	0.705492	0.694107	0.707695	0.696333	0.702747	0.69554	0.67797	0.71257	0.69817	0.706183	0.702795	0.70499	0.705785	0.707387	0.692998	0.7024	0.702987	0.7034	0.6994	0.689787	0.697592	0.694192	0.68499	0.704377	0.69838	0.684365	0.712767	0.700765
0.13	0.711055	0.703032	0.699275	0.701465	0.689368	0.694717	0.692785	0.692303	0.689068	0.702523	0.691785	0.695815	0.696055	0.704908	0.700705	0.693592	0.706375	0.698207	0.696462	0.69787	0.692882	0.709915	0.7019	0.694118	0.699755	0.70753	0.70376	0.706363	0.703582	0.700183	0.69619	0.686975	0.697388	0.6992	0.689998	0.6832	0.696398	0.6974	0.6892	0.695797	0.697395	0.7014	0.705597	0.689972	0.695195	0.677778	0.701375	0.683767	0.700568
0.12	0.695303	0.69954	0.706618	0.696592	0.68867	0.69589	0.69635	0.707982	0.70504	0.697858	0.699492	0.695725	0.702967	0.693187	0.695403	0.69525	0.704828	0.699052	0.68487	0.706705	0.70751	0.691145	0.70292	0.700747	0.682943	0.706167	0.69297	0.700782	0.69198	0.70098	0.70558	0.69398	0.70038	0.708387	0.70579	0.693595	0.6926	0.7016	0.6954	0.695595	0.696398	0.696597	0.693195	0.704993	0.693385	0.710985	0.705973	0.701165	0.698362
0.11	0.70504	0.692355	0.690107	0.703973	0.703685	0.703885	0.7015	0.704682	0.701483	0.699752	0.701192	0.692797	0.6918	0.686665	0.706248	0.699677	0.701067	0.698483	0.677325	0.690105	0.695712	0.691315	0.690758	0.702963	0.695758	0.700547	0.695377	0.694362	0.69859	0.709383	0.70699	0.693793	0.686385	0.699195	0.697995	0.704592	0.6948	0.697797	0.7044	0.697797	0.693392	0.701797	0.691385	0.708597	0.69438	0.705383	0.69918	0.696372	0.702982
0.1	0.69437	0.68959	0.696823	0.700248	0.696497	0.695065	0.701168	0.685732	0.695735	0.6996	0.699662	0.691237	0.696263	0.703497	0.69887	0.682705	0.70369	0.689105	0.70352	0.69571	0.680538	0.703342	0.693565	0.703745	0.700978	0.698778	0.694785	0.700995	0.694183	0.698993	0.701192	0.706193	0.70119	0.694795	0.70899	0.692	0.705	0.7026	0.7044	0.7004	0.7012	0.697395	0.701795	0.695398	0.699388	0.696187	0.693192	0.697577	0.688575
[truncated: 2 more columns]
