# Supplementary material for: Exploiting the mediating role of the metabolome to unravel transcript-to-phenotype associations
Source: eLife. 2023 Mar 9;12:e81097. doi: 10.7554/eLife.81097 (PMC9998083; doi:10.7554/eLife.81097)
Supplement: Figure 4—source data 1. — Each cell represents the mean difference in power between TWMR and mediation analysis for a given scenario across 10 simulations. Rows reflect decreasing ratio between transcript-to-metabolite and metabolite-to-phenotype effects from 10 to 0.1 (sigma). Columns reflect increasing proportion of direct to total effect from –2 to 2 (rho). This file relates to Figure 4A. [file elife-81097-fig4-data1.xlsx]

## Sheet: Sheet1
sigma/direct	-2	-1.92	-1.84	-1.76	-1.68	-1.6	-1.52	-1.44	-1.36	-1.28	-1.2	-1.12	-1.04	-0.96	-0.88	-0.8	-0.72	-0.64	-0.56	-0.48	-0.4	-0.32	-0.24	-0.16	-0.08	0	0.08	0.16	0.24	0.32	0.4	0.48	0.56	0.64	0.72	0.8	0.88	0.96	1.04	1.12	1.2	1.28	1.36	1.44	1.52	1.6	1.68	1.76	1.84
10	-0.3056	-0.2934	-0.3098	-0.3194	-0.3038	-0.294	-0.3026	-0.3064	-0.31	-0.3004	-0.303	-0.3046	-0.30495	-0.2982	-0.2938	-0.3036	-0.3012	-0.2986	-0.29515	-0.28645	-0.28935	-0.29355	-0.29925	-0.28915	-0.298098	-0.288648	-0.291373	-0.261547	-0.266026	-0.239489	-0.19801	-0.127253	-0.0166827	0.102657	0.298996	0.527791	0.669545	0.70023	0.693655	0.660249	0.498435	0.282299	0.127776	-0.0202316	-0.109144	-0.179585	-0.225537	-0.250424	-0.268261
9.12011	-0.2878	-0.2986	-0.2976	-0.2952	-0.3066	-0.2988	-0.2894	-0.298	-0.3078	-0.2978	-0.298	-0.2954	-0.302	-0.3104	-0.30195	-0.2992	-0.30135	-0.30175	-0.30715	-0.29275	-0.2994	-0.29945	-0.30655	-0.293493	-0.28969	-0.289716	-0.287901	-0.302595	-0.277154	-0.235689	-0.222483	-0.151514	-0.0675626	0.0707865	0.251489	0.53391	0.670295	0.703269	0.689509	0.670558	0.485894	0.245356	0.0788672	-0.0584345	-0.16301	-0.214667	-0.239342	-0.256978	-0.277553
8.31764	-0.3016	-0.2906	-0.3062	-0.2904	-0.301	-0.302	-0.2936	-0.3044	-0.2994	-0.3084	-0.3166	-0.2962	-0.2872	-0.311	-0.304	-0.2982	-0.3082	-0.2986	-0.3096	-0.3164	-0.306397	-0.299995	-0.3068	-0.303095	-0.29543	-0.29143	-0.291352	-0.283861	-0.273637	-0.252625	-0.232196	-0.178447	-0.112443	0.0494238	0.246569	0.49184	0.674065	0.698482	0.705102	0.670964	0.499045	0.220509	0.0308611	-0.138768	-0.206387	-0.222677	-0.274644	-0.274762	-0.296532
7.58578	-0.303	-0.3046	-0.3048	-0.3008	-0.3036	-0.3012	-0.3102	-0.3042	-0.3036	-0.3114	-0.3018	-0.3004	-0.3064	-0.3072	-0.3056	-0.2892	-0.2992	-0.2962	-0.297	-0.3062	-0.30735	-0.29199	-0.307142	-0.292863	-0.303305	-0.304578	-0.292854	-0.306041	-0.285496	-0.270638	-0.233655	-0.223305	-0.134042	-0.00556341	0.227428	0.511496	0.67006	0.687733	0.695706	0.671432	0.484806	0.211007	0.00923184	-0.124665	-0.189134	-0.247163	-0.283982	-0.279683	-0.284236
6.91831	-0.2966	-0.2986	-0.3022	-0.3044	-0.3038	-0.2976	-0.3034	-0.297	-0.3106	-0.302	-0.2972	-0.2956	-0.3018	-0.2938	-0.3054	-0.2932	-0.2954	-0.303	-0.2922	-0.302995	-0.305387	-0.296778	-0.30336	-0.31231	-0.3036	-0.298224	-0.293544	-0.296853	-0.300969	-0.277211	-0.252986	-0.216509	-0.140996	-0.0172933	0.24019	0.470564	0.672021	0.702942	0.68955	0.680491	0.505822	0.202283	-0.00959075	-0.129749	-0.212106	-0.247548	-0.272515	-0.289788	-0.291522
6.30957	-0.2962	-0.2978	-0.3008	-0.3008	-0.2982	-0.3012	-0.3062	-0.2966	-0.3134	-0.2952	-0.3048	-0.3094	-0.2918	-0.318798	-0.3026	-0.3072	-0.3086	-0.3046	-0.299598	-0.303785	-0.303963	-0.30692	-0.291853	-0.300345	-0.304118	-0.308827	-0.306535	-0.297979	-0.290474	-0.282597	-0.258411	-0.223751	-0.137944	0.00511253	0.228731	0.53354	0.679146	0.692745	0.702957	0.680788	0.508151	0.241134	0.00986322	-0.135884	-0.211867	-0.252607	-0.277569	-0.28652	-0.29546
5.7544	-0.302	-0.304	-0.2932	-0.3034	-0.3024	-0.3006	-0.3092	-0.2924	-0.2936	-0.2898	-0.295	-0.3034	-0.2992	-0.3074	-0.3094	-0.297198	-0.300192	-0.294185	-0.300783	-0.305347	-0.29192	-0.2992	-0.293042	-0.303438	-0.305705	-0.290897	-0.290038	-0.293029	-0.282674	-0.274123	-0.238796	-0.209453	-0.117713	0.012827	0.274173	0.53126	0.6815	0.68893	0.705947	0.683096	0.524562	0.267802	0.0407638	-0.115725	-0.202215	-0.248743	-0.280238	-0.297128	-0.294017
5.24807	-0.3082	-0.3022	-0.2998	-0.3018	-0.2992	-0.299	-0.3	-0.3034	-0.2876	-0.3066	-0.292	-0.2988	-0.292797	-0.3018	-0.308395	-0.308588	-0.29778	-0.31236	-0.305733	-0.297637	-0.297963	-0.299935	-0.302645	-0.296365	-0.29595	-0.299438	-0.293923	-0.284045	-0.286492	-0.256848	-0.227451	-0.17938	-0.089322	0.0870564	0.315474	0.558279	0.682911	0.683961	0.703348	0.692604	0.557843	0.31771	0.0615475	-0.0822496	-0.207225	-0.2449	-0.266416	-0.276945	-0.294642
4.7863	-0.3044	-0.295	-0.2962	-0.3128	-0.3092	-0.308	-0.3058	-0.309	-0.296	-0.303198	-0.322798	-0.310595	-0.315387	-0.296185	-0.299372	-0.30157	-0.301517	-0.305302	-0.303802	-0.287815	-0.30635	-0.297855	-0.29667	-0.29019	-0.292652	-0.295032	-0.292127	-0.272547	-0.26484	-0.239986	-0.21335	-0.14363	-0.0450836	0.144706	0.352834	0.587434	0.68016	0.69776	0.690354	0.694025	0.575271	0.366082	0.140937	-0.0550279	-0.143968	-0.204436	-0.255757	-0.253996	-0.28037
4.36516	-0.2996	-0.2984	-0.3124	-0.300997	-0.3084	-0.2902	-0.2982	-0.299793	-0.310993	-0.309592	-0.300795	-0.29958	-0.293575	-0.310352	-0.299735	-0.293863	-0.299223	-0.304853	-0.303187	-0.302687	-0.296888	-0.29707	-0.302395	-0.292602	-0.290917	-0.288045	-0.280268	-0.272157	-0.253518	-0.210994	-0.171941	-0.0975526	0.017712	0.199994	0.405582	0.598353	0.686272	0.703566	0.696357	0.686482	0.600399	0.406441	0.184287	0.0120557	-0.101599	-0.190066	-0.22913	-0.253132	-0.258935
3.98107	-0.300598	-0.2966	-0.317597	-0.3106	-0.310598	-0.300592	-0.302795	-0.292592	-0.305793	-0.295985	-0.305358	-0.310545	-0.298495	-0.291268	-0.310603	-0.292702	-0.30194	-0.305227	-0.306615	-0.295535	-0.297705	-0.30288	-0.296685	-0.293193	-0.300333	-0.280095	-0.266805	-0.25998	-0.230338	-0.19296	-0.140911	-0.0545358	0.0942308	0.268864	0.450603	0.608742	0.687187	0.701968	0.709763	0.683652	0.618458	0.478681	0.268345	0.0859313	-0.0521075	-0.139275	-0.19554	-0.212003	-0.25836
3.63078	-0.306598	-0.302192	-0.301997	-0.30239	-0.30779	-0.313585	-0.297972	-0.303955	-0.291345	-0.300148	-0.30688	-0.287038	-0.298785	-0.305275	-0.30171	-0.2994	-0.302102	-0.295992	-0.290042	-0.289735	-0.30435	-0.308368	-0.291143	-0.273357	-0.27956	-0.264582	-0.247257	-0.238707	-0.201997	-0.141135	-0.0812683	0.0210975	0.167462	0.349359	0.511279	0.637014	0.702459	0.699576	0.70157	0.686945	0.633807	0.510295	0.34406	0.158842	0.0250387	-0.0897864	-0.14805	-0.213363	-0.22759
3.31131	-0.284193	-0.28938	-0.29718	-0.293388	-0.303573	-0.29997	-0.302563	-0.299723	-0.303283	-0.285428	-0.311505	-0.30825	-0.297637	-0.306655	-0.313123	-0.301285	-0.29272	-0.295065	-0.290938	-0.299142	-0.292953	-0.286038	-0.281948	-0.28057	-0.264298	-0.259653	-0.234657	-0.20572	-0.154135	-0.10662	-0.018405	0.100838	0.246045	0.412684	0.557127	0.650548	0.680482	0.695765	0.699369	0.701168	0.65354	0.549232	0.404145	0.248401	0.100138	-0.003865	-0.094515	-0.157883	-0.201167
3.01995	-0.294787	-0.30256	-0.309355	-0.302155	-0.300735	-0.31508	-0.30564	-0.300368	-0.30027	-0.29353	-0.315738	-0.296673	-0.299337	-0.294123	-0.29669	-0.296005	-0.29583	-0.29386	-0.28867	-0.285087	-0.269505	-0.269835	-0.264118	-0.263958	-0.24795	-0.228555	-0.204445	-0.15219	-0.119392	-0.0416625	0.063095	0.183477	0.31467	0.458995	0.58679	0.668887	0.684204	0.698578	0.701172	0.678995	0.669856	0.579916	0.466438	0.32486	0.181145	0.05202	-0.0448225	-0.114282	-0.17739
2.75423	-0.303925	-0.29832	-0.28547	-0.30586	-0.294783	-0.292285	-0.303783	-0.290067	-0.29846	-0.304085	-0.30085	-0.299195	-0.296407	-0.296505	-0.291392	-0.28629	-0.292847	-0.293737	-0.2967	-0.2867	-0.276278	-0.277948	-0.261813	-0.241207	-0.2176	-0.20726	-0.161295	-0.123393	-0.0679625	0.0315525	0.127532	0.255858	0.39055	0.513014	0.614823	0.68009	0.701026	0.691173	0.695779	0.688265	0.660135	0.615434	0.51495	0.392053	0.253606	0.118968	0.0284375	-0.050075	-0.116275
2.51189	-0.303835	-0.303773	-0.301333	-0.298023	-0.309665	-0.294095	-0.292837	-0.301743	-0.296345	-0.296758	-0.302833	-0.303187	-0.29654	-0.306453	-0.299173	-0.290753	-0.283172	-0.27684	-0.28519	-0.27456	-0.261723	-0.25348	-0.24293	-0.229692	-0.204045	-0.162425	-0.107515	-0.0522175	0.011335	0.09465	0.21326	0.32646	0.468058	0.563155	0.631372	0.68265	0.6947	0.713971	0.682175	0.679538	0.681503	0.635374	0.564918	0.43899	0.324313	0.224438	0.106385	0.0199375	-0.054205
2.29087	-0.309117	-0.307578	-0.291683	-0.303988	-0.298995	-0.302185	-0.30774	-0.29406	-0.287665	-0.295465	-0.293605	-0.290665	-0.292117	-0.29418	-0.28347	-0.28301	-0.28798	-0.266203	-0.260738	-0.25262	-0.232678	-0.218232	-0.213223	-0.190213	-0.14335	-0.108802	-0.0567625	-0.002435	0.099315	0.183987	0.29113	0.407133	0.504548	0.58886	0.660787	0.685119	0.689873	0.688385	0.693778	0.684831	0.693539	0.6506	0.591052	0.507622	0.402335	0.28454	0.18879	0.091875	-0.00338
2.0893	-0.29559	-0.303505	-0.295913	-0.29996	-0.28932	-0.29475	-0.294175	-0.28973	-0.290702	-0.2956	-0.277838	-0.291843	-0.281467	-0.280475	-0.269875	-0.264562	-0.26891	-0.259555	-0.248583	-0.245253	-0.220458	-0.193452	-0.16872	-0.148555	-0.099065	-0.0570575	0.0042825	0.074425	0.16775	0.256337	0.354577	0.466857	0.548615	0.61793	0.657305	0.692565	0.710893	0.69658	0.69638	0.69418	0.689244	0.656009	0.616452	0.559485	0.467212	0.365208	0.262715	0.163045	0.08847
1.90546	-0.301353	-0.298	-0.298108	-0.29766	-0.297853	-0.304497	-0.293905	-0.299808	-0.30167	-0.284243	-0.293355	-0.273855	-0.280693	-0.280932	-0.276297	-0.248367	-0.249367	-0.234035	-0.22141	-0.194295	-0.186122	-0.156205	-0.13397	-0.09996	-0.041705	0.011	0.0805625	0.15565	0.242377	0.343803	0.433305	0.518478	0.58206	0.63119	0.674889	0.689273	0.699111	0.699777	0.691379	0.69881	0.682464	0.672732	0.635719	0.580155	0.509258	0.429992	0.32867	0.241375	0.163315
1.7378	-0.301938	-0.29163	-0.30039	-0.308217	-0.294315	-0.28688	-0.292982	-0.28839	-0.285882	-0.285027	-0.274168	-0.271645	-0.262735	-0.25416	-0.248555	-0.242858	-0.237162	-0.207685	-0.186553	-0.159745	-0.141935	-0.106802	-0.064855	-0.031775	0.0251175	0.1017	0.166935	0.24331	0.327122	0.414973	0.485303	0.55625	0.610232	0.658842	0.671596	0.68711	0.698945	0.705977	0.697978	0.700581	0.694695	0.68261	0.67221	0.60976	0.547165	0.49151	0.41584	0.331578	0.23739
1.58489	-0.291422	-0.296175	-0.293265	-0.285322	-0.275005	-0.277083	-0.274405	-0.282807	-0.268103	-0.263035	-0.278282	-0.253057	-0.240687	-0.231585	-0.2132	-0.217583	-0.194525	-0.16415	-0.149808	-0.122372	-0.098255	-0.061805	0.003975	0.0405725	0.108393	0.183622	0.242547	0.315715	0.40027	0.47159	0.538918	0.586472	0.641525	0.65353	0.686328	0.699888	0.708175	0.692177	0.706384	0.70517	0.692916	0.680673	0.664785	0.640405	0.587135	0.54037	0.475215	0.39497	0.319675
1.44544	-0.27928	-0.281005	-0.293932	-0.27791	-0.276653	-0.274703	-0.269643	-0.261025	-0.254777	-0.255312	-0.248223	-0.228293	-0.227005	-0.211152	-0.19846	-0.179308	-0.153062	-0.131133	-0.105732	-0.0660525	-0.03807	0.01403	0.0588825	0.118277	0.193275	0.24349	0.322713	0.39829	0.450375	0.513945	0.57164	0.608105	0.653582	0.66351	0.68785	0.690521	0.692967	0.697381	0.691778	0.690613	0.693327	0.692005	0.668438	0.664898	0.611738	0.57375	0.525068	0.454515	0.387458
1.31826	-0.270785	-0.27998	-0.27228	-0.270913	-0.25929	-0.2575	-0.258582	-0.242913	-0.242325	-0.22653	-0.21851	-0.205045	-0.192227	-0.167557	-0.153447	-0.124438	-0.102865	-0.069425	-0.0455175	0.009105	0.034025	0.0947725	0.147643	0.193575	0.252692	0.328765	0.389235	0.456615	0.505648	0.548682	0.614977	0.635065	0.67213	0.67939	0.689255	0.695295	0.691954	0.684983	0.698388	0.708917	0.696521	0.69848	0.682298	0.667628	0.64711	0.60845	0.557177	0.50618	0.464722
1.20226	-0.272415	-0.256673	-0.258655	-0.252018	-0.244957	-0.235965	-0.225678	-0.219117	-0.20298	-0.203687	-0.194238	-0.158282	-0.146267	-0.119193	-0.09854	-0.076655	-0.044515	-0.014575	0.029685	0.0775	0.114233	0.17192	0.22857	0.2798	0.335547	0.404892	0.454593	0.491565	0.55764	0.58998	0.628848	0.65722	0.671745	0.686813	0.69535	0.68565	0.691691	0.686779	0.697784	0.685006	0.688445	0.696063	0.678602	0.675462	0.656977	0.620467	0.59572	0.552403	0.497625
1.09648	-0.249035	-0.23344	-0.231417	-0.220447	-0.21426	-0.21005	-0.207033	-0.181922	-0.167295	-0.157078	-0.14149	-0.111802	-0.103722	-0.0693575	-0.0470425	-0.01996	0.0286575	0.06164	0.112735	0.152012	0.19268	0.235127	0.29417	0.347575	0.40869	0.461695	0.498773	0.54831	0.589352	0.62529	0.648672	0.6683	0.681025	0.693488	0.688658	0.689322	0.691084	0.696793	0.689594	0.705894	0.690858	0.690995	0.675037	0.675907	0.658682	0.63696	0.62326	0.590345	0.539355
1	-0.235407	-0.222367	-0.210528	-0.195582	-0.187575	-0.189557	-0.15929	-0.141728	-0.129802	-0.106497	-0.0908125	-0.0520725	-0.0423575	-0.0098775	0.03071	0.053435	0.11217	0.140005	0.190387	0.226098	0.275995	0.32033	0.373302	0.435947	0.4549	0.502073	0.551743	0.58413	0.617285	0.634668	0.66985	0.672025	0.68848	0.700245	0.68429	0.702708	0.699981	0.692187	0.709784	0.688384	0.696785	0.69999	0.685338	0.68351	0.681005	0.666332	0.647145	0.608805	0.588747
0.912011	-0.202363	-0.18819	-0.163535	-0.17109	-0.144095	-0.135423	-0.120497	-0.091165	-0.08176	-0.057335	-0.0232125	-0.006665	0.04472	0.0757125	0.116663	0.150773	0.17098	0.217092	0.25901	0.299142	0.34263	0.390143	0.436325	0.48995	0.51475	0.553965	0.589485	0.60476	0.63639	0.658135	0.675275	0.6785	0.691388	0.683028	0.69264	0.70185	0.700573	0.703591	0.710384	0.695426	0.697072	0.697843	0.69977	0.691712	0.672728	0.676662	0.658937	0.637197	0.606143
0.831764	-0.14479	-0.154803	-0.13135	-0.11014	-0.100165	-0.0756225	-0.04444	-0.02843	-0.0027575	0.0232725	0.035905	0.077225	0.103542	0.151003	0.180858	0.207058	0.26247	0.298723	0.342662	0.37622	0.41177	0.455885	0.49972	0.531628	0.552175	0.587425	0.60372	0.633528	0.648323	0.68187	0.677575	0.69281	0.690845	0.705745	0.702497	0.695625	0.690468	0.697386	0.697986	0.701853	0.696627	0.693545	0.695033	0.694795	0.69004	0.689163	0.660225	0.647455	0.633548
0.758578	-0.105955	-0.07964	-0.077185	-0.053705	-0.0394675	-0.0134725	0.0157275	0.048005	0.064585	0.103758	0.114723	0.157722	0.187535	0.218057	0.253727	0.291243	0.32811	0.360938	0.407593	0.443072	0.474905	0.493607	0.53968	0.574495	0.596662	0.601222	0.63162	0.648487	0.65644	0.67318	0.687035	0.69747	0.684368	0.699485	0.69143	0.682763	0.695875	0.697187	0.698186	0.700088	0.699028	0.70324	0.701295	0.693325	0.690597	0.684588	0.671375	0.664767	0.64206
0.691831	-0.054005	-0.0288775	0.0047875	0.0178025	0.04995	0.0635275	0.0995575	0.0990225	0.13593	0.175978	0.20908	0.241668	0.265582	0.291185	0.339353	0.363517	0.393575	0.439933	0.455015	0.49747	0.515208	0.551943	0.57528	0.598158	0.614925	0.63727	0.65212	0.655643	0.673375	0.67629	0.69628	0.681495	0.698755	0.70102	0.699717	0.687262	0.6905	0.700798	0.704182	0.70091	0.696335	0.702067	0.710295	0.683955	0.694785	0.694963	0.68061	0.668098	0.671665
0.630957	0.015755	0.0407175	0.061285	0.076335	0.11349	0.139843	0.169978	0.208792	0.22828	0.24613	0.272253	0.317597	0.34789	0.37497	0.402027	0.42676	0.459927	0.491075	0.517077	0.530545	0.568455	0.58613	0.60607	0.62203	0.644505	0.642957	0.676515	0.652423	0.679515	0.694222	0.681797	0.703315	0.698093	0.704063	0.700495	0.697145	0.713328	0.694379	0.707787	0.702542	0.695318	0.695485	0.682652	0.691925	0.6864	0.706453	0.677907	0.67174	0.665687
0.57544	0.095635	0.11895	0.151225	0.169085	0.198275	0.225467	0.234205	0.28315	0.30128	0.333282	0.354585	0.391427	0.41357	0.441213	0.464955	0.5054	0.50325	0.539162	0.551867	0.58775	0.59344	0.608128	0.623315	0.644197	0.652957	0.660828	0.68032	0.68797	0.677865	0.689937	0.695585	0.68027	0.708193	0.69356	0.704855	0.700562	0.700727	0.693984	0.696786	0.699345	0.695412	0.70189	0.69181	0.704148	0.690118	0.695468	0.68037	0.692828	0.67789
0.524807	0.169605	0.198222	0.2284	0.254408	0.279797	0.296523	0.318595	0.359783	0.378557	0.392493	0.423038	0.449217	0.465568	0.48232	0.509485	0.537805	0.54909	0.57688	0.586595	0.609155	0.619985	0.619452	0.647168	0.651748	0.670752	0.669435	0.687708	0.681238	0.684813	0.691948	0.688235	0.701873	0.699503	0.697932	0.692175	0.70644	0.694558	0.691588	0.70219	0.708765	0.690438	0.692847	0.69734	0.700995	0.701712	0.692415	0.702743	0.676562	0.68054
0.47863	0.256555	0.285262	0.295567	0.33572	0.335715	0.371695	0.38809	0.39849	0.446647	0.464442	0.47041	0.498805	0.518373	0.54344	0.557902	0.568873	0.573603	0.614332	0.614365	0.619698	0.649425	0.640628	0.650508	0.663717	0.66958	0.67005	0.686987	0.703025	0.681782	0.693632	0.691175	0.698405	0.706765	0.703795	0.697518	0.706462	0.70578	0.699993	0.693393	0.702363	0.702668	0.69549	0.700753	0.68882	0.70585	0.696975	0.69664	0.692255	0.69893
0.436516	0.323873	0.35119	0.372213	0.396395	0.417727	0.42994	0.446238	0.473917	0.490445	0.507818	0.530133	0.54639	0.56536	0.584305	0.58743	0.604125	0.614465	0.62229	0.643262	0.637478	0.66669	0.661655	0.667822	0.689017	0.681775	0.687338	0.682965	0.67897	0.689165	0.69381	0.699682	0.698168	0.69816	0.691305	0.711313	0.694095	0.696588	0.695993	0.698388	0.687388	0.690283	0.708372	0.6916	0.710703	0.68291	0.696695	0.699345	0.687937	0.68909
0.398107	0.394253	0.428422	0.43414	0.455153	0.470662	0.490667	0.509975	0.523983	0.542035	0.55914	0.566028	0.576568	0.58835	0.601733	0.618487	0.637543	0.644243	0.645495	0.647497	0.666055	0.664157	0.674365	0.683373	0.68283	0.683025	0.696867	0.696998	0.696155	0.684688	0.694093	0.694735	0.69744	0.688107	0.69458	0.696638	0.70211	0.702368	0.698795	0.706398	0.691958	0.706915	0.688612	0.696017	0.69869	0.68819	0.701028	0.69339	0.69962	0.694315
0.363078	0.47122	0.46587	0.5038	0.514123	0.52296	0.53143	0.54207	0.575102	0.571403	0.587043	0.611495	0.617722	0.616552	0.639683	0.635505	0.64435	0.64163	0.657783	0.67482	0.660752	0.673512	0.682702	0.683875	0.688457	0.67691	0.688322	0.695253	0.693555	0.703385	0.698685	0.699152	0.702143	0.700527	0.69728	0.696852	0.69735	0.695773	0.703195	0.695793	0.691172	0.698527	0.691695	0.695647	0.692873	0.703705	0.69096	0.698703	0.698643	0.68091
0.331131	0.511482	0.537722	0.53752	0.56058	0.56466	0.575597	0.582327	0.58074	0.600222	0.626595	0.625645	0.617755	0.631295	0.657818	0.659632	0.658183	0.662757	0.676605	0.66915	0.671887	0.686327	0.685175	0.686993	0.702372	0.701457	0.69325	0.6956	0.703505	0.694518	0.696253	0.697985	0.69772	0.696577	0.704008	0.69367	0.697335	0.71438	0.697388	0.687195	0.702575	0.690353	0.69349	0.685957	0.70058	0.703355	0.697865	0.691285	0.70164	0.696725
0.301995	0.550713	0.550837	0.57037	0.57748	0.610102	0.598625	0.621335	0.617513	0.62193	0.643667	0.64812	0.648645	0.658977	0.662748	0.66964	0.667775	0.675693	0.668183	0.686177	0.681055	0.685405	0.685945	0.6849	0.696785	0.702557	0.707607	0.69852	0.701015	0.689715	0.69452	0.685462	0.701515	0.70469	0.692222	0.70109	0.703947	0.70497	0.69839	0.698597	0.691982	0.710743	0.6975	0.70725	0.702488	0.696682	0.697597	0.695878	0.702085	0.684902
0.275423	0.585873	0.5934	0.60077	0.607938	0.622465	0.633182	0.63453	0.640335	0.6467	0.653667	0.662813	0.66592	0.67114	0.672635	0.676028	0.688937	0.680303	0.684852	0.680697	0.686048	0.696025	0.690573	0.692662	0.699975	0.694087	0.69547	0.690325	0.699802	0.703668	0.701063	0.699875	0.707002	0.70355	0.691072	0.698135	0.706365	0.69038	0.690198	0.699597	0.698793	0.70135	0.704935	0.685895	0.698735	0.685405	0.695462	0.701928	0.698198	0.689145
0.251189	0.617337	0.624367	0.643625	0.636643	0.64903	0.645735	0.648722	0.662385	0.65913	0.67378	0.661168	0.670415	0.672515	0.686327	0.683203	0.687418	0.689898	0.683728	0.68173	0.674087	0.700547	0.690423	0.699873	0.695098	0.68179	0.703205	0.695283	0.69099	0.700788	0.700325	0.69778	0.69229	0.698015	0.69851	0.698735	0.68999	0.694398	0.703797	0.70319	0.708583	0.705985	0.710738	0.703087	0.695403	0.705535	0.689975	0.684455	0.691743	0.689755
0.229087	0.637145	0.64184	0.64325	0.65328	0.65865	0.658935	0.658273	0.670257	0.670652	0.67559	0.68325	0.680022	0.672785	0.686627	0.696025	0.676028	0.68025	0.688233	0.689035	0.699113	0.687458	0.689878	0.71421	0.698643	0.706048	0.706082	0.695477	0.69357	0.709912	0.69189	0.700847	0.699795	0.69402	0.690525	0.703348	0.69797	0.695795	0.684597	0.699795	0.703192	0.690365	0.703935	0.696913	0.703647	0.69777	0.70005	0.69988	0.692303	0.684767
0.20893	0.661262	0.644927	0.6502	0.661395	0.670535	0.667233	0.666475	0.66511	0.667937	0.676245	0.68094	0.685658	0.684952	0.67949	0.70159	0.702248	0.682063	0.686895	0.693395	0.683412	0.68975	0.686288	0.690495	0.697705	0.693353	0.697425	0.702917	0.70101	0.69234	0.70031	0.691307	0.696037	0.690675	0.697135	0.694163	0.694782	0.699595	0.687797	0.7038	0.699795	0.697187	0.706148	0.697545	0.694905	0.69704	0.70015	0.6962	0.696465	0.69908
0.190546	0.65655	0.664682	0.665883	0.663538	0.667465	0.677527	0.687225	0.68201	0.68523	0.683697	0.682277	0.69024	0.695867	0.685948	0.689322	0.682652	0.681925	0.697105	0.705105	0.698165	0.695558	0.696333	0.703192	0.70018	0.688925	0.695033	0.693705	0.707043	0.704788	0.707327	0.69437	0.700065	0.69627	0.69416	0.704952	0.699785	0.689793	0.708398	0.702995	0.68979	0.70139	0.682752	0.699553	0.692125	0.709283	0.70722	0.697547	0.687985	0.705098
0.17378	0.670907	0.680238	0.67576	0.68841	0.68803	0.68544	0.674198	0.693128	0.69358	0.694875	0.685198	0.691285	0.682667	0.687052	0.680922	0.697035	0.702492	0.702503	0.683763	0.700125	0.696045	0.709055	0.699362	0.695253	0.6969	0.703925	0.703037	0.696568	0.682735	0.706363	0.69682	0.703697	0.68874	0.698738	0.700178	0.686575	0.704195	0.701797	0.6876	0.702195	0.692588	0.698585	0.686745	0.698723	0.691685	0.696845	0.697392	0.69748	0.6974
0.158489	0.676423	0.68134	0.686805	0.68961	0.68229	0.69807	0.695335	0.695017	0.70198	0.689072	0.690315	0.67817	0.697148	0.68804	0.691	0.68547	0.69179	0.707	0.702277	0.692048	0.687418	0.695475	0.695368	0.694187	0.70273	0.68666	0.70059	0.691898	0.687985	0.700222	0.691485	0.690288	0.689738	0.693168	0.687565	0.695788	0.694185	0.7168	0.680998	0.697998	0.69259	0.701963	0.693958	0.690952	0.693523	0.70291	0.69082	0.70971	0.693843
0.144544	0.689645	0.687702	0.686033	0.68685	0.68027	0.696235	0.68178	0.687932	0.694508	0.69546	0.706753	0.689155	0.70337	0.703695	0.693925	0.68884	0.695758	0.70606	0.702795	0.697797	0.695972	0.692532	0.709345	0.695398	0.706932	0.6942	0.699337	0.706207	0.697835	0.700855	0.698913	0.701745	0.68935	0.697767	0.691375	0.702388	0.68519	0.6986	0.6978	0.70679	0.707387	0.69958	0.699168	0.69815	0.70134	0.701252	0.702453	0.688828	0.682567
0.131826	0.683735	0.69271	0.688177	0.695275	0.684635	0.701817	0.699788	0.68148	0.694863	0.689168	0.694148	0.684265	0.704055	0.693052	0.694647	0.69831	0.703442	0.704653	0.687882	0.701565	0.699093	0.69679	0.685645	0.7063	0.707845	0.714503	0.696747	0.703435	0.692035	0.696265	0.690922	0.689353	0.69516	0.70977	0.693985	0.69439	0.705198	0.696995	0.6932	0.690795	0.700192	0.688972	0.69537	0.696553	0.692932	0.70072	0.69467	0.700063	0.695207
0.120226	0.700928	0.698477	0.698778	0.69581	0.687495	0.692705	0.698788	0.702392	0.696145	0.693975	0.693085	0.691505	0.69934	0.703525	0.69932	0.693168	0.70401	0.69308	0.695577	0.696532	0.691187	0.69708	0.701608	0.692292	0.701732	0.70116	0.708028	0.70488	0.697283	0.706307	0.688315	0.700947	0.698163	0.705978	0.694782	0.68599	0.699595	0.694597	0.6972	0.699595	0.70019	0.704782	0.701778	0.699963	0.698168	0.68893	0.702928	0.707102	0.69325
0.109648	0.69865	0.707242	0.697682	0.692368	0.709488	0.692828	0.696717	0.69492	0.696978	0.70188	0.689365	0.692205	0.698375	0.687503	0.706278	0.69768	0.6937	0.69962	0.712385	0.702843	0.69395	0.689425	0.702075	0.702887	0.694357	0.694823	0.691845	0.689303	0.6999	0.708135	0.698553	0.700952	0.700765	0.69778	0.697	0.70399	0.693395	0.714395	0.694398	0.702195	0.69639	0.69619	0.696967	0.691982	0.680755	0.70235	0.69992	0.709302	0.690105
0.1	0.691362	0.710193	0.700072	0.69746	0.69574	0.69822	0.698658	0.70537	0.692535	0.707128	0.697063	0.693597	0.693052	0.706457	0.702043	0.705845	0.69739	0.693843	0.6925	0.704157	0.707905	0.704525	0.698353	0.694998	0.701252	0.694237	0.696275	0.689712	0.69373	0.690163	0.690342	0.69557	0.691765	0.709187	0.69879	0.69119	0.689	0.698998	0.685397	0.6948	0.697998	0.701788	0.691582	0.696565	0.700585	0.696345	0.701758	0.69913	0.69473
[truncated: 2 more columns]
