# Supplementary material for: Exploiting the mediating role of the metabolome to unravel transcript-to-phenotype associations
Source: eLife. 2023 Mar 9;12:e81097. doi: 10.7554/eLife.81097 (PMC9998083; doi:10.7554/eLife.81097)
Supplement: Figure 4—source data 2. — Each cell represents the mean difference in power between TWMR and mediation analysis for a given scenario across 10 simulations. Rows reflect decreasing ratio between transcript-to-metabolite and metabolite-to-phenotype effects from 10 to 0.1 (sigma). Columns reflect increasing proportion of direct to total effect from –2 to 2 (rho). This file relates to Figure 4A. [file elife-81097-fig4-data2.xlsx]

## Sheet: Sheet1
sigma/direct	-2	-1.92	-1.84	-1.76	-1.68	-1.6	-1.52	-1.44	-1.36	-1.28	-1.2	-1.12	-1.04	-0.96	-0.88	-0.8	-0.72	-0.64	-0.56	-0.48	-0.4	-0.32	-0.24	-0.16	-0.08	0	0.08	0.16	0.24	0.32	0.4	0.48	0.56	0.64	0.72	0.8	0.88	0.96	1.04	1.12	1.2	1.28	1.36	1.44	1.52	1.6	1.68	1.76	1.84
10	-0.3062	-0.2966	-0.2964	-0.3074	-0.304	-0.3008	-0.2996	-0.2886	-0.3046	-0.311	-0.3004	-0.2854	-0.2996	-0.305	-0.2962	-0.299	-0.30375	-0.3084	-0.29555	-0.3046	-0.29165	-0.3038	-0.2942	-0.2866	-0.2925	-0.29175	-0.2766	-0.2782	-0.2386	-0.2397	-0.185	-0.1298	-0.0238	0.07065	0.25215	0.4394	0.59075	0.689042	0.682205	0.5839	0.4511	0.24735	0.0701	-0.04345	-0.1235	-0.1687	-0.2269	-0.2491	-0.27835
9.12011	-0.3098	-0.3074	-0.3014	-0.304	-0.2998	-0.3128	-0.2958	-0.306	-0.2992	-0.2948	-0.2976	-0.2984	-0.2974	-0.3096	-0.3022	-0.291	-0.3036	-0.3096	-0.29215	-0.3134	-0.3012	-0.3013	-0.2983	-0.3103	-0.29455	-0.2912	-0.2915	-0.28755	-0.27515	-0.25795	-0.2167	-0.1995	-0.05695	0.0333	0.1964	0.35525	0.57955	0.676948	0.676771	0.571	0.3801	0.1905	0.05075	-0.12225	-0.18995	-0.2192	-0.2352	-0.28285	-0.2854
8.31764	-0.2988	-0.3008	-0.2966	-0.313	-0.2956	-0.2954	-0.305	-0.2912	-0.3006	-0.299	-0.2878	-0.299	-0.2888	-0.2932	-0.3152	-0.2988	-0.3014	-0.288	-0.303	-0.304	-0.29635	-0.30395	-0.2969	-0.31295	-0.3117	-0.2955	-0.29185	-0.2677	-0.28365	-0.25375	-0.23325	-0.21115	-0.17985	-0.04945	0.12085	0.3368	0.5505	0.680513	0.666142	0.5516	0.3575	0.1386	-0.02345	-0.13825	-0.1911	-0.2501	-0.26615	-0.2872	-0.28745
7.58578	-0.2948	-0.3078	-0.303	-0.296	-0.298	-0.306	-0.2908	-0.2944	-0.3044	-0.3008	-0.294	-0.304	-0.3006	-0.2954	-0.3054	-0.319	-0.3198	-0.2998	-0.3146	-0.3092	-0.3088	-0.2954	-0.30185	-0.3136	-0.30815	-0.30095	-0.29875	-0.2906	-0.285	-0.26815	-0.25965	-0.21825	-0.16825	-0.08185	0.07475	0.303	0.5483	0.676102	0.66838	0.537	0.28665	0.0744	-0.0965	-0.1943	-0.21625	-0.2555	-0.273	-0.2759	-0.296
6.91831	-0.3054	-0.3096	-0.2888	-0.3084	-0.2994	-0.2976	-0.3048	-0.2946	-0.3044	-0.296	-0.2986	-0.302	-0.2944	-0.2976	-0.3	-0.2984	-0.2946	-0.3106	-0.3078	-0.2932	-0.3098	-0.3038	-0.317	-0.3092	-0.306	-0.3021	-0.2958	-0.29265	-0.2951	-0.2799	-0.2647	-0.24115	-0.2077	-0.12225	0.01605	0.25675	0.534251	0.691646	0.674093	0.495505	0.24005	-0.00285	-0.1041	-0.20105	-0.24725	-0.2746	-0.29065	-0.2922	-0.3009
6.30957	-0.3024	-0.3004	-0.2954	-0.3146	-0.2912	-0.3082	-0.284	-0.3094	-0.2998	-0.2982	-0.3136	-0.3038	-0.3052	-0.2904	-0.2966	-0.2854	-0.2902	-0.3028	-0.3046	-0.3034	-0.2958	-0.2972	-0.2952	-0.3134	-0.31595	-0.29115	-0.30095	-0.2971	-0.313	-0.29495	-0.2852	-0.27435	-0.237	-0.1716	-0.02455	0.17715	0.472167	0.662788	0.682601	0.47531	0.1742	-0.05565	-0.17905	-0.22265	-0.26045	-0.2835	-0.28925	-0.29795	-0.3008
5.7544	-0.305	-0.2974	-0.298	-0.3046	-0.3032	-0.2958	-0.3032	-0.3012	-0.3014	-0.2926	-0.3048	-0.2922	-0.3064	-0.3028	-0.288	-0.3028	-0.309	-0.3036	-0.2982	-0.3082	-0.2942	-0.297	-0.3008	-0.3092	-0.3016	-0.30215	-0.30115	-0.31145	-0.3059	-0.29825	-0.2822	-0.2825	-0.2303	-0.20665	-0.0916	0.0785	0.407291	0.667477	0.668521	0.429683	0.09975	-0.10125	-0.21005	-0.2287	-0.2715	-0.28225	-0.2891	-0.3033	-0.30635
5.24807	-0.3064	-0.3044	-0.2974	-0.305	-0.3	-0.298	-0.2974	-0.308	-0.3082	-0.2972	-0.3012	-0.2982	-0.3038	-0.3036	-0.2934	-0.2974	-0.2904	-0.3152	-0.3114	-0.31	-0.2864	-0.3156	-0.3022	-0.3188	-0.3014	-0.29895	-0.3026	-0.3024	-0.3066	-0.2985	-0.2977	-0.2814	-0.269	-0.2388	-0.1123	0.07145	0.364706	0.673741	0.667082	0.359357	0.07105	-0.14415	-0.2128	-0.27305	-0.2861	-0.29805	-0.3055	-0.2855	-0.303
4.7863	-0.298	-0.2914	-0.2958	-0.2982	-0.309	-0.2954	-0.2984	-0.3084	-0.2994	-0.2922	-0.3106	-0.2972	-0.2992	-0.3012	-0.2968	-0.3106	-0.3038	-0.3056	-0.2854	-0.2974	-0.3	-0.2954	-0.3028	-0.299	-0.3144	-0.3058	-0.293	-0.29235	-0.2994	-0.29575	-0.3024	-0.2928	-0.25585	-0.225	-0.20635	-0.0086	0.311471	0.657273	0.660321	0.32141	-0.02105	-0.1872	-0.2562	-0.2773	-0.28265	-0.3013	-0.2992	-0.2898	-0.2992
4.36516	-0.2932	-0.2962	-0.305	-0.3006	-0.3	-0.3064	-0.2952	-0.3032	-0.2996	-0.2968	-0.3112	-0.298	-0.3186	-0.2908	-0.2908	-0.3064	-0.3068	-0.2968	-0.3014	-0.2976	-0.2998	-0.3052	-0.3026	-0.3022	-0.3002	-0.3068	-0.3002	-0.2912	-0.3072	-0.3026	-0.30135	-0.2938	-0.2907	-0.26525	-0.2094	-0.0492466	0.250609	0.653452	0.648124	0.241635	-0.0844982	-0.1966	-0.2664	-0.2791	-0.3009	-0.28515	-0.295	-0.2942	-0.3048
3.98107	-0.308	-0.311	-0.3032	-0.2944	-0.2964	-0.3038	-0.2948	-0.3044	-0.3092	-0.2958	-0.3034	-0.2944	-0.2886	-0.2968	-0.2822	-0.3102	-0.3138	-0.3006	-0.289	-0.3058	-0.2986	-0.2936	-0.2958	-0.294	-0.3104	-0.3026	-0.2952	-0.3008	-0.299	-0.303	-0.294	-0.3029	-0.29435	-0.28455	-0.2202	-0.116968	0.196197	0.640554	0.659158	0.234623	-0.108084	-0.2243	-0.2758	-0.287	-0.30135	-0.3017	-0.3048	-0.3032	-0.2918
3.63078	-0.306	-0.306	-0.3138	-0.2916	-0.3014	-0.295	-0.2956	-0.3092	-0.3006	-0.3004	-0.292	-0.3	-0.301	-0.2938	-0.305	-0.2886	-0.2978	-0.3042	-0.3078	-0.287	-0.3034	-0.3014	-0.302	-0.303	-0.299	-0.2998	-0.3014	-0.3058	-0.295	-0.2962	-0.29715	-0.3068	-0.2896	-0.2797	-0.2603	-0.163619	0.137274	0.655342	0.642495	0.166141	-0.149931	-0.2543	-0.2855	-0.287	-0.29885	-0.2978	-0.3072	-0.2998	-0.3042
3.31131	-0.295	-0.2904	-0.306	-0.3112	-0.291	-0.3	-0.3074	-0.3014	-0.2942	-0.2986	-0.2992	-0.2976	-0.2976	-0.2992	-0.3156	-0.2974	-0.303	-0.309	-0.312	-0.299	-0.3082	-0.2984	-0.2946	-0.3034	-0.3008	-0.3046	-0.3026	-0.2944	-0.305	-0.2914	-0.3028	-0.3	-0.296	-0.2954	-0.2782	-0.195351	0.0886063	0.637273	0.653257	0.0658544	-0.203444	-0.265398	-0.2873	-0.3019	-0.29095	-0.29615	-0.3038	-0.3134	-0.3052
3.01995	-0.2948	-0.3052	-0.301	-0.3044	-0.2944	-0.3084	-0.2904	-0.3052	-0.2998	-0.3054	-0.3066	-0.3048	-0.3028	-0.3042	-0.3024	-0.302	-0.3014	-0.3004	-0.3022	-0.295	-0.3012	-0.3032	-0.3088	-0.3052	-0.2936	-0.3048	-0.303	-0.3062	-0.2994	-0.2942	-0.302	-0.3024	-0.30615	-0.297048	-0.282195	-0.226943	0.058611	0.663548	0.658816	0.0686996	-0.209044	-0.279388	-0.29235	-0.30275	-0.3018	-0.31	-0.308	-0.2948	-0.3022
2.75423	-0.304	-0.2914	-0.301	-0.315	-0.3006	-0.293	-0.3094	-0.3034	-0.3084	-0.3028	-0.3068	-0.296	-0.2996	-0.309	-0.304	-0.2974	-0.3024	-0.2984	-0.3072	-0.3124	-0.2994	-0.2932	-0.2954	-0.3032	-0.3052	-0.299	-0.2968	-0.303	-0.296	-0.3096	-0.3064	-0.3008	-0.30235	-0.2938	-0.282328	-0.230877	-0.0109146	0.65546	0.641509	-0.00655259	-0.275555	-0.292855	-0.31165	-0.31155	-0.2978	-0.2942	-0.2988	-0.2972	-0.3004
2.51189	-0.313	-0.2962	-0.3048	-0.3022	-0.2984	-0.2962	-0.2978	-0.3028	-0.2982	-0.3022	-0.3062	-0.3014	-0.2984	-0.3	-0.2992	-0.3038	-0.3042	-0.3086	-0.2986	-0.3	-0.2998	-0.3012	-0.2972	-0.3054	-0.2928	-0.2972	-0.3134	-0.2978	-0.2936	-0.2998	-0.2964	-0.2938	-0.3028	-0.302345	-0.296256	-0.251303	-0.0610907	0.656274	0.656062	-0.0436402	-0.243958	-0.295069	-0.3138	-0.30035	-0.3062	-0.315	-0.3106	-0.3038	-0.3054
2.29087	-0.299	-0.2958	-0.3098	-0.3152	-0.2984	-0.3044	-0.3058	-0.3046	-0.3136	-0.3104	-0.3042	-0.3074	-0.3068	-0.3	-0.2982	-0.3084	-0.3066	-0.3116	-0.2924	-0.2858	-0.294	-0.3032	-0.307	-0.3022	-0.3018	-0.3086	-0.2932	-0.3018	-0.2996	-0.3084	-0.3124	-0.2984	-0.3042	-0.29798	-0.304791	-0.283359	-0.0963783	0.659299	0.646523	-0.0764568	-0.269014	-0.302598	-0.306737	-0.3022	-0.298	-0.3022	-0.3076	-0.3044	-0.298
2.0893	-0.2978	-0.2976	-0.2962	-0.3046	-0.2962	-0.3024	-0.2934	-0.2986	-0.3032	-0.3108	-0.3082	-0.299	-0.2882	-0.3114	-0.3032	-0.297	-0.3024	-0.3082	-0.305	-0.306	-0.297	-0.3072	-0.315	-0.296	-0.3076	-0.312	-0.3066	-0.3082	-0.2996	-0.304	-0.305	-0.2954	-0.297797	-0.296755	-0.293239	-0.295666	-0.0926997	0.655529	0.65647	-0.0991634	-0.265999	-0.303717	-0.299532	-0.303393	-0.299	-0.3024	-0.311	-0.3174	-0.2992
1.90546	-0.302	-0.295	-0.298	-0.2956	-0.3	-0.3006	-0.3082	-0.307	-0.297	-0.3106	-0.2922	-0.2996	-0.3038	-0.2894	-0.2906	-0.3008	-0.2966	-0.2924	-0.3026	-0.3012	-0.2954	-0.2978	-0.301	-0.299	-0.3062	-0.304	-0.3088	-0.3068	-0.31	-0.3004	-0.3084	-0.3082	-0.300787	-0.301252	-0.298928	-0.283188	-0.0904782	0.654471	0.65547	-0.0670069	-0.277659	-0.303917	-0.30105	-0.313588	-0.3038	-0.3106	-0.299	-0.303	-0.305
1.7378	-0.2936	-0.2952	-0.3042	-0.2958	-0.3004	-0.295	-0.2922	-0.307	-0.3036	-0.3138	-0.311	-0.3028	-0.2926	-0.3022	-0.2948	-0.2978	-0.2958	-0.303	-0.2986	-0.3038	-0.2968	-0.3078	-0.294	-0.3098	-0.306	-0.3006	-0.2908	-0.3056	-0.2974	-0.3042	-0.3118	-0.3044	-0.305768	-0.29505	-0.297767	-0.260618	-0.0636952	0.665401	0.678058	-0.0748337	-0.269951	-0.305598	-0.297613	-0.299957	-0.302397	-0.300592	-0.2918	-0.3068	-0.3042
1.58489	-0.3072	-0.3024	-0.3046	-0.3092	-0.2992	-0.3086	-0.2974	-0.3018	-0.304	-0.3048	-0.3044	-0.31	-0.2994	-0.305	-0.3134	-0.3022	-0.2914	-0.3044	-0.2978	-0.2922	-0.3078	-0.2948	-0.3038	-0.2928	-0.304	-0.2964	-0.2916	-0.298	-0.2968	-0.3102	-0.294797	-0.299967	-0.304275	-0.307482	-0.285395	-0.259879	-0.0467637	0.660024	0.671361	-0.0358753	-0.27096	-0.29906	-0.310993	-0.29806	-0.31518	-0.2916	-0.2968	-0.2992	-0.293
1.44544	-0.3002	-0.294	-0.3078	-0.302	-0.3054	-0.2944	-0.3062	-0.3044	-0.3046	-0.3172	-0.3044	-0.301	-0.29	-0.3092	-0.3122	-0.3126	-0.302	-0.307	-0.3036	-0.2958	-0.3096	-0.2966	-0.2934	-0.3062	-0.299	-0.302	-0.292	-0.3048	-0.3076	-0.307598	-0.313785	-0.310555	-0.306525	-0.29841	-0.290315	-0.240277	0.0198098	0.682798	0.684699	0.0357883	-0.249404	-0.285535	-0.298075	-0.29748	-0.31055	-0.296992	-0.3038	-0.3062	-0.3078
1.31826	-0.2946	-0.292	-0.3	-0.2956	-0.3066	-0.2942	-0.2916	-0.2988	-0.3132	-0.31	-0.3038	-0.3172	-0.2908	-0.3016	-0.3004	-0.3002	-0.2978	-0.2988	-0.302	-0.3008	-0.306	-0.3006	-0.305	-0.2986	-0.2982	-0.291	-0.3064	-0.3026	-0.2978	-0.297985	-0.296965	-0.307038	-0.294955	-0.295295	-0.28995	-0.219895	0.0839555	0.681619	0.681524	0.0846487	-0.20911	-0.279135	-0.301755	-0.306	-0.30743	-0.30258	-0.300397	-0.3066	-0.3052
1.20226	-0.3056	-0.3096	-0.2942	-0.2972	-0.2958	-0.298	-0.2976	-0.2978	-0.2976	-0.3126	-0.3054	-0.2948	-0.2962	-0.3002	-0.3088	-0.3008	-0.3034	-0.3058	-0.2942	-0.3068	-0.3106	-0.2982	-0.2992	-0.3006	-0.3044	-0.3058	-0.3024	-0.293	-0.292995	-0.298382	-0.28473	-0.296013	-0.300198	-0.29645	-0.280995	-0.195112	0.15903	0.686526	0.694063	0.159654	-0.190808	-0.273365	-0.290193	-0.296247	-0.30677	-0.296305	-0.299785	-0.298195	-0.308798
1.09648	-0.3026	-0.3046	-0.314	-0.3148	-0.2952	-0.2988	-0.2986	-0.2994	-0.308	-0.3096	-0.2952	-0.303	-0.301	-0.2862	-0.3046	-0.2976	-0.3096	-0.3038	-0.2996	-0.301	-0.3122	-0.3024	-0.2944	-0.2972	-0.3078	-0.3066	-0.292797	-0.30519	-0.299972	-0.29672	-0.306818	-0.30468	-0.282697	-0.281465	-0.25979	-0.151067	0.237076	0.690068	0.68527	0.240092	-0.149268	-0.252095	-0.293928	-0.302523	-0.31191	-0.308192	-0.303553	-0.30318	-0.309
1	-0.3014	-0.2962	-0.2974	-0.3016	-0.2978	-0.302	-0.2926	-0.3028	-0.3016	-0.3038	-0.3018	-0.3004	-0.3118	-0.2998	-0.2924	-0.3028	-0.3042	-0.2986	-0.3226	-0.3016	-0.3008	-0.2996	-0.3112	-0.306	-0.3028	-0.307397	-0.3	-0.285593	-0.300548	-0.309262	-0.29741	-0.305978	-0.290832	-0.283037	-0.24674	-0.105972	0.306334	0.685245	0.681045	0.312344	-0.09008	-0.221812	-0.280295	-0.297135	-0.298642	-0.299243	-0.29342	-0.302152	-0.309582
0.912011	-0.3088	-0.3004	-0.2986	-0.2892	-0.2976	-0.2908	-0.3074	-0.292	-0.3046	-0.3182	-0.303	-0.3064	-0.3078	-0.3062	-0.3022	-0.293	-0.2896	-0.3094	-0.2984	-0.3094	-0.2934	-0.295	-0.298	-0.3084	-0.3006	-0.311397	-0.313575	-0.298765	-0.29506	-0.304237	-0.291747	-0.281878	-0.294227	-0.279212	-0.204347	-0.038305	0.386847	0.694697	0.690939	0.375938	-0.0486875	-0.218943	-0.267942	-0.30002	-0.309323	-0.29854	-0.305115	-0.304248	-0.302963
0.831764	-0.3104	-0.3082	-0.304	-0.2964	-0.302	-0.3136	-0.3042	-0.3068	-0.3046	-0.3076	-0.309	-0.2954	-0.3056	-0.2972	-0.3074	-0.3102	-0.3034	-0.2978	-0.2964	-0.3054	-0.3074	-0.303	-0.2988	-0.305795	-0.310588	-0.303982	-0.303748	-0.29488	-0.296675	-0.296057	-0.289938	-0.295615	-0.27861	-0.25093	-0.179185	0.036705	0.43492	0.690747	0.69127	0.445521	0.0384975	-0.17436	-0.254873	-0.276165	-0.297057	-0.300482	-0.304082	-0.296648	-0.304495
0.758578	-0.2948	-0.2896	-0.2966	-0.3032	-0.2992	-0.3208	-0.3026	-0.2982	-0.2972	-0.3102	-0.3066	-0.2976	-0.301	-0.305	-0.3098	-0.2966	-0.2966	-0.3032	-0.296	-0.294198	-0.3018	-0.2944	-0.306598	-0.30719	-0.30298	-0.299955	-0.288065	-0.307268	-0.307567	-0.29594	-0.29954	-0.277612	-0.262113	-0.234678	-0.13471	0.109058	0.489127	0.701704	0.689961	0.504309	0.10258	-0.12334	-0.22311	-0.27228	-0.288917	-0.291135	-0.30222	-0.310542	-0.309287
0.691831	-0.2968	-0.2978	-0.3134	-0.3082	-0.2956	-0.303	-0.302	-0.3048	-0.308	-0.305	-0.3034	-0.305	-0.3034	-0.2962	-0.3024	-0.2964	-0.3036	-0.3014	-0.2982	-0.3068	-0.289797	-0.30099	-0.293795	-0.298967	-0.30116	-0.311472	-0.303745	-0.30462	-0.29952	-0.297513	-0.284315	-0.27485	-0.256122	-0.192085	-0.0767775	0.185227	0.532412	0.689105	0.706501	0.532605	0.189037	-0.089685	-0.198755	-0.26358	-0.27851	-0.283697	-0.29551	-0.308595	-0.305475
0.630957	-0.308	-0.2972	-0.2896	-0.2988	-0.3068	-0.302	-0.3052	-0.2942	-0.3016	-0.2994	-0.307	-0.3104	-0.3012	-0.298	-0.287	-0.3038	-0.2874	-0.3024	-0.304795	-0.3062	-0.3036	-0.308592	-0.300368	-0.306742	-0.301397	-0.298467	-0.286807	-0.295965	-0.302073	-0.297488	-0.288847	-0.274547	-0.23469	-0.171435	-0.0293225	0.254997	0.571712	0.697774	0.696176	0.579642	0.263025	-0.01411	-0.161147	-0.23092	-0.269558	-0.299362	-0.28821	-0.297495	-0.293065
0.57544	-0.3046	-0.3238	-0.289	-0.2976	-0.302	-0.2918	-0.2982	-0.3032	-0.3102	-0.3008	-0.3104	-0.2964	-0.3034	-0.2964	-0.2956	-0.3018	-0.3072	-0.293197	-0.306592	-0.30339	-0.29058	-0.297982	-0.308705	-0.29459	-0.30462	-0.307185	-0.2948	-0.29871	-0.29508	-0.292815	-0.276755	-0.257792	-0.198813	-0.11822	0.05253	0.3391	0.60764	0.696302	0.691643	0.60867	0.338203	0.0508625	-0.121357	-0.19924	-0.256865	-0.28217	-0.28804	-0.2955	-0.298378
0.524807	-0.2944	-0.2988	-0.2978	-0.3004	-0.3028	-0.3066	-0.3034	-0.3026	-0.298	-0.3014	-0.299	-0.288797	-0.3004	-0.299	-0.291	-0.2896	-0.2944	-0.305795	-0.322585	-0.30376	-0.31333	-0.30207	-0.300133	-0.301513	-0.305943	-0.31037	-0.297067	-0.291727	-0.282633	-0.275433	-0.269728	-0.23339	-0.180812	-0.059865	0.135535	0.402828	0.643685	0.703622	0.685986	0.635495	0.412923	0.13837	-0.0813425	-0.179718	-0.232055	-0.267607	-0.274408	-0.295225	-0.29281
0.47863	-0.3012	-0.2856	-0.3056	-0.3052	-0.296	-0.3096	-0.3012	-0.2996	-0.3076	-0.3036	-0.302	-0.309598	-0.3088	-0.308397	-0.295397	-0.29239	-0.303588	-0.295768	-0.299345	-0.305893	-0.304627	-0.30106	-0.297407	-0.30486	-0.299928	-0.30132	-0.294652	-0.297947	-0.273775	-0.258277	-0.240563	-0.21171	-0.138283	0.00083	0.207895	0.46646	0.645188	0.695806	0.699406	0.644153	0.468303	0.214035	-0.004255	-0.12425	-0.206888	-0.24977	-0.2657	-0.277187	-0.288405
0.436516	-0.3098	-0.3022	-0.291797	-0.297	-0.3048	-0.2988	-0.3102	-0.298	-0.3072	-0.2964	-0.3078	-0.298397	-0.296195	-0.298995	-0.30419	-0.311372	-0.305155	-0.299328	-0.30184	-0.305335	-0.30036	-0.29715	-0.311818	-0.303635	-0.28778	-0.289162	-0.28996	-0.280875	-0.26786	-0.25702	-0.22831	-0.165813	-0.0710375	0.0752825	0.294548	0.50641	0.65854	0.697275	0.700143	0.668883	0.51248	0.2936	0.068885	-0.0730575	-0.172182	-0.224302	-0.249248	-0.267335	-0.27985
0.398107	-0.2908	-0.3078	-0.2968	-0.3068	-0.2974	-0.2958	-0.294995	-0.297	-0.293397	-0.304595	-0.315397	-0.30137	-0.31319	-0.29276	-0.304745	-0.290718	-0.304835	-0.289945	-0.309233	-0.291505	-0.303312	-0.306123	-0.291025	-0.297285	-0.303233	-0.29315	-0.283757	-0.269595	-0.25596	-0.23312	-0.195335	-0.1155	-0.013185	0.157922	0.36304	0.546817	0.67514	0.703409	0.703495	0.666743	0.561078	0.36988	0.1485	-0.007605	-0.12204	-0.172805	-0.240723	-0.25578	-0.282722
0.363078	-0.2968	-0.304	-0.291998	-0.310598	-0.308198	-0.306198	-0.311592	-0.29659	-0.30559	-0.30337	-0.29019	-0.312557	-0.294347	-0.29511	-0.29646	-0.306538	-0.294805	-0.306663	-0.301702	-0.29894	-0.304248	-0.300285	-0.306833	-0.29258	-0.288685	-0.293067	-0.273178	-0.258512	-0.22853	-0.202775	-0.14303	-0.0685275	0.0560675	0.21783	0.42909	0.6039	0.682895	0.707657	0.709298	0.675948	0.593427	0.42928	0.22741	0.051445	-0.0543275	-0.14649	-0.19624	-0.233345	-0.25944
0.331131	-0.2978	-0.303	-0.293998	-0.290392	-0.298397	-0.294397	-0.313188	-0.30577	-0.30576	-0.30976	-0.300333	-0.289502	-0.297017	-0.295158	-0.294783	-0.29535	-0.305522	-0.307262	-0.30136	-0.288782	-0.302362	-0.2794	-0.28937	-0.297605	-0.279427	-0.278597	-0.263285	-0.23244	-0.206095	-0.169565	-0.0876975	0.0012875	0.151682	0.31609	0.486055	0.619175	0.688845	0.703701	0.701542	0.692348	0.625332	0.48801	0.316128	0.147505	-0.001315	-0.089195	-0.160438	-0.200187	-0.237003
0.301995	-0.301992	-0.295995	-0.30359	-0.302192	-0.30778	-0.302765	-0.309752	-0.299347	-0.294525	-0.302287	-0.303173	-0.308692	-0.31301	-0.29952	-0.297627	-0.2937	-0.296347	-0.29758	-0.294283	-0.29555	-0.301308	-0.281913	-0.290892	-0.282442	-0.274545	-0.255317	-0.244223	-0.209968	-0.166047	-0.123465	-0.0257925	0.07286	0.21859	0.37839	0.537655	0.637795	0.692605	0.703496	0.699074	0.695225	0.643585	0.540377	0.391018	0.23235	0.081485	-0.0344675	-0.123243	-0.169318	-0.210445
0.275423	-0.29718	-0.29678	-0.308762	-0.296555	-0.302523	-0.30571	-0.294073	-0.300645	-0.30272	-0.297463	-0.298853	-0.300922	-0.304535	-0.304225	-0.293208	-0.290643	-0.294635	-0.3157	-0.29673	-0.291552	-0.291538	-0.28031	-0.273975	-0.263638	-0.240058	-0.232472	-0.210868	-0.173765	-0.129277	-0.0583075	0.0420175	0.153215	0.282712	0.446763	0.572558	0.650265	0.67921	0.70711	0.693303	0.685192	0.649748	0.583788	0.442783	0.30545	0.156707	0.0360825	-0.05735	-0.125977	-0.172745
0.251189	-0.30535	-0.295727	-0.292895	-0.299265	-0.30484	-0.29214	-0.297637	-0.30554	-0.29882	-0.299135	-0.294325	-0.309632	-0.297517	-0.296897	-0.30634	-0.29086	-0.287247	-0.285655	-0.285765	-0.289092	-0.26423	-0.278753	-0.254273	-0.231155	-0.221647	-0.20952	-0.1687	-0.136955	-0.0542075	0.0110475	0.108253	0.232005	0.363115	0.506075	0.605975	0.657702	0.69613	0.688385	0.698593	0.686048	0.664678	0.59865	0.50694	0.37558	0.234022	0.11522	0.00928	-0.0766175	-0.126867
0.229087	-0.303015	-0.302248	-0.296762	-0.316873	-0.309095	-0.295372	-0.30097	-0.30211	-0.29721	-0.288932	-0.292718	-0.301667	-0.29198	-0.293762	-0.29552	-0.289152	-0.30927	-0.27818	-0.28584	-0.282927	-0.266587	-0.256545	-0.247325	-0.224887	-0.19993	-0.176415	-0.141652	-0.07783	-0.0089975	0.092265	0.195463	0.31031	0.432308	0.536682	0.628695	0.671245	0.688222	0.699195	0.693668	0.700115	0.66505	0.61456	0.545215	0.430918	0.31263	0.18756	0.07389	-0.00653	-0.084855
0.20893	-0.29982	-0.3021	-0.303375	-0.303985	-0.296995	-0.300233	-0.303255	-0.292042	-0.296835	-0.286995	-0.295495	-0.288105	-0.291795	-0.287705	-0.287693	-0.28083	-0.276452	-0.268653	-0.266238	-0.27904	-0.253415	-0.23344	-0.219243	-0.204135	-0.166412	-0.127422	-0.0765775	-0.011565	0.0699125	0.16444	0.268323	0.382435	0.497107	0.573568	0.63898	0.67935	0.689357	0.695838	0.70931	0.687222	0.67937	0.64882	0.57253	0.48575	0.37795	0.270717	0.16635	0.070565	-0.0202325
0.190546	-0.298355	-0.30035	-0.290013	-0.297453	-0.29906	-0.300745	-0.306905	-0.305652	-0.292162	-0.291395	-0.298127	-0.296258	-0.280025	-0.28297	-0.273755	-0.27126	-0.268707	-0.263078	-0.245215	-0.252987	-0.227277	-0.212305	-0.195733	-0.155292	-0.121265	-0.0710725	-0.0041225	0.066575	0.15932	0.258657	0.345448	0.44324	0.538918	0.602527	0.654523	0.672543	0.691725	0.681295	0.6975	0.683253	0.686905	0.668848	0.606935	0.534855	0.448155	0.34728	0.245388	0.149657	0.065
0.17378	-0.305393	-0.300275	-0.296473	-0.302577	-0.294388	-0.295457	-0.304098	-0.282245	-0.29057	-0.282973	-0.272225	-0.283432	-0.27555	-0.270967	-0.265898	-0.269622	-0.252078	-0.24431	-0.233313	-0.208358	-0.20554	-0.160705	-0.143767	-0.124412	-0.059395	-0.0118425	0.05995	0.131945	0.225658	0.31311	0.423563	0.495723	0.575242	0.631587	0.650435	0.680505	0.690242	0.703915	0.707533	0.69779	0.684902	0.663035	0.635112	0.58391	0.500308	0.412533	0.325908	0.227745	0.13763
0.158489	-0.287272	-0.289168	-0.29791	-0.294752	-0.285647	-0.292662	-0.291745	-0.29224	-0.282708	-0.270505	-0.2821	-0.276952	-0.258885	-0.262553	-0.255833	-0.242553	-0.234228	-0.217963	-0.195568	-0.18047	-0.154252	-0.135285	-0.08657	-0.0506375	0.0039325	0.0764075	0.139503	0.210317	0.30408	0.383352	0.478307	0.540022	0.60252	0.642105	0.677068	0.688612	0.700283	0.701325	0.709122	0.696348	0.682865	0.678547	0.651872	0.600823	0.554345	0.46653	0.3868	0.294565	0.217823
0.144544	-0.296073	-0.291438	-0.288245	-0.28994	-0.291145	-0.29711	-0.271225	-0.27274	-0.27821	-0.26754	-0.254815	-0.26055	-0.249995	-0.242517	-0.237705	-0.22094	-0.19652	-0.195105	-0.15666	-0.142233	-0.111727	-0.06701	-0.03161	0.0185525	0.0818475	0.15297	0.21735	0.29253	0.365833	0.44671	0.520235	0.580758	0.631737	0.668268	0.677617	0.70323	0.699703	0.692128	0.689333	0.693653	0.695545	0.68349	0.663375	0.632027	0.579045	0.522787	0.45084	0.36944	0.302237
0.131826	-0.280977	-0.293822	-0.281655	-0.277855	-0.283027	-0.274027	-0.27236	-0.270228	-0.27302	-0.249218	-0.251645	-0.2404	-0.22513	-0.210155	-0.210883	-0.175625	-0.159305	-0.13599	-0.108365	-0.0683125	-0.0467725	-0.02065	0.04232	0.105862	0.159942	0.229843	0.293803	0.376402	0.434408	0.503955	0.55883	0.60959	0.644305	0.657345	0.694002	0.692275	0.70562	0.696157	0.692555	0.709912	0.690515	0.693963	0.688265	0.64942	0.618385	0.560913	0.499368	0.44022	0.36804
0.120226	-0.273662	-0.28205	-0.283725	-0.26083	-0.262732	-0.258348	-0.25327	-0.25482	-0.240613	-0.232235	-0.235063	-0.206352	-0.192155	-0.184638	-0.164465	-0.139192	-0.12177	-0.0969125	-0.0622375	-0.017195	0.020555	0.0597925	0.119835	0.183927	0.235835	0.305372	0.362573	0.433412	0.48772	0.541732	0.59899	0.636822	0.673283	0.67677	0.691527	0.697677	0.698715	0.690965	0.702958	0.681245	0.69057	0.68013	0.682295	0.660183	0.6333	0.587325	0.561925	0.49069	0.45195
0.109648	-0.27873	-0.261562	-0.262087	-0.259595	-0.253368	-0.244195	-0.235445	-0.22282	-0.214482	-0.207668	-0.196892	-0.173595	-0.158977	-0.136398	-0.115678	-0.1038	-0.05765	-0.0242075	0.0096875	0.044575	0.104728	0.143115	0.197738	0.270425	0.321905	0.379352	0.415832	0.485183	0.53006	0.59111	0.63095	0.652125	0.666327	0.680575	0.695375	0.69952	0.704165	0.70658	0.70097	0.69994	0.70423	0.680555	0.67498	0.674545	0.653335	0.619568	0.59432	0.537793	0.49323
0.1	-0.25589	-0.246515	-0.230665	-0.225375	-0.23151	-0.226508	-0.208272	-0.186672	-0.174902	-0.171332	-0.15235	-0.134403	-0.111037	-0.0801025	-0.0534725	-0.026995	6.75e-05	0.033665	0.0749075	0.123842	0.184465	0.225488	0.282205	0.321862	0.398562	0.43879	0.490783	0.540735	0.582385	0.618958	0.644822	0.661105	0.683787	0.672928	0.701045	0.682155	0.695925	0.700775	0.700972	0.694723	0.706995	0.698523	0.679227	0.672775	0.665837	0.641193	0.619158	0.567152	0.528382
[truncated: 2 more columns]
