# Supplementary material for: Exploiting the mediating role of the metabolome to unravel transcript-to-phenotype associations
Source: eLife. 2023 Mar 9;12:e81097. doi: 10.7554/eLife.81097 (PMC9998083; doi:10.7554/eLife.81097)
Supplement: Supplementary file 1. — a. Annotation of metabolites measured in Shin et al., 2014 with Human Metabolome Database (HMDB) identifiers. b. Significant transcript-to-metabolite causal effects (FDR 5%) identified through univariable Mendelian randomization. Both original effects (ORIGINAL) and those after excluding outliers (N_outlier) are reported. The FDR column reports the adjusted p-value used to select significant associations (FDR ≤0.05). The HMDB and PubMed columns indicate the PMID of publications reporting a link between the tested transcript and metabolite, as identified per automated literature review, with ‘1*’ indicating associations reported without referencing a specific publication. c. List of the 28 medically relevant phenotypes assessed in this study. d. Significant metabolite-to-phenotype causal effects (FDR 5%) identified through univariable metabolome-wide Mendelian randomization (MWMR). Both original effects (ORIGINAL) and those after excluding outliers (N_outlier) are reported. The FDR column reports the adjusted p-value used to select significant associations (FDR ≤0.05). e. Significant transcript-to-phenotype causal effects (FDR 5%) identified through univariable transcriptome-wide Mendelian randomization (TWMR). Both original effects (ORIGINAL) and those after excluding outliers (N_outlier) are reported. The FDR column reports the adjusted p-value used to select significant associations (FDR ≤0.05). f. Identified causal transcript-metabolite-phenotype triplets. Effect size and p-value for the transcript-to-metabolite, metabolite-to-phenotype, and transcript-to-phenotype relations among the 216 identified causal triplets, along with estimated direct and indirect effects. Rows colored in beige were identified by our automated literature review of transcript-to-metabolite pairs and were subjected to an automated literature review of the transcript-phenotype relation. The PubMed column reports the PMID of publications identified per automated literature review for the inv [file elife-81097-supp1.xlsx]

## Sheet: SF1a
Shin_ID	Metabolite	HMDB_ID
M01105	linoleate (18:2n6)	HMDB0000673
M01107	allantoin	HMDB0000462
M01110	arachidonate (20:4n6)	HMDB0001043
M01114	deoxycholate	HMDB0000626
M01121	margarate (17:0)	HMDB0002259
M01123	inosine	HMDB0000195
M01125	isoleucine	HMDB0000172
M11438	phosphate	HMDB0001429
M12017	3-methoxytyrosine	HMDB0001434
M12035	pelargonate (9:0)	HMDB0000847
M12067	undecanoate (11:0)	HMDB0000947
M12129	beta-hydroxyisovalerate	HMDB0000754
M12261	taurodeoxycholate	HMDB0000896
M01284	threonine	HMDB0000167
M01299	tyrosine	HMDB0000158
M01301	lysine	HMDB0000182
M01302	methionine	HMDB0000696
M01303	malate	HMDB0000156
M01336	palmitate (16:0)	HMDB0000220
M01356	nonadecanoate (19:0)	HMDB0000772
M01358	stearate (18:0)	HMDB0000827
M01359	oleate (18:1n9)	HMDB0000207
M01361	pentadecanoate (15:0)	HMDB0000826
M01365	myristate (14:0)	HMDB0000806
M01444	pipecolate	HMDB0000070
M01493	ornithine	HMDB0000214
M01494	5-oxoproline	HMDB0000267
M01508	pantothenate	HMDB0000210
M15122	glycerol	HMDB0000131
M15140	kynurenine	HMDB0000684
M15335	mannitol	HMDB0000765
M15365	glycerol 3-phosphate (G3P)	HMDB0000126
M15488	acetylphosphate	HMDB0001494
M15500	carnitine	HMDB0000062
M15506	choline	HMDB0000097
M01558	4-acetamidobutanoate	HMDB0003681
M01561	alpha-tocopherol	HMDB0001893
M15630	N-acetylornithine	HMDB0003357
M01564	citrate	HMDB0000094
M15650	N1-methyladenosine	HMDB0003331
M15676	3-methyl-2-oxovalerate	HMDB0000491
M15677	3-methylhistidine	HMDB0000479
M01572	glycerate	HMDB0000139
M01573	guanosine	HMDB0000133
M15749	3-phenylpropionate (hydrocinnamate)	HMDB0000764
M01585	N-acetylalanine	HMDB0000766
M15958	phenylacetate	HMDB0000209
M15990	glycerophosphorylcholine (GPC)	HMDB0000086
M15996	aspartate	HMDB0000191
M01604	urate	HMDB0000289
M01605	ursodeoxycholate	HMDB0000946
M01638	arginine	HMDB0000517
M01640	ascorbate (Vitamin C)	HMDB0000044
M01644	heptanoate (7:0)	HMDB0000666
M01645	laurate (12:0)	HMDB0000638
M01649	valine	HMDB0000883
M01670	urea	HMDB0000294
M01712	cortisol	HMDB0000063
M01769	cortisone	HMDB0002802
M17805	dihomo-linoleate (20:2n6)	HMDB0005060
M17945	2-hydroxystearate	HMDB0062549
M18349	indolelactate	HMDB0000671
M18357	glycylvaline	HMDB0028854
M18369	gamma-glutamylleucine	HMDB0011171
M18467	eicosapentaenoate (EPA; 20:5n3)	HMDB0001999
M18474	estrone 3-sulfate	HMDB0001425
M18476	glycocholate	HMDB0000138
M18477	glycodeoxycholate	HMDB0000631
M18494	taurochenodeoxycholate	HMDB0000951
M18497	taurocholate	HMDB0000036
M01898	proline	HMDB0000162
M19323	docosahexaenoate (DHA; 22:6n3)	HMDB0002183
M19324	1-stearoylglycerophosphoinositol	HMDB0240261
M19934	myo-inositol	HMDB0000211
M20489	glucose	HMDB0000122
M20675	1,5-anhydroglucitol (1,5-AG)	HMDB0002712
M21044	2-hydroxybutyrate (AHB)	HMDB0000008
M21047	3-methyl-2-oxobutyrate	HMDB0000019
M21049	1,6-anhydroglucose	HMDB0000640
M21127	1-palmitoylglycerol (1-monopalmitin)	HMDB0011564
M21184	1-oleoylglycerol (1-monoolein)	HMDB0011567
M21188	1-stearoylglycerol (1-monostearin)	HMDB0011131
M02132	citrulline	HMDB0000904
M02137	biliverdin	HMDB0001008
M22030	2-hydroxyisobutyrate	HMDB0242161
M22116	4-methyl-2-oxopentanoate	HMDB0000695
M22130	phenyllactate (PLA)	HMDB0000779
M22138	homocitrulline	HMDB0000679
M22175	aspartylphenylalanine	HMDB0000706
M22177	levulinate (4-oxovalerate)	HMDB0000720
M22189	palmitoylcarnitine	HMDB0000222
M22842	cholate	HMDB0000619
M02342	serotonin (5HT)	HMDB0000259
M02730	gamma-glutamylglutamine	HMDB0011738
M02734	gamma-glutamyltyrosine	HMDB0011741
M27447	1-linoleoylglycerol (1-monolinolein)	HMDB0242115
M27513	indoleacetate	HMDB0000197
M27531	hyodeoxycholate	HMDB0000733
M27672	3-indoxyl sulfate	HMDB0000682
M27710	N-acetylglycine	HMDB0000532
M27716	bilirubin (Z,Z)	HMDB0000054
M27718	creatine	HMDB0000064
M27722	erythrose	HMDB0002649
M27738	threonate	HMDB0000943
M03127	hypoxanthine	HMDB0000157
M03141	betaine	HMDB0000043
M31453	cysteine	HMDB0000574
M03147	xanthine	HMDB0000292
M31522	pyroglutamylglycine	HMDB0061890
M31536	N-(2-furoyl)glycine	HMDB0000439
M31555	pyridoxate	HMDB0000017
M31591	androsterone sulfate	HMDB0002759
M31787	3-carboxy-4-methyl-5-propyl-2-furanpropanoate (CMPF)	HMDB0061112
M32197	3-(4-hydroxyphenyl)lactate	HMDB0000755
M32198	acetylcarnitine	HMDB0000201
M32315	serine	HMDB0000187
M32319	trans-4-hydroxyproline	HMDB0000725
M32322	glutamate	HMDB0000148
M32328	hexanoylcarnitine	HMDB0000756
M32338	glycine	HMDB0000123
M32339	alanine	HMDB0000161
M32346	glycochenodeoxycholate	HMDB0000637
M32348	2-aminobutyrate	HMDB0000452
M32379	scyllo-inositol	HMDB0006088
M32388	dodecanedioate	HMDB0000623
M32393	gamma-glutamylvaline	HMDB0011172
M32405	indolepropionate	HMDB0002302
M32412	butyrylcarnitine	HMDB0002013
M32418	myristoleate (14:1n5)	HMDB0002000
M32425	dehydroisoandrosterone sulfate (DHEA-S)	HMDB0001032
M32452	propionylcarnitine	HMDB0000824
M32489	caproate (6:0)	HMDB0000535
M32492	caprylate (8:0)	HMDB0000482
M32497	10-undecenoate (11:1n1)	HMDB0033724
M32504	docosapentaenoate (n3 DPA; 22:5n3)	HMDB0006528
M32553	phenol sulfate	HMDB0060015
M32586	bilirubin (E,E)*	HMDB0240584
M32593	heme*	HMDB0003178
M32635	1-linoleoylglycerophosphoethanolamine*	HMDB0011507
M32654	3-dehydrocarnitine*	HMDB0012154
M32672	pyroglutamine*	HMDB0062558
M32675	C-glycosyltryptophan*	HMDB0240296
M32980	adrenate (22:4n6)	HMDB0002226
M33009	homostachydrine*	HMDB0004827
M33228	1-arachidonoylglycerophosphocholine*	HMDB0010395
M33230	1-palmitoleoylglycerophosphocholine*	HMDB0010383
M33363	gamma-glutamylmethionine*	HMDB0034367
M33364	gamma-glutamylthreonine*	HMDB0029159
M33420	gamma-tocopherol	HMDB0001492
M33422	gamma-glutamylphenylalanine	HMDB0000594
M33441	isobutyrylcarnitine	HMDB0000736
M33442	pseudouridine	HMDB0000767
M33443	valerate	HMDB0000892
M33447	palmitoleate (16:1n7)	HMDB0003229
M33453	alpha-ketoglutarate	HMDB0000208
M33477	erythronate*	HMDB0000613
M33488	lathosterol	HMDB0001170
M33587	eicosenoate (20:1n9 or 11)	HMDB0002231
M33822	1-docosahexaenoylglycerophosphocholine*	HMDB0010404
M33871	1-eicosadienoylglycerophosphocholine*	HMDB0010392
M33936	octanoylcarnitine	HMDB0000791
M33937	alpha-hydroxyisovalerate	HMDB0000407
M33939	N-acetylthreonine	HMDB0062557
M33941	decanoylcarnitine	HMDB0000651
M33955	1-palmitoylglycerophosphocholine	HMDB0010382
M33957	1-heptadecanoylglycerophosphocholine	HMDB0012108
M33960	1-oleoylglycerophosphocholine	HMDB0002815
M33961	1-stearoylglycerophosphocholine	HMDB0010384
M33968	5-dodecenoate (12:1n7)	HMDB0000529
M33969	stearidonate (18:4n3)	HMDB0006547
M33971	10-heptadecenoate (17:1n7)	HMDB0060038
M33972	10-nonadecenoate (19:1n9)	HMDB0013622
M33973	epiandrosterone sulfate	HMDB0062657
M34035	linolenate [alpha or gamma; (18:3n3 or 6)]	HMDB0001388, HMDB0003073
M34106	bilirubin (E,Z or Z,E)*	HMDB0000488
M34214	1-arachidonoylglycerophosphoinositol*	HMDB0061690
M34283	asparagine	HMDB0000168
M34384	stachydrine	HMDB0004827
M34407	isovalerylcarnitine	HMDB0000688
M34409	stearoylcarnitine	HMDB0000848
M34416	1-stearoylglycerophosphoethanolamine	HMDB0011130
M34419	1-linoleoylglycerophosphocholine	HMDB0010386
M34420	bradykinin, des-arg(9)	HMDB0004246
M34456	gamma-glutamylisoleucine*	HMDB0011170
M34534	laurylcarnitine	HMDB0002250
M34732	isovalerate	HMDB0000718
M35114	7-methylguanine	HMDB0000897
M35126	phenylacetylglutamine	HMDB0006344
M35127	pro-hydroxy-pro	HMDB0006695
M35137	N2,N2-dimethylguanosine	HMDB0004824
M35159	cysteine-glutathione disulfide	HMDB0000656, HMDB0250707
M35160	oleoylcarnitine	HMDB0005065
M35186	1-arachidonoylglycerophosphoethanolamine*	HMDB0011517
M35253	2-palmitoylglycerophosphocholine*	HMDB0240262
M35255	2-stearoylglycerophosphocholine*	HMDB0011128
M35305	1-palmitoylglycerophosphoinositol*	HMDB0061695
M35431	2-methylbutyroylcarnitine	HMDB0000378
M35433	hydroxyisovaleroyl carnitine	HMDB0062555
M35439	glutaroyl carnitine	HMDB0013130
M35472	2-tetradecenoyl carnitine	HMDB0013329
M35527	4-hydroxyhippurate	HMDB0013678
M35626	1-myristoylglycerophosphocholine	HMDB0010379
M35628	1-oleoylglycerophosphoethanolamine	HMDB0011506
M35631	1-palmitoylglycerophosphoethanolamine	HMDB0011503
M35635	3-(3-hydroxyphenyl)propionate	HMDB0000375
M35669	tetradecanedioate	HMDB0000872
M35675	2-hydroxypalmitate	HMDB0031057
M35678	hexadecanedioate	HMDB0304377
M35718	dihomo-linolenate (20:3n3 or n6)	HMDB0002925, HMDB0060039
M35854	threitol	HMDB0004136
M36103	p-cresol sulfate	HMDB0011635
M36738	gamma-glutamylglutamate	HMDB0011737
M36754	octadecanedioate	HMDB0000782
M36756	leucylleucine	HMDB0028933
M36776	7-alpha-hydroxy-3-oxo-4-cholestenoate (7-Hoca)	HMDB0012458
M36802	n-Butyl Oleate	HMDB0062659
M36808	dimethylarginine (SDMA + ADMA)	HMDB0001539, HMDB0003334
M36850	taurolithocholate 3-sulfate	HMDB0002580
M37058	succinylcarnitine	HMDB0061717
M37097	tryptophan betaine	HMDB0061115
M37104	cyclo(leu-pro)	HMDB0034276
M37112	chiro-inositol	HMDB0240209
M37253	2-hydroxyglutarate	HMDB0000694
M37459	ergothioneine	HMDB0003045
M37506	palmitoyl sphingomyelin	HMDB0010169
M38150	phenylalanylphenylalanine	HMDB0013302
M38178	cis-4-decenoyl carnitine	HMDB0240585
M38768	15-methylpalmitate (isobar with 2-methylpalmitate)	HMDB0061709
M00513	creatinine	HMDB0000562
M00527	lactate	HMDB0000190
M00053	glutamine	HMDB0000641
M00054	tryptophan	HMDB0000929
M00542	3-hydroxybutyrate (BHBA)	HMDB0000011
M00575	arabinose	HMDB0000646
M00577	fructose	HMDB0000660
M00584	mannose	HMDB0000169
M00059	histidine	HMDB0000177
M00599	pyruvate	HMDB0000243
M00060	leucine	HMDB0000687
M00606	uridine	HMDB0000296
M00063	cholesterol	HMDB0000067
M00064	phenylalanine	HMDB0000159

## Sheet: SF1b
Shin_ID	Metabolite	Gene_ID	Gene	alpha_ORIGINAL	SE_ORIGINAL	P_ORIGINAL	N_ORIGINAL	P_het_ORIGINAL	alpha	SE	P	N	P_het	N_outlier	minGWAS	FDR	HMDB	PubMed
M33228	1-arachidonoylglycerophosphocholine*	ENSG00000134824	FADS2	-0.60227	0.056767	2.691e-26	12	0.0010984	-0.62934	0.03787	5.1311e-62	10	0.25605	2	6.9905e-90	3.26285e-56
M33228	1-arachidonoylglycerophosphocholine*	ENSG00000134825	TMEM258	-1.0217	0.05366	7.9691e-81	6	0.72257	-1.0217	0.05366	7.9691e-81	6	0.72257	0	4.5912e-78	7.60129e-75
M33228	1-arachidonoylglycerophosphocholine*	ENSG00000149485	FADS1	-0.40567	0.066623	1.1353e-09	8	0.01342	-0.3855	0.049189	4.6124e-15	7	0.21735	1	2.2152e-21	2.93301e-10
M35186	1-arachidonoylglycerophosphoethanolamine*	ENSG00000134824	FADS2	-0.37419	0.042448	1.1935e-18	12	0.067687	-0.37419	0.042448	1.1935e-18	12	0.067687	0	3.87e-40	1.33931e-13
M35186	1-arachidonoylglycerophosphoethanolamine*	ENSG00000134825	TMEM258	-0.68304	0.053235	1.1031e-37	6	0.4881	-0.68304	0.053235	1.1031e-37	6	0.4881	0	3.8355e-35	3.50729e-32
M35186	1-arachidonoylglycerophosphoethanolamine*	ENSG00000142606	MMEL1	-0.15548	0.031725	9.5461e-07	3	0.64857	-0.15548	0.031725	9.5461e-07	3	0.64857	0	2.8229e-05	0.0189698
M35186	1-arachidonoylglycerophosphoethanolamine*	ENSG00000149485	FADS1	-0.32866	0.090876	0.00029851	10	1.7855e-06	-0.29855	0.056706	1.4028e-07	7	0.068691	3	7.2443e-13	0.00376917
M34214	1-arachidonoylglycerophosphoinositol*	ENSG00000134824	FADS2	-0.27559	0.0341	6.38e-16	12	0.30638	-0.27559	0.0341	6.38e-16	12	0.30638	0	6.3755e-23	4.7762e-11
M34214	1-arachidonoylglycerophosphoinositol*	ENSG00000134825	TMEM258	-0.51382	0.059771	8.2207e-18	6	0.32004	-0.51382	0.059771	8.2207e-18	6	0.32004	0	1.77e-21	7.93475e-13
M34214	1-arachidonoylglycerophosphoinositol*	ENSG00000167608	TMC4	0.28035	0.030723	7.1713e-20	6	0.59715	0.28035	0.030723	7.1713e-20	6	0.59715	0	3.7592e-18	9.12041e-15
M33871	1-eicosadienoylglycerophosphocholine*	ENSG00000134824	FADS2	0.17813	0.044381	5.9799e-05	12	0.039964	0.18853	0.036589	2.5681e-07	11	0.24799	1	2.7259e-08	0.00653218
M33871	1-eicosadienoylglycerophosphocholine*	ENSG00000134825	TMEM258	0.23352	0.089615	0.0091655	6	0.033663	0.27755	0.056455	8.8237e-07	4	0.53788	2	2.8331e-06	0.018063
M32635	1-linoleoylglycerophosphoethanolamine*	ENSG00000134824	FADS2	0.36406	0.037519	2.9179e-22	12	0.15906	0.36406	0.037519	2.9179e-22	12	0.15906	0	2.2758e-35	3.97603e-17
M32635	1-linoleoylglycerophosphoethanolamine*	ENSG00000134825	TMEM258	0.59247	0.080286	1.5886e-13	6	0.083116	0.59247	0.080286	1.5886e-13	6	0.083116	0	3.7547e-33	8.9134e-09
M32635	1-linoleoylglycerophosphoethanolamine*	ENSG00000149485	FADS1	0.28686	0.039172	2.4236e-13	9	0.50418	0.28686	0.039172	2.4236e-13	9	0.50418	0	6.2965e-11	1.2843e-08
M33960	1-oleoylglycerophosphocholine	ENSG00000172992	DCAKD	-0.25678	0.050952	4.6657e-07	9	0.21641	-0.25678	0.050952	4.6657e-07	9	0.21641	0	5.4836e-05	0.0109885
M21188	1-stearoylglycerol (1-monostearin)	ENSG00000104936	DMPK	-0.28336	0.060401	2.7156e-06	3	0.59935	-0.28336	0.060401	2.7156e-06	3	0.59935	0	1.847e-06	0.0405465
M21188	1-stearoylglycerol (1-monostearin)	ENSG00000185800	DMWD	-0.32938	0.069759	2.3391e-06	4	0.49614	-0.32938	0.069759	2.3391e-06	4	0.49614	0	1.5373e-06	0.0374981
M20675	1,5-anhydroglucitol (1,5-AG)	ENSG00000076003	MCM6	-0.44146	0.044553	3.8217e-23	7	0.26859	-0.44146	0.044553	3.8217e-23	7	0.26859	0	9.2257e-13	6.07552e-18		28588231
M20675	1,5-anhydroglucitol (1,5-AG)	ENSG00000115866	DARS	-0.26322	0.071802	0.00024646	7	0.00027457	-0.23539	0.038412	8.9068e-10	5	0.26328	2	1.6027e-09	3.37287e-05
M20675	1,5-anhydroglucitol (1,5-AG)	ENSG00000226806	AC011893.3	-0.19575	0.030053	7.3442e-11	5	0.021405	-0.18555	0.021071	1.2939e-18	4	0.21098	1	3.0244e-17	1.37131e-13
M32497	10-undecenoate (11:1n1)	ENSG00000125818	PSMF1	-0.43277	0.088491	1.0053e-06	5	0.82443	-0.43277	0.088491	1.0053e-06	5	0.82443	0	9.1681e-06	0.0195694
M32348	2-aminobutyrate	ENSG00000115902	SLC1A4	0.29726	0.050975	5.4899e-09	8	0.63053	0.29726	0.050975	5.4899e-09	8	0.63053	0	1.0776e-08	0.00017455		28630707
M32348	2-aminobutyrate	ENSG00000062650	WAPAL	0.61123	0.12187	5.2869e-07	3	0.99987	0.61123	0.12187	5.2869e-07	3	0.99987	0	3.1654e-06	0.0121515
M22030	2-hydroxyisobutyrate	ENSG00000158104	HPD	-0.31511	0.037071	1.8946e-17	4	0.41776	-0.31511	0.037071	1.8946e-17	4	0.41776	0	1.2976e-16	1.64287e-12
M35675	2-hydroxypalmitate	ENSG00000121413	ZSCAN18	-0.22909	0.048296	2.1012e-06	6	0.7394	-0.22909	0.048296	2.1012e-06	6	0.7394	0	0.00013838	0.0354729
M35255	2-stearoylglycerophosphocholine*	ENSG00000172992	DCAKD	-0.21713	0.043867	7.4305e-07	9	0.45076	-0.21713	0.043867	7.4305e-07	9	0.45076	0	0.00012393	0.0157501
M32197	3-(4-hydroxyphenyl)lactate	ENSG00000169710	FASN	-0.33356	0.048598	6.7102e-12	3	0.89226	-0.33356	0.048598	6.7102e-12	3	0.89226	0	1.1503e-11	3.04785e-07
M32197	3-(4-hydroxyphenyl)lactate	ENSG00000176155	CCDC57	0.34433	0.054862	3.4685e-10	3	0.34636	0.34433	0.054862	3.4685e-10	3	0.34636	0	9.0883e-11	1.40783e-05
M32654	3-dehydrocarnitine*	ENSG00000134184	GSTM1	0.15714	0.026624	3.5888e-09	21	0.31	0.15714	0.026624	3.5888e-09	21	0.31	0	4.735e-07	0.00011804
M32654	3-dehydrocarnitine*	ENSG00000261015	RP1-90J20.11	0.10057	0.020943	1.5713e-06	8	0.78872	0.10057	0.020943	1.5713e-06	8	0.78872	0	0.0039821	0.0280145
M00542	3-hydroxybutyrate (BHBA)	ENSG00000136842	TMOD1	-0.32304	0.06873	2.5999e-06	3	0.94196	-0.32304	0.06873	2.5999e-06	3	0.94196	0	1.2758e-05	0.0403236
M15676	3-methyl-2-oxovalerate	ENSG00000133678	TMEM254	0.20292	0.04112	8.0238e-07	7	0.48722	0.20292	0.04112	8.0238e-07	7	0.48722	0	0.003307	0.0168208
M15677	3-methylhistidine	ENSG00000169397	RNASE3	-0.1895	0.038793	1.035e-06	8	0.74618	-0.1895	0.038793	1.035e-06	8	0.74618	0	0.0011421	0.019944
M01558	4-acetamidobutanoate	ENSG00000111452	GPR133	-0.23304	0.04692	6.8082e-07	7	0.89306	-0.23304	0.04692	6.8082e-07	7	0.89306	0	0.0065148	0.0146888
M22116	4-methyl-2-oxopentanoate	ENSG00000102763	VWA8	-0.37833	0.0809	2.9169e-06	4	0.66645	-0.37833	0.0809	2.9169e-06	4	0.66645	0	0.0013456	0.0428042
M01494	5-oxoproline	ENSG00000178719	GRINA	0.24686	0.046004	8.0511e-08	4	0.1807	0.24686	0.046004	8.0511e-08	4	0.1807	0	1.8842e-12	0.00236292
M01494	5-oxoproline	ENSG00000179632	MAF1	0.79263	0.039063	1.541e-91	3	0.61779	0.79263	0.039063	1.541e-91	3	0.61779	0	3.2523e-86	2.93975e-85
M01494	5-oxoproline	ENSG00000179698	KIAA1875	0.67721	0.11126	1.1515e-09	5	0.0001629	0.74747	0.092516	6.5095e-16	3	0.010548	2	1.3793e-97	4.7762e-11
M32980	adrenate (22:4n6)	ENSG00000134824	FADS2	-0.29762	0.045272	4.8953e-11	12	0.0238	-0.32392	0.032354	1.3542e-23	11	0.39528	1	3.8982e-24	2.58339e-18		32682282;32534376;24067669
M32980	adrenate (22:4n6)	ENSG00000134825	TMEM258	-0.49315	0.065186	3.8684e-14	6	0.22079	-0.49315	0.065186	3.8684e-14	6	0.22079	0	1.2105e-20	2.30616e-09
M31591	androsterone sulfate	ENSG00000146833	TRIM4	0.12489	0.058185	0.031833	9	2.9695e-06	0.2362	0.024125	1.235e-22	5	0.53311	4	1.4245e-21	1.81231e-17
M01110	arachidonate (20:4n6)	ENSG00000134824	FADS2	-0.53248	0.054855	2.812e-22	12	0.0021264	-0.57249	0.038659	1.2835e-49	9	0.20169	3	8.0173e-77	6.1213e-44		35779418;35580802;35268031;35051193;34951591;34937850;34836252;34229738;34076000;34052410;34036355;33530084;33526157;33414988;33310680;33243305;33131141;33011673;32682282;32584610;32534376;32375154;32272092;32222967;32123295;31888468;31638497;31589250;31564377;31532795;31292513;31167809;30954631;30927246;30732887;30511301;30293059;30290221;30254373;30170993;30050886;29937909;29886893;29746616;293…
M01110	arachidonate (20:4n6)	ENSG00000149485	FADS1	-0.48135	0.072279	2.7462e-11	9	0.0017337	-0.45485	0.052919	8.3187e-18	7	0.14714	2	2.1926e-32	7.93475e-13		36147256;36090567;36046053;35701670;35631303;35490599;35268031;35182678;35051193;34937850;34836252;34718859;34189740;34076000;34052410;34036355;33548080;33530084;33526157;33396458;33331250;33310680;33288688;33243305;33199044;33038834;32682282;32584610;32534376;32375154;32332698;32186652;32167131;32123295;31888468;31690987;31638497;31589250;31564377;31492428;31488602;31292513;30954631;30927246;307…
M01110	arachidonate (20:4n6)	ENSG00000134825	TMEM258	-0.95376	0.072899	4.1064e-39	6	0.17692	-0.95376	0.072899	4.1064e-39	6	0.17692	0	1.5202e-73	1.56675e-33
M34283	asparagine	ENSG00000037474	NSUN2	-0.11264	0.024267	3.4565e-06	17	0.9967	-0.11264	0.024267	3.4565e-06	17	0.9967	0	1.1699e-05	0.0495784
M03141	betaine	ENSG00000111181	SLC6A12	-0.37379	0.06971	8.224e-08	7	0.64011	-0.37379	0.06971	8.224e-08	7	0.64011	0	1.631e-07	0.0023771	11380820	32213983;31830527;31108110;29554320;29175673;26690518;26182429;24795654;24429811;23378610;22554511;22489112;22071246;21459558;20597903
M03141	betaine	ENSG00000152409	JMY	0.2901	0.054627	1.0933e-07	4	0.33436	0.2901	0.054627	1.0933e-07	4	0.33436	0	7.7098e-10	0.00302272
M34420	bradykinin, des-arg(9)	ENSG00000164344	KLKB1	-0.22389	0.089131	0.012008	11	1.1175e-05	-0.30964	0.063674	1.1565e-06	7	0.05661	4	1.9359e-10	0.021844	1*	35930434;35873600;35812405;35458690;34566641;31451224;29130992;27200353;26566265;25979073;25339356;24759141;24278376;23676986;23381795
M32412	butyrylcarnitine	ENSG00000135114	OASL	-0.41778	0.085489	1.0243e-06	7	0.0055237	-0.42068	0.071962	5.0413e-09	5	0.089383	2	2.3747e-23	0.000163004
M15500	carnitine	ENSG00000018280	SLC11A1	-0.17477	0.037037	2.3721e-06	9	0.76408	-0.17477	0.037037	2.3721e-06	9	0.76408	0	1.8388e-06	0.0377103
M15500	carnitine	ENSG00000129295	LRRC6	-0.12435	0.026504	2.7096e-06	15	0.80176	-0.12435	0.026504	2.7096e-06	15	0.80176	0	6.4516e-05	0.0405465
M15500	carnitine	ENSG00000141279	NPEPPS	-0.40847	0.087871	3.3428e-06	4	0.30003	-0.40847	0.087871	3.3428e-06	4	0.30003	0	1.5646e-08	0.0483108
M15500	carnitine	ENSG00000146215	CRIP3	0.48598	0.085638	1.3879e-08	4	0.77463	0.48598	0.085638	1.3879e-08	4	0.77463	0	1.8625e-07	0.000434046
M15500	carnitine	ENSG00000198933	TBKBP1	-0.18525	0.03698	5.4585e-07	10	0.25245	-0.18525	0.03698	5.4585e-07	10	0.25245	0	1.5646e-08	0.0123966
M15500	carnitine	ENSG00000228782	MRPL45P2	0.20919	0.037223	1.9104e-08	3	0.66536	0.20919	0.037223	1.9104e-08	3	0.66536	0	1.8625e-07	0.000587815
M00063	cholesterol	ENSG00000134222	PSRC1	-0.20115	0.039587	3.7528e-07	9	0.40664	-0.20115	0.039587	3.7528e-07	9	0.40664	0	6.6257e-08	0.00917843		35690006;35613310;35291603;35252377;33810964;33296721;31969989;31838625;31249592;30902787;30740535;29930724;29378206;28082259;27943270;26464717;25702058;25350695;24991929;24674750;24622110;24005217;23100282;23098650;22623978;21977987;21860704;20839009;20816088;20442857;20370913;20031591;19951432;19487539;18649068;18193044
M01564	citrate	ENSG00000154122	ANKH	-0.30099	0.063611	2.2272e-06	5	0.28818	-0.30099	0.063611	2.2272e-06	5	0.28818	0	5.4374e-10	0.0366276		33824377;32639996;31262251
M01564	citrate	ENSG00000180992	MRPL14	-0.29668	0.05933	5.7198e-07	5	0.2987	-0.29668	0.05933	5.7198e-07	5	0.2987	0	3.3596e-07	0.0126879
M01769	cortisone	ENSG00000197249	SERPINA1	0.17443	0.03618	1.4263e-06	10	0.51946	0.17443	0.03618	1.4263e-06	10	0.51946	0	0.00029271	0.0259137
M01769	cortisone	ENSG00000226002	RP11-460N20.5	0.081249	0.017273	2.5519e-06	7	0.48211	0.081249	0.017273	2.5519e-06	7	0.48211	0	8.0316e-06	0.0399036
M01769	cortisone	ENSG00000228409	CCT6P1	-0.1638	0.03221	3.6668e-07	3	0.86222	-0.1638	0.03221	3.6668e-07	3	0.86222	0	0.00016925	0.00908457
M01769	cortisone	ENSG00000234585	CCT6P3	0.12572	0.025685	9.855e-07	3	0.41219	0.12572	0.025685	9.855e-07	3	0.41219	0	3.9095e-05	0.0193817
M33941	decanoylcarnitine	ENSG00000171503	ETFDH	-0.51884	0.12288	2.417e-05	6	0.016781	-0.64413	0.058856	7.0855e-28	5	0.3285	1	2.0732e-37	1.93099e-22
M32425	dehydroisoandrosterone sulfate (DHEA-S)	ENSG00000187624	C17orf97	0.16878	0.035646	2.1927e-06	12	0.83956	0.16878	0.035646	2.1927e-06	12	0.83956	0	0.013573	0.0363738
M32425	dehydroisoandrosterone sulfate (DHEA-S)	ENSG00000196652	ZKSCAN5	0.46469	0.063119	1.8108e-13	3	0.86244	0.46469	0.063119	1.8108e-13	3	0.86244	0	2.9058e-13	9.86984e-09
M35718	dihomo-linolenate (20:3n3 or n6)	ENSG00000023608	SNAPC1	0.3063	0.06391	1.6449e-06	5	0.81812	0.3063	0.06391	1.6449e-06	5	0.81812	0	2.0084e-05	0.0288394
M35718	dihomo-linolenate (20:3n3 or n6)	ENSG00000134824	FADS2	0.24633	0.030061	2.5168e-16	12	0.56762	0.24633	0.030061	2.5168e-16	12	0.56762	0	2.4915e-13	2.00053e-11
M35718	dihomo-linolenate (20:3n3 or n6)	ENSG00000134825	TMEM258	0.36801	0.061999	2.9257e-09	6	0.26772	0.36801	0.061999	2.9257e-09	6	0.26772	0	1.4094e-13	9.7918e-05
M35718	dihomo-linolenate (20:3n3 or n6)	ENSG00000149485	FADS1	0.38381	0.038574	2.5248e-23	10	0.95398	0.38381	0.038574	2.5248e-23	10	0.95398	0	9.2707e-21	4.37867e-18
M35718	dihomo-linolenate (20:3n3 or n6)	ENSG00000176788	BASP1	-0.27131	0.057852	2.7369e-06	8	0.83753	-0.27131	0.057852	2.7369e-06	8	0.83753	0	8.8924e-05	0.0405465
M32504	docosapentaenoate (n3 DPA; 22:5n3)	ENSG00000134824	FADS2	-0.2043	0.033274	8.2478e-10	12	0.30381	-0.2043	0.033274	8.2478e-10	12	0.30381	0	7.2402e-13	3.21107e-05		35892532;35421603;33504005;33310680;32584610;32534376;31669375;31638497;31487670;30927246;28838557;26694605;26065859;25550171;24240437;24040040;23818766;23221573;22495065;22216341;21829377;20573490
M32504	docosapentaenoate (n3 DPA; 22:5n3)	ENSG00000134825	TMEM258	-0.4231	0.052514	7.8244e-16	6	0.92341	-0.4231	0.052514	7.8244e-16	6	0.92341	0	5.7382e-14	5.52834e-11
M32504	docosapentaenoate (n3 DPA; 22:5n3)	ENSG00000188895	MSL1	0.45443	0.095843	2.1228e-06	4	0.50317	0.45443	0.095843	2.1228e-06	4	0.50317	0	0.0017406	0.0355232
M32388	dodecanedioate	ENSG00000250155	CTD-2353F22.1	-0.18148	0.037868	1.6478e-06	9	0.25151	-0.18148	0.037868	1.6478e-06	9	0.25151	0	3.4236e-05	0.0288394
M18467	eicosapentaenoate (EPA; 20:5n3)	ENSG00000134824	FADS2	-0.2742	0.033206	1.4886e-16	12	0.32305	-0.2742	0.033206	1.4886e-16	12	0.32305	0	7.5468e-22	1.23469e-11		35871074;35580802;35421603;35268031;34176006;34062203;34052410;33982073;33967831;33946805;33530084;33526157;33504005;33494132;33310680;32968090;32725293;32707702;32634552;32622152;32584610;32423522;32375154;32222967;32023831;32015446;31839790;31669375;31658496;31568926;31564377;31532795;31487670;31276903;31006877;30928647;30927246;30923750;30854986;30774049;30511301;30453168;30368227;30290221;302…
M18467	eicosapentaenoate (EPA; 20:5n3)	ENSG00000149485	FADS1	-0.19453	0.039177	6.8528e-07	9	0.52645	-0.19453	0.039177	6.8528e-07	9	0.52645	0	5.99e-07	0.0146888	10917903;10685788;11026622;9610840;9917342	36090567;36046053;35871074;35631303;35268031;34052410;33982073;33530084;33526157;33504005;33310680;32622152;32584610;32423522;32375154;31690987;31568926;31564377;31340443;30927246;30854986;30511301;30459098;29746616;29722844;29549917;29080057;29074585;28765914;28732058;28598979;28272299;28186827;27527582;27273350;27253325;27004414;26943160;26869086;26791554;26694605;26584805;26501394;26092623;260…
M18467	eicosapentaenoate (EPA; 20:5n3)	ENSG00000134825	TMEM258	-0.48814	0.054234	2.2451e-19	6	0.40914	-0.48814	0.054234	2.2451e-19	6	0.40914	0	2.3917e-20	2.67685e-14
M33973	epiandrosterone sulfate	ENSG00000146833	TRIM4	0.1216	0.047925	0.011168	9	0.00023866	0.19935	0.031926	4.2643e-10	6	0.12625	3	1.3234e-16	1.69478e-05
M33973	epiandrosterone sulfate	ENSG00000166925	TSC22D4	0.73647	0.30301	0.015077	4	0.047157	0.92262	0.18822	9.4892e-07	3	0.2793	1	2.1158e-13	0.0189698
M02730	gamma-glutamylglutamine	ENSG00000176422	SPRYD4	-0.25186	0.037604	2.1161e-11	9	0.15094	-0.25186	0.037604	2.1161e-11	9	0.15094	0	1.8219e-18	8.97081e-07
M33422	gamma-glutamylphenylalanine	ENSG00000109381	ELF2	-0.3968	0.077274	2.8217e-07	4	0.70656	-0.3968	0.077274	2.8217e-07	4	0.70656	0	7.9662e-07	0.0070828
M02734	gamma-glutamyltyrosine	ENSG00000112679	DUSP22	-1.0157	0.21492	2.2887e-06	3	0.96549	-1.0157	0.21492	2.2887e-06	3	0.96549	0	0.00012849	0.0373174
M00053	glutamine	ENSG00000176422	SPRYD4	-0.25392	0.029617	1.0045e-17	9	0.73992	-0.25392	0.029617	1.0045e-17	9	0.73992	0	1.2788e-17	9.12512e-13
M35439	glutaroyl carnitine	ENSG00000105607	GCDH	-0.44414	0.072927	1.1281e-09	9	0.031788	-0.46743	0.069054	1.2959e-11	8	0.07884	1	7.5388e-15	5.74925e-07		35367405;34344405;34306040;34258142;34207159;34181873;33064266;32567100;31181292;29292490;28545977;28125888;27397597;26593172;24795062;23884036;23225040;22520952;18926513;18775269;17203377;17188916;16573641;15318278;14598231
M35439	glutaroyl carnitine	ENSG00000103064	SLC7A6	-0.21501	0.081086	0.0080112	5	0.003269	-0.24354	0.046307	1.447e-07	4	0.22824	1	4.6957e-11	0.00383393
M35439	glutaroyl carnitine	ENSG00000104889	RNASEH2A	0.42095	0.3712	0.25678	4	0.034076	0.79327	0.16917	2.7418e-06	3	0.31461	1	7.0625e-06	0.0405465
M35439	glutaroyl carnitine	ENSG00000157184	CPT2	0.72037	0.26812	0.0072163	4	0.0004776	0.8382	0.078481	1.2587e-26	3	0.59001	1	1.5454e-27	3.00151e-21
M35439	glutaroyl carnitine	ENSG00000167261	DPEP2	0.28996	0.15713	0.064991	5	0.0063957	0.48554	0.069249	2.3578e-12	3	0.58878	2	6.779e-12	1.12449e-07
M35439	glutaroyl carnitine	ENSG00000214401	KANSL1-AS1	-0.062035	0.013208	2.6413e-06	6	0.95097	-0.062035	0.013208	2.6413e-06	6	0.95097	0	0.00050408	0.0405465
M01644	heptanoate (7:0)	ENSG00000071205	ARHGAP10	-0.53944	0.10839	6.456e-07	3	0.95325	-0.53944	0.10839	6.456e-07	3	0.95325	0	2.4162e-06	0.0141564
M01644	heptanoate (7:0)	ENSG00000261098	RP11-819C21.1	0.19399	0.037627	2.5265e-07	3	0.42506	0.19399	0.037627	2.5265e-07	3	0.42506	0	2.5051e-07	0.00651321
M32328	hexanoylcarnitine	ENSG00000197208	SLC22A4	0.28158	0.046844	1.8428e-09	7	0.63473	0.28158	0.046844	1.8428e-09	7	0.63473	0	2.9558e-05	6.51017e-05
M35433	hydroxyisovaleroyl carnitine	ENSG00000078070	MCCC1	-0.56431	0.071441	2.8115e-15	3	0.98248	-0.56431	0.071441	2.8115e-15	3	0.98248	0	2.809e-14	1.84947e-10		31901042;22264772;16835865
M03127	hypoxanthine	ENSG00000257715	RP11-256L6.2	0.13394	0.027201	8.4802e-07	4	0.62932	0.13394	0.027201	8.4802e-07	4	0.62932	0	8.3567e-07	0.0175843
M01123	inosine	ENSG00000135318	NT5E	-0.35609	0.079532	7.5607e-06	9	0.013193	-0.30927	0.048519	1.8387e-10	8	0.86939	1	1.472e-09	7.62537e-06	1*	35946783;35716373;31401370;29132308
M34407	isovalerylcarnitine	ENSG00000197208	SLC22A4	0.57384	0.054431	5.5017e-26	7	0.337	0.57384	0.054431	5.5017e-26	7	0.337	0	7.3826e-27	1.16617e-20		17391561
M34407	isovalerylcarnitine	ENSG00000197375	SLC22A5	0.28881	0.069658	3.3819e-05	10	0.00064681	0.16074	0.033102	1.1989e-06	8	0.41704	2	0.0014118	0.0224228		17391561
M34407	isovalerylcarnitine	ENSG00000128944	KNSTRN	0.17562	0.028668	9.017e-10	11	0.2013	0.17562	0.028668	9.017e-10	11	0.2013	0	1.4196e-10	3.37287e-05
M34407	isovalerylcarnitine	ENSG00000140323	DISP2	-0.45703	0.095827	1.8487e-06	3	0.68672	-0.45703	0.095827	1.8487e-06	3	0.68672	0	1.9351e-06	0.0317725
M01645	laurate (12:0)	ENSG00000228409	CCT6P1	-0.14781	0.031741	3.2115e-06	3	0.40113	-0.14781	0.031741	3.2115e-06	3	0.40113	0	0.0039132	0.0467675
M34534	laurylcarnitine	ENSG00000171503	ETFDH	-0.34464	0.068232	4.3952e-07	7	0.24002	-0.34464	0.068232	4.3952e-07	7	0.24002	0	1.0655e-09	0.0104808
M01303	malate	ENSG00000169710	FASN	-0.30506	0.04997	1.0281e-09	3	0.76735	-0.30506	0.04997	1.0281e-09	3	0.76735	0	6.8876e-09	3.77172e-05		32060554;28852047;22023808
M01303	malate	ENSG00000176155	CCDC57	0.31879	0.053558	2.6447e-09	3	0.56147	0.31879	0.053558	2.6447e-09	3	0.56147	0	5.4825e-09	9.00941e-05
M00584	mannose	ENSG00000138074	SLC5A6	-0.28867	0.1158	0.012673	7	2.7428e-05	-0.31374	0.058125	6.7502e-08	5	0.23986	2	7.9675e-11	0.00204401
M00584	mannose	ENSG00000138085	ATRAID	0.36011	0.05061	1.1161e-12	4	0.60396	0.36011	0.05061	1.1161e-12	4	0.60396	0	2.0922e-11	5.60309e-08
M00584	mannose	ENSG00000157992	KRTCAP3	0.43346	0.059775	4.1201e-13	3	0.18976	0.43346	0.059775	4.1201e-13	3	0.18976	0	1.0778e-24	2.12429e-08
M27710	N-acetylglycine	ENSG00000231793	DOC2GP	0.10735	0.021323	4.7885e-07	8	0.91453	0.10735	0.021323	4.7885e-07	8	0.91453	0	5.0779e-06	0.0111402
M15630	N-acetylornithine	ENSG00000135631	RAB11FIP5	-0.25341	0.1557	0.10363	4	0.00013682	-0.29587	0.063033	2.6813e-06	3	0.29423	1	2.9706e-06	0.0405465
M15630	N-acetylornithine	ENSG00000204872	AC092653.5	-0.50233	0.07091	1.4e-12	3	0.073284	-0.50233	0.07091	1.4e-12	3	0.073284	0	1.5932e-37	6.84812e-08
M01356	nonadecanoate (19:0)	ENSG00000076321	KLHL20	0.46692	0.097852	1.8272e-06	3	0.8316	0.46692	0.097852	1.8272e-06	3	0.8316	0	3.3398e-05	0.0316885
M01356	nonadecanoate (19:0)	ENSG00000117593	DARS2	-0.57695	0.11996	1.5121e-06	4	0.4825	-0.57695	0.11996	1.5121e-06	4	0.4825	0	3.3398e-05	0.0272134
M36754	octadecanedioate	ENSG00000267453	AC004791.2	0.12775	0.024033	1.0646e-07	6	0.87786	0.12775	0.024033	1.0646e-07	6	0.87786	0	6.9303e-07	0.00298666
M33936	octanoylcarnitine	ENSG00000171503	ETFDH	-0.43354	0.13069	0.00090921	6	0.0095941	-0.56366	0.070514	1.3103e-15	5	0.15454	1	2.8453e-30	8.92731e-11
M37506	palmitoyl sphingomyelin	ENSG00000170209	ANKK1	0.25926	0.054904	2.3347e-06	9	0.90351	0.25926	0.054904	2.3347e-06	9	0.90351	0	2.3171e-06	0.0374981
M01508	pantothenate	ENSG00000138074	SLC5A6	0.28974	0.04765	1.1979e-09	7	0.75363	0.28974	0.04765	1.1979e-09	7	0.75363	0	6.5832e-10	4.31174e-05		31754459;35217562;35013551;31392107;29669219;28520815;27904971;25809983;23104561;22420308;20980265
M12035	pelargonate (9:0)	ENSG00000261098	RP11-819C21.1	0.18491	0.037624	8.9004e-07	3	0.45592	0.18491	0.037624	8.9004e-07	3	0.45592	0	6.0938e-06	0.018063
M01361	pentadecanoate (15:0)	ENSG00000116679	IVNS1ABP	-0.46204	0.098007	2.4252e-06	5	0.53956	-0.46204	0.098007	2.4252e-06	5	0.53956	0	0.0033371	0.0382358
M15958	phenylacetate	ENSG00000196247	ZNF107	0.88638	0.18311	1.2939e-06	5	0.39587	0.88638	0.18311	1.2939e-06	5	0.39587	0	0.0067622	0.0237342
M22130	phenyllactate (PLA)	ENSG00000125166	GOT2	0.36799	0.077475	2.036e-06	4	0.57514	0.36799	0.077475	2.036e-06	4	0.57514	0	0.00010286	0.0346791
M22130	phenyllactate (PLA)	ENSG00000186470	BTN3A2	-0.19086	0.035878	1.039e-07	8	0.53579	-0.19086	0.035878	1.039e-07	8	0.53579	0	9.1768e-07	0.00295834
M35127	pro-hydroxy-pro	ENSG00000135077	HAVCR2	-0.39296	0.078506	5.5707e-07	7	0.80721	-0.39296	0.078506	5.5707e-07	7	0.80721	0	6.4517e-05	0.0125026
M32452	propionylcarnitine	ENSG00000197208	SLC22A4	0.37494	0.062872	2.4688e-09	7	0.15341	0.37494	0.062872	2.4688e-09	7	0.15341	0	2.6815e-10	8.5631e-05
M32315	serine	ENSG00000146731	CCT6A	-0.45697	0.067844	1.6319e-11	3	0.99351	-0.45697	0.067844	1.6319e-11	3	0.99351	0	4.4237e-11	7.07536e-07
M33969	stearidonate (18:4n3)	ENSG00000134824	FADS2	-0.24113	0.032636	1.4865e-13	12	0.32485	-0.24113	0.032636	1.4865e-13	12	0.32485	0	1.3562e-15	8.59328e-09	1*	35456508;32891890;31807666;30764880;26842427;24050582;22216341
M33969	stearidonate (18:4n3)	ENSG00000134825	TMEM258	-0.40553	0.052667	1.3629e-14	6	0.53584	-0.40553	0.052667	1.3629e-14	6	0.53584	0	4.6238e-13	8.38707e-10
M34409	stearoylcarnitine	ENSG00000137818	RPLP1	1.0868	0.20547	1.2293e-07	4	0.70746	1.0868	0.20547	1.2293e-07	4	0.70746	0	0.0010467	0.00335018
M37058	succinylcarnitine	ENSG00000095321	CRAT	0.33156	0.068359	1.2327e-06	8	0.28191	0.33156	0.068359	1.2327e-06	8	0.28191	0	1.9289e-06	0.0228312		30266950
M37058	succinylcarnitine	ENSG00000138613	APH1B	-0.67225	0.1382	1.1494e-06	8	0.086286	-0.67225	0.1382	1.1494e-06	8	0.086286	0	9.4429e-19	0.021844
M32319	trans-4-hydroxyproline	ENSG00000119900	OGFRL1	-0.32484	0.062156	1.7309e-07	10	0.43596	-0.32484	0.062156	1.7309e-07	10	0.43596	0	0.0008909	0.00452332
M00054	tryptophan	ENSG00000071894	CPSF1	0.1263	0.024986	4.3099e-07	9	0.72107	0.1263	0.024986	4.3099e-07	9	0.72107	0	0.00010237	0.0104075
M37097	tryptophan betaine	ENSG00000233006	AC034220.3	-0.14192	0.026339	7.1188e-08	4	0.62349	-0.14192	0.026339	7.1188e-08	4	0.62349	0	0.00017574	0.00212195
M01604	urate	ENSG00000109667	SLC2A9	0.58139	0.25173	0.020911	7	1.5198e-07	0.78216	0.1127	3.9119e-12	5	0.050594	2	3.5181e-39	1.82017e-07		36077407;36006548;35975251;35702613;35633389;35470676;35340212;35281005;35264217;35246462;35023146;34986901;34887389;34873157;34829836;34732286;34690083;34603806;34572357;34545327;34412930;34408667;34306027;34290818;33832965;33810064;33798500;33663556;33087043;32901114;32850823;32778763;32759716;32620198;32561569;32560040;32384764;32375679;32258131;32183743;32166738;32164793;31841133;31784582;317…

## Sheet: SF1c
Phenotype	Description
ALP	Alkaline phosphatase
ALT	Alanine aminotransferase
AST	Aspartate aminotransferase
ApoA	Apolipoprotein A
BMI	Body mass index
CRP	C-reactive protein
Ca	Calcium
Cr	Creatinine
FVC	Forced vital capacity
GGT	Gamma-glutamyl transferase
HbA1c	Hemoglobin A1c
IGF1	Insulin-like growth factor 1
LPA	Lipoprotein(a)
SHBG	Sex hormone binding globulin
Albumin	Albumin
Bilirubin	Bilirubin
cystatinC	Cystatin C
diastolic_BP	Diastolic blood pressure
Glucose	Glucose
Heart_rate	Heart rate
Height	Height
Phosphate	Phosphate
Systolic_BP	Systolic blood pressure
Testosterone	Testosterone
Total_protein	Total protein
Urate	Urate
Urea	Urea
VitaminD	Vitamin D

## Sheet: SF1d
Phenotype	Shin_ID	Metabolite	alpha_ORIGINAL	SE_ORIGINAL	P_ORIGINAL	N_ORIGINAL	P_het_ORIGINAL	alpha	SE	P	N	P_het	N_outlier	FDR
cystatinC	M33228	1-arachidonoylglycerophosphocholine*	0.048515	0.016067	0.002531	4	0.0073591	0.055105	0.0065938	6.424e-17	3	0.56826	1	1.23341e-14
HbA1c	M33228	1-arachidonoylglycerophosphocholine*	0.060023	0.0085942	2.8652e-12	4	0.27092	0.060023	0.0085942	2.8652e-12	4	0.27092	0	3.85083e-10
ApoA	M33228	1-arachidonoylglycerophosphocholine*	0.090376	0.026104	0.00053576	4	0.00088425	0.10006	0.019854	4.6609e-07	3	0.02424	1	2.84739e-05
IGF1	M33228	1-arachidonoylglycerophosphocholine*	0.057321	0.011661	8.8489e-07	4	0.069777	0.057321	0.011661	8.8489e-07	4	0.069777	0	4.5742e-05
bilirubin	M33228	1-arachidonoylglycerophosphocholine*	0.051955	0.010859	1.7152e-06	4	0.12011	0.051955	0.010859	1.7152e-06	4	0.12011	0	7.73024e-05
CRP	M33228	1-arachidonoylglycerophosphocholine*	0.029637	0.0075509	8.6729e-05	4	0.33328	0.029637	0.0075509	8.6729e-05	4	0.33328	0	0.00228556
testosterone	M33228	1-arachidonoylglycerophosphocholine*	0.02721	0.015287	0.07509	4	0.016497	0.033329	0.0087888	0.00014932	3	0.27277	1	0.00371641
ALP	M33228	1-arachidonoylglycerophosphocholine*	-0.10912	0.035294	0.0019901	4	6.4438e-05	-0.11915	0.033189	0.00033076	3	0.001667	1	0.00626115
height	M33228	1-arachidonoylglycerophosphocholine*	0.050984	0.014458	0.00042124	4	0.077425	0.050984	0.014458	0.00042124	4	0.077425	0	0.00767263
glucose	M33228	1-arachidonoylglycerophosphocholine*	0.040595	0.018363	0.027058	4	0.0052893	0.046972	0.01474	0.0014396	3	0.051046	1	0.0218604
total_protein	M33228	1-arachidonoylglycerophosphocholine*	-0.076548	0.027867	0.0060158	4	0.00035841	-0.084516	0.027197	0.0018863	3	0.0030914	1	0.0266862
albumin	M33228	1-arachidonoylglycerophosphocholine*	-0.025337	0.0084859	0.002829	4	0.24824	-0.025337	0.0084859	0.002829	4	0.24824	0	0.0345652
Ca	M33228	1-arachidonoylglycerophosphocholine*	0.019796	0.0066919	0.0030936	4	0.78057	0.019796	0.0066919	0.0030936	4	0.78057	0	0.0372636
urate	M35186	1-arachidonoylglycerophosphoethanolamine*	-0.070277	0.01465	1.6092e-06	4	0.11486	-0.070277	0.01465	1.6092e-06	4	0.11486	0	7.72416e-05
total_protein	M35186	1-arachidonoylglycerophosphoethanolamine*	-0.10767	0.033567	0.0013381	4	0.012514	-0.12361	0.030016	3.8174e-05	3	0.055823	1	0.00106887
heart_rate	M35186	1-arachidonoylglycerophosphoethanolamine*	-0.09075	0.034557	0.0086377	4	0.036133	-0.11597	0.030628	0.00015275	3	0.055817	1	0.00373265
CRP	M35186	1-arachidonoylglycerophosphoethanolamine*	0.04387	0.018176	0.015794	4	0.036769	0.032269	0.0086988	0.00020762	3	0.79116	1	0.00461521
IGF1	M35186	1-arachidonoylglycerophosphoethanolamine*	0.031427	0.03971	0.4287	4	0.020095	-0.045642	0.012302	0.0002071	3	0.68787	1	0.00461521
diastolic_BP	M35186	1-arachidonoylglycerophosphoethanolamine*	-0.026892	0.0083662	0.0013071	4	0.50737	-0.026892	0.0083662	0.0013071	4	0.50737	0	0.0204272
ApoA	M35186	1-arachidonoylglycerophosphoethanolamine*	0.26162	0.2114	0.21587	4	7.4839e-05	0.12582	0.043782	0.0040543	3	0.023004	1	0.0450329
ALT	M35186	1-arachidonoylglycerophosphoethanolamine*	0.03618	0.023655	0.12614	4	0.01339	0.048944	0.01729	0.0046426	3	0.13765	1	0.0483694
albumin	M34214	1-arachidonoylglycerophosphoinositol*	-0.038234	0.012385	0.0020217	3	0.32512	-0.038234	0.012385	0.0020217	3	0.32512	0	0.0271716
vitamin_D	M35631	1-palmitoylglycerophosphoethanolamine	-0.20214	0.014298	2.221e-45	3	0.65813	-0.20214	0.014298	2.221e-45	3	0.65813	0	1.49251e-42
ApoA	M35631	1-palmitoylglycerophosphoethanolamine	0.85234	0.19061	7.7651e-06	3	0.063042	0.85234	0.19061	7.7651e-06	3	0.063042	0	0.000282062
BMI	M20675	1,5-anhydroglucitol(1,5-AG)	0.042792	0.0078772	5.5621e-08	4	0.6786	0.042792	0.0078772	5.5621e-08	4	0.6786	0	4.39733e-06
diastolic_BP	M20675	1,5-anhydroglucitol(1,5-AG)	0.036379	0.0081144	7.352e-06	4	0.48708	0.036379	0.0081144	7.352e-06	4	0.48708	0	0.000274475
heart_rate	M20675	1,5-anhydroglucitol(1,5-AG)	0.036181	0.0081034	8.0093e-06	4	0.60387	0.036181	0.0081034	8.0093e-06	4	0.60387	0	0.000283276
urate	M20675	1,5-anhydroglucitol(1,5-AG)	0.045885	0.012637	0.00028239	4	0.1706	0.045885	0.012637	0.00028239	4	0.1706	0	0.00550047
phosphate	M20675	1,5-anhydroglucitol(1,5-AG)	-0.032684	0.0093975	0.00050517	4	0.4151	-0.032684	0.0093975	0.00050517	4	0.4151	0	0.00870447
systolic_BP	M20675	1,5-anhydroglucitol(1,5-AG)	0.036974	0.012095	0.0022351	4	0.19613	0.036974	0.012095	0.0022351	4	0.19613	0	0.0297423
ALT	M20675	1,5-anhydroglucitol(1,5-AG)	0.023166	0.0080565	0.0040354	4	0.676	0.023166	0.0080565	0.0040354	4	0.676	0	0.0450329
albumin	M20675	1,5-anhydroglucitol(1,5-AG)	-0.023968	0.0084173	0.0044076	4	0.7861	-0.023968	0.0084173	0.0044076	4	0.7861	0	0.0473905
cystatinC	M22030	2-hydroxyisobutyrate	0.040849	0.011488	0.00037693	3	0.87875	0.040849	0.011488	0.00037693	3	0.87875	0	0.00703603
urea	M22030	2-hydroxyisobutyrate	0.038544	0.011492	0.00079635	3	0.91994	0.038544	0.011492	0.00079635	3	0.91994	0	0.0132135
CRP	M22030	2-hydroxyisobutyrate	-0.035103	0.011501	0.0022709	3	0.71344	-0.035103	0.011501	0.0022709	3	0.71344	0	0.0299224
Cr	M32654	3-dehydrocarnitine*	-0.038277	0.068133	0.57425	6	7.8521e-08	-0.087694	0.011212	5.2333e-15	5	0.38638	1	8.79194e-13
bilirubin	M32654	3-dehydrocarnitine*	-0.050184	0.01371	0.00025177	6	0.14495	-0.050184	0.01371	0.00025177	6	0.14495	0	0.00505043
SHBG	M32654	3-dehydrocarnitine*	0.035132	0.015821	0.026384	6	0.047899	0.045309	0.012858	0.00042547	5	0.26074	1	0.00767263
ApoA	M32654	3-dehydrocarnitine*	-0.062937	0.037629	0.094418	6	0.00015974	-0.031411	0.01072	0.0033871	5	0.37394	1	0.0399321
ALT	M15676	3-methyl-2-oxovalerate	0.053857	0.012501	1.6455e-05	3	0.50694	0.053857	0.012501	1.6455e-05	3	0.50694	0	0.000502625
testosterone	M31591	androsteronesulfate	0.10153	0.0091071	7.3008e-29	3	0.30493	0.10153	0.0091071	7.3008e-29	3	0.30493	0	3.27076e-26
FVC	M31591	androsteronesulfate	-0.027536	0.0061009	6.3799e-06	3	0.95535	-0.027536	0.0061009	6.3799e-06	3	0.95535	0	0.000252194
CRP	M31591	androsteronesulfate	0.036818	0.010853	0.00069299	3	0.11193	0.036818	0.010853	0.00069299	3	0.11193	0	0.0116422
height	M31591	androsteronesulfate	-0.036202	0.011644	0.0018764	3	0.21879	-0.036202	0.011644	0.0018764	3	0.21879	0	0.0266862
height	M03141	betaine	-0.036897	0.033567	0.27169	6	0.0033791	-0.06909	0.011806	4.8586e-09	5	0.81206	1	4.66426e-07
Cr	M03141	betaine	-0.11061	0.057965	0.056355	6	0.00029364	-0.056042	0.010708	1.661e-07	4	0.48057	2	1.24021e-05
ALP	M03141	betaine	-0.01369	0.029358	0.641	6	0.003901	-0.048939	0.010472	2.9637e-06	5	0.44811	1	0.000128491
GGT	M03141	betaine	-0.022724	0.024803	0.35959	6	0.0040798	-0.059857	0.019862	0.0025815	4	0.10855	2	0.0324256
BMI	M03141	betaine	-0.029939	0.018755	0.11041	6	0.016532	-0.042621	0.014818	0.0040244	5	0.16241	1	0.0450329
GGT	M32412	butyrylcarnitine	-0.0080809	0.01455	0.57864	12	0	-0.028366	0.0057503	8.0963e-07	5	0.11528	7	4.35257e-05
total_protein	M32412	butyrylcarnitine	-0.02014	0.0054919	0.00024518	12	0.012002	-0.021519	0.0048777	1.026e-05	11	0.069498	1	0.000336328
CRP	M32412	butyrylcarnitine	-0.0040326	0.020469	0.84382	12	0	-0.023031	0.0053059	1.4209e-05	5	0.17666	7	0.000444114
AST	M32412	butyrylcarnitine	0.0094278	0.0084106	0.26231	12	6.5304e-08	0.015186	0.0046861	0.0011923	9	0.12628	3	0.0188524
phosphate	M32412	butyrylcarnitine	0.019276	0.0069758	0.005722	12	0.00010491	0.015236	0.0052553	0.0037412	9	0.059643	3	0.0437232
FVC	M15500	carnitine	-0.013394	0.010807	0.21521	25	2.1649e-14	-0.029245	0.0069632	2.6699e-05	16	0.060157	9	0.000780075
bilirubin	M00063	cholesterol	0.062003	0.014038	1.0017e-05	3	0.49698	0.062003	0.014038	1.0017e-05	3	0.49698	0	0.000336328
height	M00063	cholesterol	-0.071722	0.018167	7.8802e-05	3	0.63832	-0.071722	0.018167	7.8802e-05	3	0.63832	0	0.00216143
diastolic_BP	M00063	cholesterol	-0.045794	0.013712	0.00083844	3	0.51159	-0.045794	0.013712	0.00083844	3	0.51159	0	0.0137422
Ca	M38178	cis-4-decenoylcarnitine	0.023093	0.0076289	0.0024693	3	0.75006	0.023093	0.0076289	0.0024693	3	0.75006	0	0.031911
Ca	M01564	citrate	0.067568	0.010936	6.4673e-10	5	0.68711	0.067568	0.010936	6.4673e-10	5	0.68711	0	7.90186e-08
total_protein	M02132	citrulline	-0.010313	0.043711	0.81348	4	0.032448	-0.053302	0.015134	0.00042816	3	0.56688	1	0.00767263
ALP	M02132	citrulline	0.042241	0.014831	0.0043982	4	0.39923	0.042241	0.014831	0.0043982	4	0.39923	0	0.0473905
AST	M33477	erythronate*	-0.046438	0.012435	0.0001882	4	0.49452	-0.046438	0.012435	0.0001882	4	0.49452	0	0.00446208
bilirubin	M33477	erythronate*	-0.061946	0.021735	0.004371	4	0.18496	-0.061946	0.021735	0.004371	4	0.18496	0	0.0473905
urea	M02730	gamma-glutamylglutamine	-0.096619	0.062505	0.12216	4	0.008683	-0.17513	0.061946	0.0046969	3	0.048025	1	0.0485451
Cr	M02734	gamma-glutamyltyrosine	-0.023428	0.033907	0.4896	5	0.015336	-0.055565	0.01514	0.00024245	4	0.42725	1	0.00497647
glucose	M02734	gamma-glutamyltyrosine	-0.034342	0.011918	0.0039566	5	0.69685	-0.034342	0.011918	0.0039566	5	0.69685	0	0.0450329
Cr	M35439	glutaroylcarnitine	-0.0057376	0.041009	0.88873	10	6.7724e-15	0.059399	0.01276	3.2414e-06	6	0.083272	4	0.000136139
diastolic_BP	M35439	glutaroylcarnitine	0.025602	0.0055349	3.7361e-06	10	0.44668	0.025602	0.0055349	3.7361e-06	10	0.44668	0	0.000152161
BMI	M35439	glutaroylcarnitine	0.013033	0.013236	0.32479	10	1.1059e-05	0.027096	0.0074556	0.00027869	8	0.1739	2	0.00550047
total_protein	M35439	glutaroylcarnitine	0.03331	0.015264	0.029092	10	6.8259e-06	0.020308	0.0065616	0.0019684	9	0.33258	1	0.0267823
SHBG	M35678	hexadecanedioate	-0.141	0.031186	6.1445e-06	4	0.0098036	-0.15659	0.020785	4.9302e-14	3	0.15649	1	7.36243e-12
Cr	M35678	hexadecanedioate	-0.034889	0.0078964	9.9464e-06	4	0.43026	-0.034889	0.0078964	9.9464e-06	4	0.43026	0	0.000336328
urate	M35678	hexadecanedioate	-0.045999	0.01254	0.00024438	4	0.10117	-0.045999	0.01254	0.00024438	4	0.10117	0	0.00497647
testosterone	M35678	hexadecanedioate	-0.031915	0.0088565	0.00031382	4	0.3617	-0.031915	0.0088565	0.00031382	4	0.3617	0	0.00602534
vitamin_D	M35678	hexadecanedioate	-0.044444	0.013678	0.001157	4	0.1119	-0.044444	0.013678	0.001157	4	0.1119	0	0.018512
ALT	M35678	hexadecanedioate	0.016724	0.032675	0.60876	4	0.00032148	0.034124	0.01089	0.001728	3	0.29435	1	0.0252438
total_protein	M35678	hexadecanedioate	-0.03247	0.010385	0.0017688	4	0.30224	-0.03247	0.010385	0.0017688	4	0.30224	0	0.025562
bilirubin	M35678	hexadecanedioate	0.32203	0.14217	0.023506	4	0.00017835	0.38017	0.12254	0.0019195	3	0.0077625	1	0.0267823
cystatinC	M35678	hexadecanedioate	-0.047628	0.0165	0.0038951	4	0.07658	-0.047628	0.0165	0.0038951	4	0.07658	0	0.0447437
Ca	M32328	hexanoylcarnitine	0.019072	0.0059881	0.0014476	5	0.78067	0.019072	0.0059881	0.0014476	5	0.78067	0	0.0218604
IGF1	M33441	isobutyrylcarnitine	-0.078641	0.0152	2.2963e-07	4	0.14312	-0.078641	0.0152	2.2963e-07	4	0.14312	0	1.62433e-05
bilirubin	M33441	isobutyrylcarnitine	0.062834	0.012426	4.2676e-07	4	0.20586	0.062834	0.012426	4.2676e-07	4	0.20586	0	2.73126e-05
ALP	M33441	isobutyrylcarnitine	-0.032997	0.016863	0.05038	4	0.041429	-0.041671	0.0083746	6.4951e-07	3	0.64967	1	3.7954e-05
GGT	M33441	isobutyrylcarnitine	0.037894	0.0086435	1.1647e-05	4	0.47217	0.037894	0.0086435	1.1647e-05	4	0.47217	0	0.000372704
Cr	M33441	isobutyrylcarnitine	0.070859	0.033178	0.032703	4	0.0047048	0.090639	0.026032	0.00049802	3	0.026343	1	0.00869271
LPA	M33441	isobutyrylcarnitine	-0.13828	0.049531	0.0052415	4	0.0012775	-0.15555	0.048449	0.0013251	3	0.01721	1	0.0204705
Cr	M34407	isovalerylcarnitine	-0.042178	0.032861	0.1993	4	0.026877	-0.086672	0.0093324	1.5845e-20	3	0.70883	1	3.54928e-18
phosphate	M34407	isovalerylcarnitine	0.051432	0.02351	0.028691	4	0.027789	0.081268	0.013606	2.3308e-09	3	0.33609	1	2.6105e-07
urate	M34407	isovalerylcarnitine	-0.053313	0.020775	0.010283	4	0.037409	-0.079028	0.013737	8.7732e-09	3	0.29866	1	7.36949e-07
CRP	M34407	isovalerylcarnitine	-0.036698	0.017191	0.032782	4	0.017572	-0.028489	0.0076317	0.00018924	3	0.5869	1	0.00446208
IGF1	M34407	isovalerylcarnitine	0.04387	0.01177	0.00019353	4	0.1608	0.04387	0.01177	0.00019353	4	0.1608	0	0.00448456
glucose	M15140	kynurenine	-0.028721	0.0075085	0.00013072	6	0.52716	-0.028721	0.0075085	0.00013072	6	0.52716	0	0.00331486
BMI	M15140	kynurenine	-0.036906	0.012211	0.0025081	6	0.10163	-0.036906	0.012211	0.0025081	6	0.10163	0	0.0321037
diastolic_BP	M19934	myo-inositol	0.060803	0.012712	1.7255e-06	3	0.94468	0.060803	0.012712	1.7255e-06	3	0.94468	0	7.73024e-05
CRP	M19934	myo-inositol	0.068877	0.019758	0.00049014	3	0.32211	0.068877	0.019758	0.00049014	3	0.32211	0	0.00866774
HbA1c	M19934	myo-inositol	0.037371	0.012637	0.0031053	3	0.85294	0.037371	0.012637	0.0031053	3	0.85294	0	0.0372636
Cr	M15630	N-acetylornithine	0.060953	0.0040428	2.2931e-51	3	0.60218	0.060953	0.0040428	2.2931e-51	3	0.60218	0	3.08193e-48
cystatinC	M15630	N-acetylornithine	0.039368	0.0040418	2.0343e-22	3	0.89945	0.039368	0.0040418	2.0343e-22	3	0.89945	0	5.4682e-20
diastolic_BP	M15630	N-acetylornithine	-0.018316	0.0040661	6.6496e-06	3	0.4954	-0.018316	0.0040661	6.6496e-06	3	0.4954	0	0.000255345
GGT	M15630	N-acetylornithine	-0.0159	0.0040428	8.391e-05	3	0.87781	-0.0159	0.0040428	8.391e-05	3	0.87781	0	0.0022555
urea	M15630	N-acetylornithine	0.012511	0.0040431	0.0019728	3	0.82925	0.012511	0.0040431	0.0019728	3	0.82925	0	0.0267823
AST	M15630	N-acetylornithine	-0.012141	0.0040493	0.0027146	3	0.82063	-0.012141	0.0040493	0.0027146	3	0.82063	0	0.0337817
Cr	M01898	proline	0.037182	0.0063394	4.4844e-09	5	0.7567	0.037182	0.0063394	4.4844e-09	5	0.7567	0	4.63618e-07
SHBG	M01898	proline	-0.032874	0.0066553	7.8316e-07	5	0.99718	-0.032874	0.0066553	7.8316e-07	5	0.99718	0	4.35257e-05
ALP	M01898	proline	0.023496	0.0063377	0.00020947	5	0.49765	0.023496	0.0063377	0.00020947	5	0.49765	0	0.00461521
height	M01898	proline	0.024121	0.0084476	0.0042985	5	0.45591	0.024121	0.0084476	0.0042985	5	0.45591	0	0.047354
FVC	M32452	propionylcarnitine	-0.031485	0.019899	0.11359	4	0.046322	-0.046212	0.0095167	1.1988e-06	3	0.92505	1	5.96736e-05
height	M32672	pyroglutamine*	-0.05075	0.011858	1.8705e-05	4	0.47334	-0.05075	0.011858	1.8705e-05	4	0.47334	0	0.000558656
urea	M32672	pyroglutamine*	0.084125	0.048907	0.085416	4	0.010671	0.038932	0.012356	0.0016274	3	0.37128	1	0.0240399
CRP	M32315	serine	-0.049854	0.0086234	7.4128e-09	4	0.61459	-0.049854	0.0086234	7.4128e-09	4	0.61459	0	6.64187e-07
ApoA	M32315	serine	-0.024498	0.049944	0.62378	4	0.023215	0.031674	0.010765	0.0032582	3	0.99568	1	0.0387524
cystatinC	M32315	serine	-0.08841	0.031534	0.0050528	4	0.03894	-0.056428	0.019909	0.0045932	3	0.17011	1	0.0482286
Cr	M37058	succinylcarnitine	0.035362	0.010327	0.00061668	7	0.017828	0.040558	0.0096738	2.7574e-05	6	0.050402	1	0.000788499
ApoA	M37058	succinylcarnitine	-0.027838	0.012379	0.024526	7	0.0047669	-0.0338	0.0091691	0.00022758	6	0.12003	1	0.00485504
systolic_BP	M37058	succinylcarnitine	0.023454	0.0098172	0.016888	7	0.038752	0.028928	0.0085182	0.0006838	6	0.1287	1	0.0116333
urate	M37058	succinylcarnitine	0.024787	0.0081787	0.0024402	7	0.060312	0.024787	0.0081787	0.0024402	7	0.060312	0	0.0318411
BMI	M37058	succinylcarnitine	0.016695	0.0058854	0.0045599	7	0.33524	0.016695	0.0058854	0.0045599	7	0.33524	0	0.0482286
urea	M37058	succinylcarnitine	0.018226	0.0087304	0.036826	7	0.037625	0.021272	0.0075305	0.0047317	6	0.14778	1	0.0485451
SHBG	M35669	tetradecanedioate	-0.12554	0.029314	1.8477e-05	4	0.011117	-0.14454	0.013358	2.7514e-27	3	0.28453	1	9.2447e-25
urate	M35669	tetradecanedioate	-0.041465	0.008112	3.1962e-07	4	0.29271	-0.041465	0.008112	3.1962e-07	4	0.29271	0	2.14785e-05
Cr	M35669	tetradecanedioate	-0.03034	0.0082212	0.00022379	4	0.31464	-0.03034	0.0082212	0.00022379	4	0.31464	0	0.00485119
ALT	M35669	tetradecanedioate	0.017008	0.029028	0.55794	4	0.00011547	0.031274	0.0085236	0.00024336	3	0.33402	1	0.00497647
testosterone	M35669	tetradecanedioate	-0.028211	0.0086188	0.0010633	4	0.30769	-0.028211	0.0086188	0.0010633	4	0.30769	0	0.0172178
vitamin_D	M35669	tetradecanedioate	-0.039695	0.01282	0.0019595	4	0.10381	-0.039695	0.01282	0.0019595	4	0.10381	0	0.0267823
bilirubin	M35669	tetradecanedioate	0.29155	0.12578	0.020449	4	0.00010454	0.33717	0.11166	0.002532	3	0.010983	1	0.0321038
total_protein	M35669	tetradecanedioate	-0.028716	0.0096114	0.0028107	4	0.26669	-0.028716	0.0096114	0.0028107	4	0.26669	0	0.0345652
CRP	M35669	tetradecanedioate	0.018112	0.0063755	0.0044992	4	0.6609	0.018112	0.0063755	0.0044992	4	0.6609	0	0.0479915
ALT	M01299	tyrosine	-0.050113	0.012878	9.9709e-05	3	0.70783	-0.050113	0.012878	9.9709e-05	3	0.70783	0	0.00257709
height	M01299	tyrosine	0.064206	0.020377	0.0016277	3	0.42417	0.064206	0.020377	0.0016277	3	0.42417	0	0.0240399
glucose	M01299	tyrosine	-0.038957	0.013462	0.0038068	3	0.99377	-0.038957	0.013462	0.0038068	3	0.99377	0	0.0441064
GGT	M01299	tyrosine	-0.042185	0.014964	0.0048153	3	0.40128	-0.042185	0.014964	0.0048153	3	0.40128	0	0.0490285

## Sheet: SF1e
Phenotype	Gene_ID	Gene	alpha_ORIGINAL	SE_ORIGINAL	P_ORIGINAL	N_ORIGINAL	P_het_ORIGINAL	alpha	SE	P	N	P_het	N_outlier	FDR
albumin	ENSG00000002549	LAP3	0.0085071	0.0027232	0.0017846	43	0.22478	0.0085071	0.0027232	0.0017846	43	0.22478	0	0.0429247
albumin	ENSG00000002726	ABP1	-0.01544	0.0048787	0.001552	29	0.00051881	-0.017939	0.0042198	2.1273e-05	25	0.051045	4	0.00151742
albumin	ENSG00000004777	ARHGAP33	-0.017065	0.0070312	0.015224	20	0.020275	-0.020537	0.0064941	0.0015647	19	0.098094	1	0.0392512
albumin	ENSG00000006042	TMEM98	0.044711	0.012672	0.0004181	6	0.43312	0.044711	0.012672	0.0004181	6	0.43312	0	0.0152676
albumin	ENSG00000006607	FARP2	-0.0035593	0.012968	0.78372	16	0.00084584	-0.031098	0.010045	0.0019626	14	0.87102	2	0.0457158
albumin	ENSG00000007516	BAIAP3	0.019655	0.0057319	0.0006055	15	0.80671	0.019655	0.0057319	0.0006055	15	0.80671	0	0.0200425
albumin	ENSG00000011021	CLCN6	-0.027487	0.0060767	6.0866e-06	10	0.4771	-0.027487	0.0060767	6.0866e-06	10	0.4771	0	0.000539301
albumin	ENSG00000011275	RNF216	0.029119	0.0093084	0.0017586	11	0.72744	0.029119	0.0093084	0.0017586	11	0.72744	0	0.042534
albumin	ENSG00000013810	TACC3	0.013708	0.0062332	0.027869	19	0.0015319	0.020452	0.0049755	3.9462e-05	18	0.12102	1	0.00247567
albumin	ENSG00000019169	MARCO	0.0082526	0.00382	0.030742	37	0.0058098	0.012586	0.003595	0.00046357	35	0.084179	2	0.0164704
albumin	ENSG00000022567	SLC45A4	-0.013981	0.0040187	0.00050306	25	0.37352	-0.013981	0.0040187	0.00050306	25	0.37352	0	0.0175038
albumin	ENSG00000023516	AKAP11	0.03851	0.012524	0.0021054	7	0.52703	0.03851	0.012524	0.0021054	7	0.52703	0	0.0478965
albumin	ENSG00000025156	HSF2	-0.019721	0.0069379	0.0044765	25	0.0045844	-0.021421	0.0052899	5.1355e-05	24	0.33485	1	0.00305775
albumin	ENSG00000030066	NUP160	-0.12199	0.037705	0.0012147	4	0.030743	-0.1427	0.020913	8.8812e-12	3	0.44151	1	3.78806e-09
albumin	ENSG00000031698	SARS	-0.054984	0.015601	0.00042444	4	0.92247	-0.054984	0.015601	0.00042444	4	0.92247	0	0.0154355
albumin	ENSG00000037280	FLT4	-0.034606	0.010818	0.0013788	4	0.53157	-0.034606	0.010818	0.0013788	4	0.53157	0	0.0359393
albumin	ENSG00000049541	RFC2	0.048495	0.014355	0.00072942	5	0.88137	0.048495	0.014355	0.00072942	5	0.88137	0	0.0228737
albumin	ENSG00000055070	SZRD1	-0.056659	0.015825	0.00034309	7	0.84725	-0.056659	0.015825	0.00034309	7	0.84725	0	0.0131843
albumin	ENSG00000062282	DGAT2	-0.08592	0.015144	1.3993e-08	3	0.61034	-0.08592	0.015144	1.3993e-08	3	0.61034	0	2.90365e-06
albumin	ENSG00000064989	CALCRL	-0.062113	0.010933	1.3368e-08	7	0.83658	-0.062113	0.010933	1.3368e-08	7	0.83658	0	2.7918e-06
albumin	ENSG00000065060	UHRF1BP1	-0.01194	0.0032469	0.00023565	46	8.2176e-05	-0.01028	0.0027092	0.00014798	44	0.055664	2	0.00698405
albumin	ENSG00000065135	GNAI3	0.014399	0.0059207	0.015015	23	0.00013892	0.016675	0.0046772	0.00036365	21	0.072676	2	0.0137733
albumin	ENSG00000065600	TMEM206	-0.026284	0.0072061	0.00026479	13	0.82184	-0.026284	0.0072061	0.00026479	13	0.82184	0	0.010884
albumin	ENSG00000066230	SLC9A3	-0.012692	0.0025743	8.2115e-07	16	0.62144	-0.012692	0.0025743	8.2115e-07	16	0.62144	0	9.98399e-05
albumin	ENSG00000066468	FGFR2	0.025718	0.0065763	9.2013e-05	19	0.072509	0.025718	0.0065763	9.2013e-05	19	0.072509	0	0.00482994
albumin	ENSG00000069275	NUCKS1	-0.028749	0.011798	0.014821	11	0.005939	-0.032707	0.009546	0.00061197	10	0.099879	1	0.020217
albumin	ENSG00000070087	PFN2	0.019308	0.0047376	4.591e-05	30	0.17073	0.019308	0.0047376	4.591e-05	30	0.17073	0	0.00279915
albumin	ENSG00000072778	ACADVL	0.054948	0.01213	5.903e-06	10	0.0034198	0.050028	0.010419	1.5744e-06	8	0.060309	2	0.000173517
albumin	ENSG00000072952	MRVI1	0.017676	0.0050712	0.00049117	31	0.00067869	0.015668	0.004179	0.00017738	29	0.098746	2	0.00803241
albumin	ENSG00000074201	CLNS1A	-0.026885	0.0073532	0.00025596	9	0.83464	-0.026885	0.0073532	0.00025596	9	0.83464	0	0.0106182
albumin	ENSG00000074755	ZZEF1	-0.081711	0.017479	2.9417e-06	3	0.5344	-0.081711	0.017479	2.9417e-06	3	0.5344	0	0.000291942
albumin	ENSG00000076003	MCM6	0.016966	0.0047375	0.00034195	26	0.96638	0.016966	0.0047375	0.00034195	26	0.96638	0	0.0131457
albumin	ENSG00000077458	FAM76B	0.021668	0.0048895	9.3583e-06	21	0.28667	0.021668	0.0048895	9.3583e-06	21	0.28667	0	0.000768254
albumin	ENSG00000078140	UBE2K	0.039488	0.012897	0.0022006	7	0.43868	0.039488	0.012897	0.0022006	7	0.43868	0	0.0492545
albumin	ENSG00000078487	ZCWPW1	0.040281	0.013014	0.0019663	10	0.011152	0.058915	0.013182	7.8523e-06	9	0.073483	1	0.000665373
albumin	ENSG00000078804	TP53INP2	0.0518	0.04017	0.19722	4	0.0059592	0.070142	0.021219	0.00094736	3	0.24679	1	0.0275864
albumin	ENSG00000082397	EPB41L3	-0.023132	0.0062833	0.00023179	14	0.68256	-0.023132	0.0062833	0.00023179	14	0.68256	0	0.00983761
albumin	ENSG00000082996	RNF13	-0.025432	0.0080847	0.0016568	14	0.13439	-0.025432	0.0080847	0.0016568	14	0.13439	0	0.0408427
albumin	ENSG00000084444	KIAA1467	-0.061531	0.03081	0.045812	5	0.026872	-0.081516	0.022514	0.0002938	4	0.13477	1	0.0117444
albumin	ENSG00000087274	ADD1	-0.063144	0.019392	0.0011292	3	0.32207	-0.063144	0.019392	0.0011292	3	0.32207	0	0.0313134
albumin	ENSG00000087338	GMCL1	0.044387	0.014294	0.0019011	3	0.98343	0.044387	0.014294	0.0019011	3	0.98343	0	0.0447722
albumin	ENSG00000090621	PABPC4	0.1085	0.02214	9.5528e-07	4	0.061949	0.1085	0.02214	9.5528e-07	4	0.061949	0	0.000113874
albumin	ENSG00000092531	SNAP23	0.072158	0.015256	2.2459e-06	3	0.59644	0.072158	0.015256	2.2459e-06	3	0.59644	0	0.000234435
albumin	ENSG00000095139	ARCN1	0.062533	0.018278	0.00062338	11	0.011241	0.050503	0.016452	0.0021428	10	0.06184	1	0.0484193
albumin	ENSG00000099250	NRP1	0.018009	0.0058846	0.0022105	17	0.70662	0.018009	0.0058846	0.0022105	17	0.70662	0	0.0494178
albumin	ENSG00000099308	MAST3	-0.066619	0.016111	3.5489e-05	6	0.1013	-0.066619	0.016111	3.5489e-05	6	0.1013	0	0.00227386
albumin	ENSG00000099785	MARCH2	0.034417	0.010876	0.0015538	9	0.031323	0.03827	0.0072866	1.5042e-07	8	0.60278	1	2.34141e-05
albumin	ENSG00000099875	MKNK2	-0.028215	0.0077606	0.00027728	6	0.52978	-0.028215	0.0077606	0.00027728	6	0.52978	0	0.0112643
albumin	ENSG00000099995	SF3A1	-0.015331	0.004492	0.00064269	26	0.037708	-0.023075	0.0045048	3.018e-07	25	0.23751	1	4.26387e-05
albumin	ENSG00000100012	SEC14L3	-0.028874	0.013374	0.030855	10	0.0012925	-0.034861	0.010279	0.00069478	8	0.1122	2	0.0221054
albumin	ENSG00000100031	GGT1	-0.043295	0.010237	2.3457e-05	5	0.62354	-0.043295	0.010237	2.3457e-05	5	0.62354	0	0.0016384
albumin	ENSG00000100083	GGA1	0.090593	0.036981	0.014298	5	6.2143e-06	0.08986	0.024509	0.00024603	3	0.039634	2	0.010326
albumin	ENSG00000100100	PIK3IP1	0.021228	0.0063795	0.00087632	28	0.010893	0.020943	0.0057006	0.00023889	26	0.11599	2	0.010081
albumin	ENSG00000100201	DDX17	0.032784	0.0098997	0.00092753	4	0.24646	0.032784	0.0098997	0.00092753	4	0.24646	0	0.0271657
albumin	ENSG00000100242	SUN2	-0.031809	0.0079225	5.945e-05	19	0.034311	-0.029409	0.0067614	1.3643e-05	18	0.24345	1	0.00105007
albumin	ENSG00000100426	ZBED4	-0.047377	0.011128	2.0667e-05	5	0.67903	-0.047377	0.011128	2.0667e-05	5	0.67903	0	0.00147961
albumin	ENSG00000100558	PLEK2	-0.044825	0.013372	0.0008016	4	0.90795	-0.044825	0.013372	0.0008016	4	0.90795	0	0.0244446
albumin	ENSG00000101000	PROCR	-0.063467	0.018391	0.00055856	3	0.61728	-0.063467	0.018391	0.00055856	3	0.61728	0	0.0189064
albumin	ENSG00000101019	UQCC	-0.016815	0.0042858	8.7274e-05	25	0.64602	-0.016815	0.0042858	8.7274e-05	25	0.64602	0	0.004637
albumin	ENSG00000101104	PABPC1L	-0.030191	0.0089912	0.00078544	11	0.019562	-0.040122	0.0066666	1.762e-09	10	0.18157	1	4.56791e-07
albumin	ENSG00000101152	DNAJC5	-0.063376	0.040575	0.1183	5	0.045686	-0.12685	0.033639	0.00016266	4	0.33981	1	0.00751492
albumin	ENSG00000101336	HCK	0.046436	0.013272	0.00046743	7	0.23078	0.046436	0.013272	0.00046743	7	0.23078	0	0.016584
albumin	ENSG00000101400	SNTA1	0.049242	0.015408	0.0013938	4	0.71457	0.049242	0.015408	0.0013938	4	0.71457	0	0.0362011
albumin	ENSG00000101460	MAP1LC3A	0.014764	0.0060116	0.014053	22	0.0071634	0.018642	0.0053414	0.00048299	20	0.13581	2	0.0170039
albumin	ENSG00000103496	STX4	-0.026248	0.0071794	0.0002562	13	0.28875	-0.026248	0.0071794	0.0002562	13	0.28875	0	0.0106251
albumin	ENSG00000103642	LACTB	-0.03474	0.0095546	0.00027697	9	0.89335	-0.03474	0.0095546	0.00027697	9	0.89335	0	0.0112541
albumin	ENSG00000103653	CSK	-0.031734	0.0081379	9.6385e-05	19	0.039099	-0.034162	0.0072453	2.4164e-06	18	0.18753	1	0.000248591
albumin	ENSG00000104043	ATP8B4	0.021337	0.0046626	4.7382e-06	30	0.69008	0.021337	0.0046626	4.7382e-06	30	0.69008	0	0.000437673
albumin	ENSG00000104763	ASAH1	-0.01489	0.0046494	0.0013626	31	0.43124	-0.01489	0.0046494	0.0013626	31	0.43124	0	0.0356751
albumin	ENSG00000104870	FCGRT	0.19045	0.081697	0.019742	5	6.5508e-09	0.18871	0.027552	7.4283e-12	3	0.019925	2	3.2058e-09
albumin	ENSG00000104872	PIH1D1	0.034482	0.037949	0.36354	7	1.5124e-09	0.03714	0.011342	0.0010579	4	0.3413	3	0.0299067
albumin	ENSG00000105053	VRK3	-0.015886	0.0057892	0.006069	20	0.026443	-0.014339	0.0043274	0.00092153	19	0.96796	1	0.0270352
albumin	ENSG00000105287	PRKD2	0.022422	0.0059753	0.00017508	16	0.27123	0.022422	0.0059753	0.00017508	16	0.27123	0	0.00795167
albumin	ENSG00000105677	TMEM147	-0.096518	0.021147	5.0148e-06	6	0.026591	-0.10408	0.012872	6.1771e-16	5	0.44676	1	5.0982e-13
albumin	ENSG00000105726	ATP13A1	0.026759	0.0079521	0.00076554	17	0.0045351	0.028993	0.0057244	4.0884e-07	16	0.33632	1	5.51991e-05
albumin	ENSG00000105856	HBP1	0.051008	0.016344	0.0018026	3	0.84871	0.051008	0.016344	0.0018026	3	0.84871	0	0.0432012
albumin	ENSG00000105875	WDR91	-0.072603	0.018934	0.0001258	5	0.33844	-0.072603	0.018934	0.0001258	5	0.33844	0	0.00615661
albumin	ENSG00000106330	MOSPD3	0.038492	0.012283	0.0017256	7	0.13716	0.038492	0.012283	0.0017256	7	0.13716	0	0.0419896
albumin	ENSG00000107263	RAPGEF1	0.010735	0.0033372	0.001296	32	0.78904	0.010735	0.0033372	0.001296	32	0.78904	0	0.0344856
albumin	ENSG00000107371	EXOSC3	0.037675	0.011691	0.0012711	5	0.8417	0.037675	0.011691	0.0012711	5	0.8417	0	0.0340245
albumin	ENSG00000107798	LIPA	-0.0077881	0.0024038	0.0011955	49	0.93732	-0.0077881	0.0024038	0.0011955	49	0.93732	0	0.0326225
albumin	ENSG00000107829	FBXW4	-0.12612	0.034671	0.0002752	3	0.70298	-0.12612	0.034671	0.0002752	3	0.70298	0	0.0112016
albumin	ENSG00000108622	ICAM2	0.024978	0.018084	0.16722	8	0.0049532	0.032076	0.010085	0.0014699	7	0.72274	1	0.0375501
albumin	ENSG00000108654	DDX5	0.018151	0.0052369	0.00052825	12	0.17063	0.018151	0.0052369	0.00052825	12	0.17063	0	0.0181575
albumin	ENSG00000108771	DHX58	0.057054	0.010487	5.3159e-08	7	0.016782	0.060121	0.007092	2.3052e-17	6	0.29178	1	2.31014e-14
albumin	ENSG00000108786	HSD17B1	-0.037953	0.010876	0.00048379	4	0.77022	-0.037953	0.010876	0.00048379	4	0.77022	0	0.0170238
albumin	ENSG00000109084	TMEM97	-0.018663	0.0039139	1.8576e-06	32	0.17198	-0.018663	0.0039139	1.8576e-06	32	0.17198	0	0.000199755
albumin	ENSG00000109736	MFSD10	0.030462	0.018102	0.092416	12	0.0011707	0.049678	0.015134	0.0010289	10	0.056576	2	0.0292853
albumin	ENSG00000109919	MTCH2	-0.10642	0.055682	0.055978	4	0.0067439	-0.13331	0.032252	3.5752e-05	3	0.20215	1	0.00228465
albumin	ENSG00000110075	PPP6R3	-0.049819	0.029317	0.089257	5	0.015725	-0.062462	0.015283	4.3693e-05	4	0.82832	1	0.00268564
albumin	ENSG00000110756	HPS5	-0.035033	0.011701	0.0027532	8	0.010682	-0.032389	0.0093816	0.00055561	7	0.11977	1	0.0188255
albumin	ENSG00000111328	CDK2AP1	0.017237	0.0066477	0.0095157	20	0.001031	0.024994	0.0058564	1.9741e-05	18	0.050197	2	0.00142554
albumin	ENSG00000112031	MTRF1L	-0.012912	0.0035886	0.00032056	17	0.83512	-0.012912	0.0035886	0.00032056	17	0.83512	0	0.0125161
albumin	ENSG00000112182	BACH2	-0.053271	0.01243	1.8214e-05	7	0.5553	-0.053271	0.01243	1.8214e-05	7	0.5553	0	0.00133596
albumin	ENSG00000112425	EPM2A	-0.030699	0.0087128	0.0004259	9	0.51359	-0.030699	0.0087128	0.0004259	9	0.51359	0	0.015477
albumin	ENSG00000112787	FBRSL1	-0.020941	0.0063722	0.0010153	12	0.80602	-0.020941	0.0063722	0.0010153	12	0.80602	0	0.0290141
albumin	ENSG00000112977	DAP	0.021666	0.0057147	0.00014993	22	0.13974	0.021666	0.0057147	0.00014993	22	0.13974	0	0.00705764
albumin	ENSG00000113716	HMGXB3	-0.023782	0.005378	9.7722e-06	4	0.54127	-0.023782	0.005378	9.7722e-06	4	0.54127	0	0.000795305
albumin	ENSG00000114423	CBLB	0.034013	0.0075567	6.7619e-06	17	0.15203	0.034013	0.0075567	6.7619e-06	17	0.15203	0	0.000587284
albumin	ENSG00000114796	KLHL24	-0.022318	0.0055767	6.2821e-05	5	0.51357	-0.022318	0.0055767	6.2821e-05	5	0.51357	0	0.00357338
albumin	ENSG00000114902	SPCS1	0.035796	0.0293	0.22181	4	0.0068056	0.047681	0.012527	0.00014107	3	0.80005	1	0.00673079
albumin	ENSG00000115109	EPB41L5	-0.086744	0.016639	1.8535e-07	5	0.92002	-0.086744	0.016639	1.8535e-07	5	0.92002	0	2.80299e-05
albumin	ENSG00000115159	GPD2	0.018973	0.0051045	0.00020164	21	0.58024	0.018973	0.0051045	0.00020164	21	0.58024	0	0.00885247
albumin	ENSG00000115216	NRBP1	0.1422	0.02333	1.0926e-09	4	0.031255	0.15178	0.010194	3.8438e-50	3	0.60795	1	4.8828e-46
albumin	ENSG00000115234	SNX17	0.067346	0.063545	0.28922	5	2.6925e-07	0.14029	0.025375	3.2255e-08	3	0.028953	2	6.14338e-06
albumin	ENSG00000115446	UNC50	0.027479	0.0083004	0.00093124	6	0.99024	0.027479	0.0083004	0.00093124	6	0.99024	0	0.0272435
albumin	ENSG00000115687	PASK	0.013021	0.0031851	4.3468e-05	18	0.48703	0.013021	0.0031851	4.3468e-05	18	0.48703	0	0.00267426
albumin	ENSG00000116497	S100PBP	-0.021282	0.0058994	0.00030917	14	0.69783	-0.021282	0.0058994	0.00030917	14	0.69783	0	0.0121969
albumin	ENSG00000116661	FBXO2	-0.013896	0.0045455	0.002235	14	0.22535	-0.013896	0.0045455	0.002235	14	0.22535	0	0.0498176
albumin	ENSG00000116678	LEPR	-0.0096342	0.0065693	0.1425	22	0.008292	-0.021737	0.0062493	0.00050478	21	0.11253	1	0.0175552
albumin	ENSG00000116857	TMEM9	0.01723	0.0033785	3.3998e-07	36	0.28669	0.01723	0.0033785	3.3998e-07	36	0.28669	0	4.70545e-05
albumin	ENSG00000116883	AL591845.1	0.018018	0.0050668	0.0003764	5	0.66091	0.018018	0.0050668	0.0003764	5	0.66091	0	0.0141411
albumin	ENSG00000116903	EXOC8	-0.040279	0.0090019	7.6595e-06	8	0.45833	-0.040279	0.0090019	7.6595e-06	8	0.45833	0	0.00065113
albumin	ENSG00000117500	TMED5	-0.015662	0.004586	0.00063769	23	0.50158	-0.015662	0.004586	0.00063769	23	0.50158	0	0.0207777
albumin	ENSG00000117676	RPS6KA1	-0.037639	0.011204	0.00078136	5	0.90211	-0.037639	0.011204	0.00078136	5	0.90211	0	0.0240128
albumin	ENSG00000118308	LRMP	0.044704	0.013232	0.00072907	5	0.89652	0.044704	0.013232	0.00072907	5	0.89652	0	0.0228652
albumin	ENSG00000118900	UBN1	0.081917	0.023879	0.00060257	3	0.52689	0.081917	0.023879	0.00060257	3	0.52689	0	0.0199788
albumin	ENSG00000119314	PTBP3	0.034046	0.010571	0.0012785	7	0.23699	0.034046	0.010571	0.0012785	7	0.23699	0	0.0341751
albumin	ENSG00000120833	SOCS2	0.033501	0.010905	0.0021264	12	0.1006	0.033501	0.010905	0.0021264	12	0.1006	0	0.0481717
albumin	ENSG00000121716	PILRB	-0.012605	0.0030616	3.8356e-05	43	0.0028027	-0.013803	0.0027663	6.049e-07	40	0.069417	3	7.67073e-05
albumin	ENSG00000122085	MTERFD2	-0.0047076	0.017041	0.78235	7	0.044313	-0.041618	0.012885	0.0012381	6	0.52834	1	0.0334043
albumin	ENSG00000122203	KIAA1191	-0.03015	0.0090567	0.00087142	7	0.45883	-0.03015	0.0090567	0.00087142	7	0.45883	0	0.0259746
albumin	ENSG00000122550	KLHL7	0.035568	0.010772	0.00096016	7	0.83348	0.035568	0.010772	0.00096016	7	0.83348	0	0.0278608
albumin	ENSG00000122986	HVCN1	-0.021892	0.073023	0.76434	4	1.8259e-07	-0.049587	0.013913	0.00036502	3	0.48183	1	0.0138135
albumin	ENSG00000124299	PEPD	-0.04709	0.033287	0.15717	5	0.0050983	-0.074561	0.016465	5.9451e-06	3	0.31806	2	0.000529835
albumin	ENSG00000124780	KCNK17	-0.016685	0.0034796	1.6263e-06	34	0.92987	-0.016685	0.0034796	1.6263e-06	34	0.92987	0	0.000178429
albumin	ENSG00000125388	GRK4	-0.0080111	0.013194	0.54372	18	2.8532e-08	-0.041595	0.012729	0.0010846	14	0.06163	4	0.0304348
albumin	ENSG00000125485	DDX31	0.026555	0.0076961	0.00055964	10	0.39716	0.026555	0.0076961	0.00055964	10	0.39716	0	0.0189292
albumin	ENSG00000125510	OPRL1	0.023328	0.0084769	0.0059236	20	2.9952e-06	0.020167	0.0059368	0.00068148	16	0.10113	4	0.0218135
albumin	ENSG00000126214	KLC1	-0.026165	0.0063741	4.0461e-05	20	0.6123	-0.026165	0.0063741	4.0461e-05	20	0.6123	0	0.00252694
albumin	ENSG00000126456	IRF3	-0.053511	0.031016	0.084476	12	2.2204e-16	-0.1133	0.0087364	1.8453e-38	8	0.55348	4	1.03681e-34
albumin	ENSG00000127124	HIVEP3	-0.027646	0.0078067	0.00039815	12	0.53345	-0.027646	0.0078067	0.00039815	12	0.53345	0	0.0147369
albumin	ENSG00000127580	WDR24	-0.031138	0.0094357	0.0009669	5	0.91588	-0.031138	0.0094357	0.0009669	5	0.91588	0	0.0279952
albumin	ENSG00000128159	TUBGCP6	-0.069104	0.017032	4.9618e-05	5	0.91306	-0.069104	0.017032	4.9618e-05	5	0.91306	0	0.00297677
albumin	ENSG00000128482	RNF112	-0.033508	0.0081951	4.3359e-05	8	0.83816	-0.033508	0.0081951	4.3359e-05	8	0.83816	0	0.00266967
albumin	ENSG00000128915	NARG2	-0.021864	0.0061618	0.00038766	21	0.0016043	-0.019683	0.0051728	0.00014173	20	0.064252	1	0.00675345
albumin	ENSG00000129933	MAU2	-0.010317	0.0049286	0.036318	21	0.00039876	-0.016764	0.0043712	0.00012554	18	0.12036	3	0.00614595
albumin	ENSG00000130921	C12orf65	0.10673	0.032245	0.00093258	3	0.30685	0.10673	0.032245	0.00093258	3	0.30685	0	0.0272745
albumin	ENSG00000130958	SLC35D2	0.043619	0.012889	0.00071385	6	0.49449	0.043619	0.012889	0.00071385	6	0.49449	0	0.022556
albumin	ENSG00000131149	GSE1	-0.050837	0.014958	0.00067711	6	0.59094	-0.050837	0.014958	0.00067711	6	0.59094	0	0.0217243
albumin	ENSG00000131323	TRAF3	-0.042421	0.022392	0.05816	8	0.00034555	-0.066023	0.018905	0.00047892	5	0.05883	3	0.0168952
albumin	ENSG00000131484	RP11-798G7.5	0.039404	0.010652	0.00021629	7	0.00061991	0.047123	0.0080357	4.511e-09	5	0.080786	2	1.05692e-06
albumin	ENSG00000132823	C20orf111	-0.021238	0.0053871	8.0679e-05	21	0.15713	-0.021238	0.0053871	8.0679e-05	21	0.15713	0	0.00435572
albumin	ENSG00000132881	RSG1	-0.071052	0.010564	1.7469e-11	10	0.16975	-0.071052	0.010564	1.7469e-11	10	0.16975	0	6.9821e-09
albumin	ENSG00000133460	SLC2A11	0.044046	0.010835	4.7984e-05	3	0.69993	0.044046	0.010835	4.7984e-05	3	0.69993	0	0.00289816
albumin	ENSG00000134184	GSTM1	0.0096149	0.0035993	0.0075559	44	0.00024416	0.011829	0.0032574	0.00028195	41	0.058585	3	0.0113986
albumin	ENSG00000134545	KLRC1	-0.018883	0.004847	9.7866e-05	15	0.53073	-0.018883	0.004847	9.7866e-05	15	0.53073	0	0.00506349
albumin	ENSG00000134571	MYBPC3	0.030795	0.0056109	4.0564e-08	36	2.4796e-08	0.038463	0.0047689	7.3027e-16	28	0.060326	8	5.91033e-13
albumin	ENSG00000134575	ACP2	-0.019197	0.0090766	0.034427	27	0	-0.019675	0.0048432	4.8591e-05	18	0.093374	9	0.00292658
albumin	ENSG00000136044	APPL2	0.026578	0.0057552	3.8751e-06	31	0.026833	0.029602	0.005486	6.8153e-08	30	0.097665	1	1.17964e-05
albumin	ENSG00000136147	PHF11	0.018439	0.0078778	0.019251	21	0.028823	0.020499	0.0065921	0.0018736	20	0.26786	1	0.0443283
albumin	ENSG00000136169	SETDB2	-0.042238	0.012317	0.00060546	7	0.21698	-0.042238	0.012317	0.00060546	7	0.21698	0	0.0200425
albumin	ENSG00000136270	TBRG4	0.015765	0.0048854	0.0012513	13	0.63669	0.015765	0.0048854	0.0012513	13	0.63669	0	0.0336579
albumin	ENSG00000136770	DNAJC1	0.1522	0.022284	8.4879e-12	4	0.75758	0.1522	0.022284	8.4879e-12	4	0.75758	0	3.64157e-09
albumin	ENSG00000137449	CPEB2	0.047974	0.010597	5.9802e-06	11	0.11992	0.047974	0.010597	5.9802e-06	11	0.11992	0	0.000531819
albumin	ENSG00000137501	SYTL2	-0.01255	0.0040364	0.0018753	30	0.53219	-0.01255	0.0040364	0.0018753	30	0.53219	0	0.0443541
albumin	ENSG00000137801	THBS1	0.013429	0.0091461	0.14203	20	7.2507e-07	0.027115	0.0063031	1.6941e-05	16	0.1771	4	0.00126042
albumin	ENSG00000137942	FNBP1L	0.053853	0.0098408	4.4381e-08	7	0.90239	0.053853	0.0098408	4.4381e-08	7	0.90239	0	8.08404e-06
albumin	ENSG00000137944	CCBL2	-0.017018	0.0050717	0.00079239	21	0.44862	-0.017018	0.0050717	0.00079239	21	0.44862	0	0.0242472
albumin	ENSG00000138074	SLC5A6	0.027152	0.018029	0.13206	24	0	0.046218	0.0079128	5.1903e-09	12	0.12693	12	1.195e-06
albumin	ENSG00000138085	ATRAID	-0.040868	0.020608	0.047352	19	0	-0.050147	0.0085581	4.6401e-09	10	0.1378	9	1.08196e-06
albumin	ENSG00000138115	CYP2C8	-0.079017	0.02006	8.1793e-05	6	0.51289	-0.079017	0.02006	8.1793e-05	6	0.51289	0	0.00440425
albumin	ENSG00000138246	DNAJC13	0.037024	0.031558	0.2407	8	9.3614e-05	0.077349	0.015084	2.9295e-07	6	0.10378	2	4.1529e-05
albumin	ENSG00000138463	DIRC2	-0.015098	0.0047381	0.0014396	22	0.089268	-0.015098	0.0047381	0.0014396	22	0.089268	0	0.0370058
albumin	ENSG00000139318	DUSP6	-0.056602	0.012229	3.6815e-06	8	0.34836	-0.056602	0.012229	3.6815e-06	8	0.34836	0	0.00035394
albumin	ENSG00000140474	ULK3	-0.014816	0.0066219	0.025262	25	0.0052511	-0.017458	0.0052443	0.00087212	24	0.24677	1	0.0259822
albumin	ENSG00000140497	SCAMP2	0.031865	0.008944	0.00036702	13	0.049599	0.028494	0.0070776	5.6749e-05	12	0.37034	1	0.0032976
albumin	ENSG00000140941	MAP1LC3B	0.01595	0.004576	0.00049114	11	0.61926	0.01595	0.004576	0.00049114	11	0.61926	0	0.017212
albumin	ENSG00000141030	COPS3	0.014597	0.0047142	0.0019593	30	0.026208	0.011958	0.0037326	0.0013572	29	0.52148	1	0.0355763
albumin	ENSG00000141232	TOB1	-0.031789	0.0067598	2.5669e-06	16	0.21774	-0.031789	0.0067598	2.5669e-06	16	0.21774	0	0.000261243
albumin	ENSG00000141505	ASGR1	0.070603	0.031957	0.027154	5	0.019723	0.085395	0.027493	0.0018958	4	0.085739	1	0.0446798
albumin	ENSG00000141664	ZCCHC2	-0.0058511	0.020703	0.77746	7	0.0025915	-0.032918	0.0093574	0.00043509	5	0.62419	2	0.0157249
albumin	ENSG00000141698	NT5C3B	0.0075919	0.0032613	0.019917	39	0.00047764	0.0098083	0.0027708	0.00040036	36	0.083678	3	0.014788
albumin	ENSG00000142453	CARM1	0.039913	0.010229	9.547e-05	6	0.42972	0.039913	0.010229	9.547e-05	6	0.42972	0	0.00496751
albumin	ENSG00000142546	NOSIP	-0.26827	0.029801	2.2121e-19	6	0.018934	-0.25832	0.025377	2.4552e-24	5	0.10761	1	5.16069e-21
albumin	ENSG00000142552	RCN3	0.086819	0.044659	0.051892	7	0	0.12119	0.013192	4.0534e-20	3	0.1216	4	5.3831e-17
albumin	ENSG00000142632	ARHGEF19	-0.010502	0.0075365	0.16347	26	5.8105e-06	-0.027553	0.0063136	1.2768e-05	24	0.07426	2	0.000993191
albumin	ENSG00000143126	CELSR2	0.043023	0.01211	0.00038137	5	0.33905	0.043023	0.01211	0.00038137	5	0.33905	0	0.0142871
albumin	ENSG00000143226	FCGR2A	-0.12711	0.034899	0.00027026	5	0.12911	-0.12711	0.034899	0.00027026	5	0.12911	0	0.0110579
albumin	ENSG00000143379	SETDB1	-0.1083	0.0213	3.6874e-07	3	0.37291	-0.1083	0.0213	3.6874e-07	3	0.37291	0	5.05797e-05
albumin	ENSG00000143384	MCL1	0.098326	0.032276	0.0023157	4	0.004706	0.087439	0.013244	4.0494e-11	3	0.62124	1	1.52071e-08
albumin	ENSG00000143409	FAM63A	0.077419	0.038873	0.046414	6	0.0098047	0.10487	0.026042	5.6536e-05	5	0.16796	1	0.00328908
albumin	ENSG00000143418	CERS2	0.041856	0.010902	0.00012333	7	0.46257	0.041856	0.010902	0.00012333	7	0.46257	0	0.00606365
albumin	ENSG00000143452	HORMAD1	0.042986	0.009078	2.189e-06	6	0.42354	0.042986	0.009078	2.189e-06	6	0.42354	0	0.000230223
albumin	ENSG00000143537	ADAM15	0.026953	0.0072514	0.00020167	28	1.8391e-10	0.018854	0.0050121	0.00016882	21	0.067489	7	0.00772471
albumin	ENSG00000143552	NUP210L	-0.02679	0.016011	0.094296	8	6.2476e-05	-0.031221	0.00882	0.0004005	7	0.22395	1	0.0147894
albumin	ENSG00000144118	RALB	-0.025925	0.0058153	8.2722e-06	26	0.19736	-0.025925	0.0058153	8.2722e-06	26	0.19736	0	0.000694508
albumin	ENSG00000144218	AFF3	-0.026895	0.0063415	2.224e-05	14	0.72267	-0.026895	0.0063415	2.224e-05	14	0.72267	0	0.00157469
albumin	ENSG00000144802	NFKBIZ	-0.037078	0.011602	0.0013941	11	0.084945	-0.037078	0.011602	0.0013941	11	0.084945	0	0.0362057
albumin	ENSG00000145390	USP53	-0.015279	0.0043902	0.000501	24	0.30137	-0.015279	0.0043902	0.000501	24	0.30137	0	0.0174404
albumin	ENSG00000145703	IQGAP2	0.022304	0.0051541	1.5085e-05	22	0.01185	0.023177	0.004353	1.0127e-07	21	0.16522	1	1.66599e-05
albumin	ENSG00000146386	ABRACL	0.016708	0.0056351	0.0030272	19	0.017248	0.01534	0.0045931	0.00083871	18	0.27229	1	0.0252599
albumin	ENSG00000146826	C7orf43	0.034766	0.011089	0.0017175	8	0.1833	0.034766	0.011089	0.0017175	8	0.1833	0	0.0418447
albumin	ENSG00000146834	MEPCE	0.05149	0.016367	0.0016552	4	0.075461	0.05149	0.016367	0.0016552	4	0.075461	0	0.0408101
albumin	ENSG00000147443	DOK2	0.02928	0.013322	0.027958	8	6.1578e-05	0.029582	0.00685	1.5703e-05	5	0.30609	3	0.00118399
albumin	ENSG00000147689	FAM83A	0.030373	0.0079554	0.0001346	10	0.26234	0.030373	0.0079554	0.0001346	10	0.26234	0	0.00649159
albumin	ENSG00000148110	HIATL1	0.012096	0.0026613	5.493e-06	36	0.093792	0.012096	0.0026613	5.493e-06	36	0.093792	0	0.000497105
albumin	ENSG00000148926	ADM	0.040225	0.0065232	6.9851e-10	19	0.16426	0.040225	0.0065232	6.9851e-10	19	0.16426	0	2.00672e-07
albumin	ENSG00000149177	PTPRJ	0.077072	0.02434	0.001543	5	0.004397	0.086098	0.016015	7.6131e-08	4	0.16434	1	1.30306e-05
albumin	ENSG00000150938	CRIM1	0.044348	0.011848	0.00018182	5	0.80696	0.044348	0.011848	0.00018182	5	0.80696	0	0.00817518
albumin	ENSG00000151116	UEVLD	-0.052939	0.024835	0.033034	5	0.048094	-0.065103	0.020437	0.0014449	4	0.17318	1	0.0371029
albumin	ENSG00000151240	DIP2C	-0.030985	0.0092818	0.0008431	4	0.86955	-0.030985	0.0092818	0.0008431	4	0.86955	0	0.0253424
albumin	ENSG00000151292	CSNK1G3	-0.13574	0.017948	3.9457e-14	4	0.68899	-0.13574	0.017948	3.9457e-14	4	0.68899	0	2.46328e-11
albumin	ENSG00000151748	SAV1	-0.06241	0.015936	8.9922e-05	7	0.1241	-0.06241	0.015936	8.9922e-05	7	0.1241	0	0.00473976
albumin	ENSG00000152061	RABGAP1L	0.037387	0.0086862	1.6764e-05	6	0.56786	0.037387	0.0086862	1.6764e-05	6	0.56786	0	0.00125043
albumin	ENSG00000152465	NMT2	0.014641	0.0032873	8.4344e-06	21	0.41744	0.014641	0.0032873	8.4344e-06	21	0.41744	0	0.000705289
albumin	ENSG00000152503	TRIM36	0.027641	0.0090249	0.0021933	10	0.72507	0.027641	0.0090249	0.0021933	10	0.72507	0	0.0491461
albumin	ENSG00000152926	ZNF117	0.011013	0.0087104	0.20612	10	0.030092	0.020259	0.0054676	0.00021115	9	0.72227	1	0.00915079
albumin	ENSG00000153094	BCL2L11	-0.066548	0.037929	0.079339	5	0.047017	-0.08849	0.020647	1.8206e-05	4	0.65179	1	0.00133596
albumin	ENSG00000153561	RMND5A	-0.045766	0.012429	0.00023118	6	0.60246	-0.045766	0.012429	0.00023118	6	0.60246	0	0.00982456
albumin	ENSG00000154122	ANKH	-0.021879	0.0071208	0.0021221	12	0.75708	-0.021879	0.0071208	0.0021221	12	0.75708	0	0.0481116
albumin	ENSG00000154874	CCDC144B	0.081076	0.018318	9.5984e-06	3	0.8287	0.081076	0.018318	9.5984e-06	3	0.8287	0	0.000784877
albumin	ENSG00000155636	RBM45	0.061737	0.015233	5.058e-05	4	0.42209	0.061737	0.015233	5.058e-05	4	0.42209	0	0.00302208
albumin	ENSG00000155755	TMEM237	0.038632	0.011359	0.00067147	8	0.42305	0.038632	0.011359	0.00067147	8	0.42305	0	0.0215895
albumin	ENSG00000156502	SUPV3L1	0.02102	0.0064365	0.0010918	11	0.42223	0.02102	0.0064365	0.0010918	11	0.42223	0	0.0305979
albumin	ENSG00000157017	GHRL	-0.032528	0.010414	0.0017873	4	0.98245	-0.032528	0.010414	0.0017873	4	0.98245	0	0.0429614
albumin	ENSG00000157107	FCHO2	0.045958	0.0075049	9.1391e-10	33	1.455e-08	0.05289	0.0056898	1.4649e-20	26	0.10207	7	2.03809e-17
albumin	ENSG00000157152	SYN2	0.03684	0.011159	0.0009627	12	0.043629	0.041939	0.010648	8.189e-05	11	0.1167	1	0.00440704
albumin	ENSG00000157992	KRTCAP3	-0.065273	0.018968	0.00057907	8	6.4933e-08	-0.088364	0.013691	1.0877e-10	3	0.035429	5	3.71688e-08
albumin	ENSG00000158710	TAGLN2	0.030234	0.0090611	0.00084786	4	0.78838	0.030234	0.0090611	0.00084786	4	0.78838	0	0.0254489
albumin	ENSG00000158792	SPATA2L	-0.022368	0.006944	0.0012765	19	0.083176	-0.022368	0.006944	0.0012765	19	0.083176	0	0.0341409
albumin	ENSG00000158985	CDC42SE2	0.019079	0.0059064	0.0012367	18	0.28428	0.019079	0.0059064	0.0012367	18	0.28428	0	0.0333778
albumin	ENSG00000159128	IFNGR2	0.015294	0.0055907	0.006227	24	0.048165	0.019037	0.0050214	0.00014994	23	0.25258	1	0.00705764
albumin	ENSG00000159314	ARHGAP27	0.015997	0.0048509	0.00097442	23	0.02977	0.014098	0.0045683	0.0020289	22	0.096677	1	0.0467421
albumin	ENSG00000159840	ZYX	0.014973	0.0041513	0.00031012	26	0.49094	0.014973	0.0041513	0.00031012	26	0.49094	0	0.0122179
albumin	ENSG00000160075	SSU72	0.028262	0.0060157	2.6273e-06	8	0.20005	0.028262	0.0060157	2.6273e-06	8	0.20005	0	0.000266256
albumin	ENSG00000160229	ZNF66P	-0.019321	0.0053169	0.00027932	9	0.8426	-0.019321	0.0053169	0.00027932	9	0.8426	0	0.011333
albumin	ENSG00000160285	LSS	-0.011909	0.0055699	0.032513	21	0.0041363	-0.014227	0.0046177	0.0020624	19	0.15289	2	0.0472457
albumin	ENSG00000160294	MCM3AP	0.025917	0.0064845	6.4214e-05	11	0.26579	0.025917	0.0064845	6.4214e-05	11	0.26579	0	0.00363452
albumin	ENSG00000160299	PCNT	-0.024701	0.004798	2.6315e-07	14	0.33205	-0.024701	0.004798	2.6315e-07	14	0.33205	0	3.7744e-05
albumin	ENSG00000160305	DIP2A	-0.0081158	0.0025895	0.001724	29	0.23344	-0.0081158	0.0025895	0.001724	29	0.23344	0	0.0419646
albumin	ENSG00000160307	S100B	-0.0098593	0.0039708	0.01303	21	0.00093089	-0.011091	0.0031208	0.00037973	19	0.1376	2	0.0142348
albumin	ENSG00000160336	ZNF761	0.032669	0.010259	0.0014507	7	0.55243	0.032669	0.010259	0.0014507	7	0.55243	0	0.0372093
albumin	ENSG00000160447	PKN3	-0.023297	0.0068651	0.0006901	13	0.27576	-0.023297	0.0068651	0.0006901	13	0.27576	0	0.0220116
albumin	ENSG00000160584	SIK3	0.068774	0.018913	0.00027662	3	0.81886	0.068774	0.018913	0.00027662	3	0.81886	0	0.0112453
albumin	ENSG00000160710	ADAR	-0.086388	0.025688	0.00077098	5	0.042972	-0.099953	0.023596	2.2747e-05	4	0.087384	1	0.00160018
albumin	ENSG00000160766	GBAP1	0.018575	0.0065262	0.0044249	28	6.3301e-10	0.014241	0.0038196	0.00019277	25	0.2054	3	0.00855302
albumin	ENSG00000160781	PAQR6	0.016915	0.0044968	0.0001688	39	2.49e-05	0.01212	0.003524	0.0005832	35	0.1528	4	0.0195048
albumin	ENSG00000160783	PMF1	-0.082184	0.01967	2.9395e-05	4	0.40359	-0.082184	0.01967	2.9395e-05	4	0.40359	0	0.00196556
albumin	ENSG00000160789	LMNA	0.038747	0.010856	0.00035804	5	0.16739	0.038747	0.010856	0.00035804	5	0.16739	0	0.0136174
albumin	ENSG00000161395	PGAP3	0.028022	0.011645	0.016107	15	2.5658e-05	0.026232	0.0080422	0.0011072	12	0.12183	3	0.030894
albumin	ENSG00000161955	TNFSF13	-0.045725	0.021375	0.032424	11	5.5921e-12	-0.063862	0.010145	3.0721e-10	8	0.053838	3	9.53853e-08
albumin	ENSG00000162378	ZYG11B	0.023386	0.0057455	4.6929e-05	25	0.10287	0.023386	0.0057455	4.6929e-05	25	0.10287	0	0.00284761
albumin	ENSG00000162415	ZSWIM5	0.026278	0.0078075	0.00076355	10	0.79792	0.026278	0.0078075	0.00076355	10	0.79792	0	0.0236276
albumin	ENSG00000162437	RAVER2	0.033117	0.0076612	1.5412e-05	10	0.68306	0.033117	0.0076612	1.5412e-05	10	0.68306	0	0.00116475
albumin	ENSG00000162702	ZNF281	0.052775	0.0072255	2.7929e-13	6	0.98279	0.052775	0.0072255	2.7929e-13	6	0.98279	0	1.50554e-10
albumin	ENSG00000162711	NLRP3	-0.024552	0.0090464	0.0066475	21	0.0043399	-0.040326	0.0084005	1.5833e-06	19	0.11916	2	0.000174366
albumin	ENSG00000162777	DENND2D	-0.025681	0.0080457	0.0014137	19	0.70803	-0.025681	0.0080457	0.0014137	19	0.70803	0	0.0365613
albumin	ENSG00000162877	PM20D1	-0.031837	0.0076503	3.161e-05	11	0.18601	-0.031837	0.0076503	3.161e-05	11	0.18601	0	0.002081
albumin	ENSG00000163083	INHBB	-0.042219	0.01354	0.00182	8	0.052206	-0.042219	0.01354	0.00182	8	0.052206	0	0.0434791
albumin	ENSG00000163141	BNIPL	-0.0065648	0.009931	0.50859	17	0.0017477	-0.032445	0.010019	0.0012024	15	0.15405	2	0.0327466
albumin	ENSG00000163421	PROK2	-0.016359	0.0049485	0.00094693	21	0.24135	-0.016359	0.0049485	0.00094693	21	0.24135	0	0.0275797
albumin	ENSG00000163472	TMEM79	0.023413	0.0062691	0.00018797	26	0.00053301	0.020262	0.0045033	6.8128e-06	24	0.30987	2	0.000590827
albumin	ENSG00000163735	CXCL5	-0.021646	0.0070323	0.0020828	18	0.063788	-0.021646	0.0070323	0.0020828	18	0.063788	0	0.0475601
albumin	ENSG00000163823	CCR1	-0.011226	0.0033517	0.00081019	31	0.48906	-0.011226	0.0033517	0.00081019	31	0.48906	0	0.0246371
albumin	ENSG00000163931	TKT	-0.017556	0.0048116	0.00026361	17	0.19795	-0.017556	0.0048116	0.00026361	17	0.19795	0	0.0108539
albumin	ENSG00000164088	PPM1M	-0.018538	0.0064911	0.0042922	26	0.049853	-0.020528	0.0056753	0.00029795	25	0.2802	1	0.01186
albumin	ENSG00000164251	F2RL1	0.012842	0.0040479	0.0015118	24	0.10003	0.012842	0.0040479	0.0015118	24	0.10003	0	0.0382857
albumin	ENSG00000164253	WDR41	-0.0090729	0.0027268	0.00087712	40	0.22634	-0.0090729	0.0027268	0.00087712	40	0.22634	0	0.0260813
albumin	ENSG00000164442	CITED2	-0.044056	0.011009	6.2828e-05	8	0.74637	-0.044056	0.011009	6.2828e-05	8	0.74637	0	0.00357338
albumin	ENSG00000164512	ANKRD55	-0.024173	0.0053979	7.5258e-06	31	0.013159	-0.025221	0.0048092	1.5697e-07	30	0.12476	1	2.42527e-05
albumin	ENSG00000166295	ANAPC16	-0.04924	0.012427	7.4193e-05	7	0.84083	-0.04924	0.012427	7.4193e-05	7	0.84083	0	0.00407337
albumin	ENSG00000166411	IDH3A	0.1558	0.037934	4.0066e-05	3	0.27744	0.1558	0.037934	4.0066e-05	3	0.27744	0	0.00250666
albumin	ENSG00000166763	STRCP1	0.039461	0.010845	0.0002739	11	4.1487e-10	0.040643	0.0041391	9.3138e-23	9	0.38066	2	1.63928e-19
albumin	ENSG00000166863	TAC3	-0.087645	0.02802	0.0017602	3	0.80077	-0.087645	0.02802	0.0017602	3	0.80077	0	0.0425586
albumin	ENSG00000166908	PIP4K2C	0.06526	0.017238	0.00015324	3	0.57489	0.06526	0.017238	0.00015324	3	0.57489	0	0.00717826
albumin	ENSG00000166925	TSC22D4	-0.064528	0.015293	2.4502e-05	6	0.48125	-0.064528	0.015293	2.4502e-05	6	0.48125	0	0.00169598
albumin	ENSG00000166949	SMAD3	0.050483	0.022102	0.022365	9	0.010076	0.065638	0.015552	2.4383e-05	8	0.22385	1	0.00168895
albumin	ENSG00000166997	CNPY4	0.031921	0.0082939	0.0001187	23	0.0047336	0.038532	0.0073796	1.7752e-07	21	0.088696	2	2.70276e-05
albumin	ENSG00000167074	TEF	-0.027365	0.0052262	1.6391e-07	24	0.37902	-0.027365	0.0052262	1.6391e-07	24	0.37902	0	2.51918e-05
albumin	ENSG00000167202	TBC1D2B	0.10906	0.021172	2.5868e-07	8	0.00053772	0.099038	0.014698	1.6033e-11	6	0.14194	2	6.42574e-09
albumin	ENSG00000167523	C16orf55	0.076561	0.020325	0.00016527	3	0.34891	0.076561	0.020325	0.00016527	3	0.34891	0	0.00761383
albumin	ENSG00000167608	TMC4	-0.016367	0.0051798	0.0015792	16	0.071193	-0.016367	0.0051798	0.0015792	16	0.071193	0	0.0395055
albumin	ENSG00000167711	SERPINF2	-0.03545	0.0081227	1.2749e-05	8	0.043491	-0.037887	0.0076675	7.762e-07	7	0.093072	1	9.52867e-05
albumin	ENSG00000167720	SRR	0.020982	0.0062722	0.00082203	23	0.0041829	0.019625	0.0054032	0.000281	20	0.1025	3	0.0113759
albumin	ENSG00000167842	MIS12	0.029165	0.0060435	1.3937e-06	21	0.43134	0.029165	0.0060435	1.3937e-06	21	0.43134	0	0.000156795
albumin	ENSG00000167992	VWCE	0.02362	0.043519	0.5873	4	0.042775	0.1051	0.024777	2.2162e-05	3	0.45063	1	0.00157048
albumin	ENSG00000168092	PAFAH1B2	0.026141	0.011559	0.023726	8	0.00075335	0.036871	0.0088977	3.4158e-05	6	0.062304	2	0.00221285
albumin	ENSG00000168237	GLYCTK	-0.026545	0.0059373	7.7897e-06	25	0.10828	-0.026545	0.0059373	7.7897e-06	25	0.10828	0	0.000660643
albumin	ENSG00000168246	UBTD2	-0.085944	0.027196	0.0015765	3	0.69178	-0.085944	0.027196	0.0015765	3	0.69178	0	0.0394692
albumin	ENSG00000168476	REEP4	-0.020184	0.0061432	0.0010178	11	0.84188	-0.020184	0.0061432	0.0010178	11	0.84188	0	0.029043
albumin	ENSG00000168517	HEXIM2	0.074646	0.024165	0.0020083	4	0.052132	0.074646	0.024165	0.0020083	4	0.052132	0	0.0464433
albumin	ENSG00000168546	GFRA2	0.019388	0.0066358	0.0034808	16	0.0035159	0.017969	0.0057173	0.0016722	15	0.062926	1	0.0410792
albumin	ENSG00000168569	TMEM223	-0.026733	0.0069343	0.00011565	9	0.48706	-0.026733	0.0069343	0.00011565	9	0.48706	0	0.00575532
albumin	ENSG00000168646	AXIN2	0.017877	0.0057882	0.0020111	20	0.50137	0.017877	0.0057882	0.0020111	20	0.50137	0	0.0464846
albumin	ENSG00000168803	ADAL	-0.064326	0.017058	0.00016255	8	0.00012787	-0.070961	0.012111	4.6532e-09	5	0.12252	3	1.08329e-06
albumin	ENSG00000168806	LCMT2	-0.069801	0.023783	0.0033357	11	1.3507e-09	-0.054494	0.0084079	9.0977e-11	8	0.21959	3	3.16815e-08
albumin	ENSG00000169062	UPF3A	0.027259	0.0068691	7.2367e-05	10	0.20605	0.027259	0.0068691	7.2367e-05	10	0.20605	0	0.00400066
albumin	ENSG00000169118	CSNK1G1	0.029863	0.0082922	0.00031651	7	0.85341	0.029863	0.0082922	0.00031651	7	0.85341	0	0.0124061
albumin	ENSG00000169180	XPO6	0.051057	0.015701	0.0011463	5	0.068964	0.051057	0.015701	0.0011463	5	0.068964	0	0.0316674
albumin	ENSG00000169313	P2RY12	0.040587	0.010735	0.00015644	7	0.49489	0.040587	0.010735	0.00015644	7	0.49489	0	0.00727936
albumin	ENSG00000169599	NFU1	-0.021846	0.013179	0.097392	6	0.027777	-0.026353	0.0079713	0.00094635	5	0.56399	1	0.0275668
albumin	ENSG00000170017	ALCAM	-0.014118	0.0048072	0.0033165	28	0.0089359	-0.01295	0.0038262	0.0007127	27	0.32443	1	0.0225332
albumin	ENSG00000170175	CHRNB1	0.073371	0.0079516	2.7773e-20	9	0.78738	0.073371	0.0079516	2.7773e-20	9	0.78738	0	3.79179e-17
albumin	ENSG00000170242	USP47	-0.044082	0.010875	5.0434e-05	4	0.65342	-0.044082	0.010875	5.0434e-05	4	0.65342	0	0.0030152
albumin	ENSG00000170291	ELP5	-0.051	0.019121	0.0076487	4	0.045294	-0.06104	0.014372	2.1655e-05	3	0.14279	1	0.00153903
albumin	ENSG00000170340	B3GNT2	0.029665	0.0090205	0.0010069	19	0.00081984	0.024222	0.0075078	0.0012544	16	0.056802	3	0.0337156
albumin	ENSG00000170509	HSD17B13	-0.014174	0.0066177	0.032211	28	0.0001972	-0.0177	0.0051546	0.000595	24	0.14639	4	0.0198019
albumin	ENSG00000170677	SOCS6	-0.058156	0.018576	0.0017436	3	0.83015	-0.058156	0.018576	0.0017436	3	0.83015	0	0.0423042
albumin	ENSG00000170889	RPS9	0.013509	0.0040658	0.00089168	7	0.17199	0.013509	0.0040658	0.00089168	7	0.17199	0	0.026374
albumin	ENSG00000170892	TSEN34	-0.026671	0.00653	4.42e-05	8	0.55659	-0.026671	0.00653	4.42e-05	8	0.55659	0	0.0027113
albumin	ENSG00000171916	LGALS9C	-0.011388	0.0036399	0.0017554	18	0.0095091	-0.012158	0.0030009	5.0904e-05	17	0.16309	1	0.00303771
albumin	ENSG00000172070	SRXN1	-0.0099198	0.002941	0.00074378	32	0.53786	-0.0099198	0.002941	0.00074378	32	0.53786	0	0.0231971
albumin	ENSG00000172260	NEGR1	-0.015465	0.004829	0.0013619	13	0.789	-0.015465	0.004829	0.0013619	13	0.789	0	0.0356675
albumin	ENSG00000172273	HINFP	0.024753	0.0097359	0.011008	12	0.013589	0.027851	0.008581	0.0011718	11	0.082942	1	0.0321736
albumin	ENSG00000172301	COPRS	0.034491	0.011038	0.0017799	4	0.53086	0.034491	0.011038	0.0017799	4	0.53086	0	0.0428646
albumin	ENSG00000172830	SSH3	-0.026293	0.0084656	0.0018975	11	0.30019	-0.026293	0.0084656	0.0018975	11	0.30019	0	0.0447078
albumin	ENSG00000172869	DMXL1	0.10792	0.030903	0.00047905	3	0.46404	0.10792	0.030903	0.00047905	3	0.46404	0	0.0168977
albumin	ENSG00000172932	ANKRD13D	0.042943	0.010701	5.993e-05	3	0.88897	0.042943	0.010701	5.993e-05	3	0.88897	0	0.00343671
albumin	ENSG00000173264	GPR137	0.039961	0.012582	0.0014931	4	0.7526	0.039961	0.012582	0.0014931	4	0.7526	0	0.0379719
albumin	ENSG00000173334	TRIB1	0.1477	0.031085	2.0187e-06	4	0.44003	0.1477	0.031085	2.0187e-06	4	0.44003	0	0.000214943
albumin	ENSG00000173692	PSMD1	-0.04638	0.012253	0.00015356	6	0.57014	-0.04638	0.012253	0.00015356	6	0.57014	0	0.0071877
albumin	ENSG00000173715	C11orf80	0.022101	0.010695	0.038787	12	0.037459	0.029183	0.0089621	0.0011291	11	0.22678	1	0.0313134
albumin	ENSG00000173930	SLCO4C1	0.021816	0.0055447	8.3355e-05	14	0.59433	0.021816	0.0055447	8.3355e-05	14	0.59433	0	0.00447187
albumin	ENSG00000173960	UBXN2A	0.025109	0.0056294	8.1853e-06	15	0.60396	0.025109	0.0056294	8.1853e-06	15	0.60396	0	0.000688399
albumin	ENSG00000173992	CCS	-0.011984	0.005108	0.018971	23	0.032618	-0.013717	0.0044811	0.0022047	22	0.20133	1	0.0493033
albumin	ENSG00000174004	LRRC33	0.016653	0.0048706	0.0006282	20	0.95325	0.016653	0.0048706	0.0006282	20	0.95325	0	0.0205764
albumin	ENSG00000174137	FAM53A	0.028875	0.0075554	0.00013252	9	0.24417	0.028875	0.0075554	0.00013252	9	0.24417	0	0.00641139
albumin	ENSG00000174606	ANGEL2	0.036722	0.0067115	4.4636e-08	16	0.72727	0.036722	0.0067115	4.4636e-08	16	0.72727	0	8.12182e-06
albumin	ENSG00000175164	ABO	0.013608	0.00352	0.00011072	15	0.14398	0.013608	0.00352	0.00011072	15	0.14398	0	0.00556208
albumin	ENSG00000175220	ARHGAP1	0.025974	0.042736	0.54335	7	0.00037418	0.085028	0.02717	0.0017509	5	0.15183	2	0.0424144
albumin	ENSG00000175787	ZNF169	-0.035266	0.010414	0.0007081	5	0.60483	-0.035266	0.010414	0.0007081	5	0.60483	0	0.0224291
albumin	ENSG00000175826	CTDNEP1	0.044075	0.013133	0.0007904	7	0.0073349	0.054054	0.0081816	3.9304e-11	5	0.33318	2	1.47983e-08
albumin	ENSG00000176422	SPRYD4	0.042759	0.0058163	1.9592e-13	22	0.1952	0.042759	0.0058163	1.9592e-13	22	0.1952	0	1.09449e-10
albumin	ENSG00000176658	MYO1D	0.032329	0.0078635	3.9347e-05	8	0.46336	0.032329	0.0078635	3.9347e-05	8	0.46336	0	0.00247173
albumin	ENSG00000177096	FAM109B	0.031973	0.0085812	0.00019456	9	0.41568	0.031973	0.0085812	0.00019456	9	0.41568	0	0.00861673
albumin	ENSG00000177112	MRVI1-AS1	0.021213	0.011352	0.061659	8	0.006063	0.026209	0.0085084	0.0020676	7	0.21105	1	0.0473203
albumin	ENSG00000177352	CCDC71	-0.11236	0.056521	0.046824	4	0.036187	-0.17993	0.0451	6.6172e-05	3	0.060714	1	0.00371886
albumin	ENSG00000178026	FAM211B	-0.037461	0.011047	0.00069641	5	0.4799	-0.037461	0.011047	0.00069641	5	0.4799	0	0.0221452
albumin	ENSG00000178295	2001-01-01	0.046965	0.014419	0.0011257	8	0.37623	0.046965	0.014419	0.0011257	8	0.37623	0	0.0312609
albumin	ENSG00000178685	PARP10	-0.056229	0.011254	5.8402e-07	5	0.32751	-0.056229	0.011254	5.8402e-07	5	0.32751	0	7.43824e-05
albumin	ENSG00000178719	GRINA	-0.03065	0.0044403	5.1057e-12	15	0.72123	-0.03065	0.0044403	5.1057e-12	15	0.72123	0	2.23313e-09
albumin	ENSG00000178966	RMI1	0.038589	0.016069	0.016332	10	0.039609	0.044443	0.012706	0.00046935	9	0.29013	1	0.0166279
albumin	ENSG00000179406	LINC00174	-0.017063	0.0045893	0.00020069	13	0.22763	-0.017063	0.0045893	0.00020069	13	0.22763	0	0.00882534
albumin	ENSG00000179562	GCC1	-0.051682	0.010337	5.7382e-07	6	0.81152	-0.051682	0.010337	5.7382e-07	6	0.81152	0	7.3339e-05
albumin	ENSG00000179743	RP11-169K16.9	0.036128	0.0091528	7.9072e-05	11	0.14694	0.036128	0.0091528	7.9072e-05	11	0.14694	0	0.00428776
albumin	ENSG00000179913	B3GNT3	-0.030489	0.0099202	0.0021159	3	0.47688	-0.030489	0.0099202	0.0021159	3	0.47688	0	0.0480456
albumin	ENSG00000180992	MRPL14	0.033589	0.0077563	1.4874e-05	8	0.42852	0.033589	0.0077563	1.4874e-05	8	0.42852	0	0.001132
albumin	ENSG00000181104	F2R	0.030954	0.011645	0.0078566	14	0.0002712	0.030915	0.0081854	0.00015879	11	0.18217	3	0.00736781
albumin	ENSG00000182010	RTKN2	-0.018862	0.0073148	0.0099201	19	0.0066991	-0.017378	0.0055638	0.0017881	18	0.28777	1	0.0429735
albumin	ENSG00000182544	MFSD5	0.032548	0.0081115	6.0064e-05	9	0.8755	0.032548	0.0081115	6.0064e-05	9	0.8755	0	0.00344366
albumin	ENSG00000182809	CRIP2	-0.020072	0.0061107	0.001021	15	0.11476	-0.020072	0.0061107	0.001021	15	0.11476	0	0.029103
albumin	ENSG00000183172	C22orf32	0.012522	0.0028698	1.2806e-05	34	0.43584	0.012522	0.0028698	1.2806e-05	34	0.43584	0	0.000995617
albumin	ENSG00000183426	NPIP	0.013109	0.0033429	8.8059e-05	23	0.055393	0.013109	0.0033429	8.8059e-05	23	0.055393	0	0.00466741
albumin	ENSG00000183793	PKD1P1	-0.010596	0.0039771	0.0077165	24	2.7994e-05	-0.010575	0.00309	0.00062082	22	0.071859	2	0.0204079
albumin	ENSG00000183955	SETD8	0.012894	0.004143	0.0018572	9	0.30028	0.012894	0.004143	0.0018572	9	0.30028	0	0.0440616
albumin	ENSG00000184164	CRELD2	-0.016009	0.006481	0.013506	16	0.0038625	-0.017055	0.0054938	0.0019066	15	0.068881	1	0.0448548
albumin	ENSG00000184361	SPATA32	0.063281	0.012716	6.4736e-07	4	0.25526	0.063281	0.012716	6.4736e-07	4	0.25526	0	8.13152e-05
albumin	ENSG00000185022	MAFF	-0.061572	0.01963	0.0017093	3	0.36617	-0.061572	0.01963	0.0017093	3	0.36617	0	0.0417159
albumin	ENSG00000185324	CDK10	0.015621	0.0066728	0.019229	21	0.00046231	0.02179	0.0050638	1.6843e-05	20	0.11271	1	0.00125472
albumin	ENSG00000186152	LILRP1	-0.014843	0.0036068	3.8689e-05	15	0.15802	-0.014843	0.0036068	3.8689e-05	15	0.15802	0	0.00243668
albumin	ENSG00000187474	FPR3	-0.02802	0.012776	0.028295	17	0.0004048	-0.034638	0.0093898	0.00022523	16	0.12302	1	0.00962209
albumin	ENSG00000187775	DNAH17	0.11253	0.029354	0.00012632	3	0.9526	0.11253	0.029354	0.00012632	3	0.9526	0	0.00617689
albumin	ENSG00000188315	C3orf62	-0.1116	0.043698	0.010653	6	0.0053235	-0.17968	0.032568	3.448e-08	3	0.11155	3	6.51197e-06
albumin	ENSG00000189266	PNRC2	0.029317	0.0093795	0.0017739	3	0.57815	0.029317	0.0093795	0.0017739	3	0.57815	0	0.0427518
albumin	ENSG00000196700	ZNF512B	0.036431	0.035104	0.29936	7	0.018846	0.10064	0.022905	1.1142e-05	6	0.49371	1	0.00088573
albumin	ENSG00000197147	LRRC8B	-0.0086719	0.0026291	0.00097218	46	0.53749	-0.0086719	0.0026291	0.00097218	46	0.53749	0	0.0281086
albumin	ENSG00000197157	SND1	0.075428	0.021788	0.00053624	5	0.055884	0.075428	0.021788	0.00053624	5	0.055884	0	0.0183673
albumin	ENSG00000197165	SULT1A2	-0.012708	0.0063287	0.044636	11	0.041824	-0.016117	0.0045083	0.00035024	10	0.56207	1	0.0134009
albumin	ENSG00000197249	SERPINA1	-0.032684	0.017838	0.06691	27	0	-0.053909	0.0063197	1.4599e-17	22	0.05472	5	1.49663e-14
albumin	ENSG00000197353	LYPD2	0.02271	0.0066779	0.00067189	18	0.24424	0.02271	0.0066779	0.00067189	18	0.24424	0	0.0216006
albumin	ENSG00000197879	MYO1C	-0.082944	0.020067	3.575e-05	3	0.70105	-0.082944	0.020067	3.575e-05	3	0.70105	0	0.00228465
albumin	ENSG00000198015	MRPL42	0.019426	0.0058001	0.00081009	16	0.77161	0.019426	0.0058001	0.00081009	16	0.77161	0	0.0246366
albumin	ENSG00000198089	SFI1	0.018651	0.0057887	0.0012732	19	0.21121	0.018651	0.0057887	0.0012732	19	0.21121	0	0.0340682
albumin	ENSG00000198355	PIM3	0.023527	0.007414	0.0015074	14	0.13156	0.023527	0.007414	0.0015074	14	0.13156	0	0.0382041
albumin	ENSG00000198369	SPRED2	0.049759	0.013618	0.00025839	3	0.51305	0.049759	0.013618	0.00025839	3	0.51305	0	0.0106901
albumin	ENSG00000198382	UVRAG	-0.061682	0.016077	0.00012471	8	0.31368	-0.061682	0.016077	0.00012471	8	0.31368	0	0.00611454
albumin	ENSG00000198646	NCOA6	-0.065396	0.014064	3.3212e-06	5	0.65725	-0.065396	0.014064	3.3212e-06	5	0.65725	0	0.000323775
albumin	ENSG00000198690	FAN1	0.010069	0.0032637	0.0020337	25	0.48959	0.010069	0.0032637	0.0020337	25	0.48959	0	0.0468144
albumin	ENSG00000198715	C1orf85	0.011099	0.0026331	2.4968e-05	49	0.01224	0.010153	0.0025243	5.7682e-05	48	0.050423	1	0.00333613
albumin	ENSG00000198793	MTOR	-0.055381	0.013018	2.0988e-05	4	0.27307	-0.055381	0.013018	2.0988e-05	4	0.27307	0	0.00150002
albumin	ENSG00000198832	RP3-412A9.11	0.031252	0.0068407	4.9112e-06	20	0.05439	0.031252	0.0068407	4.9112e-06	20	0.05439	0	0.000451939
albumin	ENSG00000198951	NAGA	0.0298	0.0088869	0.00079879	12	0.30492	0.0298	0.0088869	0.00079879	12	0.30492	0	0.0243945
albumin	ENSG00000198952	SMG5	0.015943	0.0042865	0.00019982	42	5.0202e-06	0.011719	0.0033279	0.00042901	39	0.085967	3	0.0155552
albumin	ENSG00000203705	TATDN3	0.028324	0.0082445	0.00059157	10	0.26437	0.028324	0.0082445	0.00059157	10	0.26437	0	0.0197096
albumin	ENSG00000204219	TCEA3	0.029329	0.0075843	0.00011014	8	0.2833	0.029329	0.0075843	0.00011014	8	0.2833	0	0.00554152
albumin	ENSG00000204377	C1orf134	-0.032468	0.0078693	3.6927e-05	6	0.042509	-0.036542	0.0046366	3.2397e-15	5	0.74598	1	2.37825e-12
albumin	ENSG00000204650	CRHR1-IT1	-0.025895	0.0030856	4.7713e-17	24	0.29427	-0.025895	0.0030856	4.7713e-17	24	0.29427	0	4.58563e-14
albumin	ENSG00000205531	NAP1L4	0.046971	0.012325	0.00013845	6	0.29028	0.046971	0.012325	0.00013845	6	0.29028	0	0.00663348
albumin	ENSG00000205702	CYP2D7P1	0.013618	0.0032809	3.3162e-05	10	0.58457	0.013618	0.0032809	3.3162e-05	10	0.58457	0	0.00216464
albumin	ENSG00000205771	CATSPER2P1	0.02792	0.0035096	1.7875e-15	3	0.24358	0.02792	0.0035096	1.7875e-15	3	0.24358	0	1.36359e-12
albumin	ENSG00000205810	KLRC3	-0.014574	0.0044603	0.001085	21	0.22059	-0.014574	0.0044603	0.001085	21	0.22059	0	0.0304431
albumin	ENSG00000205903	ZNF316	0.080955	0.018344	1.0185e-05	3	0.5759	0.080955	0.018344	1.0185e-05	3	0.5759	0	0.000822031
albumin	ENSG00000211513	MIR320E	0.028798	0.0070575	4.4943e-05	4	0.77486	0.028798	0.0070575	4.4943e-05	4	0.77486	0	0.00274937
albumin	ENSG00000214309	MBLAC1	0.041555	0.019949	0.037244	4	0.017725	0.034257	0.010083	0.00067986	3	0.66546	1	0.0217849
albumin	ENSG00000214401	KANSL1-AS1	-0.014857	0.0038122	9.7243e-05	20	0.0010312	-0.020325	0.0028237	6.1139e-13	19	0.063443	1	3.10661e-10
albumin	ENSG00000214425	LRRC37A4P	0.022418	0.0023628	2.3487e-21	12	0.4727	0.022418	0.0023628	2.3487e-21	12	0.4727	0	3.55554e-18
albumin	ENSG00000214530	STARD10	-0.020934	0.0052349	6.3649e-05	17	0.11996	-0.020934	0.0052349	6.3649e-05	17	0.11996	0	0.00360884
albumin	ENSG00000215251	FASTKD5	-0.05358	0.016624	0.0012686	4	0.22057	-0.05358	0.016624	0.0012686	4	0.22057	0	0.0339794
albumin	ENSG00000215271	HOMEZ	-0.032851	0.0096343	0.00065008	4	0.86536	-0.032851	0.0096343	0.00065008	4	0.86536	0	0.0210857
albumin	ENSG00000215440	NPEPL1	0.027516	0.010273	0.0073964	16	0.00047714	0.030489	0.008167	0.00018907	15	0.055458	1	0.00842171
albumin	ENSG00000217075	AC007401.2	0.025752	0.0064789	7.0439e-05	3	0.78598	0.025752	0.0064789	7.0439e-05	3	0.78598	0	0.00391407
albumin	ENSG00000217644	RP4-803A2.1	-0.018802	0.0058552	0.0013223	3	0.75871	-0.018802	0.0058552	0.0013223	3	0.75871	0	0.0349557
albumin	ENSG00000221962	TMEM14E	-0.11255	0.019199	4.5679e-09	6	0.67361	-0.11255	0.019199	4.5679e-09	6	0.67361	0	1.06683e-06
albumin	ENSG00000223510	CDRT15	0.01323	0.0039338	0.00077072	5	0.54387	0.01323	0.0039338	0.00077072	5	0.54387	0	0.0237809
albumin	ENSG00000224183	SDHDP6	-0.019666	0.0028223	3.2144e-12	20	0.82055	-0.019666	0.0028223	3.2144e-12	20	0.82055	0	1.45379e-09
albumin	ENSG00000224203	RP11-5K23.3	-0.02196	0.0033937	9.7357e-11	18	0.1942	-0.02196	0.0033937	9.7357e-11	18	0.1942	0	3.35434e-08
albumin	ENSG00000225051	HMGB3P22	0.07233	0.019022	0.00014327	3	0.59789	0.07233	0.019022	0.00014327	3	0.59789	0	0.00680637
albumin	ENSG00000225138	CTD-2228K2.7	-0.010859	0.0035	0.0019179	14	0.37938	-0.010859	0.0035	0.0019179	14	0.37938	0	0.0450251
albumin	ENSG00000225190	PLEKHM1	-0.061718	0.043251	0.15359	6	3.7991e-05	-0.1115	0.028883	0.00011323	4	0.12404	2	0.00565995
albumin	ENSG00000225434	RP11-63P12.6	0.03508	0.0064275	4.8188e-08	3	0.42869	0.03508	0.0064275	4.8188e-08	3	0.42869	0	8.7177e-06
albumin	ENSG00000227359	AC017074.2	0.023022	0.0062556	0.00023301	4	0.48702	0.023022	0.0062556	0.00023301	4	0.48702	0	0.00988077
albumin	ENSG00000228216	RP11-367F23.1	-0.024316	0.0066929	0.00028003	3	0.50985	-0.024316	0.0066929	0.00028003	3	0.50985	0	0.0113539
albumin	ENSG00000228839	RP3-400N23.6	0.032389	0.0076419	2.251e-05	6	0.7451	0.032389	0.0076419	2.251e-05	6	0.7451	0	0.00158867
albumin	ENSG00000230537	RP11-305L7.1	-0.013948	0.0038386	0.00027939	6	0.68337	-0.013948	0.0038386	0.00027939	6	0.68337	0	0.0113343
albumin	ENSG00000232956	SNHG15	-0.023345	0.0062916	0.00020677	10	0.92391	-0.023345	0.0062916	0.00020677	10	0.92391	0	0.00901537
albumin	ENSG00000233327	USP32P2	-0.010823	0.0024578	1.0654e-05	17	0.57212	-0.010823	0.0024578	1.0654e-05	17	0.57212	0	0.000853284
albumin	ENSG00000233614	DDX11L10	-0.012902	0.0030476	2.3016e-05	14	0.28198	-0.012902	0.0030476	2.3016e-05	14	0.28198	0	0.00161649
albumin	ENSG00000234329	RP11-767N6.2	-0.017664	0.0057687	0.0021985	4	0.68858	-0.017664	0.0057687	0.0021985	4	0.68858	0	0.0492309
albumin	ENSG00000235081	AC010492.2	-0.023403	0.0065608	0.00036099	7	0.40334	-0.023403	0.0065608	0.00036099	7	0.40334	0	0.0137014
albumin	ENSG00000236609	ZNF853	0.047074	0.015135	0.0018689	3	0.62048	0.047074	0.015135	0.0018689	3	0.62048	0	0.0442565
albumin	ENSG00000238083	LRRC37A2	-0.017619	0.0033329	1.2475e-07	21	0.065581	-0.017619	0.0033329	1.2475e-07	21	0.065581	0	2.00045e-05
albumin	ENSG00000239335	RP11-745O10.2	-0.0075363	0.0022495	0.00080771	21	0.52013	-0.0075363	0.0022495	0.00080771	21	0.52013	0	0.0245898
albumin	ENSG00000239688	Metazoa_SRP	-0.025448	0.0077454	0.0010179	3	0.32027	-0.025448	0.0077454	0.0010179	3	0.32027	0	0.029043
albumin	ENSG00000241399	CD302	-0.025136	0.0063705	7.9584e-05	17	0.077457	-0.025136	0.0063705	7.9584e-05	17	0.077457	0	0.00430833
albumin	ENSG00000242372	EIF6	0.015096	0.0057401	0.0085388	17	0.035307	0.013963	0.004325	0.0012442	16	0.52927	1	0.033519
albumin	ENSG00000243224	RP5-1157M23.2	-0.039832	0.012803	0.0018631	6	0.046507	-0.042746	0.010318	3.4285e-05	5	0.214	1	0.00221862
albumin	ENSG00000243284	VSIG8	0.059384	0.019026	0.0018011	3	0.50507	0.059384	0.019026	0.0018011	3	0.50507	0	0.0431723
albumin	ENSG00000243566	UPK3B	0.016329	0.0045354	0.00031795	19	0.66034	0.016329	0.0045354	0.00031795	19	0.66034	0	0.0124425
albumin	ENSG00000244879	GABPB1-AS1	0.011838	0.0037254	0.0014853	37	0.0088513	0.010584	0.0034632	0.0022409	35	0.061165	2	0.0498951
albumin	ENSG00000245937	CTC-228N24.3	0.031262	0.0073559	2.1386e-05	19	0.0051419	0.032915	0.0064889	3.9241e-07	18	0.056557	1	5.32776e-05
albumin	ENSG00000246548	RP11-7F17.5	-0.015058	0.0038008	7.4366e-05	8	0.81566	-0.015058	0.0038008	7.4366e-05	8	0.81566	0	0.00407722
albumin	ENSG00000247317	RP11-273G15.2	-0.039451	0.011837	0.00085971	3	0.65386	-0.039451	0.011837	0.00085971	3	0.65386	0	0.0257174
albumin	ENSG00000247626	MARS2	-0.031698	0.010278	0.0020418	5	0.66802	-0.031698	0.010278	0.0020418	5	0.66802	0	0.0469209
albumin	ENSG00000248098	BCKDHA	-0.033078	0.0099793	0.00091745	5	0.72054	-0.033078	0.0099793	0.00091745	5	0.72054	0	0.026948
albumin	ENSG00000248508	RP11-521C20.4	-0.033579	0.0070375	1.8289e-06	7	0.030461	-0.038766	0.0062313	4.9358e-10	6	0.10318	1	1.46257e-07
albumin	ENSG00000248810	RP11-362F19.1	-0.0077406	0.0025172	0.0021042	25	0.73732	-0.0077406	0.0025172	0.0021042	25	0.73732	0	0.0478909
albumin	ENSG00000249667	RP11-213G21.1	0.030331	0.0063346	1.6832e-06	4	0.87799	0.030331	0.0063346	1.6832e-06	4	0.87799	0	0.000183227
albumin	ENSG00000249700	SRD5A3-AS1	-0.028983	0.0055455	1.7283e-07	4	0.3979	-0.028983	0.0055455	1.7283e-07	4	0.3979	0	2.63961e-05
albumin	ENSG00000249849	RP11-1101H11.1	0.015789	0.0050123	0.0016325	11	0.27042	0.015789	0.0050123	0.0016325	11	0.27042	0	0.0404347
albumin	ENSG00000253540	FAM86HP	0.016075	0.005122	0.0016981	5	0.2609	0.016075	0.005122	0.0016981	5	0.2609	0	0.0415199
albumin	ENSG00000255197	RP11-750H9.5	-0.020434	0.016162	0.20611	7	0.00011076	-0.04676	0.010309	5.7383e-06	4	0.15062	3	0.000514756
albumin	ENSG00000255422	AP002954.4	-0.012923	0.0029966	1.614e-05	22	0.013936	-0.013788	0.0027368	4.7014e-07	21	0.080353	1	6.2098e-05
albumin	ENSG00000255443	RP1-68D18.4	-0.017762	0.0055996	0.0015141	3	0.28105	-0.017762	0.0055996	0.0015141	3	0.28105	0	0.0383307
albumin	ENSG00000255446	CTD-2531D15.4	-0.010114	0.0031343	0.0012512	11	0.43434	-0.010114	0.0031343	0.0012512	11	0.43434	0	0.0336579
albumin	ENSG00000256049	PADI6	0.013813	0.0036059	0.00012772	15	0.70391	0.013813	0.0036059	0.00012772	15	0.70391	0	0.00623075
albumin	ENSG00000256229	ZNF486	-0.012236	0.0039036	0.0017206	13	0.81842	-0.012236	0.0039036	0.0017206	13	0.81842	0	0.0418958
albumin	ENSG00000256269	HMBS	0.047124	0.011598	4.8438e-05	19	8.1048e-08	0.052098	0.0076321	8.7254e-12	14	0.12129	5	3.73798e-09
albumin	ENSG00000256433	RP1-102E24.8	-0.01381	0.0039977	0.00055158	6	0.76975	-0.01381	0.0039977	0.00055158	6	0.76975	0	0.0187303
albumin	ENSG00000256525	POLG2	-0.04735	0.010523	6.802e-06	6	0.36407	-0.04735	0.010523	6.802e-06	6	0.36407	0	0.000590065
albumin	ENSG00000256872	NOL12	-0.024041	0.02216	0.27797	7	2.4034e-07	-0.032361	0.010288	0.0016577	6	0.13186	1	0.0408545
albumin	ENSG00000258602	RP11-7F17.7	-0.029004	0.0085894	0.0007335	3	0.40102	-0.029004	0.0085894	0.0007335	3	0.40102	0	0.0229647
albumin	ENSG00000258890	CEP95	-0.020823	0.0049517	2.6079e-05	5	0.54173	-0.020823	0.0049517	2.6079e-05	5	0.54173	0	0.00178234
albumin	ENSG00000259081	RP11-488C13.6	0.018174	0.0053671	0.00070869	3	0.48638	0.018174	0.0053671	0.00070869	3	0.48638	0	0.022442
albumin	ENSG00000259421	CTA-150C2.20	-0.022405	0.0065472	0.00062152	6	0.31233	-0.022405	0.0065472	0.00062152	6	0.31233	0	0.0204217
albumin	ENSG00000259715	CTD-3110H11.1	0.0082413	0.0027099	0.0023562	26	0.036358	0.0088755	0.0024713	0.00032885	25	0.16165	1	0.0127512
albumin	ENSG00000259792	RP11-114H24.6	0.052254	0.0061699	2.4695e-17	3	0.64596	0.052254	0.0061699	2.4695e-17	3	0.64596	0	2.4625e-14
albumin	ENSG00000260054	RP11-611L7.1	0.0277	0.029416	0.34635	4	0.007136	0.041996	0.012043	0.00048839	3	0.84764	1	0.0171328
albumin	ENSG00000260075	NSFP1	0.014486	0.0048888	0.0030446	14	0.0014556	0.015575	0.003912	6.8487e-05	12	0.086476	2	0.00382744
albumin	ENSG00000261349	RP3-465N24.5	-0.014535	0.0038525	0.00016136	15	0.0056537	-0.018854	0.003283	9.3065e-09	13	0.13715	2	2.01264e-06
albumin	ENSG00000261575	RP11-259G18.1	-0.027644	0.0062723	1.0465e-05	4	0.038749	-0.028565	0.0063064	5.9107e-06	3	0.063761	1	0.000527468
albumin	ENSG00000261643	RP11-529E10.6	-0.026779	0.0079932	0.00080749	5	0.095767	-0.026779	0.0079932	0.00080749	5	0.095767	0	0.0245857
albumin	ENSG00000262089	RP11-589P10.5	-0.020743	0.0063073	0.0010063	3	0.33671	-0.020743	0.0063073	0.0010063	3	0.33671	0	0.0288161
albumin	ENSG00000262319	CTC-457L16.2	0.01158	0.0035013	0.00094202	8	0.79613	0.01158	0.0035013	0.00094202	8	0.79613	0	0.0274714
albumin	ENSG00000262539	RP11-259G18.3	-0.047461	0.008006	3.0635e-09	5	0.016033	-0.048689	0.0061593	2.6799e-15	4	0.1573	1	1.99741e-12
albumin	ENSG00000263503	RP11-707O23.5	-0.022504	0.0030754	2.5266e-13	17	0.054002	-0.022504	0.0030754	2.5266e-13	17	0.054002	0	1.37211e-10
albumin	ENSG00000264070	DND1P1	-0.026623	0.0034462	1.1165e-14	13	0.17377	-0.026623	0.0034462	1.1165e-14	13	0.17377	0	7.62168e-12
albumin	ENSG00000267080	ASB16-AS1	-0.029708	0.0068508	1.4485e-05	10	0.34764	-0.029708	0.0068508	1.4485e-05	10	0.34764	0	0.00110621
ALP	ENSG00000004534	RBM6	-0.0095604	0.0030843	0.0019372	43	0.0008116	-0.0082898	0.0026753	0.0019442	41	0.06149	2	0.0454212
ALP	ENSG00000005486	RHBDD2	0.028879	0.0081561	0.00039897	5	0.23353	0.028879	0.0081561	0.00039897	5	0.23353	0	0.0147557
ALP	ENSG00000005513	SOX8	-0.039227	0.011675	0.00077925	5	0.47458	-0.039227	0.011675	0.00077925	5	0.47458	0	0.0239707
ALP	ENSG00000008838	MED24	-0.043882	0.055924	0.43265	6	3.9572e-07	-0.0842	0.015277	3.5534e-08	4	0.41887	2	6.68941e-06
ALP	ENSG00000009790	TRAF3IP3	0.016475	0.0073305	0.024613	18	0.022755	0.025614	0.0081072	0.0015808	17	0.056255	1	0.0395396
ALP	ENSG00000012048	BRCA1	-0.028179	0.0082202	0.00060812	6	0.5818	-0.028179	0.0082202	0.00060812	6	0.5818	0	0.0201103
ALP	ENSG00000014257	ACPP	-0.015375	0.0052494	0.0034016	28	0.0043365	-0.020229	0.0052014	0.00010062	25	0.071796	3	0.00517664
ALP	ENSG00000023516	AKAP11	0.037409	0.058869	0.52513	7	1.2859e-06	-0.15926	0.035266	6.3043e-06	5	0.19788	2	0.000555299
ALP	ENSG00000023892	DEF6	-0.031537	0.0058542	7.1596e-08	27	3.6797e-05	-0.034659	0.0046513	9.2285e-14	24	0.096965	3	5.40339e-11
ALP	ENSG00000025434	NR1H3	-0.021504	0.0045197	1.9557e-06	24	0.019495	-0.020657	0.003969	1.9443e-07	23	0.16164	1	2.92065e-05
ALP	ENSG00000030066	NUP160	-0.074863	0.032772	0.022349	4	0.039886	-0.091504	0.023352	8.9136e-05	3	0.24313	1	0.00470853
ALP	ENSG00000031691	CENPQ	-0.020635	0.0057869	0.00036278	19	0.51494	-0.020635	0.0057869	0.00036278	19	0.51494	0	0.0137529
ALP	ENSG00000033170	FUT8	-0.023642	0.0063491	0.00019633	12	0.62099	-0.023642	0.0063491	0.00019633	12	0.62099	0	0.00867015
ALP	ENSG00000037280	FLT4	0.036295	0.010352	0.00045454	4	0.56952	0.036295	0.010352	0.00045454	4	0.56952	0	0.0162252
ALP	ENSG00000039523	FAM65A	-0.066085	0.016637	7.1193e-05	6	0.13372	-0.066085	0.016637	7.1193e-05	6	0.13372	0	0.00394621
ALP	ENSG00000040487	PQLC2	0.075708	0.016368	3.7397e-06	3	0.46085	0.075708	0.016368	3.7397e-06	3	0.46085	0	0.000358709
ALP	ENSG00000047579	DTNBP1	0.035466	0.0094042	0.00016242	13	0.00043617	0.032181	0.0075125	1.8386e-05	11	0.065009	2	0.00134531
ALP	ENSG00000047621	C12orf4	0.071755	0.050708	0.15705	5	0.024124	0.13118	0.015043	2.7844e-18	4	0.89658	1	3.08151e-15
ALP	ENSG00000050165	DKK3	0.013823	0.0040107	0.00056778	20	0.61036	0.013823	0.0040107	0.00056778	20	0.61036	0	0.0191292
ALP	ENSG00000054148	PHPT1	-0.021815	0.0061697	0.0004065	6	0.83369	-0.021815	0.0061697	0.0004065	6	0.83369	0	0.014958
ALP	ENSG00000054523	KIF1B	-0.010116	0.0027611	0.00024841	29	0.6119	-0.010116	0.0027611	0.00024841	29	0.6119	0	0.010398
ALP	ENSG00000055950	MRPL43	0.017059	0.0088328	0.053451	17	0.00012885	0.031961	0.007089	6.5282e-06	13	0.13919	4	0.000571061
ALP	ENSG00000056558	TRAF1	-0.051897	0.012448	3.0583e-05	11	0.14957	-0.051897	0.012448	3.0583e-05	11	0.14957	0	0.00202729
ALP	ENSG00000062282	DGAT2	0.081022	0.014492	2.2592e-08	3	0.85903	0.081022	0.014492	2.2592e-08	3	0.85903	0	4.47202e-06
ALP	ENSG00000063176	SPHK2	0.25375	0.013009	9.8795e-85	3	0.68696	0.25375	0.013009	9.8795e-85	3	0.68696	0	2.62409e-80
ALP	ENSG00000064225	ST3GAL6	-0.070187	0.0088212	1.767e-15	11	0.40168	-0.070187	0.0088212	1.767e-15	11	0.40168	0	1.35148e-12
ALP	ENSG00000065308	TRAM2	-0.021659	0.0059524	0.00027393	16	0.87822	-0.021659	0.0059524	0.00027393	16	0.87822	0	0.0111624
ALP	ENSG00000066455	GOLGA5	-0.083846	0.041155	0.041617	5	0.0033514	-0.064039	0.017162	0.0001904	4	0.62828	1	0.00846973
ALP	ENSG00000067182	TNFRSF1A	0.036502	0.01035	0.00042057	7	0.23915	0.036502	0.01035	0.00042057	7	0.23915	0	0.0153406
ALP	ENSG00000069275	NUCKS1	0.033538	0.01324	0.011304	11	0.00026681	0.041796	0.0078106	8.7396e-08	9	0.29792	2	1.46789e-05
ALP	ENSG00000070081	NUCB2	-0.028546	0.007478	0.00013491	5	0.14152	-0.028546	0.007478	0.00013491	5	0.14152	0	0.00649796
ALP	ENSG00000070087	PFN2	-0.011962	0.0049332	0.01532	30	0.043	-0.013337	0.0042747	0.0018089	29	0.31203	1	0.0432883
ALP	ENSG00000071205	ARHGAP10	0.080889	0.019692	3.9973e-05	3	0.29678	0.080889	0.019692	3.9973e-05	3	0.29678	0	0.00250191
ALP	ENSG00000071894	CPSF1	-0.0079297	0.0035865	0.027036	28	0.0027959	-0.0099907	0.0032226	0.0019337	26	0.053921	2	0.045265
ALP	ENSG00000072694	FCGR2B	0.02283	0.004278	9.4725e-08	35	0.00106	0.0257	0.0036975	3.6308e-12	33	0.070113	2	1.62701e-09
ALP	ENSG00000072736	NFATC3	0.048277	0.014701	0.0010238	16	0.00018348	0.037354	0.011367	0.0010159	14	0.080814	2	0.0290228
ALP	ENSG00000072778	ACADVL	-0.085354	0.051197	0.095483	10	0	-0.082884	0.0081836	4.1487e-24	5	0.31581	5	8.41754e-21
ALP	ENSG00000072818	ACAP1	-0.049167	0.026941	0.068009	12	0	-0.055368	0.0073537	5.104e-14	7	0.059032	5	3.1594e-11
ALP	ENSG00000073737	DHRS9	-0.05834	0.0098499	3.162e-09	22	3.2196e-15	-0.061196	0.0053085	9.5481e-31	19	0.1001	3	3.2438e-27
ALP	ENSG00000075420	FNDC3B	-0.035688	0.0095694	0.00019194	7	0.44783	-0.035688	0.0095694	0.00019194	7	0.44783	0	0.00852266
ALP	ENSG00000075826	SEC31B	-0.034989	0.006363	3.8245e-08	23	0.00028018	-0.034957	0.0046767	7.7409e-14	21	0.18765	2	4.60623e-11
ALP	ENSG00000075884	ARHGAP15	-0.013862	0.0043059	0.001285	30	0.42403	-0.013862	0.0043059	0.001285	30	0.42403	0	0.0342826
ALP	ENSG00000077044	DGKD	0.06124	0.014683	3.034e-05	3	0.87894	0.06124	0.014683	3.034e-05	3	0.87894	0	0.00201464
ALP	ENSG00000077984	CST7	0.038825	0.016282	0.017099	20	0	0.035267	0.0067524	1.7614e-07	15	0.15827	5	2.68595e-05
ALP	ENSG00000079459	FDFT1	0.042427	0.0065119	7.255e-11	51	0	0.085296	0.0066187	5.3202e-38	33	0.1181	18	2.87852e-34
ALP	ENSG00000079691	LRRC16A	0.015709	0.0083863	0.061052	26	5.107e-15	0.033231	0.004461	9.3969e-14	21	0.1122	5	5.48002e-11
ALP	ENSG00000080166	DCT	0.16415	0.038447	1.959e-05	3	0.097556	0.16415	0.038447	1.959e-05	3	0.097556	0	0.00141709
ALP	ENSG00000080503	SMARCA2	-0.057129	0.017895	0.0014107	3	0.50665	-0.057129	0.017895	0.0014107	3	0.50665	0	0.03652
ALP	ENSG00000080815	PSEN1	0.033352	0.0098916	0.00074701	15	0.0033802	0.038664	0.0075888	3.489e-07	13	0.22794	2	4.80613e-05
ALP	ENSG00000083123	BCKDHB	-0.054601	0.015668	0.00049237	4	0.80455	-0.054601	0.015668	0.00049237	4	0.80455	0	0.0172344
ALP	ENSG00000083312	TNPO1	0.078058	0.024184	0.001248	3	0.34266	0.078058	0.024184	0.001248	3	0.34266	0	0.0335877
ALP	ENSG00000083799	CYLD	-0.041508	0.013297	0.0017985	3	0.79876	-0.041508	0.013297	0.0017985	3	0.79876	0	0.0431277
ALP	ENSG00000084112	SSH1	-0.034112	0.0092322	0.00022003	3	0.76187	-0.034112	0.0092322	0.00022003	3	0.76187	0	0.00944551
ALP	ENSG00000087074	PPP1R15A	-0.037544	0.01496	0.012086	5	0.023404	-0.041737	0.0089961	3.4941e-06	4	0.37656	1	0.000338149
ALP	ENSG00000087076	HSD17B14	0.07959	0.08751	0.36309	7	0	0.034597	0.0088207	8.7747e-05	3	0.25919	4	0.00465351
ALP	ENSG00000087077	TRIP6	-0.031871	0.012721	0.012228	9	0.019497	-0.054618	0.0097977	2.4808e-08	8	0.16761	1	4.87015e-06
ALP	ENSG00000087206	UIMC1	-0.028192	0.0064522	1.2464e-05	11	0.38742	-0.028192	0.0064522	1.2464e-05	11	0.38742	0	0.000972911
ALP	ENSG00000087502	ERGIC2	0.042694	0.012171	0.000452	3	0.7778	0.042694	0.012171	0.000452	3	0.7778	0	0.0161645
ALP	ENSG00000088538	DOCK3	0.072082	0.01785	5.3881e-05	4	0.94326	0.072082	0.01785	5.3881e-05	4	0.94326	0	0.00317259
ALP	ENSG00000088543	C3orf18	0.10914	0.019175	1.2552e-08	4	0.55119	0.10914	0.019175	1.2552e-08	4	0.55119	0	2.63079e-06
ALP	ENSG00000089157	RPLP0	0.075865	0.024539	0.0019909	3	0.83928	0.075865	0.024539	0.0019909	3	0.83928	0	0.0461579
ALP	ENSG00000090006	LTBP4	-0.055753	0.013834	5.5772e-05	7	0.030653	-0.051995	0.0093955	3.129e-08	6	0.3889	1	5.97907e-06
ALP	ENSG00000090316	MAEA	-0.048902	0.0095236	2.8233e-07	12	0.46562	-0.048902	0.0095236	2.8233e-07	12	0.46562	0	4.01599e-05
ALP	ENSG00000090621	PABPC4	-0.07567	0.028928	0.0089025	4	0.011293	-0.085972	0.026171	0.0010197	3	0.035656	1	0.0290744
ALP	ENSG00000090686	USP48	-0.084676	0.044335	0.056144	15	0	-0.060391	0.0098672	9.3354e-10	7	0.12583	8	2.56549e-07
ALP	ENSG00000091436	MLTK	0.019021	0.0053826	0.0004097	16	0.63223	0.019021	0.0053826	0.0004097	16	0.63223	0	0.0150473
ALP	ENSG00000092295	TGM1	0.028611	0.015549	0.065758	6	0.016216	0.043455	0.011668	0.00019589	4	0.19091	2	0.00865334
ALP	ENSG00000093217	XYLB	0.023248	0.015842	0.14224	7	0.036026	0.032961	0.0098618	0.00083073	6	0.48115	1	0.0250816
ALP	ENSG00000095261	PSMD5	0.071335	0.01103	9.9909e-11	4	0.78666	0.071335	0.01103	9.9909e-11	4	0.78666	0	3.43185e-08
ALP	ENSG00000095485	CWF19L1	-0.017148	0.0065001	0.0083372	27	1.2694e-07	-0.019965	0.0046451	1.7222e-05	22	0.063696	5	0.00127774
ALP	ENSG00000095787	WAC	0.051268	0.0094306	5.4385e-08	9	0.42956	0.051268	0.0094306	5.4385e-08	9	0.42956	0	9.66525e-06
ALP	ENSG00000096717	SIRT1	0.015514	0.0031647	9.4686e-07	23	0.76582	0.015514	0.0031647	9.4686e-07	23	0.76582	0	0.000112916
ALP	ENSG00000096996	IL12RB1	0.038885	0.0082645	2.5385e-06	17	0.0029398	0.032685	0.0065335	5.6536e-07	16	0.11475	1	7.26391e-05
ALP	ENSG00000099194	SCD	0.11217	0.028696	9.2702e-05	5	0.086279	0.11217	0.028696	9.2702e-05	5	0.086279	0	0.00485651
ALP	ENSG00000099308	MAST3	0.067398	0.021181	0.0014625	6	0.021458	0.083438	0.010695	6.1226e-15	5	0.89297	1	4.3001e-12
ALP	ENSG00000099330	OCEL1	-0.015994	0.0050917	0.001683	17	0.68509	-0.015994	0.0050917	0.001683	17	0.68509	0	0.0412484
ALP	ENSG00000099785	MARCH2	0.032146	0.0068941	3.1197e-06	9	0.96696	0.032146	0.0068941	3.1197e-06	9	0.96696	0	0.000306484
ALP	ENSG00000099977	DDT	-0.01811	0.0026478	7.9358e-12	31	0.53674	-0.01811	0.0026478	7.9358e-12	31	0.53674	0	3.41473e-09
ALP	ENSG00000100083	GGA1	0.067487	0.018268	0.00022059	5	0.038994	0.071924	0.014688	9.7367e-07	4	0.19123	1	0.000115829
ALP	ENSG00000100124	ANKRD54	-0.065731	0.011896	3.2889e-08	3	0.54722	-0.065731	0.011896	3.2889e-08	3	0.54722	0	6.25191e-06
ALP	ENSG00000100216	TOMM22	-0.076529	0.016008	1.747e-06	3	0.67911	-0.076529	0.016008	1.747e-06	3	0.67911	0	0.000189536
ALP	ENSG00000100219	XBP1	0.02339	0.0063735	0.0002427	29	0.00032492	0.020869	0.005303	8.309e-05	27	0.058173	2	0.00446011
ALP	ENSG00000100242	SUN2	-0.024178	0.0059979	5.5513e-05	19	0.38346	-0.024178	0.0059979	5.5513e-05	19	0.38346	0	0.00324431
ALP	ENSG00000100299	ARSA	0.024763	0.0057877	1.8808e-05	12	0.58886	0.024763	0.0057877	1.8808e-05	12	0.58886	0	0.00136933
ALP	ENSG00000100413	POLR3H	-0.037764	0.01121	0.00075463	7	0.73441	-0.037764	0.01121	0.00075463	7	0.73441	0	0.0234379
ALP	ENSG00000100985	MMP9	-0.0127	0.038079	0.73874	5	0.0026926	0.079087	0.021386	0.00021723	4	0.341	1	0.00934867
ALP	ENSG00000100994	PYGB	-0.041882	0.0060098	3.1943e-12	34	7.1491e-11	-0.034975	0.0046583	5.9954e-14	28	0.089277	6	3.64174e-11
ALP	ENSG00000101191	DIDO1	-0.032665	0.0094517	0.0005483	5	0.59196	-0.032665	0.0094517	0.0005483	5	0.59196	0	0.0186601
ALP	ENSG00000101294	HM13	-0.029464	0.011812	0.012616	14	4.875e-06	-0.029249	0.0081259	0.00031877	11	0.063828	3	0.0124624
ALP	ENSG00000102753	KPNA3	0.028346	0.030313	0.34973	8	0.0036757	0.085543	0.015743	5.5159e-08	6	0.55176	2	9.78495e-06
ALP	ENSG00000102893	PHKB	0.067579	0.030595	0.027189	7	0.013456	0.093712	0.026837	0.00047971	5	0.099678	2	0.0169129
ALP	ENSG00000102921	N4BP1	0.013433	0.0054444	0.013611	31	0.006268	0.014736	0.0048034	0.0021569	30	0.090106	1	0.0486251
ALP	ENSG00000102977	ACD	-0.057334	0.015539	0.00022442	7	0.2691	-0.057334	0.015539	0.00022442	7	0.2691	0	0.00959309
ALP	ENSG00000103067	ESRP2	-0.025659	0.0078228	0.001038	4	0.8135	-0.025659	0.0078228	0.001038	4	0.8135	0	0.0294869
ALP	ENSG00000103150	MLYCD	-0.089508	0.026954	0.00089763	3	0.27707	-0.089508	0.026954	0.00089763	3	0.27707	0	0.026507
ALP	ENSG00000103199	ZNF500	-0.02207	0.0062503	0.00041396	18	0.094204	-0.02207	0.0062503	0.00041396	18	0.094204	0	0.0151596
ALP	ENSG00000103335	PIEZO1	-0.017563	0.0051252	0.00061075	21	0.36021	-0.017563	0.0051252	0.00061075	21	0.36021	0	0.0201813
ALP	ENSG00000103479	RBL2	0.024888	0.0036465	8.7844e-12	40	0.15157	0.024888	0.0036465	8.7844e-12	40	0.15157	0	3.75774e-09
ALP	ENSG00000103496	STX4	0.020011	0.0061827	0.0012093	13	0.6153	0.020011	0.0061827	0.0012093	13	0.6153	0	0.0328817
ALP	ENSG00000103522	IL21R	0.022761	0.0071452	0.0014447	9	0.991	0.022761	0.0071452	0.0014447	9	0.991	0	0.037101
ALP	ENSG00000104497	SNX16	0.0087089	0.0027461	0.0015174	36	0.5022	0.0087089	0.0027461	0.0015174	36	0.5022	0	0.038381
ALP	ENSG00000104626	ERI1	0.23776	0.08099	0.0033285	4	0.00092888	0.26528	0.071627	0.00021249	3	0.027786	1	0.00919974
ALP	ENSG00000104728	ARHGEF10	0.010848	0.0041782	0.0094231	31	0.035895	0.013532	0.0039592	0.00063138	30	0.13178	1	0.0206372
ALP	ENSG00000104783	KCNN4	0.018313	0.0046404	7.9325e-05	34	0.0022852	0.017195	0.0040131	1.8296e-05	32	0.094774	2	0.00133988
ALP	ENSG00000104805	NUCB1	-0.010935	0.014999	0.46598	15	0	-0.044969	0.0076638	4.4166e-09	10	0.17667	5	1.04006e-06
ALP	ENSG00000104866	PPP1R37	0.052644	0.0086402	1.1091e-09	5	0.29548	0.052644	0.0086402	1.1091e-09	5	0.29548	0	3.00599e-07
ALP	ENSG00000105136	ZNF419	-0.030238	0.016132	0.060875	9	0.029062	-0.048026	0.014882	0.00125	8	0.1744	1	0.0336322
ALP	ENSG00000105223	PLD3	-0.044372	0.010405	2.0049e-05	6	0.9995	-0.044372	0.010405	2.0049e-05	6	0.9995	0	0.00144314
ALP	ENSG00000105258	POLR2I	0.024716	0.0070529	0.00045784	4	0.71884	0.024716	0.0070529	0.00045784	4	0.71884	0	0.0163031
ALP	ENSG00000105373	GLTSCR2	-0.02644	0.0095497	0.0056289	13	0.030714	-0.023782	0.0067805	0.00045239	12	0.6477	1	0.0161662
ALP	ENSG00000105447	GRWD1	-0.020192	0.015193	0.18384	7	0.00052669	-0.026562	0.0086575	0.0021545	6	0.26276	1	0.0485973
ALP	ENSG00000105483	CARD8	-0.019669	0.010983	0.073325	41	0	-0.023451	0.0041121	1.1782e-08	26	0.066442	15	2.48366e-06
ALP	ENSG00000105656	ELL	0.018462	0.005596	0.0009696	16	0.043592	0.0178	0.005278	0.00074503	15	0.11011	1	0.0232261
ALP	ENSG00000105726	ATP13A1	-0.083757	0.012244	7.8823e-12	17	5.9278e-10	-0.091966	0.0066727	3.2535e-43	15	0.13113	2	2.71593e-39
ALP	ENSG00000105856	HBP1	-0.082569	0.01564	1.2955e-07	3	0.67301	-0.082569	0.01564	1.2955e-07	3	0.67301	0	2.0706e-05
ALP	ENSG00000105875	WDR91	0.068779	0.032419	0.033873	5	0.011991	0.085953	0.019176	7.3804e-06	4	0.26017	1	0.000631429
ALP	ENSG00000105963	ADAP1	0.018536	0.0075717	0.014362	15	0.00080109	0.021395	0.005599	0.00013275	14	0.15474	1	0.0064172
ALP	ENSG00000106443	PHF14	0.042509	0.012504	0.00067489	6	0.9839	0.042509	0.012504	0.00067489	6	0.9839	0	0.0216684
ALP	ENSG00000106780	MEGF9	-0.015632	0.0051107	0.0022228	21	0.010025	-0.01428	0.0043297	0.00097334	20	0.15644	1	0.028127
ALP	ENSG00000106804	C5	-0.019863	0.0043774	5.6907e-06	36	0.01497	-0.021	0.004134	3.7799e-07	35	0.059255	1	5.1558e-05
ALP	ENSG00000107281	NPDC1	0.042737	0.012147	0.00043452	4	0.49058	0.042737	0.012147	0.00043452	4	0.49058	0	0.015714
ALP	ENSG00000107611	CUBN	-0.01689	0.0052591	0.0013203	32	0.089278	-0.01689	0.0052591	0.0013203	32	0.089278	0	0.0349218
ALP	ENSG00000107798	LIPA	0.013215	0.0027491	1.5319e-06	49	0.035718	0.012297	0.0026046	2.3414e-06	48	0.12961	1	0.000241641
ALP	ENSG00000107819	SFXN3	0.015393	0.026667	0.56377	8	5.4343e-06	0.045243	0.01369	0.00095029	5	0.21114	3	0.0276623
ALP	ENSG00000107882	SUFU	-0.22011	0.038608	1.1893e-08	3	0.23014	-0.22011	0.038608	1.1893e-08	3	0.23014	0	2.50525e-06
ALP	ENSG00000107949	BCCIP	-0.049808	0.014026	0.00038338	3	0.99409	-0.049808	0.014026	0.00038338	3	0.99409	0	0.0143458
ALP	ENSG00000108179	PPIF	-0.067872	0.012895	1.4145e-07	4	0.82216	-0.067872	0.012895	1.4145e-07	4	0.82216	0	2.21833e-05
ALP	ENSG00000108262	GIT1	0.018812	0.0058588	0.0013235	23	0.12904	0.018812	0.0058588	0.0013235	23	0.12904	0	0.0349748
ALP	ENSG00000108509	CAMTA2	0.038579	0.01206	0.0013795	10	0.12438	0.038579	0.01206	0.0013795	10	0.12438	0	0.0359442
ALP	ENSG00000108578	BLMH	-0.018925	0.010141	0.062005	15	0.00067471	-0.022219	0.0066828	0.00088474	14	0.31007	1	0.0262324
ALP	ENSG00000108883	EFTUD2	0.028049	0.0073471	0.00013474	14	0.88624	0.028049	0.0073471	0.00013474	14	0.88624	0	0.0064962
ALP	ENSG00000110063	DCPS	0.075571	0.027885	0.0067271	14	0	0.036835	0.0089395	3.7809e-05	7	0.16963	7	0.0023952
ALP	ENSG00000110074	FOXRED1	-0.0054739	0.013672	0.68888	31	0	-0.024778	0.0069935	0.00039557	19	0.11486	12	0.0146816
ALP	ENSG00000110448	CD5	0.037062	0.0079851	3.4598e-06	10	0.92673	0.037062	0.0079851	3.4598e-06	10	0.92673	0	0.000336049
ALP	ENSG00000110696	C11orf58	-0.066869	0.026266	0.010902	5	0.032344	-0.078915	0.021129	0.00018785	4	0.16297	1	0.00837287
ALP	ENSG00000110880	CORO1C	0.022015	0.0053337	3.6661e-05	14	0.55011	0.022015	0.0053337	3.6661e-05	14	0.55011	0	0.00233056
ALP	ENSG00000111203	ITFG2	-0.03692	0.0095777	0.00011583	10	0.63122	-0.03692	0.0095777	0.00011583	10	0.63122	0	0.00576133
ALP	ENSG00000111229	ARPC3	0.039144	0.0074324	1.3896e-07	5	0.79871	0.039144	0.0074324	1.3896e-07	5	0.79871	0	2.18986e-05
ALP	ENSG00000111231	GPN3	0.011947	0.0036554	0.0010818	39	0.0029385	0.012383	0.0032609	0.00014629	37	0.071297	2	0.00692265
ALP	ENSG00000111321	LTBR	0.028714	0.013132	0.028771	8	0.0029573	0.032325	0.010571	0.0022298	7	0.079305	1	0.0497351
ALP	ENSG00000111671	SPSB2	-0.0086241	0.0024763	0.00049647	34	0.31924	-0.0086241	0.0024763	0.00049647	34	0.31924	0	0.0173371
ALP	ENSG00000111725	PRKAB1	-0.010096	0.0060397	0.094603	26	1.0778e-06	-0.017787	0.0045586	9.5507e-05	23	0.071855	3	0.00496783
ALP	ENSG00000111801	BTN3A3	-0.019342	0.013838	0.16219	7	4.7894e-06	-0.018701	0.0056235	0.00088251	4	0.42253	3	0.0261914
ALP	ENSG00000111802	TDP2	0.073463	0.087821	0.40287	9	0	0.073741	0.021059	0.00046234	6	0.054698	3	0.0164333
ALP	ENSG00000111913	FAM65B	0.0010177	0.036628	0.97783	16	0	0.044426	0.011957	0.00020276	7	0.13627	9	0.00888828
ALP	ENSG00000112033	PPARD	-0.019078	0.069596	0.78398	6	0.00042697	-0.13947	0.02198	2.2174e-10	3	0.94349	3	7.05727e-08
ALP	ENSG00000112078	KCTD20	0.03946	0.0090595	1.327e-05	6	0.38479	0.03946	0.0090595	1.327e-05	6	0.38479	0	0.00102507
ALP	ENSG00000112282	MED23	-0.046561	0.014712	0.0015514	5	0.10441	-0.046561	0.014712	0.0015514	5	0.10441	0	0.0390172
ALP	ENSG00000112308	C6orf62	0.040111	0.028766	0.1632	23	0	0.074635	0.0091181	2.7132e-16	7	0.070975	16	2.36632e-13
ALP	ENSG00000112576	CCND3	-0.063776	0.014874	1.806e-05	3	0.90431	-0.063776	0.014874	1.806e-05	3	0.90431	0	0.00132678
ALP	ENSG00000112624	GLTSCR1L	-0.033028	0.010397	0.0014895	7	0.73006	-0.033028	0.010397	0.0014895	7	0.73006	0	0.037905
ALP	ENSG00000112651	MRPL2	-0.030895	0.0078685	8.6207e-05	7	0.63946	-0.030895	0.0078685	8.6207e-05	7	0.63946	0	0.00459367
ALP	ENSG00000112701	SENP6	0.021075	0.0052108	5.2428e-05	17	0.73829	0.021075	0.0052108	5.2428e-05	17	0.73829	0	0.00310456
ALP	ENSG00000112763	BTN2A1	-0.043844	0.024819	0.077304	17	0	-0.031714	0.0095489	0.0008962	12	0.17148	5	0.0264755
ALP	ENSG00000112877	CEP72	0.065703	0.01651	6.8998e-05	3	0.66999	0.065703	0.01651	6.8998e-05	3	0.66999	0	0.0038501
ALP	ENSG00000113300	CNOT6	0.01566	0.0046758	0.00081081	14	0.58884	0.01566	0.0046758	0.00081081	14	0.58884	0	0.0246508
ALP	ENSG00000115216	NRBP1	0.12208	0.021417	1.1984e-08	4	0.03493	0.13069	0.0097544	6.1662e-41	3	0.51138	1	4.0945e-37
ALP	ENSG00000115234	SNX17	0.040621	0.055826	0.46684	5	1.9145e-08	0.098454	0.023687	3.2319e-05	3	0.027139	2	0.0021194
ALP	ENSG00000115590	IL1R2	-0.029933	0.0074572	5.9712e-05	15	0.36019	-0.029933	0.0074572	5.9712e-05	15	0.36019	0	0.00342617
ALP	ENSG00000116133	DHCR24	-0.021812	0.0070346	0.001931	10	0.57687	-0.021812	0.0070346	0.001931	10	0.57687	0	0.0452176
ALP	ENSG00000116678	LEPR	-0.00027224	0.0084879	0.97441	22	2.3747e-05	0.019587	0.0063055	0.0018943	20	0.085424	2	0.0446589
ALP	ENSG00000117090	SLAMF1	0.041992	0.011528	0.00026972	7	0.56154	0.041992	0.011528	0.00026972	7	0.56154	0	0.0110416
ALP	ENSG00000117174	ZNHIT6	-0.032682	0.0071907	5.4939e-06	11	0.94628	-0.032682	0.0071907	5.4939e-06	11	0.94628	0	0.000497105
ALP	ENSG00000117500	TMED5	-0.034589	0.0061431	1.7962e-08	23	0.0099655	-0.032335	0.0056629	1.1298e-08	22	0.060992	1	2.39198e-06
ALP	ENSG00000117505	DR1	0.02971	0.0045359	5.7509e-11	30	0.056227	0.02971	0.0045359	5.7509e-11	30	0.056227	0	2.09245e-08
ALP	ENSG00000117528	ABCD3	-0.025022	0.007175	0.00048784	12	0.62461	-0.025022	0.007175	0.00048784	12	0.62461	0	0.0171234
ALP	ENSG00000118520	ARG1	-0.019658	0.0063568	0.0019858	19	0.007693	-0.020849	0.0057932	0.00031965	18	0.055291	1	0.0124864
ALP	ENSG00000118785	SPP1	0.017569	0.0049124	0.00034843	28	0.0033875	0.016619	0.0039287	2.3357e-05	27	0.22575	1	0.00163298
ALP	ENSG00000118900	UBN1	0.083099	0.022851	0.00027624	3	0.5434	0.083099	0.022851	0.00027624	3	0.5434	0	0.011233
ALP	ENSG00000119403	PHF19	-0.053725	0.011578	3.4791e-06	12	0.047917	-0.050812	0.010357	9.2978e-07	11	0.17291	1	0.000111106
ALP	ENSG00000119408	NEK6	0.023576	0.0047646	7.4876e-07	20	0.53207	0.023576	0.0047646	7.4876e-07	20	0.53207	0	9.2345e-05
ALP	ENSG00000119599	DCAF4	0.0068034	0.0041767	0.10333	36	4.6714e-05	0.012104	0.0035338	0.00061455	32	0.06319	4	0.0202656
ALP	ENSG00000119684	MLH3	-0.038678	0.0057539	1.7919e-11	20	0.02951	-0.036843	0.0051173	6.0312e-13	19	0.15556	1	3.08066e-10
ALP	ENSG00000119718	EIF2B2	-0.024602	0.0048158	3.2449e-07	34	0.0030719	-0.030958	0.0042842	4.9755e-13	31	0.14458	3	2.56383e-10
ALP	ENSG00000119906	FAM178A	-0.050795	0.01133	7.3572e-06	6	0.39246	-0.050795	0.01133	7.3572e-06	6	0.39246	0	0.000630367
ALP	ENSG00000120029	C10orf76	0.053271	0.021374	0.012691	10	0.00060023	0.05944	0.016055	0.00021363	8	0.15163	2	0.00923454
ALP	ENSG00000120647	CCDC77	0.041023	0.013319	0.0020692	17	0	0.04067	0.0057253	1.2158e-12	13	0.075097	4	5.88113e-10
ALP	ENSG00000120688	WBP4	-0.073112	0.0356	0.040005	6	0.019896	-0.10987	0.028319	0.00010455	5	0.054959	1	0.00532445
ALP	ENSG00000120709	FAM53C	-0.066959	0.019104	0.00045648	3	0.67986	-0.066959	0.019104	0.00045648	3	0.67986	0	0.0162706
ALP	ENSG00000120833	SOCS2	-0.029395	0.0080323	0.00025254	12	0.58228	-0.029395	0.0080323	0.00025254	12	0.58228	0	0.0105211
ALP	ENSG00000121083	DYNLL2	-0.023617	0.0077209	0.0022224	10	0.70778	-0.023617	0.0077209	0.0022224	10	0.70778	0	0.049608
ALP	ENSG00000122378	FAM213A	-0.017791	0.004729	0.00016854	17	0.73002	-0.017791	0.004729	0.00016854	17	0.73002	0	0.00771944
ALP	ENSG00000122483	CCDC18	-0.056247	0.051193	0.27189	5	0.00026951	-0.067642	0.019673	0.00058552	3	0.31519	2	0.0195689
ALP	ENSG00000123268	ATF1	-0.035749	0.010937	0.0010806	11	0.017194	-0.038875	0.0093526	3.2299e-05	10	0.13664	1	0.00211872
ALP	ENSG00000123297	TSFM	0.047501	0.012396	0.00012718	5	0.11969	0.047501	0.012396	0.00012718	5	0.11969	0	0.00621063
ALP	ENSG00000123427	METTL21B	-0.010143	0.0025543	7.1622e-05	48	0.0735	-0.010143	0.0025543	7.1622e-05	48	0.0735	0	0.00396698
ALP	ENSG00000123609	NMI	-0.022389	0.0070563	0.0015093	10	0.77067	-0.022389	0.0070563	0.0015093	10	0.77067	0	0.038239
ALP	ENSG00000123815	ADCK4	0.15972	0.027952	1.1017e-08	3	0.36025	0.15972	0.027952	1.1017e-08	3	0.36025	0	2.33927e-06
ALP	ENSG00000124067	SLC12A4	0.14722	0.0289	3.501e-07	3	0.24664	0.14722	0.0289	3.501e-07	3	0.24664	0	4.81812e-05
ALP	ENSG00000124299	PEPD	-0.10131	0.031374	0.0012422	5	0.0048948	-0.1261	0.021305	3.2416e-09	3	0.15736	2	7.8728e-07
ALP	ENSG00000124532	MRS2	0.1614	0.043282	0.00019219	17	0	0.12156	0.012639	6.6751e-22	5	0.090154	12	1.05993e-18
ALP	ENSG00000124564	SLC17A3	0.015141	0.019215	0.43071	9	1.0542e-07	0.030403	0.0096337	0.0016002	5	0.1903	4	0.0398942
ALP	ENSG00000124614	RPS10	0.023015	0.0068724	0.00081118	3	0.85985	0.023015	0.0068724	0.00081118	3	0.85985	0	0.0246569
ALP	ENSG00000124641	MED20	0.035157	0.036959	0.34148	5	0.0012214	0.052958	0.014227	0.00019734	4	0.60864	1	0.00870686
ALP	ENSG00000125388	GRK4	0.018209	0.0056366	0.0012355	18	0.49439	0.018209	0.0056366	0.0012355	18	0.49439	0	0.0333619
ALP	ENSG00000125457	MIF4GD	0.024096	0.0061745	9.5213e-05	12	0.31434	0.024096	0.0061745	9.5213e-05	12	0.31434	0	0.00495606
ALP	ENSG00000125618	PAX8	0.019104	0.0086399	0.02703	22	1.2577e-07	0.020088	0.0061319	0.0010532	17	0.060534	5	0.0298056
ALP	ENSG00000125733	TRIP10	-0.034917	0.0087363	6.4206e-05	7	0.63211	-0.034917	0.0087363	6.4206e-05	7	0.63211	0	0.00363452
ALP	ENSG00000126860	EVI2A	-0.037645	0.0096267	9.2118e-05	20	0.0013355	-0.034264	0.0077438	9.6559e-06	19	0.096292	1	0.000788255
ALP	ENSG00000127124	HIVEP3	0.029153	0.0074704	9.5206e-05	12	0.76861	0.029153	0.0074704	9.5206e-05	12	0.76861	0	0.00495606
ALP	ENSG00000127399	LRRC61	0.027978	0.0058977	2.0961e-06	10	0.93117	0.027978	0.0058977	2.0961e-06	10	0.93117	0	0.000221489
ALP	ENSG00000127580	WDR24	-0.031508	0.0090293	0.0004839	5	0.98722	-0.031508	0.0090293	0.0004839	5	0.98722	0	0.0170257
ALP	ENSG00000127603	MACF1	0.05062	0.01069	2.1887e-06	10	0.0031719	0.052624	0.0085765	8.4702e-10	9	0.078931	1	2.36817e-07
ALP	ENSG00000127838	PNKD	-0.03322	0.0039913	8.5829e-17	27	0.69338	-0.03322	0.0039913	8.5829e-17	27	0.69338	0	8.03739e-14
ALP	ENSG00000127952	STYXL1	-0.011704	0.0033455	0.00046782	24	0.086102	-0.011704	0.0033455	0.00046782	24	0.086102	0	0.0165938
ALP	ENSG00000127957	PMS2P3	-0.011692	0.0032868	0.00037483	8	0.62679	-0.011692	0.0032868	0.00037483	8	0.62679	0	0.0140945
ALP	ENSG00000128245	YWHAH	0.015513	0.0047477	0.0010855	21	0.879	0.015513	0.0047477	0.0010855	21	0.879	0	0.0304512
ALP	ENSG00000128268	MGAT3	0.034288	0.016733	0.040449	11	7.9391e-07	0.034975	0.010884	0.0013116	8	0.053838	3	0.0347678
ALP	ENSG00000128284	APOL3	0.037235	0.04131	0.3674	6	4.2345e-05	0.081273	0.023185	0.0004559	3	0.086265	3	0.0162539
ALP	ENSG00000129219	PLD2	0.017555	0.0046629	0.0001666	16	0.52503	0.017555	0.0046629	0.0001666	16	0.52503	0	0.00764978
ALP	ENSG00000129353	SLC44A2	0.017413	0.0051946	0.00080197	16	0.11266	0.017413	0.0051946	0.00080197	16	0.11266	0	0.0244482
ALP	ENSG00000129354	AP1M2	0.020524	0.0062893	0.0011011	15	0.67372	0.020524	0.0062893	0.0011011	15	0.67372	0	0.0307765
ALP	ENSG00000129933	MAU2	0.029097	0.0090999	0.0013863	21	0	0.053653	0.0047765	2.8191e-29	12	0.16552	9	8.4913e-26
ALP	ENSG00000130202	PVRL2	-0.0033982	0.011331	0.76424	18	0	0.016666	0.0047383	0.00043608	13	0.10862	5	0.015751
ALP	ENSG00000130511	SSBP4	-0.026079	0.0077447	0.00075915	3	0.86264	-0.026079	0.0077447	0.00075915	3	0.86264	0	0.0235482
ALP	ENSG00000130518	KIAA1683	-0.016355	0.0042161	0.00010479	28	0.12053	-0.016355	0.0042161	0.00010479	28	0.12053	0	0.00533388
ALP	ENSG00000130856	ZNF236	0.059586	0.017061	0.00047843	4	0.33751	0.059586	0.017061	0.00047843	4	0.33751	0	0.01688
ALP	ENSG00000131067	GGT7	0.042532	0.013184	0.0012557	7	0.20533	0.042532	0.013184	0.0012557	7	0.20533	0	0.033739
ALP	ENSG00000131484	RP11-798G7.5	0.025651	0.0061651	3.1744e-05	7	0.14786	0.025651	0.0061651	3.1744e-05	7	0.14786	0	0.00208746
ALP	ENSG00000132170	PPARG	-0.011352	0.022935	0.62061	7	0.00022719	-0.040247	0.012285	0.0010527	5	0.17582	2	0.0298002
ALP	ENSG00000132436	FIGNL1	0.017851	0.0047191	0.00015516	28	0.62306	0.017851	0.0047191	0.00015516	28	0.62306	0	0.00723824
ALP	ENSG00000132514	CLEC10A	-0.079344	0.042101	0.059481	9	0	-0.051208	0.014251	0.00032638	5	0.054907	4	0.0126874
ALP	ENSG00000132740	IGHMBP2	0.013	0.0044078	0.0031851	29	0.0026086	0.011048	0.0034497	0.0013624	28	0.24906	1	0.0356742
ALP	ENSG00000132842	AP3B1	0.031216	0.0040917	2.3678e-14	25	0.80135	0.031216	0.0040917	2.3678e-14	25	0.80135	0	1.53392e-11
ALP	ENSG00000133193	FAM104A	-0.024877	0.0078226	0.0014722	8	0.40146	-0.024877	0.0078226	0.0014722	8	0.40146	0	0.0375983
ALP	ENSG00000134242	PTPN22	-0.055642	0.016916	0.001004	4	0.14277	-0.055642	0.016916	0.001004	4	0.14277	0	0.0287615
ALP	ENSG00000134333	LDHA	0.034218	0.0097309	0.00043735	5	0.64234	0.034218	0.0097309	0.00043735	5	0.64234	0	0.0157832
ALP	ENSG00000134575	ACP2	-0.019892	0.0057273	0.00051441	27	1.9988e-05	-0.022106	0.0044205	5.7139e-07	25	0.053175	2	7.31564e-05
ALP	ENSG00000134824	FADS2	0.045432	0.008512	9.4297e-08	26	4.9627e-14	0.03357	0.0058326	8.6358e-09	23	0.054604	3	1.88574e-06
ALP	ENSG00000134825	TMEM258	0.12673	0.016155	4.3509e-15	9	0.0014814	0.13875	0.011734	2.9064e-32	7	0.09435	2	1.11732e-28
ALP	ENSG00000135045	C9orf40	-0.049519	0.014582	0.0006842	4	0.42161	-0.049519	0.014582	0.0006842	4	0.42161	0	0.0218712
ALP	ENSG00000135297	MTO1	-0.021263	0.0049921	2.05e-05	18	0.43486	-0.021263	0.0049921	2.05e-05	18	0.43486	0	0.00146945
ALP	ENSG00000135407	AVIL	-0.032213	0.010307	0.0017751	6	0.0088199	-0.029587	0.0075163	8.2709e-05	5	0.14986	1	0.00444375
ALP	ENSG00000136144	RCBTB1	-0.015807	0.0047711	0.00092258	26	0.042948	-0.013879	0.0045126	0.0021015	25	0.12236	1	0.047845
ALP	ENSG00000136247	ZDHHC4	-0.0209	0.0044005	2.0391e-06	24	0.41122	-0.0209	0.0044005	2.0391e-06	24	0.41122	0	0.000216484
ALP	ENSG00000136271	DDX56	0.028291	0.0091715	0.0020378	12	0.1318	0.028291	0.0091715	0.0020378	12	0.1318	0	0.0468585
ALP	ENSG00000136573	BLK	-0.069399	0.011723	3.2222e-09	37	0	-0.063435	0.0059863	3.088e-26	27	0.074733	10	7.51851e-23
ALP	ENSG00000136870	ZNF189	-0.042407	0.018096	0.019107	5	0.010411	-0.047216	0.009464	6.0699e-07	4	0.76698	1	7.69389e-05
ALP	ENSG00000136874	STX17	-0.038732	0.021065	0.065968	5	0.014957	-0.046588	0.013998	0.000874	4	0.23517	1	0.0260249
ALP	ENSG00000136933	RABEPK	0.019183	0.0044528	1.6471e-05	30	0.097961	0.019183	0.0044528	1.6471e-05	30	0.097961	0	0.00123172
ALP	ENSG00000136982	DSCC1	-0.031552	0.018234	0.083551	5	0.001045	-0.026732	0.0080391	0.00088347	4	0.69641	1	0.0262054
ALP	ENSG00000137074	APTX	0.036498	0.0096681	0.00015992	10	0.35397	0.036498	0.0096681	0.00015992	10	0.35397	0	0.00741177
ALP	ENSG00000137161	CNPY3	-0.055631	0.017583	0.0015564	5	0.40555	-0.055631	0.017583	0.0015564	5	0.40555	0	0.0391034
ALP	ENSG00000137166	FOXP4	-0.063724	0.019603	0.0011507	4	0.38092	-0.063724	0.019603	0.0011507	4	0.38092	0	0.0317499
ALP	ENSG00000137414	FAM8A1	0.045178	0.013497	0.00081643	5	0.66831	0.045178	0.013497	0.00081643	5	0.66831	0	0.024765
ALP	ENSG00000137601	NEK1	-0.024054	0.0072006	0.00083618	10	0.52723	-0.024054	0.0072006	0.00083618	10	0.52723	0	0.025207
ALP	ENSG00000137764	MAP2K5	0.019161	0.0042415	6.2564e-06	27	0.44127	0.019161	0.0042415	6.2564e-06	27	0.44127	0	0.000551579
ALP	ENSG00000137824	RMDN3	0.035349	0.0079157	7.9823e-06	9	0.30929	0.035349	0.0079157	7.9823e-06	9	0.30929	0	0.000673459
ALP	ENSG00000137834	SMAD6	-0.058721	0.01567	0.00017874	5	0.57541	-0.058721	0.01567	0.00017874	5	0.57541	0	0.00807443
ALP	ENSG00000137880	GCHFR	0.031931	0.008932	0.00035036	7	0.30179	0.031931	0.008932	0.00035036	7	0.30179	0	0.013401
ALP	ENSG00000137942	FNBP1L	0.046471	0.024125	0.054071	7	3.8187e-05	0.040478	0.0097561	3.3389e-05	5	0.53976	2	0.00217606
ALP	ENSG00000138074	SLC5A6	0.022806	0.016111	0.1569	24	0	0.037265	0.0077266	1.4142e-06	14	0.050232	10	0.000158613
ALP	ENSG00000138085	ATRAID	-0.052468	0.017	0.002026	19	0	-0.052495	0.0089113	3.8436e-09	11	0.05301	8	9.18973e-07
ALP	ENSG00000138246	DNAJC13	-0.088008	0.0088808	3.7696e-23	8	0.57912	-0.088008	0.0088808	3.7696e-23	8	0.57912	0	6.92682e-20
ALP	ENSG00000138468	SENP7	-0.024191	0.0043814	3.3641e-08	29	0.10074	-0.024191	0.0043814	3.3641e-08	29	0.10074	0	6.37412e-06
ALP	ENSG00000138750	NUP54	-0.047774	0.017014	0.0049877	6	0.041361	-0.043147	0.013624	0.0015407	5	0.2012	1	0.0388024
ALP	ENSG00000138801	PAPSS1	-0.0079339	0.002422	0.0010536	43	0.41664	-0.0079339	0.002422	0.0010536	43	0.41664	0	0.029814
ALP	ENSG00000139625	MAP3K12	-0.072302	0.031845	0.023182	6	0.0099047	-0.088496	0.026014	0.0006692	5	0.12759	1	0.0215331
ALP	ENSG00000139626	ITGB7	0.014787	0.0092665	0.11054	14	0.00016954	0.017794	0.0053866	0.00095545	13	0.41992	1	0.0277691
ALP	ENSG00000139629	GALNT6	0.026437	0.0060215	1.1314e-05	19	0.25927	0.026437	0.0060215	1.1314e-05	19	0.25927	0	0.000897776
ALP	ENSG00000140092	FBLN5	-0.0083363	0.0041069	0.042373	53	1.1133e-05	-0.010346	0.0033017	0.0017265	49	0.076292	4	0.042001
ALP	ENSG00000140382	HMG20A	0.053626	0.018065	0.0029925	7	0.028044	0.046791	0.014313	0.0010786	6	0.18306	1	0.030316
ALP	ENSG00000140545	MFGE8	-0.032013	0.0072358	9.6754e-06	12	0.077757	-0.032013	0.0072358	9.6754e-06	12	0.077757	0	0.000789446
ALP	ENSG00000141002	TCF25	-0.02364	0.0072809	0.0011666	14	0.21716	-0.02364	0.0072809	0.0011666	14	0.21716	0	0.0320735
ALP	ENSG00000141027	NCOR1	0.035024	0.0069423	4.5357e-07	11	0.81237	0.035024	0.0069423	4.5357e-07	11	0.81237	0	6.02362e-05
ALP	ENSG00000141298	SSH2	-0.011337	0.0053047	0.032585	17	0.035251	-0.015785	0.0046019	0.00060335	16	0.2211	1	0.0199995
ALP	ENSG00000141504	SAT2	-0.048142	0.015544	0.0019535	10	0.00016367	-0.041989	0.01162	0.00030199	8	0.064663	2	0.0119897
ALP	ENSG00000142102	ATHL1	-0.02232	0.011876	0.060178	12	1.1102e-16	-0.024921	0.0047501	1.5498e-07	6	0.13599	6	2.40088e-05
ALP	ENSG00000142233	NTN5	-0.42376	0.040575	1.5597e-25	7	0.00011492	-0.45901	0.024054	3.5496e-81	3	0.15324	4	8.64239e-77
ALP	ENSG00000142655	PEX14	-0.040826	0.010778	0.0001519	4	0.90178	-0.040826	0.010778	0.0001519	4	0.90178	0	0.00712942
ALP	ENSG00000142794	NBPF3	0.18144	0.040284	6.6673e-06	17	0	0.21584	0.0082546	1.0477e-150	8	0.36372	9	7.65266e-146
ALP	ENSG00000142798	HSPG2	-0.028937	0.021412	0.17655	9	2.5025e-10	-0.058304	0.0083657	3.1836e-12	6	0.14181	3	1.4421e-09
ALP	ENSG00000143324	XPR1	0.12077	0.023757	3.7032e-07	3	0.70224	0.12077	0.023757	3.7032e-07	3	0.70224	0	5.0725e-05
ALP	ENSG00000143889	HNRPLL	-0.031578	0.0093203	0.00070389	7	0.9337	-0.031578	0.0093203	0.00070389	7	0.9337	0	0.0223369
ALP	ENSG00000144043	TEX261	0.064028	0.015455	3.4278e-05	4	0.46386	0.064028	0.015455	3.4278e-05	4	0.46386	0	0.00221862
ALP	ENSG00000144401	METTL21A	-0.014229	0.0030631	3.3933e-06	29	0.24018	-0.014229	0.0030631	3.3933e-06	29	0.24018	0	0.000330253
ALP	ENSG00000144668	ITGA9	0.033074	0.010187	0.0011673	9	0.27801	0.033074	0.010187	0.0011673	9	0.27801	0	0.0320837
ALP	ENSG00000145020	AMT	0.019477	0.0045403	1.7873e-05	34	0.04362	0.020276	0.0043035	2.4603e-06	33	0.12176	1	0.000252308
ALP	ENSG00000145029	NICN1	-0.025088	0.0058851	2.0181e-05	20	0.20004	-0.025088	0.0058851	2.0181e-05	20	0.20004	0	0.0014505
ALP	ENSG00000145107	TM4SF19	0.045565	0.012167	0.00018047	4	0.45092	0.045565	0.012167	0.00018047	4	0.45092	0	0.008132
ALP	ENSG00000145332	KLHL8	0.053763	0.021451	0.012199	7	0.0060902	0.066682	0.016438	4.981e-05	6	0.10725	1	0.002984
ALP	ENSG00000145354	CISD2	0.071612	0.019677	0.00027341	6	0.02883	0.076533	0.017755	1.6282e-05	5	0.10041	1	0.00122009
ALP	ENSG00000145685	LHFPL2	0.056547	0.011313	5.7751e-07	5	0.95673	0.056547	0.011313	5.7751e-07	5	0.95673	0	7.36894e-05
ALP	ENSG00000145949	MYLK4	-0.024579	0.0063651	0.0001127	7	0.22204	-0.024579	0.0063651	0.0001127	7	0.22204	0	0.00563925
ALP	ENSG00000146021	KLHL3	-0.029012	0.0089413	0.0011757	8	0.56983	-0.029012	0.0089413	0.0011757	8	0.56983	0	0.0322448
ALP	ENSG00000146830	GIGYF1	0.037189	0.013791	0.0070064	11	0.012309	0.040616	0.012356	0.001012	10	0.071098	1	0.0289538
ALP	ENSG00000147799	ARHGAP39	-0.094188	0.023199	4.9064e-05	4	0.27736	-0.094188	0.023199	4.9064e-05	4	0.27736	0	0.00294777
ALP	ENSG00000148180	GSN	-0.022717	0.0036297	3.8834e-10	39	0.062278	-0.022717	0.0036297	3.8834e-10	39	0.062278	0	1.17698e-07
ALP	ENSG00000148200	NR6A1	0.07192	0.022314	0.001268	3	0.94983	0.07192	0.022314	0.001268	3	0.94983	0	0.0339664
ALP	ENSG00000148290	SURF1	0.036231	0.06195	0.55865	10	0	0.044979	0.004058	1.5025e-28	3	0.57891	7	4.30378e-25
ALP	ENSG00000148296	SURF6	0.0033047	0.082808	0.96817	8	0	-0.099824	0.008922	4.642e-29	3	0.30931	5	1.38393e-25
ALP	ENSG00000148297	MED22	0.0079085	0.078491	0.91974	14	0	-0.1015	0.0087996	8.807e-31	4	0.36241	10	3.02722e-27
ALP	ENSG00000148396	SEC16A	-0.046308	0.012487	0.00020838	5	0.087925	-0.046308	0.012487	0.00020838	5	0.087925	0	0.00906527
ALP	ENSG00000148803	FUOM	-0.033205	0.0079086	2.6864e-05	6	0.7921	-0.033205	0.0079086	2.6864e-05	6	0.7921	0	0.00182829
ALP	ENSG00000148832	PAOX	-0.034971	0.0088021	7.0952e-05	8	0.44875	-0.034971	0.0088021	7.0952e-05	8	0.44875	0	0.00393509
ALP	ENSG00000148848	ADAM12	0.052578	0.013935	0.00016134	5	0.522	0.052578	0.013935	0.00016134	5	0.522	0	0.00746693
ALP	ENSG00000149131	SERPING1	-0.033028	0.011624	0.0044911	10	0.021817	-0.037569	0.010589	0.00038824	9	0.076711	1	0.0144776
ALP	ENSG00000149177	PTPRJ	0.049743	0.026704	0.062491	5	0.00017076	0.050446	0.010154	6.7663e-07	3	0.58747	2	8.43752e-05
ALP	ENSG00000149179	C11orf49	0.093651	0.024547	0.00013608	4	0.31006	0.093651	0.024547	0.00013608	4	0.31006	0	0.00654784
ALP	ENSG00000149243	KLHL35	-0.027221	0.0053913	4.4385e-07	20	0.48415	-0.027221	0.0053913	4.4385e-07	20	0.48415	0	5.92686e-05
ALP	ENSG00000149289	ZC3H12C	-0.01995	0.0050859	8.7597e-05	16	0.23765	-0.01995	0.0050859	8.7597e-05	16	0.23765	0	0.00465078
ALP	ENSG00000149485	FADS1	0.10488	0.013997	6.7491e-14	21	5.4198e-08	0.03805	0.01049	0.0002864	19	0.2023	2	0.0115354
ALP	ENSG00000149531	FRG1B	-0.028922	0.011299	0.010474	10	4.4806e-06	-0.036305	0.0070594	2.708e-07	8	0.10026	2	3.87272e-05
ALP	ENSG00000150527	CTAGE5	-0.081143	0.023702	0.00061818	3	0.44101	-0.081143	0.023702	0.00061818	3	0.44101	0	0.0203462
ALP	ENSG00000151135	C12orf23	0.056195	0.0095415	3.8734e-09	11	0.10043	0.056195	0.0095415	3.8734e-09	11	0.10043	0	9.24584e-07
ALP	ENSG00000151247	EIF4E	-0.076233	0.017973	2.221e-05	7	0.00090539	-0.092051	0.011531	1.429e-15	5	0.19184	2	1.11336e-12
ALP	ENSG00000151553	FAM160B1	-0.047841	0.017212	0.0054438	9	0.0024973	-0.055759	0.013678	4.5696e-05	8	0.053314	1	0.00278959
ALP	ENSG00000152127	MGAT5	-0.052839	0.017053	0.0019452	8	0.2417	-0.052839	0.017053	0.0019452	8	0.2417	0	0.0454372
ALP	ENSG00000152409	JMY	-0.023945	0.0084225	0.0044693	12	0.042685	-0.02664	0.006865	0.00010424	11	0.27974	1	0.00531195
ALP	ENSG00000152527	PLEKHH2	0.02473	0.0074111	0.00084706	17	0.034314	0.02227	0.0065517	0.00067615	16	0.16761	1	0.0217057
ALP	ENSG00000152672	CLEC4F	-0.0068122	0.0031392	0.030001	45	0.0010179	-0.0083836	0.0027371	0.0021913	42	0.076631	3	0.0491277
ALP	ENSG00000152700	SAR1B	0.025371	0.0080967	0.0017271	7	0.59683	0.025371	0.0080967	0.0017271	7	0.59683	0	0.0420121
ALP	ENSG00000152749	GPR180	0.033689	0.0066337	3.804e-07	30	6.4381e-12	0.021911	0.0041403	1.2082e-07	24	0.069211	6	1.94812e-05
ALP	ENSG00000153094	BCL2L11	-0.11709	0.037296	0.0016927	5	0.049334	-0.13698	0.019636	3.035e-12	4	0.64928	1	1.38423e-09
ALP	ENSG00000153201	RANBP2	0.064119	0.018818	0.0006559	4	0.53818	0.064119	0.018818	0.0006559	4	0.53818	0	0.0212253
ALP	ENSG00000153214	TMEM87B	-0.022012	0.0071145	0.0019753	8	0.6789	-0.022012	0.0071145	0.0019753	8	0.6789	0	0.0459164
ALP	ENSG00000153551	CMTM7	0.021048	0.0056781	0.00020993	22	0.79605	0.021048	0.0056781	0.00020993	22	0.79605	0	0.00911371
ALP	ENSG00000154319	FAM167A	0.037688	0.0090892	3.3763e-05	49	0	0.057641	0.0051181	2.0159e-29	29	0.056586	20	6.13527e-26
ALP	ENSG00000154930	ACSS1	-0.033447	0.025115	0.18294	11	4.6363e-12	-0.059791	0.012283	1.1295e-06	7	0.079094	4	0.000132002
ALP	ENSG00000155189	AGPAT5	-0.062437	0.023448	0.007748	5	0.036504	-0.067921	0.020673	0.0010179	4	0.17649	1	0.029043
ALP	ENSG00000156510	HKDC1	0.015651	0.0041499	0.00016233	25	0.15984	0.015651	0.0041499	0.00016233	25	0.15984	0	0.00750324
ALP	ENSG00000156599	ZDHHC5	-0.028262	0.0091947	0.0021138	16	0.1033	-0.028262	0.0091947	0.0021138	16	0.1033	0	0.0480128
ALP	ENSG00000156735	BAG4	0.04042	0.013139	0.0020947	4	0.15895	0.04042	0.013139	0.0020947	4	0.15895	0	0.0477386
ALP	ENSG00000157450	RNF111	0.093039	0.027034	0.00057835	3	0.73772	0.093039	0.027034	0.00057835	3	0.73772	0	0.0193845
ALP	ENSG00000157782	CABP1	-0.056502	0.011896	2.0385e-06	3	0.84952	-0.056502	0.011896	2.0385e-06	3	0.84952	0	0.000216484
ALP	ENSG00000157837	SPPL3	-0.080295	0.030435	0.0083333	8	1.4129e-06	-0.11216	0.013699	2.6707e-16	5	0.27411	3	2.33622e-13
ALP	ENSG00000157895	C12orf43	0.096413	0.019074	4.3127e-07	18	3.1952e-13	0.036741	0.011105	0.00093774	14	0.078665	4	0.027387
ALP	ENSG00000157992	KRTCAP3	-0.039388	0.021485	0.066756	8	1.1018e-10	-0.055566	0.011266	8.1253e-07	5	0.060426	3	9.89566e-05
ALP	ENSG00000158373	HIST1H2BD	-0.0022848	0.0085679	0.78973	28	0	-0.01948	0.0050829	0.0001269	20	0.0609	8	0.00620006
ALP	ENSG00000158406	HIST1H4H	0.025335	0.010323	0.014116	15	3.4787e-05	0.039869	0.0085356	2.9989e-06	9	0.064016	6	0.000296912
ALP	ENSG00000158555	GDPD5	0.010705	0.0033113	0.0012259	34	0.42031	0.010705	0.0033113	0.0012259	34	0.42031	0	0.0332009
ALP	ENSG00000158748	HTR6	0.032085	0.0073353	1.2198e-05	5	0.88644	0.032085	0.0073353	1.2198e-05	5	0.88644	0	0.000957263
ALP	ENSG00000158792	SPATA2L	-0.02368	0.0060746	9.6902e-05	19	0.19148	-0.02368	0.0060746	9.6902e-05	19	0.19148	0	0.00502607
ALP	ENSG00000158825	CDA	-0.017379	0.0085594	0.042317	28	0	-0.022369	0.0037072	1.5985e-09	18	0.10029	10	4.17367e-07
ALP	ENSG00000159199	ATP5G1	-0.053313	0.0071503	8.9139e-14	10	0.47306	-0.053313	0.0071503	8.9139e-14	10	0.47306	0	5.26136e-11
ALP	ENSG00000159873	CCDC117	0.061081	0.024625	0.013119	7	0.0083987	0.095045	0.015915	2.345e-09	5	0.33874	2	5.8962e-07
ALP	ENSG00000159882	ZNF230	0.070646	0.022418	0.0016253	4	0.37321	0.070646	0.022418	0.0016253	4	0.37321	0	0.040293
ALP	ENSG00000160049	DFFA	-0.035362	0.0092464	0.00013106	16	0.1551	-0.035362	0.0092464	0.00013106	16	0.1551	0	0.00635865
ALP	ENSG00000160075	SSU72	0.019542	0.0082971	0.018511	8	0.0038175	0.025216	0.0074159	0.00067329	6	0.060757	2	0.0216337
ALP	ENSG00000160325	CACFD1	0.072816	0.062439	0.24354	7	9.3365e-08	0.16587	0.018959	2.1574e-18	3	0.38971	4	2.42434e-15
ALP	ENSG00000160410	SHKBP1	0.015512	0.0076551	0.042721	33	1.0214e-14	0.018194	0.0046494	9.1064e-05	24	0.10596	9	0.00478528
ALP	ENSG00000160447	PKN3	-0.02188	0.0058378	0.00017823	13	0.74988	-0.02188	0.0058378	0.00017823	13	0.74988	0	0.00805966
ALP	ENSG00000160796	NBEAL2	0.072179	0.015966	6.1613e-06	6	0.32929	0.072179	0.015966	6.1613e-06	6	0.32929	0	0.000544344
ALP	ENSG00000160948	VPS28	-0.032782	0.0040817	9.6303e-16	24	0.033163	-0.022055	0.0040532	5.2845e-08	23	0.2879	1	9.44904e-06
ALP	ENSG00000160949	TONSL	-0.053987	0.007918	9.2118e-12	6	0.11223	-0.053987	0.007918	9.2118e-12	6	0.11223	0	3.90626e-09
ALP	ENSG00000160959	LRRC14	-0.025287	0.0048317	1.6626e-07	19	0.32767	-0.025287	0.0048317	1.6626e-07	19	0.32767	0	2.55127e-05
ALP	ENSG00000160972	PPP1R16A	-0.029288	0.0074591	8.62e-05	21	1.5335e-06	-0.032704	0.0043886	9.1856e-14	18	0.37672	3	5.38907e-11
ALP	ENSG00000161011	SQSTM1	-0.028723	0.0092767	0.0019599	8	0.77785	-0.028723	0.0092767	0.0019599	8	0.77785	0	0.0456711
ALP	ENSG00000161016	RPL8	0.020592	0.0089574	0.021511	20	1.8874e-15	0.013429	0.0043534	0.0020371	17	0.10671	3	0.0468461
ALP	ENSG00000161395	PGAP3	0.085534	0.010461	2.9163e-16	15	0.0017186	0.092467	0.0083823	2.7051e-28	12	0.13835	3	7.38644e-25
ALP	ENSG00000161929	SCIMP	0.021406	0.0062794	0.00065197	16	0.21108	0.021406	0.0062794	0.00065197	16	0.21108	0	0.0211322
ALP	ENSG00000161944	ASGR2	0.056529	0.018584	0.0023519	30	0	0.033662	0.0094218	0.00035316	12	0.09801	18	0.0134756
ALP	ENSG00000162551	ALPL	0.48109	0.1418	0.00069172	3	0.00087375	0.48109	0.1418	0.00069172	3	0.00087375	0	0.0220392
ALP	ENSG00000162877	PM20D1	0.034876	0.010607	0.0010088	11	0.0014201	0.0388	0.0066133	4.4361e-09	10	0.35173	1	1.04356e-06
ALP	ENSG00000162946	DISC1	-0.017918	0.0053556	0.00082093	20	0.90963	-0.017918	0.0053556	0.00082093	20	0.90963	0	0.0248602
ALP	ENSG00000163257	DCAF16	-0.044378	0.013125	0.00072166	6	0.94776	-0.044378	0.013125	0.00072166	6	0.94776	0	0.0227133
ALP	ENSG00000163464	CXCR1	-0.027495	0.0077208	0.0003693	9	0.20684	-0.027495	0.0077208	0.0003693	9	0.20684	0	0.0139296
ALP	ENSG00000163596	ICA1L	-0.05254	0.019361	0.0066546	13	1.4797e-06	-0.070724	0.010827	6.4883e-11	12	0.068413	1	2.3203e-08
ALP	ENSG00000163617	KIAA1407	0.04106	0.013396	0.0021756	5	0.38917	0.04106	0.013396	0.0021756	5	0.38917	0	0.0488943
ALP	ENSG00000163754	GYG1	0.024758	0.0075854	0.0010987	5	0.78159	0.024758	0.0075854	0.0010987	5	0.78159	0	0.0307302
ALP	ENSG00000163818	LZTFL1	-0.043087	0.013302	0.0011985	3	0.73564	-0.043087	0.013302	0.0011985	3	0.73564	0	0.0326766
ALP	ENSG00000163823	CCR1	0.013132	0.0037121	0.00040379	31	0.15492	0.013132	0.0037121	0.00040379	31	0.15492	0	0.0148846
ALP	ENSG00000163832	ELP6	-0.02411	0.055579	0.66443	4	0.001864	-0.055612	0.017386	0.0013808	3	0.84386	1	0.0359684
ALP	ENSG00000163872	YEATS2	0.034068	0.0085813	7.1877e-05	7	0.75408	0.034068	0.0085813	7.1877e-05	7	0.75408	0	0.00397884
ALP	ENSG00000164010	ERMAP	-0.014083	0.0040541	0.0005133	23	0.19603	-0.014083	0.0040541	0.0005133	23	0.19603	0	0.017776
ALP	ENSG00000164576	SAP30L	0.042081	0.01357	0.0019279	6	0.5242	0.042081	0.01357	0.0019279	6	0.5242	0	0.0451738
ALP	ENSG00000164597	COG5	0.01838	0.002907	2.5709e-10	39	0.22332	0.01838	0.002907	2.5709e-10	39	0.22332	0	8.09418e-08
ALP	ENSG00000164674	SYTL3	-0.048023	0.018051	0.0078046	9	0.00083441	-0.041915	0.012272	0.00063665	8	0.13285	1	0.0207577
ALP	ENSG00000164707	SLC13A4	-0.020009	0.017458	0.25175	9	0.00073508	-0.037244	0.011181	0.00086511	7	0.21016	2	0.0258471
ALP	ENSG00000164733	CTSB	-0.015643	0.009353	0.094427	28	0	-0.022679	0.004777	2.0599e-06	17	0.060429	11	0.000218137
ALP	ENSG00000164849	GPR146	0.015394	0.006513	0.018099	13	0.016528	0.017605	0.0054044	0.0011236	12	0.1602	1	0.0312172
ALP	ENSG00000164850	GPER	0.037205	0.011141	0.00083885	8	0.035892	0.040287	0.010259	8.6096e-05	7	0.13065	1	0.00458859
ALP	ENSG00000164867	NOS3	0.030362	0.0097133	0.0017734	8	0.7597	0.030362	0.0097133	0.0017734	8	0.7597	0	0.0427457
ALP	ENSG00000164938	TP53INP1	0.033431	0.010635	0.0016696	8	0.13291	0.033431	0.010635	0.0016696	8	0.13291	0	0.0410336
ALP	ENSG00000165476	REEP3	0.1586	0.09688	0.10161	5	0.00039726	0.29219	0.056675	2.5296e-07	3	0.022157	2	3.65697e-05
ALP	ENSG00000165526	RPUSD4	0.037773	0.041302	0.36043	13	0	0.032801	0.0080486	4.5945e-05	6	0.13957	7	0.00279953
ALP	ENSG00000165655	ZNF503	-0.01661	0.0042847	0.0001059	23	0.60269	-0.01661	0.0042847	0.0001059	23	0.60269	0	0.0053754
ALP	ENSG00000165861	ZFYVE1	0.16171	0.022391	5.1286e-13	3	0.82951	0.16171	0.022391	5.1286e-13	3	0.82951	0	2.63807e-10
ALP	ENSG00000166135	HIF1AN	-0.039281	0.011022	0.00036535	12	0.023699	-0.050548	0.0085597	3.5188e-09	11	0.19445	1	8.48958e-07
ALP	ENSG00000166169	POLL	-0.042679	0.053496	0.42499	4	0.030424	-0.13773	0.028216	1.0549e-06	3	0.49123	1	0.000124228
ALP	ENSG00000166479	TMX3	0.025494	0.016183	0.11518	4	0.035737	0.029059	0.0093193	0.0018197	3	0.56578	1	0.0434791
ALP	ENSG00000166507	NDST2	0.023754	0.0073669	0.0012625	8	0.69745	0.023754	0.0073669	0.0012625	8	0.69745	0	0.0338652
ALP	ENSG00000166582	CENPV	0.015964	0.0044664	0.00035112	22	0.55212	0.015964	0.0044664	0.00035112	22	0.55212	0	0.0134213
ALP	ENSG00000166716	ZNF592	-0.036993	0.0092922	6.8585e-05	7	0.38935	-0.036993	0.0092922	6.8585e-05	7	0.38935	0	0.00383218
ALP	ENSG00000166780	C16orf45	0.041747	0.011086	0.00016602	6	0.50868	0.041747	0.011086	0.00016602	6	0.50868	0	0.0076368
ALP	ENSG00000166888	STAT6	0.012588	0.0042846	0.0033044	35	0.0017386	0.01267	0.0037498	0.00072749	32	0.09984	3	0.0228279
ALP	ENSG00000166971	AKTIP	-0.033966	0.0063186	7.6336e-08	14	0.031406	-0.035253	0.0059289	2.749e-09	13	0.081885	1	6.81234e-07
ALP	ENSG00000166997	CNPY4	0.020932	0.0085081	0.013885	23	0.0012015	0.039584	0.0087146	5.566e-06	20	0.14013	3	0.000502384
ALP	ENSG00000167491	GATAD2A	-0.048554	0.020829	0.019748	21	0	-0.058016	0.010565	3.9936e-08	14	0.25635	7	7.39892e-06
ALP	ENSG00000167523	C16orf55	0.11343	0.023106	9.1455e-07	3	0.2815	0.11343	0.023106	9.1455e-07	3	0.2815	0	0.000109555
ALP	ENSG00000167578	RAB4B	0.002672	0.045146	0.9528	8	3.2859e-12	-0.044973	0.011749	0.00012925	4	0.2504	4	0.00628698
ALP	ENSG00000167608	TMC4	-0.076485	0.0092485	1.3397e-16	16	3.4134e-05	-0.087613	0.0059487	4.25e-49	12	0.070624	4	4.96689e-45
ALP	ENSG00000167702	KIFC2	0.032326	0.013634	0.017742	5	0.029635	0.027421	0.0076868	0.00036078	4	0.50548	1	0.0137
ALP	ENSG00000167711	SERPINF2	0.023081	0.007392	0.001794	8	0.069215	0.023081	0.007392	0.001794	8	0.069215	0	0.0430587
ALP	ENSG00000167840	ZNF232	-0.044615	0.011424	9.406e-05	6	0.44534	-0.044615	0.011424	9.406e-05	6	0.44534	0	0.00491268
ALP	ENSG00000168056	LTBP3	-0.027299	0.0085816	0.001467	20	0.016134	-0.029255	0.0073993	7.693e-05	19	0.15107	1	0.00418637
ALP	ENSG00000168268	NT5DC2	0.014581	0.0072705	0.044913	23	0.00064171	0.024374	0.0061613	7.6231e-05	20	0.094612	3	0.00415608
ALP	ENSG00000168803	ADAL	0.028261	0.0080943	0.00048033	8	0.21647	0.028261	0.0080943	0.00048033	8	0.21647	0	0.0169286
ALP	ENSG00000168806	LCMT2	0.03315	0.0098361	0.00075098	11	0.0069553	0.024059	0.0077135	0.0018145	10	0.17168	1	0.0433962
ALP	ENSG00000169180	XPO6	-0.0523	0.016414	0.001441	5	0.036846	-0.047104	0.012915	0.00026514	4	0.21552	1	0.0108938
ALP	ENSG00000169193	CCDC126	0.040809	0.011227	0.00027814	13	0.001307	0.037836	0.0076399	7.3311e-07	12	0.26363	1	9.06061e-05
ALP	ENSG00000169504	CLIC4	-0.028182	0.0087826	0.0013327	9	0.14357	-0.028182	0.0087826	0.0013327	9	0.14357	0	0.0351421
ALP	ENSG00000169507	SLC38A11	-0.048242	0.014532	0.00090104	6	0.38646	-0.048242	0.014532	0.00090104	6	0.38646	0	0.0265794
ALP	ENSG00000169641	LUZP1	0.046096	0.020313	0.023248	7	0.0064033	0.054698	0.016862	0.0011791	6	0.077954	1	0.0323229
ALP	ENSG00000169992	NLGN2	-0.11044	0.023408	2.3799e-06	3	0.80516	-0.11044	0.023408	2.3799e-06	3	0.80516	0	0.000245095
ALP	ENSG00000170092	AC018720.10	0.016251	0.0039982	4.8089e-05	4	0.89932	0.016251	0.0039982	4.8089e-05	4	0.89932	0	0.00290215
ALP	ENSG00000170242	USP47	0.03759	0.011049	0.00066861	4	0.44601	0.03759	0.011049	0.00066861	4	0.44601	0	0.0215259
ALP	ENSG00000170390	DCLK2	-0.030854	0.0057874	9.7539e-08	20	0.30564	-0.030854	0.0057874	9.7539e-08	20	0.30564	0	1.61462e-05
ALP	ENSG00000170412	GPRC5C	0.022362	0.0049228	5.5589e-06	22	0.025765	0.021441	0.0046422	3.8597e-06	21	0.088996	1	0.000368045
ALP	ENSG00000170425	ADORA2B	0.019612	0.008188	0.016612	13	0.0052569	0.0231	0.0067478	0.00061854	11	0.12091	2	0.0203558
ALP	ENSG00000170469	SPATA24	-0.033328	0.022665	0.14145	4	0.048509	-0.04292	0.012958	0.0009257	3	0.7688	1	0.0271303
ALP	ENSG00000170633	RNF34	0.036638	0.0083798	1.2303e-05	8	0.23315	0.036638	0.0083798	1.2303e-05	8	0.23315	0	0.000962659
ALP	ENSG00000170889	RPS9	0.022983	0.015023	0.12604	7	4.4409e-16	0.01977	0.0042038	2.5671e-06	4	0.18527	3	0.000261243
ALP	ENSG00000171101	SIGLEC17P	0.042999	0.013528	0.0014801	8	0.82853	0.042999	0.013528	0.0014801	8	0.82853	0	0.0377249
ALP	ENSG00000171103	TRMT61B	-0.02837	0.0091546	0.0019419	3	0.60426	-0.02837	0.0091546	0.0019419	3	0.60426	0	0.0453892
ALP	ENSG00000171206	TRIM8	0.076787	0.025497	0.0025987	15	0	0.076442	0.0093511	2.9656e-16	11	0.36218	4	2.57875e-13
ALP	ENSG00000171444	MCC	0.024134	0.0067635	0.00035943	12	0.62162	0.024134	0.0067635	0.00035943	12	0.62162	0	0.0136596
ALP	ENSG00000172057	ORMDL3	0.021028	0.0043374	1.2476e-06	39	1.15e-08	0.017779	0.0030562	5.9764e-09	35	0.10053	4	1.35674e-06
ALP	ENSG00000172247	C1QTNF4	0.015998	0.0052379	0.0022566	28	0.0013523	0.020006	0.0044179	5.9415e-06	25	0.11271	3	0.000529835
ALP	ENSG00000172322	CLEC12A	-0.006934	0.0020175	0.00058829	50	0.67122	-0.006934	0.0020175	0.00058829	50	0.67122	0	0.0196278
ALP	ENSG00000172831	CES2	-0.089422	0.027087	0.00096259	3	0.71284	-0.089422	0.027087	0.00096259	3	0.71284	0	0.0279091
ALP	ENSG00000172922	RNASEH2C	0.028482	0.0065372	1.3195e-05	12	0.88385	0.028482	0.0065372	1.3195e-05	12	0.88385	0	0.00102043
ALP	ENSG00000172954	LCLAT1	-0.015465	0.0029475	1.548e-07	49	0.019735	-0.016356	0.0028635	1.1173e-08	48	0.051797	1	2.36895e-06
ALP	ENSG00000173085	COQ2	-0.037025	0.0078194	2.1907e-06	6	0.93186	-0.037025	0.0078194	2.1907e-06	6	0.93186	0	0.000230319
ALP	ENSG00000173145	NOC3L	-0.02609	0.0092838	0.0049504	18	0.00014636	-0.021071	0.0065812	0.0013664	16	0.14738	2	0.0357405
ALP	ENSG00000173226	IQCB1	-0.012988	0.0041311	0.0016664	30	0.011676	-0.014511	0.0035735	4.891e-05	29	0.1692	1	0.00294155
ALP	ENSG00000173281	PPP1R3B	0.14891	0.039459	0.00016072	4	0.089929	0.14891	0.039459	0.00016072	4	0.089929	0	0.00744152
ALP	ENSG00000173578	XCR1	-0.075692	0.017227	1.1135e-05	3	0.39341	-0.075692	0.017227	1.1135e-05	3	0.39341	0	0.000885496
ALP	ENSG00000173960	UBXN2A	0.022576	0.0090581	0.01269	15	0.0015706	0.02322	0.0071446	0.001154	13	0.13062	2	0.0318139
ALP	ENSG00000174136	RGMB	-0.013462	0.0038453	0.00046385	26	0.53931	-0.013462	0.0038453	0.00046385	26	0.53931	0	0.0164764
ALP	ENSG00000174137	FAM53A	-0.029335	0.0078649	0.00019163	9	0.1379	-0.029335	0.0078649	0.00019163	9	0.1379	0	0.00851148
ALP	ENSG00000175155	YPEL2	0.034943	0.010226	0.00063297	6	0.44063	0.034943	0.010226	0.00063297	6	0.44063	0	0.0206724
ALP	ENSG00000175164	ABO	0.23973	0.056406	2.1359e-05	15	0	0.037636	0.0065054	7.2347e-09	7	0.052222	8	1.61479e-06
ALP	ENSG00000175445	LPL	-0.024879	0.0066241	0.00017281	18	0.046925	-0.028258	0.0061653	4.575e-06	17	0.14274	1	0.000424812
ALP	ENSG00000175806	MSRA	-0.064986	0.015458	2.6209e-05	32	0	-0.084647	0.0073275	7.2155e-31	24	0.12554	8	2.50971e-27
ALP	ENSG00000175826	CTDNEP1	-0.073315	0.045783	0.1093	7	0	-0.09385	0.025972	0.00030206	3	0.0010859	4	0.0119909
ALP	ENSG00000176022	B3GALT6	-0.016886	0.0041735	5.2102e-05	9	0.58947	-0.016886	0.0041735	5.2102e-05	9	0.58947	0	0.0030896
ALP	ENSG00000176222	ZNF404	0.059095	0.017168	0.00057691	6	0.077617	0.059095	0.017168	0.00057691	6	0.077617	0	0.0193564
ALP	ENSG00000176783	RUFY1	0.011632	0.0050905	0.022307	25	0.042081	0.018184	0.0045384	6.1587e-05	24	0.29979	1	0.00351924
ALP	ENSG00000177200	CHD9	-0.037203	0.032175	0.24757	5	0.014281	-0.055023	0.015849	0.00051718	4	0.58171	1	0.0178716
ALP	ENSG00000177352	CCDC71	0.02403	0.05636	0.66984	4	0.047666	0.099534	0.023227	1.8246e-05	3	0.24116	1	0.00133775
ALP	ENSG00000177606	JUN	0.041309	0.009758	2.3025e-05	8	0.33254	0.041309	0.009758	2.3025e-05	8	0.33254	0	0.00161673
ALP	ENSG00000177710	SLC35G5	-0.23767	0.06556	0.00028879	3	0.083448	-0.23767	0.06556	0.00028879	3	0.083448	0	0.0116076
ALP	ENSG00000177868	CCDC23	0.0086306	0.002766	0.0018069	49	0.018666	0.009143	0.0025344	0.00030916	48	0.13796	1	0.0121969
ALP	ENSG00000178075	GRAMD1C	-0.030887	0.0058422	1.2438e-07	15	0.4334	-0.030887	0.0058422	1.2438e-07	15	0.4334	0	1.99671e-05
ALP	ENSG00000178252	WDR6	-0.015244	0.0041668	0.00025376	36	0.0023025	-0.017219	0.0036924	3.1113e-06	33	0.10432	3	0.000305864
ALP	ENSG00000178467	P4HTM	0.042234	0.0073722	1.0114e-08	13	0.17352	0.042234	0.0073722	1.0114e-08	13	0.17352	0	2.16728e-06
ALP	ENSG00000178538	CA8	0.027512	0.0085309	0.0012599	12	0.88871	0.027512	0.0085309	0.0012599	12	0.88871	0	0.0338176
ALP	ENSG00000179163	FUCA1	0.011935	0.0034165	0.00047702	26	0.30432	0.011935	0.0034165	0.00047702	26	0.30432	0	0.0168424
ALP	ENSG00000179921	GPBAR1	0.071094	0.010861	5.9121e-11	3	0.34583	0.071094	0.010861	5.9121e-11	3	0.34583	0	2.14576e-08
ALP	ENSG00000180398	MCFD2	0.02056	0.0066848	0.0021011	14	0.40835	0.02056	0.0066848	0.0021011	14	0.40835	0	0.0478396
ALP	ENSG00000180767	CHST13	-0.01152	0.0031679	0.00027652	44	0.17434	-0.01152	0.0031679	0.00027652	44	0.17434	0	0.0112428
ALP	ENSG00000181885	CLDN7	0.16327	0.074177	0.02773	8	9.9186e-08	0.13051	0.032465	5.8179e-05	3	0.33003	5	0.00335998
ALP	ENSG00000182179	UBA7	-0.010023	0.0052649	0.056951	34	4.4041e-06	-0.017425	0.0042293	3.7871e-05	29	0.10808	5	0.00239757
ALP	ENSG00000182473	EXOC7	-0.056727	0.013115	1.524e-05	4	0.42205	-0.056727	0.013115	1.524e-05	4	0.42205	0	0.00115459
ALP	ENSG00000182511	FES	-0.012379	0.0040445	0.0022078	22	0.46952	-0.012379	0.0040445	0.0022078	22	0.46952	0	0.0493613
ALP	ENSG00000183208	GDPGP1	0.054167	0.0097233	2.5359e-08	5	0.64035	0.054167	0.0097233	2.5359e-08	5	0.64035	0	4.95595e-06
ALP	ENSG00000183426	NPIP	0.009581	0.0028106	0.00065244	23	0.27655	0.009581	0.0028106	0.00065244	23	0.27655	0	0.0211451
ALP	ENSG00000183508	FAM46C	-0.087298	0.023548	0.00020954	4	0.12284	-0.087298	0.023548	0.00020954	4	0.12284	0	0.00910354
ALP	ENSG00000183625	CCR3	-0.014041	0.0048816	0.004023	32	0.00012727	-0.017687	0.0039855	9.0877e-06	28	0.10063	4	0.000748141
ALP	ENSG00000183647	ZNF530	0.11626	0.030086	0.00011145	3	0.72911	0.11626	0.030086	0.00011145	3	0.72911	0	0.00558818
ALP	ENSG00000183793	PKD1P1	-0.0098469	0.0021265	3.648e-06	24	0.63083	-0.0098469	0.0021265	3.648e-06	24	0.63083	0	0.000351268
ALP	ENSG00000184117	NIPSNAP1	0.023268	0.0075077	0.0019402	12	0.21411	0.023268	0.0075077	0.0019402	12	0.21411	0	0.0453637
ALP	ENSG00000184227	ACOT1	0.031583	0.012868	0.014108	10	0.021105	0.037753	0.011341	0.00087203	9	0.10305	1	0.0259822
ALP	ENSG00000184381	PLA2G6	0.071804	0.013421	8.7795e-08	3	0.66454	0.071804	0.013421	8.7795e-08	3	0.66454	0	1.46915e-05
ALP	ENSG00000184497	TMEM255B	0.038752	0.0073521	1.3578e-07	7	0.91678	0.038752	0.0073521	1.3578e-07	7	0.91678	0	2.14785e-05
ALP	ENSG00000184674	GSTT1	-0.010278	0.0020983	9.6772e-07	40	0.47537	-0.010278	0.0020983	9.6772e-07	40	0.47537	0	0.000115262
ALP	ENSG00000184730	APOBR	0.038704	0.010724	0.0003073	3	0.47169	0.038704	0.010724	0.0003073	3	0.47169	0	0.0121427
ALP	ENSG00000185033	SEMA4B	-0.044437	0.011264	7.9777e-05	10	0.077496	-0.044437	0.011264	7.9777e-05	10	0.077496	0	0.00431558
ALP	ENSG00000185201	IFITM2	-0.018076	0.053992	0.73778	9	3.3418e-14	-0.07446	0.0086319	6.3468e-18	6	0.46447	3	6.74307e-15
ALP	ENSG00000185591	SP1	0.069658	0.032766	0.033508	5	4.0864e-08	0.056495	0.013251	2.0128e-05	4	0.080532	1	0.00144776
ALP	ENSG00000185885	IFITM1	-0.038495	0.019422	0.047484	10	6.9816e-09	-0.05752	0.0082278	2.7301e-12	6	0.27636	4	1.2522e-09
ALP	ENSG00000186074	CD300LF	0.03278	0.010324	0.0014976	12	0.0040161	0.028866	0.006236	3.6754e-06	11	0.70584	1	0.00035347
ALP	ENSG00000186152	LILRP1	-0.02566	0.012147	0.03464	15	0	-0.019387	0.0043895	1.0022e-05	10	0.07045	5	0.000810891
ALP	ENSG00000186470	BTN3A2	-0.015332	0.0097696	0.11657	22	0	-0.02247	0.0065951	0.00065648	14	0.052062	8	0.0212346
ALP	ENSG00000186523	FAM86B1	-0.035078	0.017017	0.039263	6	3.817e-06	-0.024325	0.0071166	0.00063071	4	0.22936	2	0.0206308
ALP	ENSG00000186827	TNFRSF4	-0.044882	0.013265	0.00071557	3	0.24848	-0.044882	0.013265	0.00071557	3	0.24848	0	0.0225873
ALP	ENSG00000186891	TNFRSF18	-0.036924	0.014576	0.011305	5	0.029672	-0.033406	0.0084789	8.1508e-05	4	0.52748	1	0.00439214
ALP	ENSG00000187147	RNF220	-0.061843	0.01674	0.00022042	3	0.97973	-0.061843	0.01674	0.00022042	3	0.97973	0	0.00945948
ALP	ENSG00000187775	DNAH17	-0.096856	0.02809	0.0005646	3	0.90807	-0.096856	0.02809	0.0005646	3	0.90807	0	0.0190462
ALP	ENSG00000187796	CARD9	0.033437	0.0068914	1.2221e-06	22	1.0782e-06	0.020138	0.0042848	2.6019e-06	20	0.61097	2	0.000264141
ALP	ENSG00000187954	CYHR1	0.11284	0.035921	0.0016821	3	0.25875	0.11284	0.035921	0.0016821	3	0.25875	0	0.0412298
ALP	ENSG00000187980	PLA2G2C	0.078464	0.025599	0.0021757	3	0.94142	0.078464	0.025599	0.0021757	3	0.94142	0	0.0488943
ALP	ENSG00000187990	HIST1H2BG	-0.041547	0.018989	0.028675	7	5.3878e-07	-0.028696	0.0065858	1.3176e-05	4	0.4899	3	0.00101923
ALP	ENSG00000188315	C3orf62	0.08355	0.021772	0.00012433	6	0.030887	0.093466	0.012216	1.9945e-14	5	0.6258	1	1.31542e-11
ALP	ENSG00000188493	C19orf54	0.048638	0.019426	0.012289	11	3.3372e-08	0.063754	0.010235	4.6956e-10	9	0.097648	2	1.40134e-07
ALP	ENSG00000188707	C7orf29	-0.015917	0.0079677	0.045751	15	0.0071913	-0.027016	0.0059874	6.416e-06	13	0.33456	2	0.000563439
ALP	ENSG00000188779	SKOR1	0.046734	0.010935	1.9213e-05	3	0.81759	0.046734	0.010935	1.9213e-05	3	0.81759	0	0.00139292
ALP	ENSG00000189060	H1F0	0.011717	0.0037907	0.0019948	40	5.8638e-05	0.011014	0.0030912	0.00036667	37	0.066932	3	0.0138644
ALP	ENSG00000189077	TMEM120A	0.045945	0.022556	0.041662	7	0.010491	0.056125	0.014118	7.0283e-05	6	0.35798	1	0.00390731
ALP	ENSG00000189223	AC016683.6	0.012082	0.0054242	0.025915	24	6.5937e-07	0.014794	0.0035933	3.8376e-05	21	0.14423	3	0.00242087
ALP	ENSG00000189339	SLC35E2B	0.024505	0.01377	0.07513	5	0.0035098	0.02998	0.0059699	5.1154e-07	3	0.75609	2	6.69987e-05
ALP	ENSG00000196123	KIAA0895L	-0.11064	0.031626	0.00046826	3	0.76432	-0.11064	0.031626	0.00046826	3	0.76432	0	0.0165971
ALP	ENSG00000196683	TOMM7	0.019598	0.0062125	0.0016074	16	0.14107	0.019598	0.0062125	0.0016074	16	0.14107	0	0.0399961
ALP	ENSG00000196696	PDXDC2P	0.0050555	0.011676	0.66504	14	1.1751e-07	0.019315	0.006167	0.0017367	11	0.40913	3	0.0421859
ALP	ENSG00000196715	VKORC1L1	0.017216	0.0051421	0.00081396	21	0.039801	0.019763	0.0046119	1.8258e-05	20	0.19877	1	0.00133829
ALP	ENSG00000196821	C6orf106	-0.053072	0.010144	1.6785e-07	13	0.0032303	-0.048281	0.0071261	1.2418e-11	11	0.28351	2	5.1173e-09
ALP	ENSG00000196867	ZFP28	-0.042621	0.0064877	5.0489e-11	17	0.39952	-0.042621	0.0064877	5.0489e-11	17	0.39952	0	1.86701e-08
ALP	ENSG00000196878	LAMB3	-0.064065	0.020702	0.0019711	3	0.4013	-0.064065	0.020702	0.0019711	3	0.4013	0	0.0458662
ALP	ENSG00000196967	ZNF585A	-0.055923	0.015292	0.00025531	5	0.87326	-0.055923	0.015292	0.00025531	5	0.87326	0	0.0105976
ALP	ENSG00000196968	FUT11	0.081938	0.018099	5.9739e-06	3	0.43062	0.081938	0.018099	5.9739e-06	3	0.43062	0	0.000531646
ALP	ENSG00000197016	ZNF470	-0.037843	0.0081852	3.7765e-06	13	0.036505	-0.040695	0.0074101	3.9779e-08	12	0.12541	1	7.38388e-06
ALP	ENSG00000197102	DYNC1H1	-0.082054	0.02478	0.00092848	3	0.42355	-0.082054	0.02478	0.00092848	3	0.42355	0	0.0271845
ALP	ENSG00000197157	SND1	0.030447	0.03676	0.40752	5	6.4594e-05	0.044481	0.012865	0.00054517	4	0.68043	1	0.0185795
ALP	ENSG00000197265	GTF2E2	0.024386	0.0075607	0.0012582	10	0.41936	0.024386	0.0075607	0.0012582	10	0.41936	0	0.0337844
ALP	ENSG00000197363	ZNF517	0.040665	0.013275	0.0021897	3	0.60965	0.040665	0.013275	0.0021897	3	0.60965	0	0.0491031
ALP	ENSG00000197386	HTT	-0.088268	0.026008	0.00068925	3	0.5719	-0.088268	0.026008	0.00068925	3	0.5719	0	0.0219989
ALP	ENSG00000197586	ENTPD6	-0.0267	0.056985	0.63939	7	3.7346e-06	-0.14612	0.014792	5.1694e-23	4	0.5107	3	9.26591e-20
ALP	ENSG00000197635	DPP4	-0.023045	0.0423	0.5859	4	0.030385	-0.065938	0.020581	0.0013561	3	0.3227	1	0.0355602
ALP	ENSG00000197696	NMB	-0.02356	0.0062478	0.00016265	13	0.57003	-0.02356	0.0062478	0.00016265	13	0.57003	0	0.00751492
ALP	ENSG00000197798	FAM118B	0.078247	0.039817	0.049398	15	0	0.08742	0.012567	3.4984e-12	5	0.068604	10	1.57736e-09
ALP	ENSG00000197846	HIST1H2BF	0.046012	0.042828	0.28267	5	2.0019e-10	0.063408	0.01404	6.2956e-06	3	0.18643	2	0.0005547
ALP	ENSG00000197912	SPG7	0.041159	0.013096	0.0016727	7	0.25383	0.041159	0.013096	0.0016727	7	0.25383	0	0.041084
ALP	ENSG00000198208	RPS6KL1	-0.045395	0.011247	5.4312e-05	3	0.40861	-0.045395	0.011247	5.4312e-05	3	0.40861	0	0.00319154
ALP	ENSG00000198218	QRICH1	-0.051065	0.012819	6.7942e-05	12	0.016953	-0.056063	0.0098202	1.1369e-08	11	0.29458	1	2.40527e-06
ALP	ENSG00000198324	FAM109A	-0.14533	0.036487	6.8074e-05	3	0.12693	-0.14533	0.036487	6.8074e-05	3	0.12693	0	0.00380873
ALP	ENSG00000198355	PIM3	-0.031193	0.00697	7.6303e-06	14	0.14227	-0.031193	0.00697	7.6303e-06	14	0.14227	0	0.000649009
ALP	ENSG00000198483	ANKRD35	0.016218	0.0052744	0.0021056	4	0.57946	0.016218	0.0052744	0.0021056	4	0.57946	0	0.0478973
ALP	ENSG00000198646	NCOA6	-0.046899	0.013486	0.00050615	5	0.50957	-0.046899	0.013486	0.00050615	5	0.50957	0	0.0175903
ALP	ENSG00000198743	SLC5A3	-0.050433	0.016449	0.002169	6	0.3442	-0.050433	0.016449	0.002169	6	0.3442	0	0.0488082
ALP	ENSG00000198755	RPL10A	0.016922	0.0042284	6.2846e-05	11	0.091844	0.016922	0.0042284	6.2846e-05	11	0.091844	0	0.00357371
ALP	ENSG00000198792	TMEM184B	-0.032737	0.011609	0.0048035	12	0.002432	-0.026965	0.0084364	0.0013921	11	0.1922	1	0.0361724
ALP	ENSG00000198876	DCAF12	-0.063622	0.012311	2.3662e-07	5	0.77654	-0.063622	0.012311	2.3662e-07	5	0.77654	0	3.46359e-05
ALP	ENSG00000198890	PRMT6	-0.021182	0.0034201	5.8849e-10	30	0.82044	-0.021182	0.0034201	5.8849e-10	30	0.82044	0	1.72284e-07
ALP	ENSG00000198919	DZIP3	0.023189	0.0068334	0.00069014	23	0.027334	0.025608	0.0063318	5.2463e-05	22	0.11133	1	0.00310585
ALP	ENSG00000198945	L3MBTL3	-0.014832	0.0030422	1.0866e-06	38	0.6644	-0.014832	0.0030422	1.0866e-06	38	0.6644	0	0.000127499
ALP	ENSG00000203780	FANK1	0.040639	0.012197	0.00086276	8	0.25992	0.040639	0.012197	0.00086276	8	0.25992	0	0.0257928
ALP	ENSG00000203797	DDO	-0.023953	0.0056335	2.1194e-05	13	0.86364	-0.023953	0.0056335	2.1194e-05	13	0.86364	0	0.0015128
ALP	ENSG00000204103	MAFB	-0.12071	0.023282	2.1644e-07	6	0.011919	-0.11049	0.020221	4.6488e-08	5	0.10817	1	8.42058e-06
ALP	ENSG00000204136	GGTA1P	-0.011893	0.0091398	0.19317	9	0.039834	-0.018514	0.0060557	0.0022339	8	0.96483	1	0.0498076
ALP	ENSG00000204138	PHACTR4	0.030335	0.0083741	0.00029176	6	0.47698	0.030335	0.0083741	0.00029176	6	0.47698	0	0.01169
ALP	ENSG00000204584	RP11-304F15.3	0.017576	0.01105	0.11171	15	7.7814e-12	0.023364	0.0054381	1.7361e-05	12	0.13164	3	0.00128479
ALP	ENSG00000204650	CRHR1-IT1	-0.020468	0.0035264	6.4629e-09	24	0.028453	-0.02117	0.0032471	7.0437e-11	23	0.11206	1	2.49449e-08
ALP	ENSG00000204856	FAM216A	0.023255	0.0093333	0.012715	15	1.3498e-06	0.021027	0.0056283	0.00018697	14	0.16448	1	0.00834638
ALP	ENSG00000204920	ZNF155	0.022076	0.00577	0.00013022	11	0.50958	0.022076	0.00577	0.00013022	11	0.50958	0	0.0063221
ALP	ENSG00000205356	TECPR1	0.017111	0.00339	4.4799e-07	38	0.60226	0.017111	0.00339	4.4799e-07	38	0.60226	0	5.9685e-05
ALP	ENSG00000205531	NAP1L4	-0.036338	0.0096846	0.00017532	6	0.80372	-0.036338	0.0096846	0.00017532	6	0.80372	0	0.00796134
ALP	ENSG00000205544	TMEM256	-0.044888	0.014028	0.0013754	4	0.82337	-0.044888	0.014028	0.0013754	4	0.82337	0	0.0358731
ALP	ENSG00000205609	EIF3CL	0.010224	0.003239	0.0015961	11	0.53231	0.010224	0.003239	0.0015961	11	0.53231	0	0.0398336
ALP	ENSG00000205710	C17orf107	0.058938	0.013496	1.2597e-05	4	0.20674	0.058938	0.013496	1.2597e-05	4	0.20674	0	0.000981719
ALP	ENSG00000205873	AC130352.1	0.05411	0.013988	0.00010961	7	0.0081611	0.047826	0.011101	1.6444e-05	6	0.1016	1	0.00123002
ALP	ENSG00000205978	NYNRIN	-0.022091	0.026662	0.40736	10	6.8925e-09	-0.039738	0.011994	0.00092235	9	0.081963	1	0.0270565
ALP	ENSG00000212293	SNORA16	-0.0091409	0.0029256	0.0017813	19	0.24227	-0.0091409	0.0029256	0.0017813	19	0.24227	0	0.0428701
ALP	ENSG00000213123	TCTEX1D2	0.016917	0.0047054	0.00032407	23	0.76264	0.016917	0.0047054	0.00032407	23	0.76264	0	0.0126177
ALP	ENSG00000213672	NCKIPSD	0.037765	0.012102	0.0018045	7	0.18901	0.037765	0.012102	0.0018045	7	0.18901	0	0.0432361
ALP	ENSG00000213689	TREX1	-0.036038	0.0093232	0.00011088	11	0.0075292	-0.028235	0.0089574	0.0016205	10	0.060942	1	0.0402022
ALP	ENSG00000213859	KCTD11	0.094458	0.035927	0.0085606	6	3.7703e-06	0.12186	0.012573	3.2435e-22	3	0.34426	3	5.3239e-19
ALP	ENSG00000213903	LTB4R	-0.094318	0.049691	0.057686	4	0.00078673	-0.11316	0.024653	4.4315e-06	3	0.18242	1	0.000413659
ALP	ENSG00000214022	REPIN1	0.042215	0.012037	0.00045281	5	0.16507	0.042215	0.012037	0.00045281	5	0.16507	0	0.0161753
ALP	ENSG00000214401	KANSL1-AS1	-0.012729	0.0028186	6.3035e-06	20	0.010107	-0.013375	0.0025945	2.5363e-07	19	0.055432	1	3.66484e-05
ALP	ENSG00000214425	LRRC37A4P	0.016763	0.00271	6.1876e-10	12	0.16449	0.016763	0.00271	6.1876e-10	12	0.16449	0	1.79526e-07
ALP	ENSG00000214435	AS3MT	-0.026172	0.011662	0.024815	27	0	-0.036726	0.0058387	3.1738e-10	20	0.10511	7	9.79186e-08
ALP	ENSG00000214941	ZSWIM7	-0.0096808	0.0030547	0.001529	32	0.10641	-0.0096808	0.0030547	0.001529	32	0.10641	0	0.0385642
ALP	ENSG00000215251	FASTKD5	0.056624	0.017089	0.00092141	4	0.1906	0.056624	0.017089	0.00092141	4	0.1906	0	0.0270344
ALP	ENSG00000215914	MMP23A	0.033241	0.0066045	4.8271e-07	3	0.75955	0.033241	0.0066045	4.8271e-07	3	0.75955	0	6.3624e-05
ALP	ENSG00000218537	AP000350.4	-0.018272	0.0027085	1.5201e-11	18	0.42612	-0.018272	0.0027085	1.5201e-11	18	0.42612	0	6.11746e-09
ALP	ENSG00000221500	SNORD100	0.027888	0.018854	0.13909	5	0.049077	0.050505	0.013599	0.00020417	4	0.24833	1	0.00893133
ALP	ENSG00000224186	CTC-203F4.1	-0.01852	0.0053273	0.00050812	8	0.91956	-0.01852	0.0053273	0.00050812	8	0.91956	0	0.017642
ALP	ENSG00000224997	AL049840.1	-0.013097	0.0039508	0.00091678	9	0.54952	-0.013097	0.0039508	0.00091678	9	0.54952	0	0.0269337
ALP	ENSG00000225151	AC103965.1	-0.01549	0.0035624	1.3728e-05	12	0.68943	-0.01549	0.0035624	1.3728e-05	12	0.68943	0	0.0010555
ALP	ENSG00000225217	HSPA7	-0.048738	0.013226	0.00022865	12	0.012261	-0.053594	0.010833	7.5259e-07	11	0.15283	1	9.2739e-05
ALP	ENSG00000225282	AP000350.6	-0.027338	0.0042071	8.132e-11	6	0.84769	-0.027338	0.0042071	8.132e-11	6	0.84769	0	2.85225e-08
ALP	ENSG00000226150	AC073343.11	-0.020802	0.0053902	0.00011373	6	0.5804	-0.020802	0.0053902	0.00011373	6	0.5804	0	0.00567717
ALP	ENSG00000226329	AC005682.6	-0.023998	0.0044443	6.6729e-08	8	0.4583	-0.023998	0.0044443	6.6729e-08	8	0.4583	0	1.16049e-05
ALP	ENSG00000226686	AC012309.5	0.011783	0.0037529	0.0016903	12	0.60301	0.011783	0.0037529	0.0016903	12	0.60301	0	0.0413787
ALP	ENSG00000226752	RP11-27I1.2	0.010464	0.0020332	2.6494e-07	57	0.026355	0.0083226	0.0019236	1.5143e-05	56	0.19034	1	0.00114888
ALP	ENSG00000226824	RP4-756H11.3	-0.010683	0.0026504	5.5576e-05	17	0.077499	-0.010683	0.0026504	5.5576e-05	17	0.077499	0	0.00324493
ALP	ENSG00000227001	NBPF2P	-0.13245	0.032593	4.8325e-05	12	0	-0.14778	0.007197	1.0943e-93	3	0.12921	9	3.19722e-89
ALP	ENSG00000228157	AC007952.5	0.013701	0.0034197	6.1625e-05	3	0.38452	0.013701	0.0034197	6.1625e-05	3	0.38452	0	0.00352072
ALP	ENSG00000228318	AP001610.5	-0.013505	0.0040853	0.00094698	6	0.74406	-0.013505	0.0040853	0.00094698	6	0.74406	0	0.0275797
ALP	ENSG00000228452	RP5-994D16.9	0.02234	0.0067704	0.00096823	6	0.15142	0.02234	0.0067704	0.00096823	6	0.15142	0	0.0280281
ALP	ENSG00000228649	AC005682.5	-0.021331	0.0038343	2.6479e-08	12	0.42832	-0.021331	0.0038343	2.6479e-08	12	0.42832	0	5.15414e-06
ALP	ENSG00000228998	RP11-697E2.7	0.026069	0.00817	0.0014189	5	0.29842	0.026069	0.00817	0.0014189	5	0.29842	0	0.0366673
ALP	ENSG00000229186	ADAM1A	0.010255	0.014755	0.48706	6	8.0789e-05	0.038977	0.0074021	1.3971e-07	3	0.10454	3	2.19812e-05
ALP	ENSG00000229515	FLT1P1	-0.02076	0.0052551	7.7975e-05	14	0.034659	-0.022354	0.0043885	3.511e-07	13	0.24133	1	4.82734e-05
ALP	ENSG00000230069	LRRC37A15P	0.022153	0.0041781	1.1441e-07	15	0.068732	0.022153	0.0041781	1.1441e-07	15	0.068732	0	1.85771e-05
ALP	ENSG00000230257	RP11-645N11.2	0.013463	0.0044031	0.0022313	8	0.78988	0.013463	0.0044031	0.0022313	8	0.78988	0	0.0497648
ALP	ENSG00000230666	CEACAM22P	0.025976	0.0083165	0.0017875	7	0.53707	0.025976	0.0083165	0.0017875	7	0.53707	0	0.0429626
ALP	ENSG00000230701	FBXW4P1	0.054509	0.016053	0.00068493	3	0.4856	0.054509	0.016053	0.00068493	3	0.4856	0	0.0218894
ALP	ENSG00000231621	AC013264.2	0.014091	0.0030322	3.3649e-06	19	0.17708	0.014091	0.0030322	3.3649e-06	19	0.17708	0	0.000327598
ALP	ENSG00000231826	AC016735.2	-0.027079	0.0059681	5.6965e-06	8	0.89608	-0.027079	0.0059681	5.6965e-06	8	0.89608	0	0.000512107
ALP	ENSG00000233609	RP11-62H7.2	0.051038	0.010816	2.3728e-06	25	0	0.054616	0.0038925	1.0074e-44	19	0.10918	6	9.19788e-41
ALP	ENSG00000233622	CYP2T2P	0.015719	0.0052186	0.002594	20	3.7085e-12	0.015561	0.0025494	1.0368e-09	16	0.29016	4	2.8284e-07
ALP	ENSG00000233930	RP13-25N22.1	-0.023294	0.0060233	0.00011007	11	0.13447	-0.023294	0.0060233	0.00011007	11	0.13447	0	0.00553895
ALP	ENSG00000234286	AC006026.13	-0.012865	0.0029231	1.0775e-05	13	0.65689	-0.012865	0.0029231	1.0775e-05	13	0.65689	0	0.000861322
ALP	ENSG00000234327	AC012146.7	-0.010643	0.0034699	0.0021615	22	0.79888	-0.010643	0.0034699	0.0021615	22	0.79888	0	0.048695
ALP	ENSG00000234500	GS1-124K5.10	0.031053	0.0081416	0.00013664	3	0.71794	0.031053	0.0081416	0.00013664	3	0.71794	0	0.00656722
ALP	ENSG00000234608	MAPKAPK5-AS1	-0.053791	0.012917	3.1229e-05	12	4.3496e-05	-0.073266	0.0090216	4.6144e-16	8	0.10059	4	3.8965e-13
ALP	ENSG00000234678	RP11-465N4.4	-0.010937	0.0034799	0.001673	4	0.92457	-0.010937	0.0034799	0.001673	4	0.92457	0	0.041084
ALP	ENSG00000234936	AC010883.5	0.030007	0.0061702	1.1546e-06	3	0.60733	0.030007	0.0061702	1.1546e-06	3	0.60733	0	0.000134078
ALP	ENSG00000235231	AP000351.10	-0.016268	0.0037238	1.2497e-05	19	0.049319	-0.018405	0.0032935	2.2937e-08	18	0.21352	1	4.5311e-06
ALP	ENSG00000235532	LINC00402	-0.02712	0.009373	0.0038101	7	0.049959	-0.029536	0.0079611	0.00020727	6	0.22459	1	0.00903174
ALP	ENSG00000237310	GS1-124K5.4	0.016854	0.0040838	3.6735e-05	8	0.34746	0.016854	0.0040838	3.6735e-05	8	0.34746	0	0.00233475
ALP	ENSG00000237945	LINC00649	0.015514	0.0050332	0.0020535	27	0.0045683	0.017822	0.004396	5.032e-05	26	0.08785	1	0.00300962
ALP	ENSG00000238078	RP11-295M18.2	0.014503	0.0086273	0.092753	7	0.0020624	0.01805	0.0045082	6.2351e-05	6	0.40466	1	0.00355178
ALP	ENSG00000238083	LRRC37A2	-0.016156	0.00353	4.7257e-06	21	0.0024035	-0.018759	0.0028592	5.3464e-11	18	0.1548	3	1.96238e-08
ALP	ENSG00000239697	TNFSF12	0.027853	0.010205	0.0063468	25	5.107e-15	0.033105	0.0054259	1.0524e-09	17	0.17422	8	2.86028e-07
ALP	ENSG00000240225	ZNF542	-0.11504	0.034994	0.0010112	3	0.14828	-0.11504	0.034994	0.0010112	3	0.14828	0	0.0289366
ALP	ENSG00000241288	RP11-379B18.5	-0.040422	0.012549	0.0012767	3	0.55587	-0.040422	0.012549	0.0012767	3	0.55587	0	0.0341431
ALP	ENSG00000243317	C7orf73	0.015122	0.0047572	0.0014796	15	0.086559	0.015122	0.0047572	0.0014796	15	0.086559	0	0.0377206
ALP	ENSG00000243628	RP11-18I14.7	-0.027996	0.0072744	0.00011881	14	1.0657e-09	-0.029066	0.003883	7.1218e-14	11	0.12464	3	4.27264e-11
ALP	ENSG00000248333	CDK11B	0.030956	0.0054108	1.0581e-08	3	0.82527	0.030956	0.0054108	1.0581e-08	3	0.82527	0	2.25489e-06
ALP	ENSG00000248508	RP11-521C20.4	-0.015483	0.003817	4.9834e-05	7	0.42666	-0.015483	0.003817	4.9834e-05	7	0.42666	0	0.00298483
ALP	ENSG00000248538	RP11-10A14.5	0.034696	0.0065912	1.4103e-07	35	0	0.028558	0.0029418	2.7952e-22	19	0.068465	16	4.64019e-19
ALP	ENSG00000248971	KRT8P46	0.027598	0.0045263	1.0782e-09	7	0.26795	0.027598	0.0045263	1.0782e-09	7	0.26795	0	2.92496e-07
ALP	ENSG00000249109	RP11-1026M7.2	-0.023552	0.0063765	0.00022118	4	0.28248	-0.023552	0.0063765	0.00022118	4	0.28248	0	0.00948791
ALP	ENSG00000249274	RP11-319J24.3	-0.045315	0.0043632	2.8759e-25	4	0.58726	-0.045315	0.0043632	2.8759e-25	4	0.58726	0	6.46347e-22
ALP	ENSG00000249626	RP11-496H1.1	0.014136	0.0045552	0.0019141	9	0.92316	0.014136	0.0045552	0.0019141	9	0.92316	0	0.044966
ALP	ENSG00000249849	RP11-1101H11.1	-0.017674	0.005579	0.0015351	11	0.11342	-0.017674	0.005579	0.0015351	11	0.11342	0	0.0386914
ALP	ENSG00000251267	RP1-5O6.6	-0.031701	0.0076635	3.524e-05	3	0.31671	-0.031701	0.0076635	3.524e-05	3	0.31671	0	0.00226387
ALP	ENSG00000251393	RP1-240K6.3	0.037251	0.010049	0.00020976	4	0.66974	0.037251	0.010049	0.00020976	4	0.66974	0	0.00910768
ALP	ENSG00000251661	RP11-326C3.11	0.03105	0.010491	0.0030807	18	0	0.029469	0.0052973	2.6516e-08	9	0.1697	9	5.15791e-06
ALP	ENSG00000253649	PRSS51	0.18365	0.075666	0.015216	4	0.017651	0.24172	0.038539	3.5614e-10	3	0.22256	1	1.08729e-07
ALP	ENSG00000253981	ALG1L13P	0.074704	0.020451	0.00025935	6	0.00054874	0.091766	0.014998	9.4486e-10	4	0.079177	2	2.58968e-07
ALP	ENSG00000254004	ZNF260	-0.043899	0.014219	0.0020196	3	0.6672	-0.043899	0.014219	0.0020196	3	0.6672	0	0.0465903
ALP	ENSG00000254860	TMEM9B-AS1	0.017063	0.0058788	0.0037024	15	3.602e-05	0.025146	0.0040969	8.362e-10	12	0.077718	3	2.34016e-07
ALP	ENSG00000255182	CTD-2517M22.14	-0.034027	0.005364	2.2438e-10	7	0.20899	-0.034027	0.005364	2.2438e-10	7	0.20899	0	7.13353e-08
ALP	ENSG00000255310	AF131215.2	0.054045	0.005574	3.1371e-22	25	1.2107e-05	0.054658	0.0040906	1.008e-40	23	0.098493	2	6.40233e-37
ALP	ENSG00000255328	RP11-326C3.12	-0.023258	0.0068593	0.00069701	9	8.5785e-07	-0.023715	0.003878	9.6396e-10	7	0.09805	2	2.63955e-07
ALP	ENSG00000255518	RP11-148O21.4	-0.043459	0.014271	0.0023246	12	5.4112e-13	-0.055112	0.0061056	1.772e-19	10	0.12235	2	2.18449e-16
ALP	ENSG00000255545	RP11-627G23.1	-0.035731	0.0066846	9.0283e-08	9	0.078729	-0.035731	0.0066846	9.0283e-08	9	0.078729	0	1.50538e-05
ALP	ENSG00000256574	OR13A1	0.027462	0.0087001	0.0015964	13	0.014279	0.028885	0.0078384	0.00022867	12	0.070508	1	0.00973772
ALP	ENSG00000256826	AC138744.2	0.011447	0.016099	0.47707	5	0.006988	0.025279	0.0079239	0.0014214	3	0.40805	2	0.0366962
ALP	ENSG00000256872	NOL12	-0.027657	0.008451	0.0010656	7	0.29131	-0.027657	0.008451	0.0010656	7	0.29131	0	0.0300518
ALP	ENSG00000257017	HP	-0.023986	0.0060897	8.1896e-05	42	0	-0.025864	0.0039892	8.9689e-11	26	0.10442	16	3.12702e-08
ALP	ENSG00000257176	RP11-996F15.2	-0.016428	0.0032578	4.5914e-07	19	0.50201	-0.016428	0.0032578	4.5914e-07	19	0.50201	0	6.08652e-05
ALP	ENSG00000257599	RP11-677C1.2	-0.028251	0.0088051	0.0013344	3	0.50775	-0.028251	0.0088051	0.0013344	3	0.50775	0	0.0351616
ALP	ENSG00000257605	RP11-680A11.5	0.10997	0.031094	0.00040539	3	0.14144	0.10997	0.031094	0.00040539	3	0.14144	0	0.0149266
ALP	ENSG00000257621	RP11-349A22.5	0.024988	0.0088619	0.0048065	13	0.024068	0.02234	0.0072887	0.0021768	12	0.20796	1	0.0488987
ALP	ENSG00000258376	RP4-647C14.2	0.016612	0.0062856	0.0082192	10	0.0071392	0.018593	0.004509	3.7326e-05	9	0.23843	1	0.00236871
ALP	ENSG00000260286	RP3-369A17.5	-0.09204	0.020002	4.1922e-06	5	0.0016774	-0.076504	0.013897	3.6885e-08	3	0.051618	2	6.89929e-06
ALP	ENSG00000260910	LINC00565	-0.0098098	0.0028256	0.00051705	15	0.22356	-0.0098098	0.0028256	0.00051705	15	0.22356	0	0.0178692
ALP	ENSG00000260917	RP11-57H14.4	-0.023287	0.0061933	0.00016988	5	0.69418	-0.023287	0.0061933	0.00016988	5	0.69418	0	0.00776014
ALP	ENSG00000261126	RP11-795F19.1	-0.010933	0.0034642	0.0015997	5	0.36779	-0.010933	0.0034642	0.0015997	5	0.36779	0	0.0398942
ALP	ENSG00000261338	RP11-378A13.1	-0.02064	0.0025373	4.1276e-16	19	0.53881	-0.02064	0.0025373	4.1276e-16	19	0.53881	0	3.51589e-13
ALP	ENSG00000261372	RP11-529H20.6	-0.010718	0.0037905	0.0046905	16	0.027323	-0.011561	0.0033287	0.00051422	15	0.15186	1	0.0177967
ALP	ENSG00000261575	RP11-259G18.1	-0.025797	0.0043286	2.5269e-09	4	0.20104	-0.025797	0.0043286	2.5269e-09	4	0.20104	0	6.32093e-07
ALP	ENSG00000261584	RP11-457M11.5	0.019026	0.021515	0.37652	4	0.0042818	0.033222	0.0062952	1.3101e-07	3	0.782	1	2.08709e-05
ALP	ENSG00000261783	RP11-252K23.2	-0.012656	0.0033274	0.00014261	8	0.41438	-0.012656	0.0033274	0.00014261	8	0.41438	0	0.00678274
ALP	ENSG00000261799	RP11-283I3.6	0.032369	0.015312	0.034515	6	3.133e-07	0.04246	0.010557	5.7686e-05	3	0.10265	3	0.00333613
ALP	ENSG00000262539	RP11-259G18.3	-0.040547	0.0049995	5.0543e-16	5	0.2416	-0.040547	0.0049995	5.0543e-16	5	0.2416	0	4.25566e-13
ALP	ENSG00000262557	RP11-44F14.11	-0.044257	0.0079783	2.9041e-08	3	0.22173	-0.044257	0.0079783	2.9041e-08	3	0.22173	0	5.62287e-06
ALP	ENSG00000263391	AL512428.1	0.022242	0.02578	0.38826	12	0	0.092336	0.013843	2.5546e-11	7	0.067259	5	9.96499e-09
ALP	ENSG00000263503	RP11-707O23.5	-0.016798	0.0024277	4.5348e-12	17	0.32857	-0.016798	0.0024277	4.5348e-12	17	0.32857	0	2.00747e-09
ALP	ENSG00000264070	DND1P1	-0.019967	0.0030156	3.5627e-11	13	0.33476	-0.019967	0.0030156	3.5627e-11	13	0.33476	0	1.34867e-08
ALP	ENSG00000264469	RP11-173M1.8	-0.013073	0.0038338	0.00064969	7	0.78393	-0.013073	0.0038338	0.00064969	7	0.78393	0	0.021081
ALP	ENSG00000268535	RP11-420K14.3	-0.0094842	0.0030865	0.0021203	5	0.67332	-0.0094842	0.0030865	0.0021203	5	0.67332	0	0.04811
ALP	ENSG00000269858	EGLN2	-0.041321	0.01701	0.015131	6	0.00013071	-0.033064	0.0084633	9.3544e-05	5	0.1694	1	0.00488922
ALP	ENSG00000269899	RP11-589N15.2	0.077871	0.021473	0.00028726	3	0.12104	0.077871	0.021473	0.00028726	3	0.12104	0	0.011562
ALP	ENSG00000269918	AF131215.9	0.047771	0.0071025	1.7437e-11	8	0.0017121	0.050686	0.0050219	5.9362e-24	7	0.12331	1	1.17985e-20
ALP	ENSG00000269963	RP11-73M18.9	-0.012125	0.0038416	0.0015978	7	0.26987	-0.012125	0.0038416	0.0015978	7	0.26987	0	0.039864
ALP	ENSG00000270030	RP11-326C3.13	-0.03741	0.010189	0.00024113	5	3.9379e-06	-0.039832	0.0039143	2.5335e-24	4	0.29594	1	5.28723e-21
ALT	ENSG00000003137	CYP26B1	0.0089793	0.0025861	0.00051631	31	0.62299	0.0089793	0.0025861	0.00051631	31	0.62299	0	0.01785
ALT	ENSG00000003400	CASP10	-0.098201	0.031738	0.001974	3	0.13081	-0.098201	0.031738	0.001974	3	0.13081	0	0.0459045
ALT	ENSG00000005059	CCDC109B	0.016501	0.0052554	0.0016901	7	0.48265	0.016501	0.0052554	0.0016901	7	0.48265	0	0.0413773
ALT	ENSG00000005955	GGNBP2	-0.017132	0.0044607	0.00012272	10	0.30567	-0.017132	0.0044607	0.00012272	10	0.30567	0	0.00603723
ALT	ENSG00000006453	BAIAP2L1	-0.051925	0.01399	0.00020599	4	0.94637	-0.051925	0.01399	0.00020599	4	0.94637	0	0.0089921
ALT	ENSG00000007341	ST7L	-0.021423	0.0051532	3.2218e-05	24	0.26717	-0.021423	0.0051532	3.2218e-05	24	0.26717	0	0.00211389
ALT	ENSG00000009413	REV3L	-0.071526	0.022264	0.0013151	3	0.75197	-0.071526	0.022264	0.0013151	3	0.75197	0	0.0348342
ALT	ENSG00000011021	CLCN6	-0.031831	0.0074076	1.7306e-05	10	0.18553	-0.031831	0.0074076	1.7306e-05	10	0.18553	0	0.00128202
ALT	ENSG00000011105	TSPAN9	-0.056593	0.016921	0.00082428	5	0.78275	-0.056593	0.016921	0.00082428	5	0.78275	0	0.0249306
ALT	ENSG00000014216	CAPN1	0.018723	0.0070169	0.0076241	25	6.1323e-05	0.018214	0.0055347	0.00099835	22	0.06543	3	0.0286502
ALT	ENSG00000014919	COX15	-0.038597	0.049978	0.43995	9	2.2204e-15	-0.096297	0.015715	8.9249e-10	5	0.63232	4	2.47399e-07
ALT	ENSG00000015676	NUDCD3	0.024673	0.007651	0.0012607	14	0.35151	0.024673	0.007651	0.0012607	14	0.35151	0	0.0338298
ALT	ENSG00000018280	SLC11A1	0.015778	0.004794	0.00099744	30	0.11685	0.015778	0.004794	0.00099744	30	0.11685	0	0.0286325
ALT	ENSG00000023191	RNH1	0.039959	0.015202	0.0085761	7	0.017887	0.045093	0.0091224	7.6884e-07	6	0.87816	1	9.45819e-05
ALT	ENSG00000025156	HSF2	0.022362	0.004667	1.6559e-06	25	0.50697	0.022362	0.004667	1.6559e-06	25	0.50697	0	0.000180781
ALT	ENSG00000038945	MSR1	0.015714	0.0044113	0.00036773	24	0.95292	0.015714	0.0044113	0.00036773	24	0.95292	0	0.0138973
ALT	ENSG00000041357	PSMA4	-0.052358	0.01605	0.0011059	7	0.12357	-0.052358	0.01605	0.0011059	7	0.12357	0	0.0308724
ALT	ENSG00000048649	RSF1	-0.052238	0.016797	0.0018708	3	0.75708	-0.052238	0.016797	0.0018708	3	0.75708	0	0.0442895
ALT	ENSG00000050344	NFE2L3	0.014904	0.0066607	0.025245	12	0.010157	0.020285	0.0060693	0.00083117	10	0.0888	2	0.0250915
ALT	ENSG00000050405	LIMA1	-0.032534	0.0077294	2.5629e-05	14	0.085826	-0.032534	0.0077294	2.5629e-05	14	0.085826	0	0.00175817
ALT	ENSG00000051825	MPHOSPH9	-0.081858	0.0249	0.001011	4	0.0030309	-0.073611	0.011214	5.2375e-11	3	0.32693	1	1.92969e-08
ALT	ENSG00000052749	RRP12	-0.0085935	0.0032054	0.0073411	39	0.034874	-0.0094389	0.003076	0.0021511	38	0.090175	1	0.0485656
ALT	ENSG00000055070	SZRD1	-0.092549	0.026274	0.00042759	7	0.12178	-0.092549	0.026274	0.00042759	7	0.12178	0	0.0155172
ALT	ENSG00000055950	MRPL43	0.0099626	0.0093261	0.28541	17	1.4381e-05	0.028486	0.0073965	0.00011752	12	0.11868	5	0.00582704
ALT	ENSG00000059573	ALDH18A1	0.035988	0.0095548	0.00016556	5	0.61854	0.035988	0.0095548	0.00016556	5	0.61854	0	0.00762359
ALT	ENSG00000059804	SLC2A3	-0.028122	0.0088921	0.0015634	7	0.46172	-0.028122	0.0088921	0.0015634	7	0.46172	0	0.0392253
ALT	ENSG00000060140	STYK1	0.05507	0.016762	0.0010182	5	0.57167	0.05507	0.016762	0.0010182	5	0.57167	0	0.029043
ALT	ENSG00000060642	PIGV	-0.045165	0.017691	0.01068	4	0.01228	-0.049381	0.01486	0.00089046	3	0.069571	1	0.0263542
ALT	ENSG00000064651	SLC12A2	0.077424	0.020888	0.00021005	3	0.19167	0.077424	0.020888	0.00021005	3	0.19167	0	0.00911621
ALT	ENSG00000066933	MYO9A	0.049199	0.013497	0.00026736	4	0.31867	0.049199	0.013497	0.00026736	4	0.31867	0	0.0109681
ALT	ENSG00000067141	NEO1	-0.023848	0.0093811	0.011018	17	0.00059834	-0.029133	0.0065564	8.8495e-06	15	0.24762	2	0.000733076
ALT	ENSG00000071282	LMCD1	0.03288	0.010381	0.0015386	6	0.5038	0.03288	0.010381	0.0015386	6	0.5038	0	0.0387662
ALT	ENSG00000071462	WBSCR22	-0.0082387	0.0246	0.7377	5	1.2869e-05	-0.024501	0.0071315	0.00059127	3	0.51027	2	0.0197047
ALT	ENSG00000071909	MYO3B	-0.032711	0.025432	0.19836	5	0.0062366	-0.041553	0.013232	0.0016877	4	0.44885	1	0.0413289
ALT	ENSG00000072310	SREBF1	-0.020992	0.011655	0.071684	17	2.0795e-07	-0.026199	0.0075082	0.00048411	12	0.12875	5	0.017031
ALT	ENSG00000072694	FCGR2B	0.029853	0.0049045	1.1515e-09	35	6.5626e-06	0.03387	0.0034723	1.7685e-22	34	0.19404	1	3.02165e-19
ALT	ENSG00000073737	DHRS9	0.028494	0.0055084	2.3045e-07	22	0.0068306	0.027302	0.004046	1.5005e-11	21	0.45063	1	6.06364e-09
ALT	ENSG00000074201	CLNS1A	0.023404	0.007038	0.0008832	9	0.47222	0.023404	0.007038	0.0008832	9	0.47222	0	0.0262054
ALT	ENSG00000075223	SEMA3C	0.034079	0.0099939	0.00064974	6	0.7919	0.034079	0.0099939	0.00064974	6	0.7919	0	0.021081
ALT	ENSG00000075292	ZNF638	-0.051136	0.010825	2.3119e-06	4	0.40994	-0.051136	0.010825	2.3119e-06	4	0.40994	0	0.000239633
ALT	ENSG00000075975	MKRN2	-0.028935	0.0090286	0.0013516	21	0.0011405	-0.026773	0.0073792	0.00028545	20	0.077833	1	0.0115034
ALT	ENSG00000077782	FGFR1	0.028682	0.0061427	3.0217e-06	14	0.41126	0.028682	0.0061427	3.0217e-06	14	0.41126	0	0.000298583
ALT	ENSG00000077809	GTF2I	0.031387	0.0082159	0.00013328	9	0.043428	0.038502	0.0066788	8.1748e-09	8	0.19621	1	1.79177e-06
ALT	ENSG00000079459	FDFT1	0.020734	0.0038601	7.8199e-08	51	8.1904e-07	0.019448	0.0030903	3.1128e-10	43	0.063983	8	9.6444e-08
ALT	ENSG00000080546	SESN1	-0.027923	0.005523	4.2865e-07	16	0.55329	-0.027923	0.005523	4.2865e-07	16	0.55329	0	5.75281e-05
ALT	ENSG00000082641	NFE2L1	-0.031708	0.0099161	0.0013859	4	0.51862	-0.031708	0.0099161	0.0013859	4	0.51862	0	0.0360601
ALT	ENSG00000083312	TNPO1	0.13698	0.022494	1.131e-09	3	0.40448	0.13698	0.022494	1.131e-09	3	0.40448	0	3.0625e-07
ALT	ENSG00000083814	ZNF671	-0.023994	0.0077978	0.0020912	11	0.39259	-0.023994	0.0077978	0.0020912	11	0.39259	0	0.0476968
ALT	ENSG00000084710	EFR3B	-0.025027	0.019891	0.20832	4	0.032165	-0.03441	0.0098598	0.00048315	3	0.47221	1	0.0170075
ALT	ENSG00000087191	PSMC5	0.064511	0.015368	2.6941e-05	3	0.3666	0.064511	0.015368	2.6941e-05	3	0.3666	0	0.0018331
ALT	ENSG00000087269	NOP14	0.047658	0.028811	0.098103	5	0.017304	0.061691	0.019853	0.0018878	4	0.20394	1	0.044538
ALT	ENSG00000088298	EDEM2	-0.049084	0.012322	6.7958e-05	11	0.0015545	-0.054398	0.010142	8.1518e-08	9	0.0639	2	1.38633e-05
ALT	ENSG00000090382	LYZ	0.011916	0.0026826	8.9054e-06	60	0.0007124	0.010713	0.0023294	4.2472e-06	57	0.095431	3	0.000399261
ALT	ENSG00000092036	HAUS4	-0.013321	0.0034186	9.7497e-05	30	0.054878	-0.013321	0.0034186	9.7497e-05	30	0.054878	0	0.00504797
ALT	ENSG00000093167	LRRFIP2	0.029855	0.0070597	2.348e-05	23	0.050242	0.029855	0.0070597	2.348e-05	23	0.050242	0	0.00163962
ALT	ENSG00000095485	CWF19L1	-0.092225	0.010599	3.2932e-18	27	0	-0.092169	0.0053353	7.1903e-67	18	0.10127	9	1.31299e-62
ALT	ENSG00000096996	IL12RB1	-0.037735	0.0078907	1.734e-06	17	0.0024392	-0.038849	0.0066303	4.6463e-09	14	0.1094	3	1.08254e-06
ALT	ENSG00000099308	MAST3	-0.094993	0.022834	3.1789e-05	6	0.014372	-0.11319	0.017167	4.3005e-11	4	0.16766	2	1.60881e-08
ALT	ENSG00000099785	MARCH2	0.032798	0.0068957	1.972e-06	9	0.94472	0.032798	0.0068957	1.972e-06	9	0.94472	0	0.000210508
ALT	ENSG00000099968	BCL2L13	0.022486	0.0051249	1.146e-05	17	0.47988	0.022486	0.0051249	1.146e-05	17	0.47988	0	0.00090739
ALT	ENSG00000099977	DDT	-0.01381	0.0034555	6.4293e-05	31	0.013759	-0.014697	0.0032908	7.9623e-06	29	0.061292	2	0.000672464
ALT	ENSG00000100012	SEC14L3	-0.022147	0.0068775	0.0012811	10	0.63282	-0.022147	0.0068775	0.0012811	10	0.63282	0	0.0342201
ALT	ENSG00000100154	TTC28	0.059966	0.019598	0.0022149	3	0.25977	0.059966	0.019598	0.0022149	3	0.25977	0	0.0494821
ALT	ENSG00000100219	XBP1	0.02463	0.005815	2.2794e-05	29	0.0050215	0.021772	0.0049778	1.2209e-05	27	0.14108	2	0.000957612
ALT	ENSG00000100242	SUN2	-0.022786	0.0056891	6.1964e-05	19	0.81411	-0.022786	0.0056891	6.1964e-05	19	0.81411	0	0.00353537
ALT	ENSG00000100284	TOM1	0.01082	0.0034371	0.0016432	28	0.47338	0.01082	0.0034371	0.0016432	28	0.47338	0	0.0406136
ALT	ENSG00000100347	SAMM50	0.0031883	0.021588	0.88259	24	0	-0.021212	0.0063453	0.00082922	19	0.1029	5	0.0250412
ALT	ENSG00000100441	KHNYN	-0.024123	0.006759	0.0003584	23	0.00028666	-0.017972	0.0049381	0.00027325	22	0.16763	1	0.0111393
ALT	ENSG00000100461	RBM23	0.01745	0.0050194	0.00050797	15	0.68816	0.01745	0.0050194	0.00050797	15	0.68816	0	0.0176389
ALT	ENSG00000100726	TELO2	0.036685	0.011623	0.001598	4	0.72079	0.036685	0.011623	0.001598	4	0.72079	0	0.039864
ALT	ENSG00000100883	SRP54	-0.041583	0.016514	0.011801	8	0.0012618	-0.048997	0.011478	1.9642e-05	7	0.12246	1	0.00141944
ALT	ENSG00000100889	PCK2	0.019932	0.0048182	3.5225e-05	17	0.36426	0.019932	0.0048182	3.5225e-05	17	0.36426	0	0.00226372
ALT	ENSG00000100994	PYGB	0.0085116	0.0035612	0.016844	34	0.012607	0.010222	0.0032497	0.0016584	32	0.10854	2	0.0408614
ALT	ENSG00000100997	ABHD12	0.027426	0.011591	0.01797	9	0.004923	0.033448	0.010783	0.001922	7	0.070992	2	0.0450828
ALT	ENSG00000101019	UQCC	-0.019525	0.0056435	0.00054051	25	0.010923	-0.01529	0.0041866	0.00026018	24	0.69378	1	0.0107444
ALT	ENSG00000101109	STK4	0.037216	0.011979	0.0018921	5	0.7231	0.037216	0.011979	0.0018921	5	0.7231	0	0.0446238
ALT	ENSG00000101161	PRPF6	-0.017148	0.015217	0.25979	5	0.01823	-0.025173	0.0080067	0.0016665	4	0.52711	1	0.040983
ALT	ENSG00000101460	MAP1LC3A	0.014659	0.010109	0.14701	22	8.8818e-16	0.02973	0.005923	5.1806e-07	13	0.20993	9	6.76325e-05
ALT	ENSG00000103005	USB1	0.034125	0.0095158	0.00033559	6	0.42611	0.034125	0.0095158	0.00033559	6	0.42611	0	0.0129558
ALT	ENSG00000103091	WDR59	0.052377	0.016785	0.0018056	3	0.46322	0.052377	0.016785	0.0018056	3	0.46322	0	0.0432482
ALT	ENSG00000103549	RNF40	-0.035091	0.011208	0.0017436	6	0.77071	-0.035091	0.011208	0.0017436	6	0.77071	0	0.0423042
ALT	ENSG00000103723	AP3B2	0.020162	0.0091288	0.027198	14	0.0031843	0.024334	0.0067528	0.00031381	13	0.19913	1	0.01233
ALT	ENSG00000104081	BMF	0.055429	0.011561	1.6303e-06	4	0.8484	0.055429	0.011561	1.6303e-06	4	0.8484	0	0.000178533
ALT	ENSG00000104447	TRPS1	-0.051918	0.016535	0.0016901	4	0.70799	-0.051918	0.016535	0.0016901	4	0.70799	0	0.0413773
ALT	ENSG00000104626	ERI1	0.17459	0.037238	2.7505e-06	4	0.045044	0.18742	0.032453	7.6892e-09	3	0.14503	1	1.69679e-06
ALT	ENSG00000104879	CKM	-0.047587	0.012616	0.00016203	12	0.0048569	-0.041686	0.0095799	1.3528e-05	11	0.16815	1	0.00104204
ALT	ENSG00000104936	DMPK	-0.037124	0.015581	0.017184	8	8.9347e-05	-0.030486	0.0083328	0.00025369	6	0.27984	2	0.0105465
ALT	ENSG00000104972	LILRB1	0.013388	0.0043362	0.0020184	13	0.94518	0.013388	0.0043362	0.0020184	13	0.94518	0	0.0465769
ALT	ENSG00000105248	CCDC94	-0.032669	0.0097526	0.00080871	4	0.77953	-0.032669	0.0097526	0.00080871	4	0.77953	0	0.0246075
ALT	ENSG00000105376	ICAM5	-0.049552	0.013359	0.00020794	3	0.98409	-0.049552	0.013359	0.00020794	3	0.98409	0	0.00905422
ALT	ENSG00000105607	GCDH	-0.022328	0.0067428	0.00092844	20	0.096669	-0.022328	0.0067428	0.00092844	20	0.096669	0	0.0271845
ALT	ENSG00000105677	TMEM147	-0.074275	0.016988	1.23e-05	6	0.082315	-0.074275	0.016988	1.23e-05	6	0.082315	0	0.000962659
ALT	ENSG00000105726	ATP13A1	0.061017	0.01175	2.0724e-07	17	6.4636e-10	0.064946	0.0062808	4.6254e-25	16	0.14493	1	1.03161e-21
ALT	ENSG00000105750	ZNF85	-0.020065	0.0061569	0.001118	11	0.48244	-0.020065	0.0061569	0.001118	11	0.48244	0	0.0311208
ALT	ENSG00000105875	WDR91	0.089364	0.025802	0.00053321	5	0.059928	0.089364	0.025802	0.00053321	5	0.059928	0	0.018285
ALT	ENSG00000106077	ABHD11	0.025754	0.0065969	9.462e-05	19	0.033378	0.030033	0.0064917	3.7193e-06	18	0.072377	1	0.000356987
ALT	ENSG00000106404	CLDN15	0.03518	0.013095	0.0072214	9	0.039899	0.03948	0.011519	0.00060925	8	0.15136	1	0.0201421
ALT	ENSG00000106772	PRUNE2	-0.0086383	0.0027116	0.0014443	43	0.12558	-0.0086383	0.0027116	0.0014443	43	0.12558	0	0.0370972
ALT	ENSG00000107593	PKD2L1	0.028308	0.016692	0.0899	10	2.9705e-12	0.049461	0.0090854	5.209e-08	5	0.15347	5	9.33689e-06
ALT	ENSG00000107745	MICU1	-0.032061	0.0069115	3.5043e-06	7	0.51542	-0.032061	0.0069115	3.5043e-06	7	0.51542	0	0.000338687
ALT	ENSG00000107798	LIPA	-0.012	0.0026348	5.2519e-06	49	0.1046	-0.012	0.0026348	5.2519e-06	49	0.1046	0	0.000478021
ALT	ENSG00000107957	SH3PXD2A	-0.023001	0.0069846	0.00099083	16	0.35728	-0.023001	0.0069846	0.00099083	16	0.35728	0	0.0284904
ALT	ENSG00000108262	GIT1	0.021765	0.0049352	1.0326e-05	23	0.78248	0.021765	0.0049352	1.0326e-05	23	0.78248	0	0.000832032
ALT	ENSG00000108272	DHRS11	0.033787	0.0090896	0.00020152	7	0.20719	0.033787	0.0090896	0.00020152	7	0.20719	0	0.00884986
ALT	ENSG00000108278	ZNHIT3	-0.037636	0.0088425	2.0793e-05	5	0.47567	-0.037636	0.0088425	2.0793e-05	5	0.47567	0	0.00148826
ALT	ENSG00000108384	RAD51C	-0.010724	0.0027781	0.00011335	39	0.60554	-0.010724	0.0027781	0.00011335	39	0.60554	0	0.00566401
ALT	ENSG00000108479	GALK1	0.053737	0.010157	1.2178e-07	8	0.48719	0.053737	0.010157	1.2178e-07	8	0.48719	0	1.96036e-05
ALT	ENSG00000108509	CAMTA2	0.032848	0.013746	0.016868	10	0.016979	0.037535	0.011885	0.001587	9	0.13295	1	0.0396777
ALT	ENSG00000108654	DDX5	-0.015518	0.0042833	0.00029144	12	0.42517	-0.015518	0.0042833	0.00029144	12	0.42517	0	0.0116804
ALT	ENSG00000109180	OCIAD1	-0.031968	0.010383	0.0020785	4	0.48492	-0.031968	0.010383	0.0020785	4	0.48492	0	0.0474953
ALT	ENSG00000109919	MTCH2	-0.11807	0.020187	4.9467e-09	4	0.51777	-0.11807	0.020187	4.9467e-09	4	0.51777	0	1.14614e-06
ALT	ENSG00000110025	SNX15	-0.063525	0.017645	0.00031805	3	0.25669	-0.063525	0.017645	0.00031805	3	0.25669	0	0.012443
ALT	ENSG00000110218	PANX1	0.060121	0.009691	5.511e-10	24	4.0427e-09	0.041505	0.0087418	2.0551e-06	19	0.052253	5	0.000217782
ALT	ENSG00000110651	CD81	-0.026985	0.007721	0.00047392	7	0.83295	-0.026985	0.007721	0.00047392	7	0.83295	0	0.0167633
ALT	ENSG00000111229	ARPC3	0.029866	0.0087457	0.000638	5	0.4159	0.029866	0.0087457	0.000638	5	0.4159	0	0.0207832
ALT	ENSG00000111875	ASF1A	0.0209	0.006988	0.0027813	19	0.029836	0.019313	0.0056902	0.00068865	18	0.32725	1	0.0219822
ALT	ENSG00000112624	GLTSCR1L	-0.038936	0.010399	0.00018102	7	0.59725	-0.038936	0.010399	0.00018102	7	0.59725	0	0.00814925
ALT	ENSG00000113716	HMGXB3	-0.025201	0.010418	0.015565	4	0.014811	-0.022846	0.0070704	0.0012329	3	0.18942	1	0.0333194
ALT	ENSG00000114125	RNF7	-0.037908	0.0096244	8.192e-05	5	0.51806	-0.037908	0.0096244	8.192e-05	5	0.51806	0	0.00440784
ALT	ENSG00000115762	PLEKHB2	0.033401	0.01052	0.001499	4	0.7032	0.033401	0.01052	0.001499	4	0.7032	0	0.0380705
ALT	ENSG00000116678	LEPR	0.010742	0.006101	0.078295	22	0.016203	0.02247	0.0063355	0.00039016	21	0.10007	1	0.0145362
ALT	ENSG00000116690	PRG4	0.052143	0.01376	0.00015099	5	0.29696	0.052143	0.01376	0.00015099	5	0.29696	0	0.00709583
ALT	ENSG00000117016	RIMS3	-0.025378	0.0068503	0.00021164	16	0.27645	-0.025378	0.0068503	0.00021164	16	0.27645	0	0.00916751
ALT	ENSG00000117505	DR1	0.017146	0.0047551	0.00031121	30	0.021627	0.01613	0.0043107	0.00018268	29	0.13376	1	0.00819745
ALT	ENSG00000117713	ARID1A	-0.023806	0.0069008	0.00056109	17	0.026094	-0.030845	0.0070041	1.0635e-05	16	0.054762	1	0.000852229
ALT	ENSG00000118369	USP35	-0.035886	0.0074152	1.3015e-06	9	0.69162	-0.035886	0.0074152	1.3015e-06	9	0.69162	0	0.000148191
ALT	ENSG00000118655	DCLRE1B	-0.023132	0.0075295	0.0021255	11	0.15059	-0.023132	0.0075295	0.0021255	11	0.15059	0	0.048155
ALT	ENSG00000120647	CCDC77	-0.020821	0.005163	5.5146e-05	17	0.10641	-0.020821	0.005163	5.5146e-05	17	0.10641	0	0.0032308
ALT	ENSG00000123297	TSFM	0.036441	0.01161	0.0016974	5	0.12996	0.036441	0.01161	0.0016974	5	0.12996	0	0.0415073
ALT	ENSG00000123815	ADCK4	-0.063796	0.01989	0.0013395	3	0.58065	-0.063796	0.01989	0.0013395	3	0.58065	0	0.0352419
ALT	ENSG00000124299	PEPD	-0.098106	0.035208	0.0053281	5	0.012208	-0.11854	0.026841	1.0035e-05	4	0.090437	1	0.000811718
ALT	ENSG00000124523	SIRT5	-0.025907	0.0077114	0.00078056	7	0.5538	-0.025907	0.0077114	0.00078056	7	0.5538	0	0.0240009
ALT	ENSG00000124587	PEX6	-0.010264	0.0041254	0.012846	46	3.8832e-11	-0.011954	0.0027822	1.7332e-05	43	0.066949	3	0.00128337
ALT	ENSG00000124713	GNMT	0.02726	0.0066739	4.4174e-05	15	0.0081198	0.024697	0.006116	5.3869e-05	13	0.070648	2	0.00317253
ALT	ENSG00000124942	AHNAK	0.071325	0.013001	4.1117e-08	5	0.55488	0.071325	0.013001	4.1117e-08	5	0.55488	0	7.57928e-06
ALT	ENSG00000125445	MRPS7	0.012876	0.0034298	0.00017391	24	0.35342	0.012876	0.0034298	0.00017391	24	0.35342	0	0.00791083
ALT	ENSG00000125450	NUP85	-0.011855	0.0037425	0.0015371	26	0.29737	-0.011855	0.0037425	0.0015371	26	0.29737	0	0.0387384
ALT	ENSG00000125510	OPRL1	0.01738	0.006113	0.0044677	20	0.013006	0.019081	0.005697	0.00081009	19	0.054456	1	0.0246366
ALT	ENSG00000125618	PAX8	-0.016269	0.0060193	0.0068751	22	0.018881	-0.017634	0.005729	0.002084	21	0.055512	1	0.0475764
ALT	ENSG00000125637	PSD4	0.017403	0.0047768	0.00026931	31	0.010459	0.015098	0.0043761	0.00056013	30	0.076414	1	0.0189348
ALT	ENSG00000125977	EIF2S2	0.044252	0.014262	0.0019168	10	0.0012028	0.054657	0.011404	1.6442e-06	8	0.07515	2	0.000179718
ALT	ENSG00000126522	ASL	-0.027539	0.0082128	0.00079871	11	0.27316	-0.027539	0.0082128	0.00079871	11	0.27316	0	0.0243945
ALT	ENSG00000127080	IPPK	-0.072324	0.022669	0.0014205	3	0.37659	-0.072324	0.022669	0.0014205	3	0.37659	0	0.0366826
ALT	ENSG00000127337	YEATS4	0.015747	0.0033411	2.4376e-06	42	0.037395	0.016412	0.0032102	3.1766e-07	41	0.0927	1	4.4407e-05
ALT	ENSG00000127561	SYNGR3	-0.031232	0.0085296	0.00025057	5	0.51654	-0.031232	0.0085296	0.00025057	5	0.51654	0	0.0104563
ALT	ENSG00000127838	PNKD	-0.015953	0.0048462	0.00099487	27	0.074188	-0.015953	0.0048462	0.00099487	27	0.074188	0	0.0285683
ALT	ENSG00000127957	PMS2P3	-0.019719	0.003685	8.7353e-08	8	0.3044	-0.019719	0.003685	8.7353e-08	8	0.3044	0	1.46789e-05
ALT	ENSG00000128268	MGAT3	0.031458	0.010784	0.0035337	11	0.019869	0.033655	0.0091823	0.0002471	10	0.1324	1	0.010358
ALT	ENSG00000128284	APOL3	0.082815	0.037588	0.027579	6	4.3223e-05	0.10339	0.021362	1.2988e-06	5	0.059891	1	0.000147942
ALT	ENSG00000128829	EIF2AK4	-0.054457	0.043004	0.2054	6	2.4486e-10	-0.043271	0.010597	4.441e-05	4	0.60107	2	0.00272132
ALT	ENSG00000129933	MAU2	-0.023879	0.0067244	0.00038363	21	1.5543e-10	-0.01818	0.0043094	2.4582e-05	17	0.07817	4	0.00170072
ALT	ENSG00000130475	FCHO1	-0.016603	0.0086535	0.05503	8	0.029333	-0.022003	0.0055114	6.5467e-05	7	0.7535	1	0.00368972
ALT	ENSG00000130770	ATPIF1	0.026554	0.0073465	0.00030093	11	0.67799	0.026554	0.0073465	0.00030093	11	0.67799	0	0.0119525
ALT	ENSG00000131797	CLUHP3	0.0081732	0.0023863	0.00061462	22	0.42481	0.0081732	0.0023863	0.00061462	22	0.42481	0	0.0202656
ALT	ENSG00000132142	ACACA	-0.05239	0.016704	0.0017103	7	0.11603	-0.05239	0.016704	0.0017103	7	0.11603	0	0.0417239
ALT	ENSG00000132182	NUP210	0.055655	0.0084832	5.3579e-11	8	0.86711	0.055655	0.0084832	5.3579e-11	8	0.86711	0	1.96414e-08
ALT	ENSG00000132881	RSG1	-0.093058	0.022483	3.4871e-05	10	2.9932e-08	-0.096046	0.013376	6.9482e-13	7	0.072794	3	3.48807e-10
ALT	ENSG00000132952	USPL1	0.033063	0.0078131	2.3186e-05	9	0.75125	0.033063	0.0078131	2.3186e-05	9	0.75125	0	0.00162374
ALT	ENSG00000133624	ZNF767	0.035658	0.013199	0.0069007	7	0.041735	0.03922	0.010835	0.00029492	6	0.20713	1	0.0117795
ALT	ENSG00000133794	ARNTL	-0.019798	0.0066762	0.0030226	23	0.047452	-0.018334	0.0056202	0.0011058	22	0.34875	1	0.0308724
ALT	ENSG00000134184	GSTM1	-0.0098571	0.0029577	0.00086013	44	0.024506	-0.010158	0.0028328	0.00033574	43	0.068091	1	0.0129581
ALT	ENSG00000134201	GSTM5	-0.039538	0.0085809	4.0718e-06	8	0.50485	-0.039538	0.0085809	4.0718e-06	8	0.50485	0	0.000385502
ALT	ENSG00000134222	PSRC1	-0.019847	0.0056025	0.0003964	19	0.063628	-0.019847	0.0056025	0.0003964	19	0.063628	0	0.0147049
ALT	ENSG00000134255	CEPT1	-0.054659	0.01301	2.6552e-05	10	0.17103	-0.054659	0.01301	2.6552e-05	10	0.17103	0	0.00181001
ALT	ENSG00000134545	KLRC1	0.028023	0.0046392	1.5377e-09	15	0.61299	0.028023	0.0046392	1.5377e-09	15	0.61299	0	4.02933e-07
ALT	ENSG00000134905	CARS2	0.02336	0.0063353	0.00022664	6	0.90837	0.02336	0.0063353	0.00022664	6	0.90837	0	0.00967525
ALT	ENSG00000135213	POM121C	-0.014932	0.0046653	0.0013709	11	0.12308	-0.014932	0.0046653	0.0013709	11	0.12308	0	0.0358133
ALT	ENSG00000135378	PRRG4	0.021095	0.0068271	0.0020019	9	0.68954	0.021095	0.0068271	0.0020019	9	0.68954	0	0.0463283
ALT	ENSG00000135407	AVIL	-0.018711	0.0099273	0.059455	6	0.015619	-0.021344	0.0068051	0.0017104	5	0.26518	1	0.0417239
ALT	ENSG00000135932	CAB39	0.058669	0.013539	1.468e-05	6	0.41171	0.058669	0.013539	1.468e-05	6	0.41171	0	0.00111898
ALT	ENSG00000136169	SETDB2	0.040377	0.010972	0.00023322	7	0.28001	0.040377	0.010972	0.00023322	7	0.28001	0	0.00988824
ALT	ENSG00000136271	DDX56	0.031373	0.0076537	4.1492e-05	12	0.43098	0.031373	0.0076537	4.1492e-05	12	0.43098	0	0.00257875
ALT	ENSG00000136573	BLK	-0.036675	0.006742	5.3338e-08	37	7.6192e-05	-0.034835	0.0053835	9.7535e-11	33	0.10295	4	3.35651e-08
ALT	ENSG00000136816	TOR1B	0.021156	0.0066646	0.0015018	15	0.16652	0.021156	0.0066646	0.0015018	15	0.16652	0	0.0381217
ALT	ENSG00000137161	CNPY3	-0.092258	0.017804	2.1986e-07	5	0.37261	-0.092258	0.017804	2.1986e-07	5	0.37261	0	3.24427e-05
ALT	ENSG00000137547	MRPL15	-0.059186	0.015517	0.00013664	3	0.97916	-0.059186	0.015517	0.00013664	3	0.97916	0	0.00656722
ALT	ENSG00000137757	CASP5	0.021781	0.0056586	0.00011853	18	0.42724	0.021781	0.0056586	0.00011853	18	0.42724	0	0.00586766
ALT	ENSG00000137817	PARP6	-0.054384	0.015039	0.00029908	3	0.70927	-0.054384	0.015039	0.00029908	3	0.70927	0	0.0118952
ALT	ENSG00000137942	FNBP1L	0.04646	0.009419	8.114e-07	7	0.90977	0.04646	0.009419	8.114e-07	7	0.90977	0	9.89014e-05
ALT	ENSG00000137944	CCBL2	0.023985	0.0058655	4.3283e-05	21	0.094881	0.023985	0.0058655	4.3283e-05	21	0.094881	0	0.00266624
ALT	ENSG00000139193	CD27	0.044867	0.022898	0.050062	8	0.029356	0.063225	0.014897	2.1948e-05	7	0.47894	1	0.00155682
ALT	ENSG00000139531	SUOX	0.034307	0.0073019	2.6232e-06	19	0.09628	0.034307	0.0073019	2.6232e-06	19	0.09628	0	0.000266026
ALT	ENSG00000139624	CERS5	0.012028	0.0031917	0.00016427	30	0.40122	0.012028	0.0031917	0.00016427	30	0.40122	0	0.00757732
ALT	ENSG00000140455	USP3	-0.019211	0.0050681	0.00015028	25	0.48218	-0.019211	0.0050681	0.00015028	25	0.48218	0	0.00706814
ALT	ENSG00000140836	ZFHX3	-0.035734	0.011187	0.0014021	8	0.48996	-0.035734	0.011187	0.0014021	8	0.48996	0	0.036365
ALT	ENSG00000141452	C18orf8	-0.046516	0.0086752	8.2337e-08	7	0.48515	-0.046516	0.0086752	8.2337e-08	7	0.48515	0	1.39619e-05
ALT	ENSG00000141510	TP53	0.068309	0.022016	0.0019178	3	0.989	0.068309	0.022016	0.0019178	3	0.989	0	0.0450251
ALT	ENSG00000142632	ARHGEF19	-0.011126	0.0097382	0.25323	26	5.3613e-13	-0.031978	0.0079921	6.3022e-05	18	0.17964	8	0.00358163
ALT	ENSG00000142765	SYTL1	-0.039106	0.0096555	5.1183e-05	7	0.44686	-0.039106	0.0096555	5.1183e-05	7	0.44686	0	0.00304979
ALT	ENSG00000143226	FCGR2A	-0.11336	0.03128	0.00028991	5	0.14148	-0.11336	0.03128	0.00028991	5	0.14148	0	0.0116382
ALT	ENSG00000143384	MCL1	-0.051004	0.012427	4.0584e-05	4	0.80053	-0.051004	0.012427	4.0584e-05	4	0.80053	0	0.00253364
ALT	ENSG00000143412	ANXA9	-0.11929	0.038709	0.0020585	3	0.12857	-0.11929	0.038709	0.0020585	3	0.12857	0	0.0472045
ALT	ENSG00000143801	PSEN2	0.06484	0.021978	0.003175	7	0.035093	0.076709	0.013666	1.9877e-08	6	0.46443	1	3.9859e-06
ALT	ENSG00000143951	WDPCP	0.035984	0.0090565	7.0871e-05	7	0.54466	0.035984	0.0090565	7.0871e-05	7	0.54466	0	0.00393134
ALT	ENSG00000144026	ZNF514	-0.010054	0.0031525	0.0014262	24	0.27964	-0.010054	0.0031525	0.0014262	24	0.27964	0	0.0367746
ALT	ENSG00000144118	RALB	-0.016739	0.0049313	0.00068752	26	0.82534	-0.016739	0.0049313	0.00068752	26	0.82534	0	0.0219509
ALT	ENSG00000144712	CAND2	0.0025455	0.0085525	0.76598	19	8.4478e-05	0.026487	0.0079007	0.00080073	16	0.20647	3	0.0244266
ALT	ENSG00000145020	AMT	0.012705	0.0052772	0.016061	34	0.00078475	0.015615	0.0045026	0.0005244	31	0.10321	3	0.0180528
ALT	ENSG00000145675	PIK3R1	-0.046537	0.013992	0.00088134	7	0.82164	-0.046537	0.013992	0.00088134	7	0.82164	0	0.026175
ALT	ENSG00000146223	RPL7L1	0.030131	0.0075312	6.3128e-05	4	0.79407	0.030131	0.0075312	6.3128e-05	4	0.79407	0	0.00358625
ALT	ENSG00000148426	PROSER2	0.026563	0.0082848	0.001345	8	0.87806	0.026563	0.0082848	0.001345	8	0.87806	0	0.0353384
ALT	ENSG00000148690	FRA10AC1	0.042864	0.0092288	3.4069e-06	4	0.47306	0.042864	0.0092288	3.4069e-06	4	0.47306	0	0.000331246
ALT	ENSG00000149084	HSD17B12	-0.012705	0.0037281	0.00065493	28	0.091869	-0.012705	0.0037281	0.00065493	28	0.091869	0	0.0212
ALT	ENSG00000149485	FADS1	-0.034274	0.0071786	1.8018e-06	21	0.066793	-0.034274	0.0071786	1.8018e-06	21	0.066793	0	0.000194471
ALT	ENSG00000149499	EML3	0.014857	0.0049384	0.0026252	32	0.00051917	0.014106	0.0041245	0.00062582	29	0.079144	3	0.0205293
ALT	ENSG00000150967	ABCB9	-0.058835	0.026686	0.027477	11	8.2157e-15	-0.045996	0.010766	1.9332e-05	10	0.11552	1	0.00140016
ALT	ENSG00000151247	EIF4E	-0.023693	0.0075024	0.0015884	7	0.76938	-0.023693	0.0075024	0.0015884	7	0.76938	0	0.0396957
ALT	ENSG00000151422	FER	0.064673	0.021074	0.002149	3	0.63702	0.064673	0.021074	0.002149	3	0.63702	0	0.0485302
ALT	ENSG00000151474	FRMD4A	-0.050259	0.013549	0.00020777	5	0.93949	-0.050259	0.013549	0.00020777	5	0.93949	0	0.00904952
ALT	ENSG00000153094	BCL2L11	-0.099202	0.039447	0.011908	5	0.024889	-0.11379	0.036485	0.0018161	4	0.078316	1	0.0434214
ALT	ENSG00000153208	MERTK	-0.015066	0.0053102	0.0045527	26	1.6045e-06	-0.012138	0.0038214	0.0014914	23	0.073659	3	0.0379335
ALT	ENSG00000153214	TMEM87B	-0.034743	0.012466	0.0053199	8	0.023468	-0.043624	0.0074502	4.7573e-09	7	0.62963	1	1.10576e-06
ALT	ENSG00000153879	CEBPG	-0.029218	0.073115	0.68944	4	0.047683	-0.13204	0.029645	8.4304e-06	3	0.69099	1	0.000705289
ALT	ENSG00000154319	FAM167A	0.023158	0.0053425	1.4597e-05	49	6.3394e-14	0.027376	0.0038627	1.3681e-12	39	0.087482	10	6.57431e-10
ALT	ENSG00000154328	NEIL2	0.023087	0.0074978	0.0020757	16	6.3204e-05	0.025159	0.0055476	5.7575e-06	13	0.083744	3	0.000516161
ALT	ENSG00000154370	TRIM11	0.072716	0.023541	0.0020093	3	0.85727	0.072716	0.023541	0.0020093	3	0.85727	0	0.0464591
ALT	ENSG00000154511	FAM69A	0.023842	0.0059585	6.297e-05	5	0.38494	0.023842	0.0059585	6.297e-05	5	0.38494	0	0.00358006
ALT	ENSG00000154736	ADAMTS5	-0.030386	0.02074	0.14289	6	0.024198	-0.038731	0.012055	0.0013141	5	0.81397	1	0.0348151
ALT	ENSG00000155189	AGPAT5	-0.076103	0.01922	7.5062e-05	5	0.11699	-0.076103	0.01922	7.5062e-05	5	0.11699	0	0.00410838
ALT	ENSG00000155324	GRAMD3	-0.041301	0.013098	0.0016148	6	0.73689	-0.041301	0.013098	0.0016148	6	0.73689	0	0.0401187
ALT	ENSG00000156170	NDUFAF6	0.061412	0.016569	0.0002102	6	0.18275	0.061412	0.016569	0.0002102	6	0.18275	0	0.00911996
ALT	ENSG00000156171	DRAM2	-0.014932	0.0046766	0.0014087	26	0.049914	-0.013533	0.003765	0.00032521	25	0.52129	1	0.012652
ALT	ENSG00000156502	SUPV3L1	-0.069246	0.014535	1.8963e-06	11	0.00081392	-0.0936	0.00888	5.6171e-26	8	0.22554	3	1.3452e-22
ALT	ENSG00000156510	HKDC1	-0.038791	0.007287	1.019e-07	25	0.00029269	-0.01671	0.0050655	0.00097095	24	0.20987	1	0.028079
ALT	ENSG00000156599	ZDHHC5	-0.035157	0.0071689	9.3869e-07	16	0.69607	-0.035157	0.0071689	9.3869e-07	16	0.69607	0	0.000112033
ALT	ENSG00000157107	FCHO2	-0.010673	0.005749	0.063381	33	0.00035221	-0.024878	0.0059051	2.5202e-05	31	0.057684	2	0.0017358
ALT	ENSG00000157111	TMEM171	0.024255	0.0089654	0.0068217	17	0.0065278	0.030169	0.0079635	0.00015163	15	0.075116	2	0.0071195
ALT	ENSG00000157873	TNFRSF14	0.018098	0.0053696	0.00075032	10	0.63351	0.018098	0.0053696	0.00075032	10	0.63351	0	0.0233437
ALT	ENSG00000157895	C12orf43	-0.01667	0.010049	0.097132	18	4.424e-05	-0.048435	0.010897	8.7951e-06	16	0.079412	2	0.000729364
ALT	ENSG00000158092	NCK1	0.15312	0.049043	0.0017956	3	0.13884	0.15312	0.049043	0.0017956	3	0.13884	0	0.0430935
ALT	ENSG00000158517	NCF1	0.018769	0.0066456	0.004738	13	0.035721	0.020138	0.0059899	0.00077379	12	0.14082	1	0.0238454
ALT	ENSG00000158792	SPATA2L	-0.020061	0.00518	0.00010764	19	0.55317	-0.020061	0.00518	0.00010764	19	0.55317	0	0.00544763
ALT	ENSG00000160691	SHC1	-0.035861	0.018601	0.053866	5	0.00020869	-0.041499	0.0073958	2.0092e-08	4	0.45811	1	4.02074e-06
ALT	ENSG00000160710	ADAR	-0.037318	0.011954	0.0017973	5	0.49019	-0.037318	0.011954	0.0017973	5	0.49019	0	0.0431201
ALT	ENSG00000160766	GBAP1	0.025463	0.0068952	0.0002217	28	3.1073e-11	0.037632	0.0047387	1.9985e-15	19	0.068006	9	1.50879e-12
ALT	ENSG00000160959	LRRC14	0.022257	0.014876	0.13459	19	0	0.024429	0.0064112	0.00013874	12	0.10847	7	0.00664519
ALT	ENSG00000160972	PPP1R16A	0.071084	0.027651	0.010148	21	0	0.045208	0.0058499	1.0927e-14	14	0.13688	7	7.51186e-12
ALT	ENSG00000161016	RPL8	-0.043161	0.011277	0.0001295	20	0	-0.039274	0.0044676	1.4831e-18	15	0.13729	5	1.68606e-15
ALT	ENSG00000161326	DUSP14	0.011357	0.0032825	0.00054057	23	0.32272	0.011357	0.0032825	0.00054057	23	0.32272	0	0.0184754
ALT	ENSG00000161912	ADCY10P1	0.012781	0.0034007	0.00017103	23	0.81183	0.012781	0.0034007	0.00017103	23	0.81183	0	0.00780413
ALT	ENSG00000162086	ZNF75A	0.043367	0.010454	3.3467e-05	5	0.93221	0.043367	0.010454	3.3467e-05	5	0.93221	0	0.00218017
ALT	ENSG00000162377	SELRC1	0.037643	0.0096743	9.9809e-05	7	0.75322	0.037643	0.0096743	9.9809e-05	7	0.75322	0	0.00514488
ALT	ENSG00000162702	ZNF281	0.021998	0.0069158	0.0014682	6	0.72042	0.021998	0.0069158	0.0014682	6	0.72042	0	0.0375165
ALT	ENSG00000162711	NLRP3	-0.037033	0.0084137	1.0748e-05	21	0.014516	-0.047504	0.007413	1.4727e-10	20	0.18559	1	4.87292e-08
ALT	ENSG00000162777	DENND2D	0.036257	0.010676	0.0006832	19	0.042983	0.047086	0.0084824	2.8396e-08	18	0.45194	1	5.50528e-06
ALT	ENSG00000162817	C1orf115	0.019955	0.0093095	0.032074	18	8.8704e-08	0.018603	0.0057531	0.0012225	16	0.10164	2	0.0331457
ALT	ENSG00000163016	ALMS1P	0.027351	0.0074721	0.00025187	4	0.37061	0.027351	0.0074721	0.00025187	4	0.37061	0	0.0105052
ALT	ENSG00000163050	ADCK3	0.016473	0.0032552	4.184e-07	36	0.41698	0.016473	0.0032552	4.184e-07	36	0.41698	0	5.63856e-05
ALT	ENSG00000163069	SGCB	-0.048747	0.014634	0.00086529	7	0.14812	-0.048747	0.014634	0.00086529	7	0.14812	0	0.0258476
ALT	ENSG00000163257	DCAF16	-0.075858	0.013128	7.5413e-09	6	0.77117	-0.075858	0.013128	7.5413e-09	6	0.77117	0	1.67046e-06
ALT	ENSG00000163877	SNIP1	-0.023639	0.0068568	0.00056589	10	0.98294	-0.023639	0.0068568	0.00056589	10	0.98294	0	0.0190743
ALT	ENSG00000164535	DAGLB	0.017512	0.0042576	3.9043e-05	25	0.44798	0.017512	0.0042576	3.9043e-05	25	0.44798	0	0.00245633
ALT	ENSG00000164620	RELL2	0.033554	0.0093084	0.00031256	3	0.57315	0.033554	0.0093084	0.00031256	3	0.57315	0	0.0122875
ALT	ENSG00000164938	TP53INP1	0.042867	0.01051	4.5254e-05	8	0.1492	0.042867	0.01051	4.5254e-05	8	0.1492	0	0.00276608
ALT	ENSG00000165030	NFIL3	-0.065276	0.016336	6.4461e-05	6	0.91328	-0.065276	0.016336	6.4461e-05	6	0.91328	0	0.00364356
ALT	ENSG00000165171	WBSCR27	-0.015414	0.0046019	0.0008097	21	1.2485e-07	-0.014994	0.003075	1.0823e-06	16	0.10353	5	0.000127096
ALT	ENSG00000165355	FBXO33	0.050477	0.015274	0.00095074	5	0.98568	0.050477	0.015274	0.00095074	5	0.98568	0	0.0276643
ALT	ENSG00000165410	CFL2	-0.031045	0.0086316	0.00032225	6	0.11959	-0.031045	0.0086316	0.00032225	6	0.11959	0	0.0125653
ALT	ENSG00000165879	FRAT1	-0.02606	0.0058093	7.2614e-06	14	0.32938	-0.02606	0.0058093	7.2614e-06	14	0.32938	0	0.000623806
ALT	ENSG00000166002	C11orf75	-0.022599	0.0086243	0.0087832	23	4.4409e-16	-0.020627	0.0041957	8.8265e-07	18	0.1727	5	0.000106388
ALT	ENSG00000166928	MS4A14	-0.010888	0.0041974	0.0094855	29	0.0044798	-0.0095696	0.0030765	0.0018676	28	0.60479	1	0.0442436
ALT	ENSG00000167608	TMC4	-0.017867	0.0038949	4.4928e-06	16	0.8352	-0.017867	0.0038949	4.4928e-06	16	0.8352	0	0.000418712
ALT	ENSG00000167642	SPINT2	-0.028874	0.011414	0.011417	14	0.014466	-0.033986	0.0090673	0.00017811	13	0.22185	1	0.00805763
ALT	ENSG00000167671	UBXN6	-0.045461	0.012813	0.00038803	5	0.29243	-0.045461	0.012813	0.00038803	5	0.29243	0	0.0144716
ALT	ENSG00000167720	SRR	0.015035	0.0046859	0.0013339	23	0.24718	0.015035	0.0046859	0.0013339	23	0.24718	0	0.0351548
ALT	ENSG00000167984	NLRC3	-0.011529	0.0082648	0.16303	15	0.0071435	-0.019825	0.006445	0.0020981	13	0.20974	2	0.047796
ALT	ENSG00000168118	RAB4A	-0.036533	0.011739	0.0018575	4	0.8393	-0.036533	0.011739	0.0018575	4	0.8393	0	0.0440651
ALT	ENSG00000168610	STAT3	-0.046735	0.021554	0.03014	7	0.029449	-0.070133	0.016546	2.2489e-05	6	0.25338	1	0.00158826
ALT	ENSG00000168807	SNTB2	0.039478	0.011245	0.0004472	4	0.98657	0.039478	0.011245	0.0004472	4	0.98657	0	0.0160482
ALT	ENSG00000168872	DDX19A	-0.02882	0.021932	0.18882	4	0.027742	-0.035864	0.011731	0.0022341	3	0.77781	1	0.0498082
ALT	ENSG00000169180	XPO6	-0.04115	0.017311	0.017451	5	0.020745	-0.034098	0.0095527	0.00035775	4	0.7907	1	0.0136099
ALT	ENSG00000169231	THBS3	-0.036118	0.008035	6.9532e-06	29	1.3208e-11	-0.036523	0.0044197	1.4124e-16	25	0.31057	4	1.27759e-13
ALT	ENSG00000169592	INO80E	-0.030017	0.0072856	3.788e-05	9	0.35657	-0.030017	0.0072856	3.788e-05	9	0.35657	0	0.00239762
ALT	ENSG00000169682	SPNS1	0.019476	0.0045251	1.6771e-05	22	0.2614	0.019476	0.0045251	1.6771e-05	22	0.2614	0	0.00125063
ALT	ENSG00000170049	KCNAB3	0.050338	0.013568	0.00020719	3	0.50302	0.050338	0.013568	0.00020719	3	0.50302	0	0.00903099
ALT	ENSG00000170092	AC018720.10	0.028128	0.0039991	2.0126e-12	4	0.4549	0.028128	0.0039991	2.0126e-12	4	0.4549	0	9.37833e-10
ALT	ENSG00000170191	NANP	0.022963	0.006899	0.00087342	19	0.010875	0.026297	0.0063038	3.0255e-05	17	0.079206	2	0.00200991
ALT	ENSG00000170456	DENND5B	0.02251	0.0066879	0.00076344	10	0.95284	0.02251	0.0066879	0.00076344	10	0.95284	0	0.0236276
ALT	ENSG00000170509	HSD17B13	-0.056795	0.0094182	1.6362e-09	28	1.7181e-10	-0.040792	0.0094918	1.7269e-05	23	0.054157	5	0.00128058
ALT	ENSG00000170606	HSPA4	0.021629	0.010161	0.03328	20	1.2062e-05	0.029995	0.0079628	0.00016533	18	0.053922	2	0.00761512
ALT	ENSG00000170619	COMMD5	-0.065963	0.021282	0.0019387	5	0.018483	-0.078914	0.017416	5.8703e-06	4	0.073064	1	0.000524602
ALT	ENSG00000170647	TMEM133	0.093679	0.027289	0.00059717	5	0.89659	0.093679	0.027289	0.00059717	5	0.89659	0	0.0198583
ALT	ENSG00000170802	FOXN2	0.022574	0.0051091	9.9471e-06	13	0.37222	0.022574	0.0051091	9.9471e-06	13	0.37222	0	0.00080617
ALT	ENSG00000170852	KBTBD2	0.017275	0.0045223	0.00013351	23	0.30866	0.017275	0.0045223	0.00013351	23	0.30866	0	0.00644647
ALT	ENSG00000171291	ZNF439	-0.02672	0.0086958	0.0021212	6	0.78065	-0.02672	0.0086958	0.0021212	6	0.78065	0	0.04811
ALT	ENSG00000171714	ANO5	-0.039092	0.0079523	8.8443e-07	7	0.50761	-0.039092	0.0079523	8.8443e-07	7	0.50761	0	0.000106514
ALT	ENSG00000171791	BCL2	0.14709	0.029032	4.0545e-07	3	0.56048	0.14709	0.029032	4.0545e-07	3	0.56048	0	5.48055e-05
ALT	ENSG00000171793	CTPS1	-0.016649	0.005394	0.0020254	16	0.3985	-0.016649	0.005394	0.0020254	16	0.3985	0	0.046691
ALT	ENSG00000171953	ATPAF2	0.032379	0.013335	0.015178	8	0.0018045	0.022924	0.0068735	0.00085251	6	0.83063	2	0.0255648
ALT	ENSG00000172671	ZFAND4	-0.043278	0.013119	0.0009706	3	0.54181	-0.043278	0.013119	0.0009706	3	0.54181	0	0.0280717
ALT	ENSG00000172795	DCP2	-0.019075	0.0052671	0.00029284	14	0.69728	-0.019075	0.0052671	0.00029284	14	0.69728	0	0.0117196
ALT	ENSG00000173145	NOC3L	-0.027115	0.0075219	0.00031241	18	0.023785	-0.029692	0.0066763	8.689e-06	17	0.14612	1	0.000723266
ALT	ENSG00000173171	MTX1	-0.05371	0.013385	6.0032e-05	5	0.045877	-0.061098	0.0091936	3.0185e-11	4	0.30074	1	1.16041e-08
ALT	ENSG00000174606	ANGEL2	0.020708	0.0064238	0.0012658	16	0.99909	0.020708	0.0064238	0.0012658	16	0.99909	0	0.0339199
ALT	ENSG00000174705	SH3PXD2B	0.03605	0.011024	0.0010744	7	0.155	0.03605	0.011024	0.0010744	7	0.155	0	0.030227
ALT	ENSG00000174775	HRAS	0.0308	0.0080976	0.00014261	9	0.85902	0.0308	0.0080976	0.00014261	9	0.85902	0	0.00678274
ALT	ENSG00000175164	ABO	0.001775	0.0073285	0.80862	15	3.212e-05	0.023578	0.0046774	4.6358e-07	13	0.12255	2	6.12922e-05
ALT	ENSG00000175806	MSRA	-0.039458	0.0077324	3.3435e-07	32	5.3939e-05	-0.047056	0.0058968	1.4628e-15	30	0.12421	2	1.13365e-12
ALT	ENSG00000176476	CCDC101	-0.019978	0.0039586	4.4933e-07	26	0.88748	-0.019978	0.0039586	4.4933e-07	26	0.88748	0	5.98103e-05
ALT	ENSG00000176681	LRRC37A	0.0091115	0.0025711	0.00039437	19	0.76145	0.0091115	0.0025711	0.00039437	19	0.76145	0	0.0146482
ALT	ENSG00000176871	WSB2	-0.020852	0.0063163	0.00096259	14	0.23061	-0.020852	0.0063163	0.00096259	14	0.23061	0	0.0279091
ALT	ENSG00000177311	ZBTB38	-0.034907	0.0093819	0.00019866	5	0.43222	-0.034907	0.0093819	0.00019866	5	0.43222	0	0.00875584
ALT	ENSG00000177352	CCDC71	-0.048749	0.014898	0.0010674	4	0.30812	-0.048749	0.014898	0.0010674	4	0.30812	0	0.0300851
ALT	ENSG00000177710	SLC35G5	-0.12645	0.035968	0.00043855	3	0.15703	-0.12645	0.035968	0.00043855	3	0.15703	0	0.0158109
ALT	ENSG00000178252	WDR6	-0.012111	0.0039101	0.0019518	36	0.0099483	-0.011055	0.0033945	0.0011271	35	0.16846	1	0.0312847
ALT	ENSG00000178809	TRIM73	-0.027831	0.0042539	6.0542e-11	7	0.37473	-0.027831	0.0042539	6.0542e-11	7	0.37473	0	2.19189e-08
ALT	ENSG00000179593	ALOX15B	0.061341	0.013174	3.2214e-06	6	0.61985	0.061341	0.013174	3.2214e-06	6	0.61985	0	0.000315309
ALT	ENSG00000179743	RP11-169K16.9	0.034298	0.014045	0.014606	11	8.7917e-05	0.031652	0.0098385	0.0012944	8	0.11514	3	0.0344525
ALT	ENSG00000180871	CXCR2	-0.025937	0.007674	0.00072537	5	0.40108	-0.025937	0.007674	0.00072537	5	0.40108	0	0.0227761
ALT	ENSG00000181220	ZNF746	0.037109	0.010455	0.000386	4	0.7808	0.037109	0.010455	0.000386	4	0.7808	0	0.014418
ALT	ENSG00000181240	SLC25A41	-0.030318	0.0081572	0.00020183	6	0.4951	-0.030318	0.0081572	0.00020183	6	0.4951	0	0.00885814
ALT	ENSG00000181274	FRAT2	-0.016812	0.0040842	3.8489e-05	19	0.5352	-0.016812	0.0040842	3.8489e-05	19	0.5352	0	0.0024267
ALT	ENSG00000181789	COPG1	0.070286	0.0225	0.0017848	6	0.17761	0.070286	0.0225	0.0017848	6	0.17761	0	0.0429249
ALT	ENSG00000182093	WRB	-0.017491	0.0050019	0.00047067	28	0.017517	-0.020026	0.0046276	1.5082e-05	27	0.09835	1	0.00114514
ALT	ENSG00000182196	ARL6IP4	0.087287	0.012422	2.1151e-12	3	0.66637	0.087287	0.012422	2.1151e-12	3	0.66637	0	9.82462e-10
ALT	ENSG00000182511	FES	-0.025157	0.0055863	6.6865e-06	22	0.015622	-0.026611	0.0048478	4.0363e-08	21	0.1611	1	7.4544e-06
ALT	ENSG00000182636	NDN	0.022698	0.0071114	0.0014137	12	0.25038	0.022698	0.0071114	0.0014137	12	0.25038	0	0.0365613
ALT	ENSG00000183091	NEB	0.014246	0.0046439	0.0021568	16	0.66718	0.014246	0.0046439	0.0021568	16	0.66718	0	0.0486251
ALT	ENSG00000183255	PTTG1IP	-0.019765	0.0045457	1.3735e-05	22	0.17743	-0.019765	0.0045457	1.3735e-05	22	0.17743	0	0.00105572
ALT	ENSG00000183955	SETD8	-0.027619	0.003769	2.3356e-13	9	0.40353	-0.027619	0.003769	2.3356e-13	9	0.40353	0	1.27969e-10
ALT	ENSG00000184381	PLA2G6	-0.069575	0.019156	0.00028127	3	0.18921	-0.069575	0.019156	0.00028127	3	0.18921	0	0.0113821
ALT	ENSG00000185022	MAFF	-0.13663	0.016901	6.2754e-16	3	0.57113	-0.13663	0.016901	6.2754e-16	3	0.57113	0	5.15023e-13
ALT	ENSG00000185085	INTS5	0.016314	0.0064269	0.011138	22	0.046054	0.018249	0.0055459	0.0010001	21	0.27738	1	0.0286807
ALT	ENSG00000185499	MUC1	-0.013921	0.020494	0.49695	12	0.00045313	-0.065383	0.012765	3.022e-07	10	0.45774	2	4.26746e-05
ALT	ENSG00000185591	SP1	0.025461	0.0071344	0.00035858	5	0.83351	0.025461	0.0071344	0.00035858	5	0.83351	0	0.0136361
ALT	ENSG00000185800	DMWD	-0.038542	0.0098195	8.6719e-05	6	0.3682	-0.038542	0.0098195	8.6719e-05	6	0.3682	0	0.00461354
ALT	ENSG00000185920	PTCH1	-0.030491	0.0090263	0.0007302	9	0.15486	-0.030491	0.0090263	0.0007302	9	0.15486	0	0.0228884
ALT	ENSG00000186642	PDE2A	0.060753	0.019146	0.0015083	4	0.38954	0.060753	0.019146	0.0015083	4	0.38954	0	0.0382203
ALT	ENSG00000187474	FPR3	-0.024228	0.0075556	0.0013433	17	0.37437	-0.024228	0.0075556	0.0013433	17	0.37437	0	0.0353064
ALT	ENSG00000189129	PLAC9	0.013877	0.0069563	0.046051	9	0.04967	0.015894	0.004743	0.00080479	8	0.52676	1	0.0245214
ALT	ENSG00000196187	TMEM63A	0.010792	0.0057034	0.058468	27	0.026493	0.015064	0.0047738	0.0016014	26	0.33525	1	0.0399148
ALT	ENSG00000196378	ZNF34	0.066387	0.047777	0.16468	5	4.6566e-11	0.086175	0.016755	2.7008e-07	3	0.10439	2	3.86431e-05
ALT	ENSG00000196511	TPK1	-0.019604	0.0054006	0.00028336	21	0.83651	-0.019604	0.0054006	0.00028336	21	0.83651	0	0.0114445
ALT	ENSG00000196696	PDXDC2P	-0.027546	0.0070238	8.7879e-05	14	0.046758	-0.023447	0.0067812	0.00054489	13	0.11265	1	0.018575
ALT	ENSG00000197114	ZGPAT	0.051539	0.028657	0.072102	4	0.017904	0.072666	0.011657	4.5619e-10	3	0.48795	1	1.36423e-07
ALT	ENSG00000197142	ACSL5	0.016415	0.0057437	0.0042653	23	0.0091477	0.014967	0.004827	0.0019313	22	0.16115	1	0.045221
ALT	ENSG00000197165	SULT1A2	0.015311	0.0042159	0.00028154	11	0.55787	0.015311	0.0042159	0.00028154	11	0.55787	0	0.0113867
ALT	ENSG00000197302	ZNF720	0.026862	0.0082905	0.0011948	5	0.56732	0.026862	0.0082905	0.0011948	5	0.56732	0	0.0326125
ALT	ENSG00000197353	LYPD2	0.020829	0.0075142	0.0055712	18	0.039921	0.022941	0.0067817	0.00071765	17	0.1643	1	0.0226334
ALT	ENSG00000197586	ENTPD6	0.017529	0.022026	0.42613	7	0.0027069	0.057089	0.012664	6.5446e-06	4	0.43679	3	0.000572153
ALT	ENSG00000197728	RPS26	-0.025088	0.0073697	0.00066366	18	0.003563	-0.029611	0.0064421	4.2971e-06	17	0.050763	1	0.000403433
ALT	ENSG00000197863	ZNF790	-0.09419	0.018478	3.4441e-07	3	0.84683	-0.09419	0.018478	3.4441e-07	3	0.84683	0	4.75999e-05
ALT	ENSG00000197888	UGT2B17	-0.023857	0.007606	0.0017094	16	0.052526	-0.023857	0.007606	0.0017094	16	0.052526	0	0.0417159
ALT	ENSG00000197894	ADH5	0.060558	0.013071	3.6074e-06	3	0.74143	0.060558	0.013071	3.6074e-06	3	0.74143	0	0.000347731
ALT	ENSG00000198000	NOL8	0.045089	0.01039	1.4273e-05	7	0.8534	0.045089	0.01039	1.4273e-05	7	0.8534	0	0.00109166
ALT	ENSG00000198189	HSD17B11	-0.015337	0.0076865	0.046015	25	1.4464e-12	-0.020781	0.0051328	5.1497e-05	18	0.050563	7	0.00306122
ALT	ENSG00000198218	QRICH1	-0.051648	0.014163	0.00026556	12	0.0020405	-0.047215	0.010463	6.3993e-06	11	0.15234	1	0.000562311
ALT	ENSG00000198496	NBR2	-0.029027	0.0082025	0.00040198	14	0.075249	-0.029027	0.0082025	0.00040198	14	0.075249	0	0.0148347
ALT	ENSG00000198793	MTOR	-0.050483	0.010671	2.2366e-06	4	0.42847	-0.050483	0.010671	2.2366e-06	4	0.42847	0	0.000233632
ALT	ENSG00000198890	PRMT6	-0.021401	0.0036825	6.1886e-09	30	0.28624	-0.021401	0.0036825	6.1886e-09	30	0.28624	0	1.40273e-06
ALT	ENSG00000198933	TBKBP1	-0.018681	0.0048159	0.00010491	24	0.10119	-0.018681	0.0048159	0.00010491	24	0.10119	0	0.00533627
ALT	ENSG00000198945	L3MBTL3	-0.021683	0.0040012	5.9899e-08	38	0.011782	-0.022687	0.0036807	7.1101e-10	37	0.081512	1	2.03803e-07
ALT	ENSG00000203791	METTL10	-0.035875	0.011012	0.001123	3	0.95256	-0.035875	0.011012	0.001123	3	0.95256	0	0.031215
ALT	ENSG00000203880	PCMTD2	0.021338	0.0061064	0.00047528	6	0.20048	0.021338	0.0061064	0.00047528	6	0.20048	0	0.0167992
ALT	ENSG00000204054	RP11-492E3.1	-0.023265	0.005862	7.224e-05	7	0.41476	-0.023265	0.005862	7.224e-05	7	0.41476	0	0.00399515
ALT	ENSG00000204160	ZDHHC18	0.026261	0.010356	0.011221	11	0.012925	0.021353	0.0066571	0.0013388	10	0.51769	1	0.0352362
ALT	ENSG00000204377	C1orf134	-0.037638	0.013816	0.0064433	6	5.6904e-05	-0.046796	0.0066169	1.5246e-12	4	0.19534	2	7.25476e-10
ALT	ENSG00000205352	PRR13	0.044153	0.013991	0.0016002	3	0.84041	0.044153	0.013991	0.0016002	3	0.84041	0	0.0398942
ALT	ENSG00000205581	HMGN1	0.02181	0.0056079	0.00010059	21	0.047083	0.023096	0.0054133	1.9846e-05	20	0.09404	1	0.00143114
ALT	ENSG00000205583	STAG3L1	-0.022278	0.0031303	1.1044e-12	10	0.63685	-0.022278	0.0031303	1.1044e-12	10	0.63685	0	5.36893e-10
ALT	ENSG00000205609	EIF3CL	0.012535	0.0031929	8.6376e-05	11	0.61765	0.012535	0.0031929	8.6376e-05	11	0.61765	0	0.00459959
ALT	ENSG00000205710	C17orf107	0.047988	0.009832	1.0566e-06	4	0.7237	0.047988	0.009832	1.0566e-06	4	0.7237	0	0.000124328
ALT	ENSG00000212293	SNORA16	-0.012928	0.0026113	7.388e-07	19	0.68828	-0.012928	0.0026113	7.388e-07	19	0.68828	0	9.12321e-05
ALT	ENSG00000213390	ARHGAP19	-0.020804	0.0045886	5.7896e-06	21	0.069305	-0.020804	0.0045886	5.7896e-06	21	0.069305	0	0.000518561
ALT	ENSG00000213876	RPL7AP64	0.019959	0.005022	7.0569e-05	3	0.97847	0.019959	0.005022	7.0569e-05	3	0.97847	0	0.00391831
ALT	ENSG00000213918	DNASE1	-0.03127	0.009124	0.00060979	5	0.31571	-0.03127	0.009124	0.00060979	5	0.31571	0	0.0201564
ALT	ENSG00000214530	STARD10	0.031884	0.0044306	6.1865e-13	17	0.29942	0.031884	0.0044306	6.1865e-13	17	0.29942	0	3.1326e-10
ALT	ENSG00000214872	SMTNL1	-0.027096	0.007828	0.00053739	6	0.69845	-0.027096	0.007828	0.00053739	6	0.69845	0	0.0183959
ALT	ENSG00000215533	LINC00189	-0.03629	0.013339	0.0065177	11	0.00043778	-0.043254	0.0095318	5.6818e-06	9	0.15032	2	0.000511257
ALT	ENSG00000218537	AP000350.4	-0.015889	0.0027589	8.4512e-09	18	0.36138	-0.015889	0.0027589	8.4512e-09	18	0.36138	0	1.84958e-06
ALT	ENSG00000219755	RP1-199J3.5	0.019368	0.0050177	0.00011343	6	0.64282	0.019368	0.0050177	0.00011343	6	0.64282	0	0.0056651
ALT	ENSG00000224183	SDHDP6	0.013265	0.0028339	2.8551e-06	20	0.40032	0.013265	0.0028339	2.8551e-06	20	0.40032	0	0.000285285
ALT	ENSG00000225217	HSPA7	-0.046581	0.022867	0.041645	12	6.078e-09	-0.070093	0.014805	2.1954e-06	7	0.059659	5	0.000230482
ALT	ENSG00000225282	AP000350.6	-0.016967	0.0053496	0.0015156	6	0.1812	-0.016967	0.0053496	0.0015156	6	0.1812	0	0.0383521
ALT	ENSG00000225969	LINC00035	0.021428	0.0094137	0.022828	5	0.036472	0.024529	0.0069913	0.00045055	4	0.23148	1	0.0161279
ALT	ENSG00000226167	AP4B1-AS1	-0.027895	0.0081197	0.00059147	4	0.73609	-0.027895	0.0081197	0.00059147	4	0.73609	0	0.0197091
ALT	ENSG00000226806	AC011893.3	-0.0085168	0.0027328	0.00183	9	0.35696	-0.0085168	0.0027328	0.00183	9	0.35696	0	0.0435957
ALT	ENSG00000226824	RP4-756H11.3	-0.0071342	0.0020226	0.00042005	17	0.87752	-0.0071342	0.0020226	0.00042005	17	0.87752	0	0.0153254
ALT	ENSG00000228696	ARL17B	0.010648	0.0033863	0.0016638	19	0.20562	0.010648	0.0033863	0.0016638	19	0.20562	0	0.0409496
ALT	ENSG00000228782	MRPL45P2	0.033464	0.0062838	1.0071e-07	4	0.27653	0.033464	0.0062838	1.0071e-07	4	0.27653	0	1.65958e-05
ALT	ENSG00000229186	ADAM1A	0.01015	0.0096116	0.29098	6	0.012244	0.025275	0.0063688	7.2295e-05	5	0.08503	1	0.00399743
ALT	ENSG00000229320	KRT8P12	0.024019	0.0061033	8.3068e-05	7	0.2265	0.024019	0.0061033	8.3068e-05	7	0.2265	0	0.00445975
ALT	ENSG00000230069	LRRC37A15P	0.011203	0.0031412	0.0003617	15	0.53774	0.011203	0.0031412	0.0003617	15	0.53774	0	0.0137173
ALT	ENSG00000230567	FAM203B	-0.026047	0.01153	0.023872	5	0.0022585	-0.032204	0.0060087	8.3405e-08	3	0.29553	2	1.41184e-05
ALT	ENSG00000230641	USP12-AS2	0.024702	0.0065311	0.00015546	3	0.27886	0.024702	0.0065311	0.00015546	3	0.27886	0	0.00724529
ALT	ENSG00000233184	RP11-421L21.3	0.015325	0.0036619	2.8515e-05	11	0.2608	0.015325	0.0036619	2.8515e-05	11	0.2608	0	0.00191916
ALT	ENSG00000233609	RP11-62H7.2	0.025713	0.0041248	4.5501e-10	25	0.00035447	0.024231	0.0031749	2.3103e-14	24	0.1459	1	1.5e-11
ALT	ENSG00000234389	AC007278.3	0.0062349	0.0026748	0.019754	27	0.047219	0.011693	0.002308	4.0555e-07	26	0.5514	1	5.48055e-05
ALT	ENSG00000234431	AC007283.5	-0.027111	0.0085116	0.0014464	5	0.28996	-0.027111	0.0085116	0.0014464	5	0.28996	0	0.0371333
ALT	ENSG00000234608	MAPKAPK5-AS1	-0.03382	0.012178	0.0054824	12	6.5459e-05	-0.050974	0.0090444	1.741e-08	9	0.066462	3	3.53792e-06
ALT	ENSG00000234616	JRK	0.094654	0.028063	0.00074365	3	0.37566	0.094654	0.028063	0.00074365	3	0.37566	0	0.0231955
ALT	ENSG00000235169	SMIM1	-0.007853	0.0023332	0.00076324	27	0.79489	-0.007853	0.0023332	0.00076324	27	0.79489	0	0.0236274
ALT	ENSG00000235652	RP11-545I5.3	0.018506	0.0052616	0.00043625	4	0.41264	0.018506	0.0052616	0.00043625	4	0.41264	0	0.0157551
ALT	ENSG00000236056	GAPDHP14	-0.037542	0.0079911	2.6282e-06	4	0.23143	-0.037542	0.0079911	2.6282e-06	4	0.23143	0	0.000266256
ALT	ENSG00000236088	COX10-AS1	0.024032	0.0066603	0.00030825	5	0.99119	0.024032	0.0066603	0.00030825	5	0.99119	0	0.01217
ALT	ENSG00000236144	AD000090.2	0.024548	0.0074401	0.00096886	3	0.4387	0.024548	0.0074401	0.00096886	3	0.4387	0	0.028038
ALT	ENSG00000237310	GS1-124K5.4	0.013173	0.0037549	0.00045098	8	0.94548	0.013173	0.0037549	0.00045098	8	0.94548	0	0.016137
ALT	ENSG00000237781	RP11-54A4.2	-0.063432	0.018949	0.00081524	4	0.09001	-0.063432	0.018949	0.00081524	4	0.09001	0	0.0247538
ALT	ENSG00000239213	RP11-85F14.5	0.020394	0.0040025	3.4831e-07	3	0.72154	0.020394	0.0040025	3.4831e-07	3	0.72154	0	4.8048e-05
ALT	ENSG00000240344	PPIL3	-0.007179	0.0021367	0.00077975	54	0.10026	-0.007179	0.0021367	0.00077975	54	0.10026	0	0.023981
ALT	ENSG00000240875	RP11-392A22.2	0.0087858	0.0040517	0.030124	18	0.00039622	0.01434	0.003322	1.584e-05	15	0.12049	3	0.00119216
ALT	ENSG00000244405	ETV5	-0.068547	0.013404	3.1562e-07	3	0.70655	-0.068547	0.013404	3.1562e-07	3	0.70655	0	4.41641e-05
ALT	ENSG00000244754	N4BP2L2	-0.029642	0.0052513	1.6549e-08	17	0.44401	-0.029642	0.0052513	1.6549e-08	17	0.44401	0	3.3812e-06
ALT	ENSG00000245025	RP11-875O11.1	0.031825	0.0077354	3.8849e-05	3	0.65182	0.031825	0.0077354	3.8849e-05	3	0.65182	0	0.00244518
ALT	ENSG00000245848	CEBPA	-0.086757	0.031035	0.0051828	7	0.0034686	-0.074145	0.023704	0.0017605	6	0.12392	1	0.0425588
ALT	ENSG00000245937	CTC-228N24.3	0.02059	0.0055998	0.00023602	19	0.14161	0.02059	0.0055998	0.00023602	19	0.14161	0	0.00997927
ALT	ENSG00000246174	RP11-705O3.1	0.010815	0.0024879	1.3812e-05	22	0.69554	0.010815	0.0024879	1.3812e-05	22	0.69554	0	0.00106084
ALT	ENSG00000246560	RP11-10L12.4	0.018072	0.0056264	0.0013181	19	0.097806	0.018072	0.0056264	0.0013181	19	0.097806	0	0.0348768
ALT	ENSG00000247317	RP11-273G15.2	-0.045048	0.01133	7.0057e-05	3	0.8377	-0.045048	0.01133	7.0057e-05	3	0.8377	0	0.00390026
ALT	ENSG00000248508	RP11-521C20.4	-0.037979	0.0074348	3.2512e-07	7	0.0057453	-0.040796	0.0049083	9.4429e-17	6	0.23124	1	8.78641e-14
ALT	ENSG00000248538	RP11-10A14.5	0.018698	0.0036874	3.9623e-07	35	1.5672e-09	0.013066	0.0025375	2.6159e-07	28	0.070081	7	3.75756e-05
ALT	ENSG00000248971	KRT8P46	0.01685	0.0037599	7.414e-06	7	0.60977	0.01685	0.0037599	7.414e-06	7	0.60977	0	0.000633377
ALT	ENSG00000249626	RP11-496H1.1	0.014181	0.0045562	0.0018553	9	0.5375	0.014181	0.0045562	0.0018553	9	0.5375	0	0.0440272
ALT	ENSG00000251022	THAP9-AS1	-0.012382	0.0037892	0.0010842	4	0.74558	-0.012382	0.0037892	0.0010842	4	0.74558	0	0.0304265
ALT	ENSG00000251075	HTT-AS1	0.019469	0.0038618	4.6182e-07	8	0.34296	0.019469	0.0038618	4.6182e-07	8	0.34296	0	6.11373e-05
ALT	ENSG00000251442	RP11-792D21.2	-0.010564	0.0030403	0.00051114	33	0.78875	-0.010564	0.0030403	0.00051114	33	0.78875	0	0.0177195
ALT	ENSG00000254860	TMEM9B-AS1	0.0061907	0.0045226	0.17105	15	0.0054758	0.010322	0.0029692	0.00050827	14	0.42795	1	0.0176451
ALT	ENSG00000255031	RP11-802E16.3	-0.01835	0.0056774	0.0012285	8	0.47761	-0.01835	0.0056774	0.0012285	8	0.47761	0	0.0332405
ALT	ENSG00000255046	RP11-297N6.4	-0.026905	0.009345	0.0039879	4	0.021174	-0.024452	0.0072022	0.0006862	3	0.13641	1	0.0219135
ALT	ENSG00000255052	FAM66D	-0.047766	0.010143	2.4858e-06	3	0.38411	-0.047766	0.010143	2.4858e-06	3	0.38411	0	0.000254469
ALT	ENSG00000255182	CTD-2517M22.14	0.044199	0.0071004	4.8177e-10	7	0.040488	0.041963	0.0065488	1.4772e-10	6	0.10008	1	4.87676e-08
ALT	ENSG00000255200	AP003068.18	-0.013251	0.0045473	0.0035668	11	0.021115	-0.011983	0.0035656	0.00077719	10	0.24961	1	0.0239275
ALT	ENSG00000255310	AF131215.2	0.027792	0.0044886	5.9517e-10	25	0.0018851	0.025897	0.0030312	1.3032e-17	24	0.56485	1	1.3502e-14
ALT	ENSG00000255446	CTD-2531D15.4	0.011194	0.0041659	0.0072078	11	0.040148	0.012125	0.0036546	0.00090764	10	0.15632	1	0.0267216
ALT	ENSG00000255518	RP11-148O21.4	-0.020456	0.0078109	0.008821	12	0.00020519	-0.025344	0.0047778	1.1304e-07	11	0.24158	1	1.83891e-05
ALT	ENSG00000256155	RP11-277P12.9	-0.020756	0.0048901	2.1915e-05	3	0.94059	-0.020756	0.0048901	2.1915e-05	3	0.94059	0	0.00155486
ALT	ENSG00000256269	HMBS	0.028956	0.0065793	1.0772e-05	19	0.067423	0.028956	0.0065793	1.0772e-05	19	0.067423	0	0.000861322
ALT	ENSG00000256771	ZNF253	-0.047483	0.013805	0.00058259	6	0.44013	-0.047483	0.013805	0.00058259	6	0.44013	0	0.019491
ALT	ENSG00000258790	KIAA0391	-0.021364	0.0072395	0.0031677	21	0.00026196	-0.025442	0.0053082	1.6433e-06	18	0.23392	3	0.000179687
ALT	ENSG00000258890	CEP95	0.017289	0.0047395	0.00026436	5	0.92302	0.017289	0.0047395	0.00026436	5	0.92302	0	0.0108725
ALT	ENSG00000259715	CTD-3110H11.1	0.0080407	0.0022704	0.0003977	26	0.2199	0.0080407	0.0022704	0.0003977	26	0.2199	0	0.0147296
ALT	ENSG00000260565	ERVK13-1	-0.011643	0.0033711	0.00055287	9	0.29542	-0.011643	0.0033711	0.00055287	9	0.29542	0	0.0187595
ALT	ENSG00000260910	LINC00565	-0.011276	0.0034833	0.001207	15	0.02662	-0.01017	0.002744	0.00021035	14	0.32074	1	0.00912381
ALT	ENSG00000260947	RP11-384P7.7	-0.0132	0.0070997	0.062998	5	0.029788	-0.015738	0.0048572	0.0011944	4	0.32488	1	0.0326047
ALT	ENSG00000261338	RP11-378A13.1	-0.011787	0.0027809	2.2513e-05	19	0.29292	-0.011787	0.0027809	2.2513e-05	19	0.29292	0	0.00158867
ALT	ENSG00000261349	RP3-465N24.5	0.011535	0.0029646	9.9869e-05	15	0.062637	0.011535	0.0029646	9.9869e-05	15	0.062637	0	0.00514707
ALT	ENSG00000261556	RP11-296I10.6	-0.021036	0.012598	0.094961	10	6.5861e-06	-0.026342	0.0079352	0.00090157	6	0.16759	4	0.0265884
ALT	ENSG00000261613	RP11-20I23.13	0.010484	0.0024978	2.7014e-05	15	0.35621	0.010484	0.0024978	2.7014e-05	15	0.35621	0	0.00183679
ALT	ENSG00000261731	CTD-2358C21.4	0.0086097	0.0026067	0.00095687	10	0.70124	0.0086097	0.0026067	0.00095687	10	0.70124	0	0.0278012
ALT	ENSG00000261971	RP11-473M20.7	-0.02206	0.0058591	0.00016648	5	0.41872	-0.02206	0.0058591	0.00016648	5	0.41872	0	0.00764787
ALT	ENSG00000262039	RP11-81K2.1	-0.036315	0.0089989	5.449e-05	3	0.51491	-0.036315	0.0089989	5.449e-05	3	0.51491	0	0.00320007
ALT	ENSG00000266918	RP11-798G7.8	-0.020824	0.0063766	0.001092	3	0.49731	-0.020824	0.0063766	0.001092	3	0.49731	0	0.0305979
ALT	ENSG00000267352	SH3GL1P3	-0.035384	0.012488	0.0046058	5	0.037871	-0.039907	0.011845	0.00075421	4	0.083455	1	0.0234298
ALT	ENSG00000267453	AC004791.2	0.018639	0.0036442	3.1414e-07	7	0.36388	0.018639	0.0036442	3.1414e-07	7	0.36388	0	4.40203e-05
ALT	ENSG00000268240	RP11-678G14.4	-0.010653	0.0034426	0.0019722	7	0.3183	-0.010653	0.0034426	0.0019722	7	0.3183	0	0.0458809
ALT	ENSG00000268433	RP11-420K14.2	-0.007933	0.0025159	0.0016151	8	0.84703	-0.007933	0.0025159	0.0016151	8	0.84703	0	0.0401193
ALT	ENSG00000268555	RP11-678G14.3	-0.0080007	0.0023809	0.00077824	9	0.47152	-0.0080007	0.0023809	0.00077824	9	0.47152	0	0.0239493
ALT	ENSG00000269918	AF131215.9	0.029512	0.0059176	6.1281e-07	8	0.012428	0.027997	0.0048413	7.3386e-09	7	0.11347	1	1.63424e-06
ApoA	ENSG00000002933	TMEM176A	0.0067385	0.0026427	0.010776	54	0.038372	0.0089875	0.0026271	0.00062372	53	0.11872	1	0.0204801
ApoA	ENSG00000003056	M6PR	0.030223	0.0055523	5.2267e-08	19	0.45038	0.030223	0.0055523	5.2267e-08	19	0.45038	0	9.36288e-06
ApoA	ENSG00000004534	RBM6	0.024416	0.0037783	1.0313e-10	43	2.4782e-06	0.030344	0.0030339	1.4981e-23	38	0.05905	5	2.8796e-20
ApoA	ENSG00000010327	STAB1	-0.057495	0.013427	1.8527e-05	12	7.6894e-05	-0.054912	0.0069479	2.7141e-15	10	0.5709	2	2.01776e-12
ApoA	ENSG00000023892	DEF6	-0.027087	0.0079175	0.00062364	27	1.6611e-12	-0.02587	0.004811	7.5614e-08	23	0.05689	4	1.29497e-05
ApoA	ENSG00000025434	NR1H3	-0.049805	0.010719	3.3755e-06	24	1.7764e-15	-0.042106	0.0061741	9.1239e-12	17	0.090501	7	3.87461e-09
ApoA	ENSG00000030066	NUP160	-0.10984	0.065074	0.091413	4	0.0011531	-0.14554	0.036328	6.1703e-05	3	0.062619	1	0.0035238
ApoA	ENSG00000031698	SARS	0.098713	0.028846	0.0006214	4	0.093004	0.098713	0.028846	0.0006214	4	0.093004	0	0.02042
ApoA	ENSG00000035115	SH3YL1	-0.0088362	0.0028547	0.0019661	26	0.63495	-0.0088362	0.0028547	0.0019661	26	0.63495	0	0.0457717
ApoA	ENSG00000036565	SLC18A1	0.021622	0.0095154	0.023066	15	0.0025529	0.030905	0.0074661	3.4832e-05	13	0.14408	2	0.00224556
ApoA	ENSG00000039523	FAM65A	-0.071871	0.037741	0.05687	6	4.2492e-05	-0.11121	0.026486	2.6821e-05	3	0.062291	3	0.00182664
ApoA	ENSG00000039650	PNKP	0.014488	0.0042869	0.000726	22	0.80027	0.014488	0.0042869	0.000726	22	0.80027	0	0.0227929
ApoA	ENSG00000040199	PHLPP2	-0.041211	0.0091733	7.0408e-06	11	0.1527	-0.041211	0.0091733	7.0408e-06	11	0.1527	0	0.000607893
ApoA	ENSG00000042445	RETSAT	0.026768	0.0039587	1.3616e-11	19	0.96649	0.026768	0.0039587	1.3616e-11	19	0.96649	0	5.56594e-09
ApoA	ENSG00000044115	CTNNA1	-0.0065125	0.0031141	0.036498	35	0.047578	-0.0079265	0.0025889	0.0022004	34	0.60834	1	0.0492545
ApoA	ENSG00000050405	LIMA1	0.031232	0.0065521	1.8725e-06	14	0.37309	0.031232	0.0065521	1.8725e-06	14	0.37309	0	0.000200988
ApoA	ENSG00000054967	RELT	0.032041	0.0080026	6.2337e-05	9	0.26549	0.032041	0.0080026	6.2337e-05	9	0.26549	0	0.00355168
ApoA	ENSG00000055483	USP36	0.0085687	0.0026623	0.0012887	33	0.86875	0.0085687	0.0026623	0.0012887	33	0.86875	0	0.034354
ApoA	ENSG00000057608	GDI2	-0.013734	0.0035926	0.00013201	17	0.68571	-0.013734	0.0035926	0.00013201	17	0.68571	0	0.00639307
ApoA	ENSG00000060642	PIGV	0.07527	0.015546	1.287e-06	4	0.043113	0.078619	0.010344	2.9559e-14	3	0.3047	1	1.88154e-11
ApoA	ENSG00000064651	SLC12A2	-0.11009	0.035715	0.0020527	3	0.031004	-0.11009	0.035715	0.0020527	3	0.031004	0	0.0470936
ApoA	ENSG00000064989	CALCRL	-0.046195	0.019449	0.017539	7	0.029333	-0.054042	0.015913	0.00068322	6	0.15729	1	0.021847
ApoA	ENSG00000065060	UHRF1BP1	-0.019634	0.0047735	3.9016e-05	46	0	-0.021939	0.0030067	2.9505e-13	39	0.081157	7	1.58756e-10
ApoA	ENSG00000065600	TMEM206	-0.02585	0.0082638	0.0017595	13	0.30796	-0.02585	0.0082638	0.0017595	13	0.30796	0	0.0425511
ApoA	ENSG00000065970	FOXJ2	0.0307	0.0089958	0.00064314	5	0.53181	0.0307	0.0089958	0.00064314	5	0.53181	0	0.0209157
ApoA	ENSG00000066336	SPI1	-0.010456	0.026512	0.6933	10	9.9305e-11	0.03896	0.0084104	3.6146e-06	3	0.50571	7	0.000348311
ApoA	ENSG00000068079	IFI35	0.084992	0.019854	1.8617e-05	4	0.057295	0.084992	0.019854	1.8617e-05	4	0.057295	0	0.00135813
ApoA	ENSG00000068745	IP6K2	0.021118	0.010426	0.042805	6	0.016539	0.023199	0.0060723	0.00013319	5	0.82002	1	0.00643624
ApoA	ENSG00000069275	NUCKS1	-0.028706	0.011693	0.014091	11	0.004771	-0.033671	0.010015	0.00077351	9	0.071131	2	0.0238418
ApoA	ENSG00000070214	SLC44A1	0.074861	0.067878	0.27008	5	0.0013324	0.14657	0.045884	0.0014014	3	0.1853	2	0.0363527
ApoA	ENSG00000071082	RPL31	0.022777	0.006699	0.00067385	6	0.40982	0.022777	0.006699	0.00067385	6	0.40982	0	0.0216469
ApoA	ENSG00000072163	LIMS2	0.024521	0.0076922	0.0014338	11	0.087416	0.024521	0.0076922	0.0014338	11	0.087416	0	0.0369015
ApoA	ENSG00000072694	FCGR2B	0.020195	0.0036451	3.0174e-08	35	0.099682	0.020195	0.0036451	3.0174e-08	35	0.099682	0	5.78474e-06
ApoA	ENSG00000073060	SCARB1	0.00079368	0.016131	0.96076	18	8.4377e-15	-0.032007	0.010262	0.0018146	13	0.12647	5	0.0433962
ApoA	ENSG00000073578	SDHA	0.062007	0.020213	0.0021574	3	0.35365	0.062007	0.020213	0.0021574	3	0.35365	0	0.0486289
ApoA	ENSG00000073605	GSDMB	-0.016946	0.0038483	1.0651e-05	47	6.0449e-07	-0.010507	0.0028744	0.0002569	45	0.096351	2	0.0106481
ApoA	ENSG00000073737	DHRS9	0.018944	0.0047712	7.1721e-05	22	0.1258	0.018944	0.0047712	7.1721e-05	22	0.1258	0	0.00397171
ApoA	ENSG00000074755	ZZEF1	-0.076999	0.018416	2.902e-05	3	0.45268	-0.076999	0.018416	2.902e-05	3	0.45268	0	0.00194691
ApoA	ENSG00000075975	MKRN2	-0.026198	0.0069726	0.00017175	21	0.20738	-0.026198	0.0069726	0.00017175	21	0.20738	0	0.0078272
ApoA	ENSG00000076003	MCM6	0.03767	0.0047516	2.2322e-15	26	0.96596	0.03767	0.0047516	2.2322e-15	26	0.96596	0	1.67656e-12
ApoA	ENSG00000077254	USP33	0.082504	0.024217	0.00065723	3	0.8799	0.082504	0.024217	0.00065723	3	0.8799	0	0.0212524
ApoA	ENSG00000078043	PIAS2	0.021795	0.0051132	2.0208e-05	19	0.60191	0.021795	0.0051132	2.0208e-05	19	0.60191	0	0.00145173
ApoA	ENSG00000078140	UBE2K	-0.051367	0.027568	0.062425	7	0.00069231	-0.064834	0.017255	0.00017175	6	0.14935	1	0.0078272
ApoA	ENSG00000078177	N4BP2	-0.012901	0.0036524	0.0004121	26	0.91435	-0.012901	0.0036524	0.0004121	26	0.91435	0	0.0151109
ApoA	ENSG00000078487	ZCWPW1	0.033395	0.010978	0.0023503	10	0.018242	0.03066	0.0093553	0.0010482	9	0.1208	1	0.0297015
ApoA	ENSG00000079459	FDFT1	-0.016415	0.0035888	4.7836e-06	51	0.0007656	-0.020601	0.0030732	2.0363e-11	48	0.15393	3	8.05069e-09
ApoA	ENSG00000079999	KEAP1	-0.1348	0.02541	1.1269e-07	3	0.55533	-0.1348	0.02541	1.1269e-07	3	0.55533	0	1.83424e-05
ApoA	ENSG00000087157	PGS1	-0.10685	0.017029	3.4997e-10	3	0.59058	-0.10685	0.017029	3.4997e-10	3	0.59058	0	1.07406e-07
ApoA	ENSG00000088298	EDEM2	0.033867	0.013348	0.011169	11	0.00090673	0.04083	0.0095127	1.7698e-05	10	0.11418	1	0.00130445
ApoA	ENSG00000088448	ANKRD10	0.027185	0.0060635	7.3485e-06	19	0.88395	0.027185	0.0060635	7.3485e-06	19	0.88395	0	0.000629992
ApoA	ENSG00000090621	PABPC4	0.18063	0.019331	9.2756e-21	4	0.22479	0.18063	0.019331	9.2756e-21	4	0.22479	0	1.32846e-17
ApoA	ENSG00000091542	ALKBH5	0.044341	0.012321	0.00031966	5	0.17755	0.044341	0.012321	0.00031966	5	0.17755	0	0.0124864
ApoA	ENSG00000095485	CWF19L1	0.033751	0.0060022	1.8761e-08	27	5.4653e-05	0.033402	0.0046841	9.9738e-13	25	0.06783	2	4.9058e-10
ApoA	ENSG00000095627	TDRD1	-0.068593	0.019536	0.00044639	3	0.45437	-0.068593	0.019536	0.00044639	3	0.45437	0	0.0160322
ApoA	ENSG00000096092	TMEM14A	-0.05505	0.025504	0.030892	5	0.016022	-0.044809	0.013458	0.00086993	4	0.46631	1	0.0259381
ApoA	ENSG00000099250	NRP1	0.025098	0.008784	0.0042734	17	0.0072998	0.022169	0.0063997	0.00053218	16	0.34728	1	0.0182518
ApoA	ENSG00000099284	H2AFY2	-0.03544	0.010007	0.00039782	9	0.77047	-0.03544	0.010007	0.00039782	9	0.77047	0	0.0147296
ApoA	ENSG00000100003	SEC14L2	0.10625	0.027145	9.0716e-05	4	0.093926	0.10625	0.027145	9.0716e-05	4	0.093926	0	0.00477471
ApoA	ENSG00000100100	PIK3IP1	0.017065	0.0055648	0.0021654	28	0.1289	0.017065	0.0055648	0.0021654	28	0.1289	0	0.0487716
ApoA	ENSG00000100147	CCDC134	-0.029127	0.006994	3.1199e-05	12	0.45966	-0.029127	0.006994	3.1199e-05	12	0.45966	0	0.00206091
ApoA	ENSG00000100201	DDX17	-0.044642	0.0081394	4.1426e-08	4	0.79076	-0.044642	0.0081394	4.1426e-08	4	0.79076	0	7.63103e-06
ApoA	ENSG00000100221	JOSD1	0.045274	0.012342	0.00024432	6	0.3069	0.045274	0.012342	0.00024432	6	0.3069	0	0.0102621
ApoA	ENSG00000100242	SUN2	0.032144	0.0076587	2.7038e-05	19	0.0665	0.032144	0.0076587	2.7038e-05	19	0.0665	0	0.00183799
ApoA	ENSG00000100815	TRIP11	0.029276	0.0088846	0.00098388	9	0.39065	0.029276	0.0088846	0.00098388	9	0.39065	0	0.0283232
ApoA	ENSG00000100979	PLTP	0.016056	0.0051298	0.0017487	33	0.017248	0.018647	0.0046414	5.8837e-05	32	0.13595	1	0.00339142
ApoA	ENSG00000101017	CD40	0.018544	0.0058167	0.0014319	18	0.24713	0.018544	0.0058167	0.0014319	18	0.24713	0	0.036876
ApoA	ENSG00000101160	CTSZ	0.030529	0.0094923	0.0012992	8	0.50139	0.030529	0.0094923	0.0012992	8	0.50139	0	0.0345425
ApoA	ENSG00000101294	HM13	0.028124	0.0068181	3.7095e-05	14	0.28694	0.028124	0.0068181	3.7095e-05	14	0.28694	0	0.00235456
ApoA	ENSG00000102871	TRADD	-0.038292	0.00634	1.5432e-09	8	0.46961	-0.038292	0.00634	1.5432e-09	8	0.46961	0	4.04011e-07
ApoA	ENSG00000102890	ELMO3	0.09729	0.058018	0.093563	5	1.2589e-06	0.071442	0.017539	4.6337e-05	3	0.15872	2	0.00281754
ApoA	ENSG00000102977	ACD	-0.1369	0.02331	4.2733e-09	7	0.057615	-0.1369	0.02331	4.2733e-09	7	0.057615	0	1.00932e-06
ApoA	ENSG00000103037	SETD6	0.043922	0.014344	0.0021988	7	0.20633	0.043922	0.014344	0.0021988	7	0.20633	0	0.0492316
ApoA	ENSG00000103199	ZNF500	-0.020096	0.0063668	0.0015979	18	0.12465	-0.020096	0.0063668	0.0015979	18	0.12465	0	0.039864
ApoA	ENSG00000103507	BCKDK	0.036663	0.010911	0.00077844	14	0.04424	0.041828	0.0086093	1.1833e-06	13	0.37449	1	0.000136921
ApoA	ENSG00000103550	C16orf88	0.0251	0.0079587	0.0016115	6	0.61378	0.0251	0.0079587	0.0016115	6	0.61378	0	0.0400538
ApoA	ENSG00000103642	LACTB	0.057044	0.015357	0.00020364	9	0.075745	0.057044	0.015357	0.00020364	9	0.075745	0	0.00891615
ApoA	ENSG00000103653	CSK	-0.027794	0.0061747	6.7526e-06	19	0.75889	-0.027794	0.0061747	6.7526e-06	19	0.75889	0	0.000586834
ApoA	ENSG00000103769	RAB11A	0.044999	0.013332	0.0007373	3	0.90683	0.044999	0.013332	0.0007373	3	0.90683	0	0.0230491
ApoA	ENSG00000103932	RPAP1	0.03453	0.0081301	2.1641e-05	26	0.00076268	0.033929	0.0064487	1.4299e-07	23	0.17794	3	2.23887e-05
ApoA	ENSG00000104447	TRPS1	0.19701	0.018293	4.7953e-27	4	0.54412	0.19701	0.018293	4.7953e-27	4	0.54412	0	1.23986e-23
ApoA	ENSG00000104518	GSDMD	-0.018713	0.0075005	0.012598	23	1.2951e-05	-0.018874	0.0053601	0.00042951	20	0.13273	3	0.0155675
ApoA	ENSG00000104613	INTS10	0.11206	0.054604	0.040154	17	0	0.12254	0.012556	1.6803e-22	8	0.069291	9	2.88784e-19
ApoA	ENSG00000104626	ERI1	-0.071578	0.019194	0.00019212	4	0.48813	-0.071578	0.019194	0.00019212	4	0.48813	0	0.00852806
ApoA	ENSG00000104870	FCGRT	-0.053561	0.029882	0.073067	5	0.00012783	-0.066177	0.01892	0.00046913	4	0.057037	1	0.0166221
ApoA	ENSG00000105479	CCDC114	0.047939	0.014501	0.00094634	4	0.6591	0.047939	0.014501	0.00094634	4	0.6591	0	0.0275668
ApoA	ENSG00000105677	TMEM147	0.055926	0.011565	1.3252e-06	6	0.73333	0.055926	0.011565	1.3252e-06	6	0.73333	0	0.000150597
ApoA	ENSG00000105953	OGDH	0.075047	0.019466	0.00011563	3	0.42478	0.075047	0.019466	0.00011563	3	0.42478	0	0.0057553
ApoA	ENSG00000106780	MEGF9	-0.014288	0.0039265	0.00027379	21	0.4178	-0.014288	0.0039265	0.00027379	21	0.4178	0	0.0111582
ApoA	ENSG00000107290	SETX	-0.049991	0.015459	0.0012219	4	0.52107	-0.049991	0.015459	0.0012219	4	0.52107	0	0.0331356
ApoA	ENSG00000108179	PPIF	0.045711	0.014051	0.0011409	4	0.4293	0.045711	0.014051	0.0011409	4	0.4293	0	0.0315391
ApoA	ENSG00000108296	CWC25	0.037945	0.011257	0.00074982	4	0.63577	0.037945	0.011257	0.00074982	4	0.63577	0	0.0233356
ApoA	ENSG00000108344	PSMD3	-0.077382	0.024286	0.0014408	4	0.05959	-0.077382	0.024286	0.0014408	4	0.05959	0	0.0370301
ApoA	ENSG00000108349	CASC3	-0.032028	0.01659	0.053546	12	1.2035e-06	-0.034567	0.010602	0.0011121	10	0.092487	2	0.03101
ApoA	ENSG00000108424	KPNB1	0.062344	0.018471	0.00073763	3	0.53207	0.062344	0.018471	0.00073763	3	0.53207	0	0.0230496
ApoA	ENSG00000108582	CPD	0.020004	0.0086425	0.020632	15	0.00021867	0.026632	0.005877	5.8564e-06	14	0.13375	1	0.000523742
ApoA	ENSG00000108771	DHX58	0.022395	0.0068217	0.0010272	7	0.27373	0.022395	0.0068217	0.0010272	7	0.27373	0	0.0292426
ApoA	ENSG00000108785	HSD17B1P1	0.017081	0.0053144	0.0013086	4	0.20806	0.017081	0.0053144	0.0013086	4	0.20806	0	0.0347318
ApoA	ENSG00000110025	SNX15	0.063923	0.01563	4.3189e-05	3	0.3624	0.063923	0.01563	4.3189e-05	3	0.3624	0	0.00266214
ApoA	ENSG00000110092	CCND1	0.045072	0.0126	0.0003473	5	0.66947	0.045072	0.0126	0.0003473	5	0.66947	0	0.0133134
ApoA	ENSG00000110934	BIN2	0.0212	0.0069111	0.0021586	6	0.57678	0.0212	0.0069111	0.0021586	6	0.57678	0	0.0486522
ApoA	ENSG00000111328	CDK2AP1	0.037489	0.011173	0.00079317	20	5.8742e-13	0.057738	0.006634	3.2218e-18	11	0.12082	9	3.52552e-15
ApoA	ENSG00000112053	SLC26A8	0.023425	0.011874	0.048514	15	0.00013853	0.026688	0.0086039	0.001923	12	0.12279	3	0.0450998
ApoA	ENSG00000112576	CCND3	0.087543	0.024013	0.00026665	3	0.16012	0.087543	0.024013	0.00026665	3	0.16012	0	0.0109451
ApoA	ENSG00000112624	GLTSCR1L	0.067596	0.022786	0.0030114	7	0.033476	0.084875	0.019804	1.8217e-05	6	0.10173	1	0.00133596
ApoA	ENSG00000113658	SMAD5	-0.015761	0.0040736	0.00010926	27	0.23038	-0.015761	0.0040736	0.00010926	27	0.23038	0	0.00550673
ApoA	ENSG00000113734	BNIP1	-0.032024	0.0075113	2.0126e-05	8	0.66265	-0.032024	0.0075113	2.0126e-05	8	0.66265	0	0.00144776
ApoA	ENSG00000114841	DNAH1	-0.02143	0.034637	0.53612	7	0.00049324	-0.062934	0.014093	7.9791e-06	5	0.60098	2	0.000673383
ApoA	ENSG00000115216	NRBP1	0.063379	0.009926	1.7126e-10	4	0.98871	0.063379	0.009926	1.7126e-10	4	0.98871	0	5.54734e-08
ApoA	ENSG00000115486	GGCX	0.01559	0.0049559	0.0016566	10	0.93416	0.01559	0.0049559	0.0016566	10	0.93416	0	0.0408412
ApoA	ENSG00000115507	OTX1	-0.019204	0.0063916	0.0026596	19	0.041785	-0.016058	0.0049548	0.0011913	18	0.66184	1	0.0325498
ApoA	ENSG00000115756	HPCAL1	-0.020197	0.0059829	0.00073627	19	0.16917	-0.020197	0.0059829	0.00073627	19	0.16917	0	0.023029
ApoA	ENSG00000115839	RAB3GAP1	-0.021116	0.020918	0.31274	7	0.00092562	-0.035028	0.0099975	0.00045883	6	0.37876	1	0.0163304
ApoA	ENSG00000115866	DARS	0.0214	0.0069743	0.0021517	19	0.00077615	0.024233	0.0058279	3.2091e-05	17	0.057699	2	0.00210603
ApoA	ENSG00000116171	SCP2	0.010017	0.003256	0.0020958	37	0.6772	0.010017	0.003256	0.0020958	37	0.6772	0	0.0477562
ApoA	ENSG00000116786	PLEKHM2	-0.041895	0.012375	0.00071053	4	0.32433	-0.041895	0.012375	0.00071053	4	0.32433	0	0.0224811
ApoA	ENSG00000117500	TMED5	-0.020053	0.0052662	0.00014018	23	0.24627	-0.020053	0.0052662	0.00014018	23	0.24627	0	0.00670098
ApoA	ENSG00000117505	DR1	0.022811	0.005125	8.549e-06	30	0.027064	0.025671	0.0047977	8.7676e-08	29	0.11488	1	1.46882e-05
ApoA	ENSG00000117616	C1orf63	-0.041579	0.012209	0.00065998	4	0.65037	-0.041579	0.012209	0.00065998	4	0.65037	0	0.0213202
ApoA	ENSG00000117676	RPS6KA1	0.045135	0.014044	0.0013097	5	0.23343	0.045135	0.014044	0.0013097	5	0.23343	0	0.0347395
ApoA	ENSG00000117713	ARID1A	0.036682	0.0084072	1.2816e-05	17	0.0059211	0.048135	0.0074018	7.8626e-11	16	0.053147	1	2.76773e-08
ApoA	ENSG00000117906	RCN2	0.06907	0.021307	0.0011884	4	0.70555	0.06907	0.021307	0.0011884	4	0.70555	0	0.0324925
ApoA	ENSG00000118520	ARG1	0.015941	0.0059343	0.0072271	19	0.021418	0.017474	0.0046595	0.00017671	18	0.35664	1	0.00800794
ApoA	ENSG00000119185	ITGB1BP1	0.017217	0.0052519	0.0010444	22	0.66624	0.017217	0.0052519	0.0010444	22	0.66624	0	0.0296168
ApoA	ENSG00000119242	CCDC92	0.052126	0.022226	0.01901	14	2.9783e-08	0.086355	0.013801	3.9188e-10	10	0.061348	4	1.18648e-07
ApoA	ENSG00000119541	VPS4B	0.068177	0.017722	0.0001196	3	0.81181	0.068177	0.017722	0.0001196	3	0.81181	0	0.00590861
ApoA	ENSG00000119965	C10orf88	-0.021064	0.0065057	0.0012046	13	0.55411	-0.021064	0.0065057	0.0012046	13	0.55411	0	0.0327973
ApoA	ENSG00000121083	DYNLL2	0.041534	0.0080927	2.8627e-07	10	0.98009	0.041534	0.0080927	2.8627e-07	10	0.98009	0	4.06807e-05
ApoA	ENSG00000122547	EEPD1	0.04102	0.010181	5.6002e-05	7	0.54377	0.04102	0.010181	5.6002e-05	7	0.54377	0	0.00326393
ApoA	ENSG00000123268	ATF1	-0.030603	0.0075132	4.6359e-05	11	0.90301	-0.030603	0.0075132	4.6359e-05	11	0.90301	0	0.00281829
ApoA	ENSG00000123965	PMS2P5	0.021253	0.0044462	1.7531e-06	7	0.70947	0.021253	0.0044462	1.7531e-06	7	0.70947	0	0.000190057
ApoA	ENSG00000124243	BCAS4	0.018	0.0046067	9.3294e-05	21	0.1503	0.018	0.0046067	9.3294e-05	21	0.1503	0	0.00487853
ApoA	ENSG00000124562	SNRPC	0.046842	0.017619	0.0078474	10	0.0002351	0.073949	0.0090614	3.3277e-16	7	0.43918	3	2.85957e-13
ApoA	ENSG00000124587	PEX6	0.017068	0.0049574	0.00057538	46	0	0.018763	0.0028432	4.1359e-11	41	0.12652	5	1.54921e-08
ApoA	ENSG00000124713	GNMT	-0.04802	0.0074697	1.2882e-10	15	0.0081042	-0.049691	0.0068347	3.5842e-13	14	0.050352	1	1.89366e-10
ApoA	ENSG00000125148	MT2A	-0.023328	0.024517	0.34134	25	0	-0.029488	0.0073978	6.7197e-05	9	0.061864	16	0.00376471
ApoA	ENSG00000125170	DOK4	-0.055203	0.010367	1.0113e-07	10	0.10019	-0.055203	0.010367	1.0113e-07	10	0.10019	0	1.66463e-05
ApoA	ENSG00000125520	SLC2A4RG	0.09488	0.022012	1.6296e-05	3	0.18027	0.09488	0.022012	1.6296e-05	3	0.18027	0	0.0012202
ApoA	ENSG00000125952	MAX	-0.035269	0.010791	0.0010821	11	0.40287	-0.035269	0.010791	0.0010821	11	0.40287	0	0.0303851
ApoA	ENSG00000125977	EIF2S2	-0.036569	0.0095483	0.00012817	10	0.16397	-0.036569	0.0095483	0.00012817	10	0.16397	0	0.00624853
ApoA	ENSG00000126581	BECN1	-0.027739	0.007303	0.00014569	14	0.028601	-0.021361	0.0059325	0.00031743	13	0.26608	1	0.0124288
ApoA	ENSG00000126934	MAP2K2	0.025087	0.0081315	0.0020345	9	0.42191	0.025087	0.0081315	0.0020345	9	0.42191	0	0.0468231
ApoA	ENSG00000127124	HIVEP3	-0.033819	0.0078301	1.5666e-05	12	0.79928	-0.033819	0.0078301	1.5666e-05	12	0.79928	0	0.00118181
ApoA	ENSG00000127603	MACF1	-0.084125	0.017561	1.6632e-06	10	2.8994e-06	-0.092012	0.011433	8.3953e-16	8	0.054427	2	6.72015e-13
ApoA	ENSG00000128245	YWHAH	-0.01562	0.0049763	0.0016964	21	0.98386	-0.01562	0.0049763	0.0016964	21	0.98386	0	0.0414933
ApoA	ENSG00000128923	FAM63B	0.043198	0.055713	0.43813	4	0.011196	-0.036379	0.01103	0.00097319	3	0.40579	1	0.028127
ApoA	ENSG00000130511	SSBP4	-0.035289	0.010565	0.00083716	3	0.33043	-0.035289	0.010565	0.00083716	3	0.33043	0	0.0252314
ApoA	ENSG00000130518	KIAA1683	-0.013016	0.0037374	0.00049681	28	0.53161	-0.013016	0.0037374	0.00049681	28	0.53161	0	0.0173407
ApoA	ENSG00000130748	TMEM160	0.027908	0.033069	0.3987	7	0.016147	0.083954	0.025387	0.0009432	6	0.28596	1	0.027497
ApoA	ENSG00000130766	SESN2	-0.049464	0.013929	0.00038359	5	0.56387	-0.049464	0.013929	0.00038359	5	0.56387	0	0.0143489
ApoA	ENSG00000130770	ATPIF1	-0.038549	0.010143	0.00014443	11	0.11665	-0.038549	0.010143	0.00014443	11	0.11665	0	0.00684796
ApoA	ENSG00000130921	C12orf65	0.27187	0.024441	9.6351e-29	3	0.85981	0.27187	0.024441	9.6351e-29	3	0.85981	0	2.78722e-25
ApoA	ENSG00000131323	TRAF3	-0.038084	0.016533	0.02125	8	0.014933	-0.042285	0.012437	0.00067431	7	0.27327	1	0.0216573
ApoA	ENSG00000131791	PRKAB2	-0.018704	0.0058837	0.0014779	6	0.79089	-0.018704	0.0058837	0.0014779	6	0.79089	0	0.0377017
ApoA	ENSG00000132600	PRMT7	0.052231	0.022293	0.019131	11	4.6907e-10	0.076143	0.014134	7.1551e-08	7	0.054793	4	1.23116e-05
ApoA	ENSG00000132740	IGHMBP2	-0.024045	0.0050223	1.6865e-06	29	0.00020982	-0.023329	0.0041359	1.6953e-08	27	0.053563	2	3.45409e-06
ApoA	ENSG00000132781	MUTYH	0.021984	0.0067966	0.0012184	15	0.32367	0.021984	0.0067966	0.0012184	15	0.32367	0	0.0330713
ApoA	ENSG00000133246	PRAM1	0.041669	0.0085761	1.1817e-06	4	0.44721	0.041669	0.0085761	1.1817e-06	4	0.44721	0	0.00013679
ApoA	ENSG00000134184	GSTM1	-0.025078	0.004286	4.8792e-09	44	2.8253e-08	-0.020523	0.0033765	1.2156e-09	38	0.064902	6	3.26436e-07
ApoA	ENSG00000134186	PRPF38B	-0.068407	0.020332	0.00076668	3	0.57048	-0.068407	0.020332	0.00076668	3	0.57048	0	0.0236863
ApoA	ENSG00000134201	GSTM5	-0.064529	0.021396	0.0025617	8	7.9228e-05	-0.057611	0.015756	0.00025565	5	0.067454	3	0.0106083
ApoA	ENSG00000134202	GSTM3	-0.013412	0.0049516	0.0067549	43	1.6986e-14	-0.010511	0.0032198	0.0010962	34	0.086525	9	0.0306778
ApoA	ENSG00000134318	ROCK2	0.038769	0.011507	0.00075396	4	0.68956	0.038769	0.011507	0.00075396	4	0.68956	0	0.023427
ApoA	ENSG00000134571	MYBPC3	0.034986	0.0079272	1.0177e-05	36	0	0.051022	0.005247	2.3834e-22	28	0.12744	8	3.97919e-19
ApoA	ENSG00000134575	ACP2	-0.061181	0.0069824	1.9152e-18	27	3.9738e-07	-0.068258	0.0052834	3.5107e-38	19	0.071581	8	1.93532e-34
ApoA	ENSG00000134824	FADS2	-0.038178	0.0050469	3.8859e-14	26	0.019236	-0.037247	0.0046536	1.2053e-15	25	0.092331	1	9.44109e-13
ApoA	ENSG00000134825	TMEM258	-0.10351	0.0093486	1.7102e-28	9	0.25111	-0.10351	0.0093486	1.7102e-28	9	0.25111	0	4.85116e-25
ApoA	ENSG00000134827	TCN1	-0.020558	0.0099399	0.038616	11	0.032883	-0.023942	0.0074467	0.0013041	10	0.37828	1	0.0346381
ApoA	ENSG00000135114	OASL	0.023277	0.00593	8.6648e-05	25	0.037066	0.022043	0.005315	3.3628e-05	24	0.19004	1	0.00218724
ApoA	ENSG00000135218	CD36	-0.0099785	0.0038722	0.0099683	37	0.015984	-0.012811	0.0038491	0.00087374	36	0.051404	1	0.0260231
ApoA	ENSG00000135249	RINT1	-0.061223	0.015811	0.00010781	4	0.81104	-0.061223	0.015811	0.00010781	4	0.81104	0	0.00545529
ApoA	ENSG00000135299	ANKRD6	-0.062777	0.016439	0.00013412	4	0.49691	-0.062777	0.016439	0.00013412	4	0.49691	0	0.00647165
ApoA	ENSG00000135334	AKIRIN2	-0.04262	0.011464	0.000201	7	0.61296	-0.04262	0.011464	0.000201	7	0.61296	0	0.00883233
ApoA	ENSG00000135452	TSPAN31	0.014184	0.017373	0.41424	11	8.2674e-06	0.039944	0.010085	7.465e-05	7	0.24422	4	0.00408819
ApoA	ENSG00000135631	RAB11FIP5	0.028595	0.0070605	5.1225e-05	10	0.5107	0.028595	0.0070605	5.1225e-05	10	0.5107	0	0.00305126
ApoA	ENSG00000135766	EGLN1	0.039646	0.011606	0.00063573	3	0.63389	0.039646	0.011606	0.00063573	3	0.63389	0	0.0207324
ApoA	ENSG00000135821	GLUL	-0.0080709	0.026992	0.76493	6	0.006385	-0.03503	0.010902	0.0013125	5	0.95744	1	0.0347885
ApoA	ENSG00000135862	LAMC1	-0.01705	0.0045325	0.00016874	34	0.0076582	-0.016471	0.0040425	4.6122e-05	33	0.095069	1	0.00280797
ApoA	ENSG00000137154	RPS6	-0.054203	0.017005	0.001435	3	0.5455	-0.054203	0.017005	0.001435	3	0.5455	0	0.03692
ApoA	ENSG00000137161	CNPY3	0.15521	0.016951	5.3742e-20	5	0.57215	0.15521	0.016951	5.3742e-20	5	0.57215	0	7.02956e-17
ApoA	ENSG00000137266	SLC22A23	0.025967	0.0076155	0.0006501	11	0.37852	0.025967	0.0076155	0.0006501	11	0.37852	0	0.0210857
ApoA	ENSG00000137802	MAPKBP1	-0.094336	0.021116	7.9134e-06	3	0.35205	-0.094336	0.021116	7.9134e-06	3	0.35205	0	0.000668998
ApoA	ENSG00000137845	ADAM10	0.091892	0.028333	0.0011815	10	5.6621e-15	0.10567	0.0095785	2.6757e-28	4	0.29208	6	7.37509e-25
ApoA	ENSG00000137877	SPTBN5	-0.024364	0.006659	0.00025334	12	0.69634	-0.024364	0.006659	0.00025334	12	0.69634	0	0.0105376
ApoA	ENSG00000137880	GCHFR	-0.051471	0.02055	0.012257	7	0.00030676	-0.039642	0.0098753	5.9621e-05	6	0.35789	1	0.00342296
ApoA	ENSG00000137942	FNBP1L	0.044629	0.013402	0.00086857	7	0.17157	0.044629	0.013402	0.00086857	7	0.17157	0	0.0259108
ApoA	ENSG00000138029	HADHB	0.077868	0.023336	0.00084754	3	0.1519	0.077868	0.023336	0.00084754	3	0.1519	0	0.0254434
ApoA	ENSG00000138399	FASTKD1	0.019412	0.0079235	0.014287	7	0.034054	0.016798	0.0051378	0.0010772	6	0.64992	1	0.0302883
ApoA	ENSG00000138439	FAM117B	0.0098131	0.002939	0.00084102	41	0.062132	0.0098131	0.002939	0.00084102	41	0.062132	0	0.0253164
ApoA	ENSG00000138617	PARP16	0.019195	0.00575	0.00084285	17	0.47744	0.019195	0.00575	0.00084285	17	0.47744	0	0.0253393
ApoA	ENSG00000138688	KIAA1109	0.043136	0.01317	0.0010552	3	0.46552	0.043136	0.01317	0.0010552	3	0.46552	0	0.0298478
ApoA	ENSG00000138780	GSTCD	-0.052622	0.015005	0.00045344	3	0.5301	-0.052622	0.015005	0.00045344	3	0.5301	0	0.0161918
ApoA	ENSG00000138829	FBN2	-0.011914	0.0033736	0.00041303	32	0.38152	-0.011914	0.0033736	0.00041303	32	0.38152	0	0.0151393
ApoA	ENSG00000139323	POC1B	-0.02857	0.0088576	0.0012577	9	0.55642	-0.02857	0.0088576	0.0012577	9	0.55642	0	0.0337741
ApoA	ENSG00000139531	SUOX	-0.01959	0.0060783	0.001269	19	0.47451	-0.01959	0.0060783	0.001269	19	0.47451	0	0.033987
ApoA	ENSG00000139572	GPR84	0.038681	0.019611	0.048559	5	0.011305	0.033168	0.010353	0.0013567	4	0.76937	1	0.0355727
ApoA	ENSG00000139625	MAP3K12	0.057218	0.017298	0.00094058	6	0.34329	0.057218	0.017298	0.00094058	6	0.34329	0	0.0274398
ApoA	ENSG00000139726	DENR	0.039863	0.054945	0.46814	7	3.048e-11	0.057145	0.012882	9.1704e-06	4	0.41598	3	0.000754524
ApoA	ENSG00000140030	GPR65	-0.026619	0.0074375	0.0003448	10	0.71869	-0.026619	0.0074375	0.0003448	10	0.71869	0	0.01324
ApoA	ENSG00000140105	WARS	0.022625	0.0036451	5.4006e-10	21	0.39939	0.022625	0.0036451	5.4006e-10	21	0.39939	0	1.59222e-07
ApoA	ENSG00000140299	BNIP2	-0.037028	0.012096	0.0022056	3	0.79952	-0.037028	0.012096	0.0022056	3	0.79952	0	0.0493196
ApoA	ENSG00000140382	HMG20A	-0.035461	0.011475	0.0019989	7	0.44422	-0.035461	0.011475	0.0019989	7	0.44422	0	0.0462956
ApoA	ENSG00000140474	ULK3	-0.023216	0.0065853	0.00042271	25	0.0067359	-0.025766	0.0053196	1.2753e-06	24	0.23199	1	0.000145662
ApoA	ENSG00000140545	MFGE8	0.019958	0.005334	0.00018283	12	0.79824	0.019958	0.005334	0.00018283	12	0.79824	0	0.00820166
ApoA	ENSG00000140931	CMTM3	0.033364	0.013665	0.014622	10	0.0041718	0.043186	0.010987	8.4706e-05	9	0.10046	1	0.00453104
ApoA	ENSG00000141252	VPS53	0.018313	0.0041909	1.2444e-05	22	0.33982	0.018313	0.0041909	1.2444e-05	22	0.33982	0	0.00097161
ApoA	ENSG00000141452	C18orf8	0.035418	0.0091425	0.00010706	7	0.44504	0.035418	0.0091425	0.00010706	7	0.44504	0	0.00542486
ApoA	ENSG00000141699	FAM134C	0.084246	0.020046	2.6392e-05	7	0.27244	0.084246	0.020046	2.6392e-05	7	0.27244	0	0.00179994
ApoA	ENSG00000142230	SAE1	0.061511	0.013	2.2277e-06	5	0.50412	0.061511	0.013	2.2277e-06	5	0.50412	0	0.000232983
ApoA	ENSG00000142546	NOSIP	0.080641	0.012865	3.6521e-10	6	0.67128	0.080641	0.012865	3.6521e-10	6	0.67128	0	1.11149e-07
ApoA	ENSG00000142552	RCN3	-0.035146	0.019325	0.068967	7	1.6593e-05	-0.038103	0.0077308	8.2749e-07	5	0.8817	2	0.000100485
ApoA	ENSG00000142675	CNKSR1	0.057413	0.016817	0.00064022	3	0.64827	0.057413	0.016817	0.00064022	3	0.64827	0	0.0208392
ApoA	ENSG00000142867	BCL10	-0.028577	0.0083315	0.00060364	9	0.38146	-0.028577	0.0083315	0.00060364	9	0.38146	0	0.0200029
ApoA	ENSG00000143401	ANP32E	0.089821	0.026028	0.00055873	5	0.032616	0.079337	0.021932	0.00029767	4	0.15369	1	0.011852
ApoA	ENSG00000143452	HORMAD1	-0.047691	0.016535	0.0039241	6	0.018106	-0.044263	0.014484	0.0022426	5	0.12531	1	0.0499124
ApoA	ENSG00000144199	FAHD2B	0.034625	0.0085546	5.1764e-05	3	0.33022	0.034625	0.0085546	5.1764e-05	3	0.33022	0	0.00307271
ApoA	ENSG00000144218	AFF3	-0.024987	0.0063605	8.5481e-05	14	0.61264	-0.024987	0.0063605	8.5481e-05	14	0.61264	0	0.00455914
ApoA	ENSG00000144231	POLR2D	-0.040715	0.0075544	7.0663e-08	12	0.50523	-0.040715	0.0075544	7.0663e-08	12	0.50523	0	1.21947e-05
ApoA	ENSG00000144401	METTL21A	-0.011019	0.003283	0.00078998	29	0.20213	-0.011019	0.003283	0.00078998	29	0.20213	0	0.0241912
ApoA	ENSG00000145107	TM4SF19	-0.052044	0.014795	0.0004352	4	0.32108	-0.052044	0.014795	0.0004352	4	0.32108	0	0.015725
ApoA	ENSG00000145214	DGKQ	0.014693	0.0026682	3.656e-08	41	0.09177	0.014693	0.0026682	3.656e-08	41	0.09177	0	6.85606e-06
ApoA	ENSG00000145284	SCD5	-0.018473	0.0031702	5.6448e-09	25	0.53323	-0.018473	0.0031702	5.6448e-09	25	0.53323	0	1.2915e-06
ApoA	ENSG00000145685	LHFPL2	-0.04551	0.011857	0.00012396	5	0.7866	-0.04551	0.011857	0.00012396	5	0.7866	0	0.00608389
ApoA	ENSG00000146223	RPL7L1	-0.02703	0.0084747	0.001425	4	0.38808	-0.02703	0.0084747	0.001425	4	0.38808	0	0.0367566
ApoA	ENSG00000146285	SCML4	-0.024838	0.0068048	0.00026214	20	0.053918	-0.024838	0.0068048	0.00026214	20	0.053918	0	0.0108101
ApoA	ENSG00000146707	POMZP3	0.0087825	0.002718	0.0012324	43	0.25457	0.0087825	0.002718	0.0012324	43	0.25457	0	0.0333152
ApoA	ENSG00000148296	SURF6	0.01833	0.0087109	0.035355	8	0.017641	0.02377	0.005141	3.7691e-06	7	0.76431	1	0.000360937
ApoA	ENSG00000148297	MED22	0.025131	0.0086223	0.0035608	14	0.011882	0.030173	0.0060228	5.4514e-07	13	0.42238	1	7.06116e-05
ApoA	ENSG00000148926	ADM	0.022119	0.0068172	0.001176	19	0.11714	0.022119	0.0068172	0.001176	19	0.11714	0	0.03225
ApoA	ENSG00000149084	HSD17B12	0.013179	0.0032736	5.6761e-05	28	0.45072	0.013179	0.0032736	5.6761e-05	28	0.45072	0	0.00329765
ApoA	ENSG00000149177	PTPRJ	0.11346	0.032098	0.00040811	5	0.00031215	0.11683	0.024173	1.3435e-06	3	0.13243	2	0.000152617
ApoA	ENSG00000149179	C11orf49	0.22805	0.082737	0.0058451	4	0.0022686	0.18851	0.05328	0.00040303	3	0.1871	1	0.0148641
ApoA	ENSG00000149289	ZC3H12C	0.034795	0.0058944	3.5672e-09	16	0.16382	0.034795	0.0058944	3.5672e-09	16	0.16382	0	8.59216e-07
ApoA	ENSG00000149485	FADS1	-0.085126	0.011313	5.2956e-14	21	0.00017744	-0.050563	0.011908	2.175e-05	19	0.16397	2	0.00154503
ApoA	ENSG00000149531	FRG1B	0.029516	0.0084771	0.0004979	10	0.011468	0.029716	0.0079804	0.00019641	8	0.068782	2	0.00867238
ApoA	ENSG00000149577	SIDT2	-0.03128	0.0099891	0.0017396	44	0	-0.022665	0.00333	1e-11	33	0.11024	11	4.20388e-09
ApoA	ENSG00000149591	TAGLN	-0.026667	0.012328	0.030531	40	0	-0.019823	0.0041148	1.4531e-06	29	0.085932	11	0.000162229
ApoA	ENSG00000149922	TBX6	-0.024734	0.013187	0.060702	8	0.049477	-0.031144	0.0088402	0.00042667	7	0.48575	1	0.0154934
ApoA	ENSG00000150593	PDCD4	0.024295	0.0072377	0.00078848	8	0.44579	0.024295	0.0072377	0.00078848	8	0.44579	0	0.0241605
ApoA	ENSG00000150967	ABCB9	0.062115	0.022225	0.0051936	11	4.9846e-09	0.075357	0.010236	1.8123e-13	7	0.26238	4	1.01827e-10
ApoA	ENSG00000150977	RILPL2	-0.012406	0.012984	0.33933	29	0	-0.017687	0.0053305	0.00090647	23	0.16509	6	0.0266952
ApoA	ENSG00000150990	DHX37	-0.085499	0.075094	0.25489	4	0.0059915	-0.13339	0.024365	4.3863e-08	3	0.83665	1	8.00466e-06
ApoA	ENSG00000151503	NCAPD3	0.031831	0.0091587	0.00050981	10	0.37802	0.031831	0.0091587	0.00050981	10	0.37802	0	0.0176797
ApoA	ENSG00000151689	INPP1	-0.022712	0.0073712	0.0020624	11	0.26316	-0.022712	0.0073712	0.0020624	11	0.26316	0	0.0472457
ApoA	ENSG00000152061	RABGAP1L	-0.034815	0.010414	0.00082833	6	0.36805	-0.034815	0.010414	0.00082833	6	0.36805	0	0.0250246
ApoA	ENSG00000153406	NMRAL1	0.01442	0.0037452	0.00011795	27	0.41878	0.01442	0.0037452	0.00011795	27	0.41878	0	0.0058439
ApoA	ENSG00000153879	CEBPG	0.11681	0.033162	0.00042779	4	0.30506	0.11681	0.033162	0.00042779	4	0.30506	0	0.0155206
ApoA	ENSG00000154328	NEIL2	-0.030107	0.0045754	4.6986e-11	16	0.43254	-0.030107	0.0045754	4.6986e-11	16	0.43254	0	1.74433e-08
ApoA	ENSG00000154767	XPC	-0.056896	0.018433	0.002024	3	0.35898	-0.056896	0.018433	0.002024	3	0.35898	0	0.0466697
ApoA	ENSG00000155636	RBM45	0.050068	0.014801	0.0007178	4	0.54492	0.050068	0.014801	0.0007178	4	0.54492	0	0.0226357
ApoA	ENSG00000156232	WHAMM	0.021578	0.0068905	0.0017387	12	0.62804	0.021578	0.0068905	0.0017387	12	0.62804	0	0.0422274
ApoA	ENSG00000156265	C21orf7	-0.030392	0.0077603	8.9893e-05	13	0.66528	-0.030392	0.0077603	8.9893e-05	13	0.66528	0	0.00473976
ApoA	ENSG00000156876	SASS6	-0.026082	0.0070317	0.0002079	6	0.87028	-0.026082	0.0070317	0.0002079	6	0.87028	0	0.00905383
ApoA	ENSG00000157895	C12orf43	0.028989	0.0080822	0.00033471	18	0.0254	0.026544	0.0076208	0.00049574	17	0.087885	1	0.0173213
ApoA	ENSG00000157992	KRTCAP3	-0.030751	0.012697	0.015441	8	6.2815e-05	-0.035719	0.0080644	9.456e-06	6	0.10713	2	0.000775185
ApoA	ENSG00000158792	SPATA2L	0.020302	0.0054282	0.00018391	19	0.81771	0.020302	0.0054282	0.00018391	19	0.81771	0	0.0082362
ApoA	ENSG00000158805	ZNF276	0.029266	0.0081595	0.00033485	8	0.97378	0.029266	0.0081595	0.00033485	8	0.97378	0	0.0129375
ApoA	ENSG00000158825	CDA	-0.011132	0.0035508	0.0017185	28	0.093854	-0.011132	0.0035508	0.0017185	28	0.093854	0	0.0418656
ApoA	ENSG00000159199	ATP5G1	0.028024	0.0072667	0.00011504	10	0.79937	0.028024	0.0072667	0.00011504	10	0.79937	0	0.00573082
ApoA	ENSG00000160613	PCSK7	0.096989	0.015307	2.3571e-10	16	4.134e-09	0.096389	0.0091263	4.4835e-26	11	0.12942	5	1.0826e-22
ApoA	ENSG00000160691	SHC1	-0.050679	0.016513	0.0021483	5	0.011477	-0.041495	0.0079611	1.8661e-07	4	0.78281	1	2.81476e-05
ApoA	ENSG00000160710	ADAR	-0.084911	0.027076	0.0017126	5	0.016587	-0.09327	0.024448	0.00013614	4	0.059502	1	0.00654965
ApoA	ENSG00000160746	ANO10	-0.03842	0.012262	0.0017288	6	0.95691	-0.03842	0.012262	0.0017288	6	0.95691	0	0.0420394
ApoA	ENSG00000160766	GBAP1	0.009332	0.0051509	0.070031	28	8.163e-05	0.013721	0.0041467	0.00093676	25	0.068675	3	0.0273666
ApoA	ENSG00000161395	PGAP3	-0.064007	0.0087298	2.2684e-13	15	0.05687	-0.064007	0.0087298	2.2684e-13	15	0.05687	0	1.24579e-10
ApoA	ENSG00000162711	NLRP3	-0.019253	0.0057853	0.00087476	21	0.85449	-0.019253	0.0057853	0.00087476	21	0.85449	0	0.0260396
ApoA	ENSG00000162877	PM20D1	-0.020343	0.0062715	0.0011798	11	0.73104	-0.020343	0.0062715	0.0011798	11	0.73104	0	0.032336
ApoA	ENSG00000162888	C1orf147	0.02258	0.0071525	0.0015941	4	0.81115	0.02258	0.0071525	0.0015941	4	0.81115	0	0.0398041
ApoA	ENSG00000163485	ADORA1	-0.017721	0.0050219	0.00041749	16	0.5103	-0.017721	0.0050219	0.00041749	16	0.5103	0	0.0152529
ApoA	ENSG00000163788	SNRK	0.061992	0.018651	0.0008879	3	0.77119	0.061992	0.018651	0.0008879	3	0.77119	0	0.0262994
ApoA	ENSG00000163933	RFT1	0.032361	0.0098304	0.00099491	10	0.064757	0.032361	0.0098304	0.00099491	10	0.064757	0	0.0285683
ApoA	ENSG00000163935	SFMBT1	0.064824	0.046551	0.16376	5	0.0065896	0.093416	0.022362	2.9469e-05	4	0.38494	1	0.00196799
ApoA	ENSG00000163945	UVSSA	0.0037424	0.006787	0.58135	19	0.00035205	0.018935	0.0055172	0.00059903	16	0.20417	3	0.019902
ApoA	ENSG00000164530	PI16	-0.013253	0.003505	0.00015616	27	0.44827	-0.013253	0.003505	0.00015616	27	0.44827	0	0.00727096
ApoA	ENSG00000164535	DAGLB	0.034561	0.0067186	2.6886e-07	25	0.0051985	0.022045	0.006444	0.00062391	24	0.071883	1	0.0204841
ApoA	ENSG00000164707	SLC13A4	-0.04072	0.010584	0.0001195	9	0.28262	-0.04072	0.010584	0.0001195	9	0.28262	0	0.00590467
ApoA	ENSG00000164849	GPR146	0.037789	0.00698	6.1654e-08	13	0.015547	0.038346	0.0063956	2.0259e-09	11	0.083262	2	5.18308e-07
ApoA	ENSG00000164850	GPER	0.041844	0.019465	0.031577	8	0.00033228	0.047852	0.010613	6.5215e-06	5	0.36256	3	0.000570817
ApoA	ENSG00000164916	FOXK1	-0.036128	0.0073625	9.2486e-07	7	0.63295	-0.036128	0.0073625	9.2486e-07	7	0.63295	0	0.000110654
ApoA	ENSG00000164929	BAALC	0.046611	0.014586	0.0013957	3	0.91526	0.046611	0.014586	0.0013957	3	0.91526	0	0.0362279
ApoA	ENSG00000165118	C9orf64	-0.030393	0.0085924	0.00040445	10	0.47077	-0.030393	0.0085924	0.00040445	10	0.47077	0	0.0149014
ApoA	ENSG00000166035	LIPC	0.07485	0.050706	0.1399	7	0	0.099789	0.0072564	4.9598e-43	4	0.98436	3	4.02529e-39
ApoA	ENSG00000166261	ZNF202	-0.068194	0.02165	0.0016335	3	0.76229	-0.068194	0.02165	0.0016335	3	0.76229	0	0.040456
ApoA	ENSG00000166436	TRIM66	-0.0082265	0.0026666	0.0020352	36	0.11592	-0.0082265	0.0026666	0.0020352	36	0.11592	0	0.0468277
ApoA	ENSG00000166548	TK2	0.017274	0.0092302	0.061285	13	4.9418e-05	0.022142	0.0058165	0.00014082	11	0.20942	2	0.00672058
ApoA	ENSG00000166896	XRCC6BP1	-0.013148	0.0054088	0.015062	29	2.6916e-06	-0.012976	0.0041533	0.0017827	23	0.081554	6	0.0428896
ApoA	ENSG00000166925	TSC22D4	-0.062233	0.014883	2.897e-05	6	0.54745	-0.062233	0.014883	2.897e-05	6	0.54745	0	0.00194489
ApoA	ENSG00000167261	DPEP2	0.030765	0.016733	0.065979	14	1.1102e-16	0.072476	0.011615	4.3717e-10	8	0.083306	6	1.31081e-07
ApoA	ENSG00000167264	DUS2L	0.055559	0.0097524	1.2198e-08	27	5.5511e-16	0.031892	0.0051812	7.4917e-10	24	0.11087	3	2.13532e-07
ApoA	ENSG00000167315	ACAA2	-0.16199	0.12627	0.19952	4	3.0444e-08	-0.10611	0.011858	3.5904e-19	3	0.45304	1	4.29921e-16
ApoA	ENSG00000167377	ZNF23	-0.036134	0.010277	0.00043787	12	0.18803	-0.036134	0.010277	0.00043787	12	0.18803	0	0.0157961
ApoA	ENSG00000167394	ZNF668	0.023067	0.01226	0.059915	16	0.00015194	0.024753	0.0077854	0.0014755	14	0.30835	2	0.0376628
ApoA	ENSG00000167397	VKORC1	0.076095	0.016949	7.131e-06	3	0.60449	0.076095	0.016949	7.131e-06	3	0.60449	0	0.000614591
ApoA	ENSG00000167618	LAIR2	-0.016184	0.0051769	0.0017706	14	0.5245	-0.016184	0.0051769	0.0017706	14	0.5245	0	0.042711
ApoA	ENSG00000167842	MIS12	0.021749	0.0058572	0.00020468	21	0.52498	0.021749	0.0058572	0.00020468	21	0.52498	0	0.00894828
ApoA	ENSG00000168056	LTBP3	-0.030402	0.013201	0.021273	20	3.2994e-08	-0.027578	0.0087437	0.0016099	16	0.056532	4	0.040031
ApoA	ENSG00000168092	PAFAH1B2	0.051567	0.042799	0.22826	8	1.1102e-15	0.099706	0.0099279	9.8616e-24	4	0.30126	4	1.90812e-20
ApoA	ENSG00000168517	HEXIM2	0.043235	0.013409	0.0012626	4	0.60927	0.043235	0.013409	0.0012626	4	0.60927	0	0.0338652
ApoA	ENSG00000168765	GSTM4	-0.01224	0.0071275	0.085928	34	0	-0.015285	0.0040406	0.000155	30	0.069489	4	0.00723193
ApoA	ENSG00000169180	XPO6	0.062464	0.014374	1.3886e-05	5	0.11522	0.062464	0.014374	1.3886e-05	5	0.11522	0	0.00106592
ApoA	ENSG00000169228	RAB24	-0.07371	0.017218	1.8609e-05	4	0.41292	-0.07371	0.017218	1.8609e-05	4	0.41292	0	0.00135789
ApoA	ENSG00000169230	PRELID1	-0.014428	0.003805	0.00014952	12	0.25925	-0.014428	0.003805	0.00014952	12	0.25925	0	0.00704487
ApoA	ENSG00000169231	THBS3	-0.008925	0.0084049	0.28829	29	3.1986e-13	-0.016112	0.0049605	0.0011616	26	0.058861	3	0.0319656
ApoA	ENSG00000169592	INO80E	0.038708	0.011887	0.0011288	9	0.05293	0.038708	0.011887	0.0011288	9	0.05293	0	0.0313113
ApoA	ENSG00000169715	MT1E	0.0080807	0.059329	0.89166	9	0	0.047831	0.0084489	1.5031e-08	4	0.66776	5	3.108e-06
ApoA	ENSG00000169896	ITGAM	0.060629	0.017986	0.00074934	3	0.30927	0.060629	0.017986	0.00074934	3	0.30927	0	0.0233257
ApoA	ENSG00000169925	BRD3	-0.027661	0.0062312	9.0299e-06	8	0.8631	-0.027661	0.0062312	9.0299e-06	8	0.8631	0	0.000744852
ApoA	ENSG00000170606	HSPA4	-0.019705	0.0057816	0.00065367	20	0.41396	-0.019705	0.0057816	0.00065367	20	0.41396	0	0.0211769
ApoA	ENSG00000170634	ACYP2	-0.020559	0.0059582	0.00055956	27	0.12229	-0.020559	0.0059582	0.00055956	27	0.12229	0	0.0189286
ApoA	ENSG00000170866	LILRA3	-0.021736	0.0056581	0.00012227	21	1.0748e-08	-0.014992	0.0040358	0.00020336	19	0.10714	2	0.0089079
ApoA	ENSG00000171621	SPSB1	0.031584	0.0076774	3.8905e-05	7	0.70321	0.031584	0.0076774	3.8905e-05	7	0.70321	0	0.00244817
ApoA	ENSG00000171860	C3AR1	0.0073726	0.0022538	0.0010707	34	0.60604	0.0073726	0.0022538	0.0010707	34	0.60604	0	0.0301548
ApoA	ENSG00000172037	LAMB2	0.04052	0.014359	0.0047746	11	0.02201	0.034842	0.0096089	0.00028782	10	0.66809	1	0.0115782
ApoA	ENSG00000172057	ORMDL3	-0.02161	0.0044566	1.2405e-06	39	2.7694e-08	-0.021291	0.0032477	5.5449e-11	34	0.072232	5	2.03014e-08
ApoA	ENSG00000172247	C1QTNF4	0.058062	0.0087233	2.8151e-11	28	2.9617e-11	0.075315	0.0056036	3.5022e-41	21	0.10357	7	2.37962e-37
ApoA	ENSG00000172260	NEGR1	-0.024221	0.0057448	2.4848e-05	13	0.18345	-0.024221	0.0057448	2.4848e-05	13	0.18345	0	0.00171575
ApoA	ENSG00000172375	C2CD2L	-0.012954	0.013155	0.32474	17	3.9847e-06	-0.03192	0.01034	0.0020207	10	0.056512	7	0.046612
ApoA	ENSG00000172500	FIBP	-0.058663	0.013127	7.8645e-06	10	0.0067495	-0.05933	0.012258	1.2987e-06	8	0.058743	2	0.000147942
ApoA	ENSG00000172803	SNX32	-0.056855	0.021182	0.0072733	9	1.442e-07	-0.047329	0.011933	7.2969e-05	7	0.064206	2	0.0040248
ApoA	ENSG00000172831	CES2	-0.15744	0.036111	1.302e-05	3	0.39281	-0.15744	0.036111	1.302e-05	3	0.39281	0	0.00100877
ApoA	ENSG00000173334	TRIB1	-0.12105	0.032793	0.00022308	4	0.36392	-0.12105	0.032793	0.00022308	4	0.36392	0	0.00954784
ApoA	ENSG00000173338	KCNK7	-0.071273	0.014461	8.2811e-07	3	0.383	-0.071273	0.014461	8.2811e-07	3	0.383	0	0.000100519
ApoA	ENSG00000173890	GPR160	0.013182	0.0042994	0.002169	19	0.22606	0.013182	0.0042994	0.002169	19	0.22606	0	0.0488082
ApoA	ENSG00000174196	FAM21D	-0.02861	0.0062813	5.2439e-06	4	0.91366	-0.02861	0.0062813	5.2439e-06	4	0.91366	0	0.000477442
ApoA	ENSG00000174851	YIF1A	0.071341	0.019812	0.00031705	3	0.26797	0.071341	0.019812	0.00031705	3	0.26797	0	0.0124206
ApoA	ENSG00000175115	PACS1	0.049445	0.012253	5.4518e-05	5	0.36239	0.049445	0.012253	5.4518e-05	5	0.36239	0	0.00320107
ApoA	ENSG00000175445	LPL	0.15122	0.021281	1.1972e-12	18	0	0.064118	0.01327	1.3538e-06	11	0.053903	7	0.000153488
ApoA	ENSG00000175806	MSRA	0.020335	0.0084466	0.01606	32	2.0005e-06	0.031138	0.0066244	2.5957e-06	27	0.0891	5	0.000263603
ApoA	ENSG00000176472	ZNF575	0.027625	0.0089001	0.0019098	5	0.77433	0.027625	0.0089001	0.0019098	5	0.77433	0	0.0448939
ApoA	ENSG00000176720	BOK	-0.030095	0.0067639	8.6159e-06	11	0.45048	-0.030095	0.0067639	8.6159e-06	11	0.45048	0	0.000718
ApoA	ENSG00000177030	DEAF1	0.030819	0.0078431	8.5122e-05	7	0.58311	0.030819	0.0078431	8.5122e-05	7	0.58311	0	0.00454664
ApoA	ENSG00000177710	SLC35G5	0.064286	0.019503	0.0009797	3	0.29887	0.064286	0.019503	0.0009797	3	0.29887	0	0.028237
ApoA	ENSG00000178802	MPI	0.036027	0.0073344	9.0112e-07	11	0.41337	0.036027	0.0073344	9.0112e-07	11	0.41337	0	0.000108168
ApoA	ENSG00000178977	LINC00324	-0.016879	0.0052625	0.0013393	18	0.057649	-0.016879	0.0052625	0.0013393	18	0.057649	0	0.0352419
ApoA	ENSG00000179195	ZNF664	-0.12882	0.043247	0.0028944	5	0.0077325	-0.16897	0.022682	9.3665e-14	3	0.19153	2	5.47322e-11
ApoA	ENSG00000180530	NRIP1	0.050733	0.019975	0.011088	7	0.032015	0.056583	0.017125	0.00095261	6	0.14747	1	0.0277077
ApoA	ENSG00000180921	FAM83H	-0.058462	0.015954	0.00024793	5	0.43632	-0.058462	0.015954	0.00024793	5	0.43632	0	0.0103853
ApoA	ENSG00000181192	DHTKD1	0.029556	0.0089503	0.0009593	9	0.81806	0.029556	0.0089503	0.0009593	9	0.81806	0	0.0278471
ApoA	ENSG00000181666	HKR1	0.024653	0.0074761	0.00097529	13	0.86819	0.024653	0.0074761	0.00097529	13	0.86819	0	0.0281577
ApoA	ENSG00000181827	RFX7	0.022131	0.0067515	0.0010456	8	0.22979	0.022131	0.0067515	0.0010456	8	0.22979	0	0.0296422
ApoA	ENSG00000182179	UBA7	0.032736	0.0059832	4.4655e-08	34	9.1988e-08	0.038425	0.0042283	1.0134e-19	31	0.088138	3	1.28733e-16
ApoA	ENSG00000182512	GLRX5	0.01901	0.0057394	0.00092546	12	0.91726	0.01901	0.0057394	0.00092546	12	0.91726	0	0.027126
ApoA	ENSG00000182636	NDN	-0.026098	0.0065393	6.582e-05	12	0.98583	-0.026098	0.0065393	6.582e-05	12	0.98583	0	0.00370461
ApoA	ENSG00000182670	TTC3	-0.01622	0.0045621	0.00037726	23	0.52919	-0.01622	0.0045621	0.00037726	23	0.52919	0	0.0141603
ApoA	ENSG00000182732	RGS6	-0.051554	0.014868	0.00052552	9	0.27607	-0.051554	0.014868	0.00052552	9	0.27607	0	0.0180849
ApoA	ENSG00000182871	COL18A1	0.018551	0.003566	1.9686e-07	28	0.063619	0.018551	0.003566	1.9686e-07	28	0.063619	0	2.95411e-05
ApoA	ENSG00000183255	PTTG1IP	-0.023667	0.0062245	0.0001434	22	0.0056858	-0.022354	0.0055418	5.4889e-05	21	0.067305	1	0.00321768
ApoA	ENSG00000183347	GBP6	-0.094644	0.024275	9.6684e-05	3	0.36469	-0.094644	0.024275	9.6684e-05	3	0.36469	0	0.00501744
ApoA	ENSG00000183426	NPIP	-0.013769	0.003109	9.476e-06	23	0.10714	-0.013769	0.003109	9.476e-06	23	0.10714	0	0.000776389
ApoA	ENSG00000183562	AC131971.1	-0.03017	0.0047245	1.7043e-10	6	0.53727	-0.03017	0.0047245	1.7043e-10	6	0.53727	0	5.52659e-08
ApoA	ENSG00000183723	CMTM4	0.10162	0.024568	3.5269e-05	3	0.93816	0.10162	0.024568	3.5269e-05	3	0.93816	0	0.00226523
ApoA	ENSG00000183726	TMEM50A	-0.01464	0.0043604	0.00078665	19	0.24521	-0.01464	0.0043604	0.00078665	19	0.24521	0	0.0241211
ApoA	ENSG00000183955	SETD8	0.040393	0.0061592	5.4433e-11	9	0.019519	0.037639	0.0050723	1.1657e-13	8	0.15206	1	6.7176e-11
ApoA	ENSG00000184209	SNRNP35	0.14708	0.062117	0.017898	5	0.0031103	0.10431	0.020961	6.4729e-07	4	0.65716	1	8.13152e-05
ApoA	ENSG00000184381	PLA2G6	0.070851	0.014067	4.7347e-07	3	0.93615	0.070851	0.014067	4.7347e-07	3	0.93615	0	6.25096e-05
ApoA	ENSG00000184428	TOP1MT	-0.077897	0.021701	0.00033135	4	0.2718	-0.077897	0.021701	0.00033135	4	0.2718	0	0.0128319
ApoA	ENSG00000184708	EIF4ENIF1	0.084778	0.023427	0.00029595	3	0.551	0.084778	0.023427	0.00029595	3	0.551	0	0.0118109
ApoA	ENSG00000184900	SUMO3	0.040304	0.011866	0.00068226	5	0.97287	0.040304	0.011866	0.00068226	5	0.97287	0	0.0218266
ApoA	ENSG00000185022	MAFF	0.13798	0.030419	5.7325e-06	3	0.16333	0.13798	0.030419	5.7325e-06	3	0.16333	0	0.000514756
ApoA	ENSG00000185485	SDHAP1	0.010425	0.0029575	0.00042334	20	0.40729	0.010425	0.0029575	0.00042334	20	0.40729	0	0.0154147
ApoA	ENSG00000185591	SP1	-0.044615	0.014202	0.0016814	5	0.034908	-0.052727	0.012718	3.3842e-05	4	0.10008	1	0.00219676
ApoA	ENSG00000185614	FAM212A	0.084048	0.018984	9.5416e-06	6	0.21266	0.084048	0.018984	9.5416e-06	6	0.21266	0	0.000780669
ApoA	ENSG00000185619	PCGF3	-0.023355	0.0060497	0.00011311	18	0.087926	-0.023355	0.0060497	0.00011311	18	0.087926	0	0.00565686
ApoA	ENSG00000185651	UBE2L3	-0.031225	0.0059462	1.511e-07	18	0.025338	-0.039042	0.004321	1.6356e-19	17	0.38645	1	2.02489e-16
ApoA	ENSG00000185800	DMWD	0.056957	0.030174	0.059078	6	3.5043e-06	0.03484	0.010066	0.00053811	3	0.91385	3	0.0184141
ApoA	ENSG00000185909	KLHDC8B	0.043019	0.01369	0.0016762	10	2.0531e-05	0.063769	0.0092006	4.1796e-12	6	0.14329	4	1.85586e-09
ApoA	ENSG00000185920	PTCH1	-0.023399	0.0073567	0.0014696	9	0.50452	-0.023399	0.0073567	0.0014696	9	0.50452	0	0.0375457
ApoA	ENSG00000186074	CD300LF	-0.030917	0.0076878	5.7825e-05	12	0.20595	-0.030917	0.0076878	5.7825e-05	12	0.20595	0	0.0033435
ApoA	ENSG00000186188	FFAR4	-0.039078	0.0099738	8.9262e-05	6	0.87854	-0.039078	0.0099738	8.9262e-05	6	0.87854	0	0.00471263
ApoA	ENSG00000186792	HYAL3	0.015015	0.0042638	0.0004289	34	0.00023767	0.014087	0.0036958	0.00013806	29	0.058983	5	0.00662166
ApoA	ENSG00000187010	RHD	-0.010827	0.0027314	7.3672e-05	36	0.29462	-0.010827	0.0027314	7.3672e-05	36	0.29462	0	0.00405286
ApoA	ENSG00000187116	LILRA5	-0.043226	0.017053	0.011249	6	0.00026647	-0.05069	0.014607	0.00051984	3	0.049662	3	0.0179254
ApoA	ENSG00000187145	MRPS21	0.020004	0.0089621	0.02561	12	0.00044752	0.022435	0.0064891	0.00054547	11	0.1037	1	0.0185854
ApoA	ENSG00000187860	CCDC157	0.075079	0.03505	0.03219	4	0.033961	0.091897	0.017678	2.0106e-07	3	0.63191	1	3.00832e-05
ApoA	ENSG00000188313	PLSCR1	0.015775	0.0051052	0.0020011	11	0.58298	0.015775	0.0051052	0.0020011	11	0.58298	0	0.0463245
ApoA	ENSG00000188315	C3orf62	0.10637	0.036654	0.0037066	6	0.025247	0.1514	0.016215	9.9175e-21	5	0.54566	1	1.4066e-17
ApoA	ENSG00000188486	H2AFX	0.08424	0.024648	0.00063154	3	0.48894	0.08424	0.024648	0.00063154	3	0.48894	0	0.0206372
ApoA	ENSG00000188707	C7orf29	0.017964	0.0066662	0.0070444	15	0.046016	0.019371	0.0050329	0.00011871	14	0.5751	1	0.00587358
ApoA	ENSG00000189306	RRP7A	0.0084855	0.0042126	0.043973	39	0.00062964	0.012469	0.0037316	0.00083376	36	0.053315	3	0.0251575
ApoA	ENSG00000196167	C11orf92	0.028676	0.0067875	2.3917e-05	8	0.87613	0.028676	0.0067875	2.3917e-05	8	0.87613	0	0.00166265
ApoA	ENSG00000196189	SEMA4A	-0.018598	0.0056455	0.00098657	28	0.018583	-0.022022	0.005374	4.1695e-05	27	0.083246	1	0.00258862
ApoA	ENSG00000196465	MYL6B	-0.064325	0.014102	5.0789e-06	3	0.62202	-0.064325	0.014102	5.0789e-06	3	0.62202	0	0.000465319
ApoA	ENSG00000196704	AMZ2	0.022155	0.0060327	0.00024021	6	0.31469	0.022155	0.0060327	0.00024021	6	0.31469	0	0.0101221
ApoA	ENSG00000196712	NF1	-0.038963	0.023178	0.092754	5	0.0066421	-0.065158	0.012824	3.7558e-07	3	0.34589	2	5.13012e-05
ApoA	ENSG00000196821	C6orf106	-0.066532	0.012532	1.1021e-07	13	0.00011783	-0.070317	0.0092044	2.181e-14	12	0.059141	1	1.43196e-11
ApoA	ENSG00000196911	KPNA5	-0.065302	0.01717	0.00014281	3	0.54824	-0.065302	0.01717	0.00014281	3	0.54824	0	0.00679004
ApoA	ENSG00000196967	ZNF585A	0.073203	0.016523	9.4088e-06	5	0.48288	0.073203	0.016523	9.4088e-06	5	0.48288	0	0.000772011
ApoA	ENSG00000197114	ZGPAT	-0.039145	0.01117	0.00045773	4	0.91605	-0.039145	0.01117	0.00045773	4	0.91605	0	0.0163012
ApoA	ENSG00000197142	ACSL5	0.019981	0.0092567	0.030884	23	1.7306e-10	0.018424	0.0059051	0.0018086	19	0.058377	4	0.0432883
ApoA	ENSG00000197165	SULT1A2	-0.018481	0.0053489	0.00055003	11	0.17857	-0.018481	0.0053489	0.00055003	11	0.17857	0	0.0186928
ApoA	ENSG00000197256	KANK2	0.0035946	0.068553	0.95818	5	0.0026579	0.080803	0.017531	4.0459e-06	3	0.84141	2	0.000383422
ApoA	ENSG00000197345	MRPL21	0.02287	0.0031172	2.1862e-13	38	0.072999	0.02287	0.0031172	2.1862e-13	38	0.072999	0	1.20974e-10
ApoA	ENSG00000197728	RPS26	0.018873	0.0050887	0.00020825	18	0.3371	0.018873	0.0050887	0.00020825	18	0.3371	0	0.00906097
ApoA	ENSG00000197774	EME2	0.038628	0.012622	0.0022113	5	0.73826	0.038628	0.012622	0.0022113	5	0.73826	0	0.0494319
ApoA	ENSG00000197846	HIST1H2BF	-0.040812	0.017214	0.017746	5	0.043036	-0.044572	0.013935	0.0013814	4	0.20194	1	0.0359782
ApoA	ENSG00000198156	A-575C2.4	-0.037444	0.010506	0.00036504	3	0.57248	-0.037444	0.010506	0.00036504	3	0.57248	0	0.0138135
ApoA	ENSG00000198208	RPS6KL1	-0.060688	0.017368	0.0004754	3	0.15285	-0.060688	0.017368	0.0004754	3	0.15285	0	0.0168015
ApoA	ENSG00000198663	C6orf89	0.061984	0.016281	0.00014051	3	0.68117	0.061984	0.016281	0.00014051	3	0.68117	0	0.00671236
ApoA	ENSG00000198792	TMEM184B	-0.029252	0.010244	0.0042962	12	0.048974	-0.039509	0.0091951	1.7333e-05	11	0.20711	1	0.00128337
ApoA	ENSG00000198805	PNP	-0.021831	0.0070695	0.0020145	14	0.56124	-0.021831	0.0070695	0.0020145	14	0.56124	0	0.0465315
ApoA	ENSG00000198890	PRMT6	0.020797	0.0038257	5.4439e-08	30	0.311	0.020797	0.0038257	5.4439e-08	30	0.311	0	9.66896e-06
ApoA	ENSG00000198937	CCDC167	0.017476	0.0040271	1.4275e-05	39	0.017629	0.016821	0.0037689	8.0793e-06	38	0.082807	1	0.00068066
ApoA	ENSG00000204110	RP1-153P14.8	-0.012708	0.002746	3.6951e-06	23	0.079309	-0.012708	0.002746	3.6951e-06	23	0.079309	0	0.000355014
ApoA	ENSG00000204160	ZDHHC18	-0.050215	0.011883	2.3812e-05	11	0.0068444	-0.059976	0.0092657	9.6145e-11	9	0.15055	2	3.31649e-08
ApoA	ENSG00000204219	TCEA3	0.030926	0.009412	0.001017	8	0.052604	0.030926	0.009412	0.001017	8	0.052604	0	0.0290314
ApoA	ENSG00000204650	CRHR1-IT1	-0.013194	0.0033152	6.8935e-05	24	0.12322	-0.013194	0.0033152	6.8935e-05	24	0.12322	0	0.00384806
ApoA	ENSG00000204710	SPDYC	0.028386	0.0076186	0.00019459	19	1.3146e-05	0.026291	0.0055674	2.3315e-06	17	0.061159	2	0.000241045
ApoA	ENSG00000204839	MROH6	0.012809	0.008688	0.14039	19	4.8517e-14	0.015876	0.0049101	0.0012233	16	0.058938	3	0.033152
ApoA	ENSG00000204991	SPIRE2	0.017053	0.0049365	0.00055152	16	0.38697	0.017053	0.0049365	0.00055152	16	0.38697	0	0.0187303
ApoA	ENSG00000205464	ATP6AP1L	-0.017225	0.0043557	7.6638e-05	32	0.08377	-0.017225	0.0043557	7.6638e-05	32	0.08377	0	0.00417443
ApoA	ENSG00000205609	EIF3CL	-0.013294	0.0037644	0.00041318	11	0.35909	-0.013294	0.0037644	0.00041318	11	0.35909	0	0.0151402
ApoA	ENSG00000206561	COLQ	-0.032564	0.0087365	0.00019354	19	0.026934	-0.035201	0.0083452	2.4641e-05	18	0.068065	1	0.00170406
ApoA	ENSG00000211688	TRGJP2	0.016297	0.010011	0.10354	4	0.013416	0.019297	0.0049705	0.00010346	3	0.47164	1	0.00528091
ApoA	ENSG00000213057	C1orf220	0.052873	0.023248	0.02295	4	0.017026	0.04701	0.012662	0.00020518	3	0.35697	1	0.00896611
ApoA	ENSG00000213366	GSTM2	-0.0304	0.0088045	0.00055477	28	0	-0.025814	0.0046296	2.4644e-08	23	0.070843	5	4.84864e-06
ApoA	ENSG00000213398	LCAT	0.086571	0.025129	0.00057089	14	4.3368e-06	0.16219	0.014363	1.4287e-29	10	0.12762	4	4.39393e-26
ApoA	ENSG00000213445	SIPA1	-0.061715	0.032812	0.05999	4	0.015178	-0.073741	0.023833	0.0019743	3	0.18371	1	0.0459061
ApoA	ENSG00000213533	TMEM110	0.039631	0.013885	0.0043149	10	0.024025	0.047412	0.011765	5.5828e-05	9	0.13306	1	0.00325574
ApoA	ENSG00000213639	PPP1CB	-0.015193	0.0054552	0.005352	24	0.023073	-0.015838	0.0051008	0.0019027	23	0.077319	1	0.044787
ApoA	ENSG00000213689	TREX1	0.021007	0.009516	0.027274	11	0.0034406	0.023709	0.0071728	0.0009483	10	0.15002	1	0.0276098
ApoA	ENSG00000213903	LTB4R	0.069732	0.021995	0.0015229	4	0.19976	0.069732	0.021995	0.0015229	4	0.19976	0	0.0384693
ApoA	ENSG00000214022	REPIN1	-0.032061	0.0095111	0.00074907	5	0.5858	-0.032061	0.0095111	0.00074907	5	0.5858	0	0.0233197
ApoA	ENSG00000214401	KANSL1-AS1	-0.0082273	0.0020863	8.0322e-05	20	0.49158	-0.0082273	0.0020863	8.0322e-05	20	0.49158	0	0.00434024
ApoA	ENSG00000214413	BBIP1	-0.032531	0.0096161	0.00071697	4	0.43926	-0.032531	0.0096161	0.00071697	4	0.43926	0	0.0226168
ApoA	ENSG00000214425	LRRC37A4P	0.0092675	0.0023466	7.8378e-05	12	0.62209	0.0092675	0.0023466	7.8378e-05	12	0.62209	0	0.00425882
ApoA	ENSG00000214719	AC005562.1	0.070654	0.013992	4.425e-07	4	0.50378	0.070654	0.013992	4.425e-07	4	0.50378	0	5.91661e-05
ApoA	ENSG00000214941	ZSWIM7	-0.010569	0.0031321	0.0007399	32	0.10653	-0.010569	0.0031321	0.0007399	32	0.10653	0	0.0231081
ApoA	ENSG00000216775	RP1-152L7.5	-0.027573	0.0089736	0.0021214	4	0.73877	-0.027573	0.0089736	0.0021214	4	0.73877	0	0.04811
ApoA	ENSG00000217075	AC007401.2	0.028978	0.0064983	8.2203e-06	3	0.53342	0.028978	0.0064983	8.2203e-06	3	0.53342	0	0.000690945
ApoA	ENSG00000221866	PLXNA4	0.048921	0.014811	0.00095674	5	0.37827	0.048921	0.014811	0.00095674	5	0.37827	0	0.0278002
ApoA	ENSG00000221962	TMEM14E	-0.10136	0.019256	1.4131e-07	6	0.83212	-0.10136	0.019256	1.4131e-07	6	0.83212	0	2.21732e-05
ApoA	ENSG00000222020	AC062017.1	0.028549	0.0091812	0.0018743	9	0.32118	0.028549	0.0091812	0.0018743	9	0.32118	0	0.0443376
ApoA	ENSG00000223705	NSUN5P1	-0.030828	0.010025	0.0021049	4	0.82377	-0.030828	0.010025	0.0021049	4	0.82377	0	0.0478926
ApoA	ENSG00000224875	AC083949.1	0.027292	0.0064802	2.5359e-05	3	0.79264	0.027292	0.0064802	2.5359e-05	3	0.79264	0	0.00174374
ApoA	ENSG00000225101	OR52K3P	-0.0072598	0.0022964	0.0015698	22	0.53665	-0.0072598	0.0022964	0.0015698	22	0.53665	0	0.0393411
ApoA	ENSG00000226334	RP11-217B7.2	-0.010374	0.019088	0.58679	6	1.9226e-08	-0.023051	0.0072668	0.0015131	4	0.13266	2	0.038312
ApoA	ENSG00000226450	CYP2D8P1	0.019308	0.0054803	0.00042649	5	0.408	0.019308	0.0054803	0.00042649	5	0.408	0	0.0154911
ApoA	ENSG00000226752	RP11-27I1.2	0.005872	0.0018073	0.0011578	57	0.39241	0.005872	0.0018073	0.0011578	57	0.39241	0	0.0318916
ApoA	ENSG00000226806	AC011893.3	0.023656	0.0049078	1.4349e-06	9	0.0035335	0.020585	0.0036537	1.761e-08	7	0.17004	2	3.57052e-06
ApoA	ENSG00000227242	RP11-325P15.3	-0.0093845	0.0027973	0.000794	23	0.83675	-0.0093845	0.0027973	0.000794	23	0.83675	0	0.0242888
ApoA	ENSG00000227920	RP1-153P14.5	-0.013926	0.0029092	1.695e-06	23	0.036434	-0.013238	0.0026719	7.2584e-07	22	0.14134	1	8.99358e-05
ApoA	ENSG00000229320	KRT8P12	-0.025556	0.004987	2.9842e-07	7	0.73559	-0.025556	0.004987	2.9842e-07	7	0.73559	0	4.21816e-05
[truncated: 11,142 more rows]

## Sheet: SF1f
Gene	Metabolite	Phenotype	alpha_TRANSCRIPT_MET	P_TRANSCRIPT_MET	alpha_MET_PHENO	P_MET_PHENO	alpha_TRANSCRIPT_PHENO	P_TRANSCRIPT_PHENO	direct_effect	indirect_effect	PubMed_PHENO	PubMed
AC011893.3	1,5-anhydroglucitol(1,5-AG)	albumin	-0.18555	1.29e-18	-0.023968	0.0044076	0.0062285	0.069334	0.0061	-0.01035
AC011893.3	1,5-anhydroglucitol(1,5-AG)	ALT	-0.18555	1.29e-18	0.023166	0.0040354	-0.0085168	0.00183	-0.00855	0.00943
AC011893.3	1,5-anhydroglucitol(1,5-AG)	BMI	-0.18555	1.29e-18	0.042792	5.56e-08	-0.014263	5.52e-05	-0.01244	0.02929
AC011893.3	1,5-anhydroglucitol(1,5-AG)	diastolic_BP	-0.18555	1.29e-18	0.036379	7.35e-06	-0.0083275	0.0020355	-0.0081	0.01797
AC011893.3	1,5-anhydroglucitol(1,5-AG)	heart_rate	-0.18555	1.29e-18	0.036181	8.01e-06	-0.0099913	0.0046062	-0.00985	0.01165
AC011893.3	1,5-anhydroglucitol(1,5-AG)	phosphate	-0.18555	1.29e-18	-0.032684	0.00050517	0.0033081	0.26505	0.00299	-0.02565
AC011893.3	1,5-anhydroglucitol(1,5-AG)	systolic_BP	-0.18555	1.29e-18	0.036974	0.0022351	-0.0051033	0.12032	-0.00481	0.02371
AC011893.3	1,5-anhydroglucitol(1,5-AG)	urate	-0.18555	1.29e-18	0.045885	0.00028239	-0.015195	8.15e-05	-0.0135	0.04475
AC092653.5	N-acetylornithine	AST	-0.50233	1.4e-12	-0.012141	0.0027146	0.014847	0.0035622	0.00706	-0.01758
AC092653.5	N-acetylornithine	Cr	-0.50233	1.4e-12	0.060953	2.29e-51	-0.048943	3.68e-11	0.00646	0.11511
AC092653.5	N-acetylornithine	cystatinC	-0.50233	1.4e-12	0.039368	2.03e-22	-0.030911	3.75e-07	0.00727	0.08217
AC092653.5	N-acetylornithine	diastolic_BP	-0.50233	1.4e-12	-0.018316	6.65e-06	0.020266	0.0035478	0.00099	-0.04168
AC092653.5	N-acetylornithine	GGT	-0.50233	1.4e-12	-0.0159	8.39e-05	0.013561	0.011656	-0.00175	-0.03387
AC092653.5	N-acetylornithine	urea	-0.50233	1.4e-12	0.012511	0.0019728	-0.018363	0.00093875	-0.03126	-0.0266
ANKH	citrate	Ca	-0.30099	2.23e-06	0.067568	6.47e-10	-0.01519	0.034513	-0.01177	0.06812	calcium	35434452;35269745;35203651;33966713;33748234;33463757;32366894;32194056;29578045;28844316;28567149;27586801;27142968;27032788;26820766;26626724;26599446;24467728;24461675;22703652;22647861;22227878;22198832;21102543;20646567;20499338;20353559;19398486;19369455;19088867;17563703;17403715;17278931;17278928;17067391;17043047;16903811;16582687;15951203;15474392;15474385;15134602;14991274;13130483;127…
APH1B	succinylcarnitine	ApoA	-0.67225	1.15e-06	-0.0338	0.00022758	-0.0033031	0.58975	0.0043	-0.02169
APH1B	succinylcarnitine	BMI	-0.67225	1.15e-06	0.016695	0.0045599	-0.0050906	0.28052	-0.00545	0.02297
APH1B	succinylcarnitine	Cr	-0.67225	1.15e-06	0.040558	2.76e-05	-0.01313	0.0016251	-0.01073	0.02903
APH1B	succinylcarnitine	systolic_BP	-0.67225	1.15e-06	0.028928	0.0006838	-0.0018093	0.71265	-0.00391	0.00762
APH1B	succinylcarnitine	urate	-0.67225	1.15e-06	0.024787	0.0024402	-0.0089712	0.036428	-0.00828	0.0189
APH1B	succinylcarnitine	urea	-0.67225	1.15e-06	0.021272	0.0047317	-0.0053572	0.29433	0.00043	0.01212
CCT6A	serine	ApoA	-0.45697	1.63e-11	0.031674	0.0032582	-0.01182	0.082731	-0.01182	-0.03805
CCT6A	serine	CRP	-0.45697	1.63e-11	-0.049854	7.41e-09	0.052785	1.99e-08	0.02254	-0.04429
CCT6A	serine	cystatinC	-0.45697	1.63e-11	-0.056428	0.0045932	0.0071658	0.27027	0.00717	-0.1063
CPT2	glutaroylcarnitine	BMI	0.8382	1.26e-26	0.027096	0.00027869	0.0074397	0.64892	-0.00215	0.01403
CPT2	glutaroylcarnitine	Cr	0.8382	1.26e-26	0.059399	3.24e-06	-0.011712	0.50781	-0.00433	-0.00563
CPT2	glutaroylcarnitine	diastolic_BP	0.8382	1.26e-26	0.025602	3.74e-06	0.010342	0.46547	-0.0129	0.0273
CPT2	glutaroylcarnitine	total_protein	0.8382	1.26e-26	0.020308	0.0019684	0.0025686	0.82485	-0.03389	0.04034
CRAT	succinylcarnitine	ApoA	0.33156	1.23e-06	-0.0338	0.00022758	-0.0068383	0.18281	-0.00734	-0.02764	ApoA | apolipoprotein A
CRAT	succinylcarnitine	BMI	0.33156	1.23e-06	0.016695	0.0045599	0.0041597	0.39081	0.00257	0.01839	BMI | body mass index
CRAT	succinylcarnitine	Cr	0.33156	1.23e-06	0.040558	2.76e-05	-0.012318	0.01181	-0.01242	0.04056	Cr | creatinine
CRAT	succinylcarnitine	systolic_BP	0.33156	1.23e-06	0.028928	0.0006838	0.0094363	0.026298	0.00993	0.02215	pressure	32660330;30728084
CRAT	succinylcarnitine	urate	0.33156	1.23e-06	0.024787	0.0024402	0.0049902	0.2174	0.00535	0.02394	urate | uric acid
CRAT	succinylcarnitine	urea	0.33156	1.23e-06	0.021272	0.0047317	-0.0013808	0.75604	-0.00206	0.01972	urea
CRIP3	carnitine	FVC	0.48598	1.39e-08	-0.029245	2.67e-05	-0.039078	0.0039849	-0.03459	-0.01209
DARS	1,5-anhydroglucitol(1,5-AG)	albumin	-0.23539	8.91e-10	-0.023968	0.0044076	0.005275	0.29237	0.00442	-0.01651
DARS	1,5-anhydroglucitol(1,5-AG)	ALT	-0.23539	8.91e-10	0.023166	0.0040354	-0.0084325	0.10567	-0.00748	-0.00286
DARS	1,5-anhydroglucitol(1,5-AG)	BMI	-0.23539	8.91e-10	0.042792	5.56e-08	-0.010354	0.038716	-0.00994	0.01875
DARS	1,5-anhydroglucitol(1,5-AG)	diastolic_BP	-0.23539	8.91e-10	0.036379	7.35e-06	-0.017428	0.00019361	-0.01704	0.01463
DARS	1,5-anhydroglucitol(1,5-AG)	heart_rate	-0.23539	8.91e-10	0.036181	8.01e-06	-0.01637	0.0011232	-0.01618	0.00397
DARS	1,5-anhydroglucitol(1,5-AG)	phosphate	-0.23539	8.91e-10	-0.032684	0.00050517	0.0053253	0.20895	0.00222	-0.02564
DARS	1,5-anhydroglucitol(1,5-AG)	systolic_BP	-0.23539	8.91e-10	0.036974	0.0022351	-0.012378	0.01016	-0.01117	0.01823
DARS	1,5-anhydroglucitol(1,5-AG)	urate	-0.23539	8.91e-10	0.045885	0.00028239	-0.0181	0.00053826	-0.01641	0.01866
DISP2	isovalerylcarnitine	Cr	-0.45703	1.85e-06	-0.086672	1.58e-20	0.00073157	0.9405	-0.01727	-0.07396
DISP2	isovalerylcarnitine	CRP	-0.45703	1.85e-06	-0.028489	0.00018924	0.0018485	0.84734	-0.00362	-0.04913
DISP2	isovalerylcarnitine	IGF1	-0.45703	1.85e-06	0.04387	0.00019353	0.014686	0.14828	0.01943	0.04852
DISP2	isovalerylcarnitine	phosphate	-0.45703	1.85e-06	0.081268	2.33e-09	0.014151	0.15798	0.01975	0.07776
DISP2	isovalerylcarnitine	urate	-0.45703	1.85e-06	-0.079028	8.77e-09	0.0012355	0.91201	-0.01057	-0.07058
DPEP2	glutaroylcarnitine	BMI	0.48554	2.36e-12	0.027096	0.00027869	0.0014504	0.79613	-0.0012	0.00502
DPEP2	glutaroylcarnitine	Cr	0.48554	2.36e-12	0.059399	3.24e-06	-0.0043701	0.38848	0.00373	-0.03115
DPEP2	glutaroylcarnitine	diastolic_BP	0.48554	2.36e-12	0.025602	3.74e-06	0.010117	0.077322	0.00843	0.02307
DPEP2	glutaroylcarnitine	total_protein	0.48554	2.36e-12	0.020308	0.0019684	-0.016338	0.0039198	-0.01463	0.03884
DUSP22	gamma-glutamyltyrosine	Cr	-1.0157	2.29e-06	-0.055565	0.00024245	-0.068468	0.06532	-0.07874	-0.02208
DUSP22	gamma-glutamyltyrosine	glucose	-1.0157	2.29e-06	-0.034342	0.0039566	-0.020926	0.48577	-0.03659	-0.03367
FADS1	1-arachidonoylglycerophosphocholine*	albumin	-0.3855	4.61e-15	-0.025337	0.002829	0.015816	0.052005	0.018	-0.0073
FADS1	1-arachidonoylglycerophosphocholine*	ALP	-0.3855	4.61e-15	-0.11915	0.00033076	0.03805	0.0002864	0.10707	0.01595
FADS1	1-arachidonoylglycerophosphocholine*	ApoA	-0.3855	4.61e-15	0.10006	4.66e-07	-0.050563	2.18e-05	-0.08654	0.00173
FADS1	1-arachidonoylglycerophosphocholine*	bilirubin	-0.3855	4.61e-15	0.051955	1.72e-06	-0.0045615	0.66332	-0.04173	0.01508
FADS1	1-arachidonoylglycerophosphocholine*	Ca	-0.3855	4.61e-15	0.019796	0.0030936	-0.014272	0.061055	-0.01307	0.00491
FADS1	1-arachidonoylglycerophosphocholine*	CRP	-0.3855	4.61e-15	0.029637	8.67e-05	-0.023751	0.00041671	-0.02432	0.05415
FADS1	1-arachidonoylglycerophosphocholine*	cystatinC	-0.3855	4.61e-15	0.055105	6.42e-17	-0.04579	1.41e-09	-0.04495	0.01317
FADS1	1-arachidonoylglycerophosphocholine*	glucose	-0.3855	4.61e-15	0.046972	0.0014396	-0.046122	1.99e-09	-0.04378	-0.02073
FADS1	1-arachidonoylglycerophosphocholine*	HbA1c	-0.3855	4.61e-15	0.060023	2.87e-12	-0.057248	2.61e-14	-0.05493	0.03485
FADS1	1-arachidonoylglycerophosphocholine*	height	-0.3855	4.61e-15	0.050984	0.00042124	-0.042967	1.26e-06	-0.0421	0.0523
FADS1	1-arachidonoylglycerophosphocholine*	IGF1	-0.3855	4.61e-15	0.057321	8.85e-07	-0.016254	0.11751	-0.04644	0.04417
FADS1	1-arachidonoylglycerophosphocholine*	testosterone	-0.3855	4.61e-15	0.033329	0.00014932	-0.032484	5.12e-08	-0.03144	-0.01795
FADS1	1-arachidonoylglycerophosphocholine*	total_protein	-0.3855	4.61e-15	-0.084516	0.0018863	0.045076	2.5e-06	0.08213	0.02337
FADS1	1-arachidonoylglycerophosphoethanolamine*	ALT	-0.29855	1.4e-07	0.048944	0.0046426	-0.034274	1.8e-06	-0.03273	0.03155
FADS1	1-arachidonoylglycerophosphoethanolamine*	ApoA	-0.29855	1.4e-07	0.12582	0.0040543	-0.050563	2.18e-05	-0.08654	0.37915
FADS1	1-arachidonoylglycerophosphoethanolamine*	CRP	-0.29855	1.4e-07	0.032269	0.00020762	-0.023751	0.00041671	-0.02432	0.05524
FADS1	1-arachidonoylglycerophosphoethanolamine*	diastolic_BP	-0.29855	1.4e-07	-0.026892	0.0013071	0.019883	0.00054283	0.02136	-0.01065
FADS1	1-arachidonoylglycerophosphoethanolamine*	heart_rate	-0.29855	1.4e-07	-0.11597	0.00015275	0.020072	0.024195	0.06719	-0.02521
FADS1	1-arachidonoylglycerophosphoethanolamine*	IGF1	-0.29855	1.4e-07	-0.045642	0.0002071	-0.016254	0.11751	-0.04644	-0.04564
FADS1	1-arachidonoylglycerophosphoethanolamine*	total_protein	-0.29855	1.4e-07	-0.12361	3.82e-05	0.045076	2.5e-06	0.08213	-0.05034
FADS1	1-arachidonoylglycerophosphoethanolamine*	urate	-0.29855	1.4e-07	-0.070277	1.61e-06	0.042653	5.96e-08	0.03117	-0.06339
FADS2	1-arachidonoylglycerophosphocholine*	albumin	-0.62934	5.13e-62	-0.025337	0.002829	-0.00032314	0.94478	-0.00294	-0.01668
FADS2	1-arachidonoylglycerophosphocholine*	ALP	-0.62934	5.13e-62	-0.11915	0.00033076	0.03357	8.64e-09	0.04117	-0.02922
FADS2	1-arachidonoylglycerophosphocholine*	ApoA	-0.62934	5.13e-62	0.10006	4.66e-07	-0.037247	1.21e-15	-0.03481	0.02344
FADS2	1-arachidonoylglycerophosphocholine*	bilirubin	-0.62934	5.13e-62	0.051955	1.72e-06	-0.01742	3.35e-05	-0.01309	0.02772
FADS2	1-arachidonoylglycerophosphocholine*	Ca	-0.62934	5.13e-62	0.019796	0.0030936	-0.0084299	0.035853	-0.01058	-0.00151
FADS2	1-arachidonoylglycerophosphocholine*	CRP	-0.62934	5.13e-62	0.029637	8.67e-05	-0.0075835	0.084751	-0.0069	0.02369
FADS2	1-arachidonoylglycerophosphocholine*	cystatinC	-0.62934	5.13e-62	0.055105	6.42e-17	-0.019019	1.14e-07	-0.01756	0.01706
FADS2	1-arachidonoylglycerophosphocholine*	glucose	-0.62934	5.13e-62	0.046972	0.0014396	-0.016476	0.00062325	-0.01564	0.01156
FADS2	1-arachidonoylglycerophosphocholine*	HbA1c	-0.62934	5.13e-62	0.060023	2.87e-12	-0.023625	3.71e-07	-0.00896	0.04675
FADS2	1-arachidonoylglycerophosphocholine*	height	-0.62934	5.13e-62	0.050984	0.00042124	-0.010864	0.041141	-0.00203	0.04399
FADS2	1-arachidonoylglycerophosphocholine*	IGF1	-0.62934	5.13e-62	0.057321	8.85e-07	-0.017651	4.92e-05	-0.01051	0.04668
FADS2	1-arachidonoylglycerophosphocholine*	testosterone	-0.62934	5.13e-62	0.033329	0.00014932	-0.015631	3.04e-05	-0.01631	-0.0071
FADS2	1-arachidonoylglycerophosphocholine*	total_protein	-0.62934	5.13e-62	-0.084516	0.0018863	0.033897	9.95e-12	0.03273	-0.01913
FADS2	1-arachidonoylglycerophosphoethanolamine*	ALT	-0.37419	1.19e-18	0.048944	0.0046426	-0.011995	0.0053997	-0.01252	0.02274
FADS2	1-arachidonoylglycerophosphoethanolamine*	ApoA	-0.37419	1.19e-18	0.12582	0.0040543	-0.037247	1.21e-15	0.00359	0.29541
FADS2	1-arachidonoylglycerophosphoethanolamine*	CRP	-0.37419	1.19e-18	0.032269	0.00020762	-0.0075835	0.084751	-0.00619	0.03558
FADS2	1-arachidonoylglycerophosphoethanolamine*	diastolic_BP	-0.37419	1.19e-18	-0.026892	0.0013071	0.0065589	0.078426	0.00543	-0.01268
FADS2	1-arachidonoylglycerophosphoethanolamine*	heart_rate	-0.37419	1.19e-18	-0.11597	0.00015275	0.031767	9.65e-12	0.02886	-0.03237
FADS2	1-arachidonoylglycerophosphoethanolamine*	IGF1	-0.37419	1.19e-18	-0.045642	0.0002071	-0.017651	4.92e-05	-0.02179	-0.01749
FADS2	1-arachidonoylglycerophosphoethanolamine*	total_protein	-0.37419	1.19e-18	-0.12361	3.82e-05	0.033897	9.95e-12	0.02755	-0.06053
FADS2	1-arachidonoylglycerophosphoethanolamine*	urate	-0.37419	1.19e-18	-0.070277	1.61e-06	0.010671	0.051036	0.00799	-0.0691
FADS2	1-arachidonoylglycerophosphoinositol*	albumin	-0.27559	6.38e-16	-0.038234	0.0020217	-0.00032314	0.94478	-0.00334	-0.03268
GCDH	glutaroylcarnitine	BMI	-0.46743	1.3e-11	0.027096	0.00027869	-0.010876	0.079294	-0.01074	0.01396	BMI | body mass index	33965309
GCDH	glutaroylcarnitine	Cr	-0.46743	1.3e-11	0.059399	3.24e-06	-0.016723	0.016711	-0.01786	-0.0212	Cr | creatinine	25277297
GCDH	glutaroylcarnitine	diastolic_BP	-0.46743	1.3e-11	0.025602	3.74e-06	-0.0072181	0.23583	-0.01074	0.02669	pressure
GCDH	glutaroylcarnitine	total_protein	-0.46743	1.3e-11	0.020308	0.0019684	-0.010518	0.12652	-0.01018	0.03377	total protein
GSTM1	3-dehydrocarnitine*	ApoA	0.15714	3.59e-09	-0.031411	0.0033871	-0.020523	1.22e-09	-0.02388	-0.05927
GSTM1	3-dehydrocarnitine*	bilirubin	0.15714	3.59e-09	-0.050184	0.00025177	-0.0097513	0.00053129	-0.009	-0.0513
GSTM1	3-dehydrocarnitine*	Cr	0.15714	3.59e-09	-0.087694	5.23e-15	-0.0020763	0.46876	-0.00265	-0.0346
GSTM1	3-dehydrocarnitine*	SHBG	0.15714	3.59e-09	0.045309	0.00042547	0.018133	3.99e-09	0.01675	0.03248
HPD	2-hydroxyisobutyrate	CRP	-0.31511	1.89e-17	-0.035103	0.0022709	0.0064458	0.2066	0.00852	-0.04248
HPD	2-hydroxyisobutyrate	cystatinC	-0.31511	1.89e-17	0.040849	0.00037693	0.013995	0.010265	0.00659	0.04278
HPD	2-hydroxyisobutyrate	urea	-0.31511	1.89e-17	0.038544	0.00079635	0.0065083	0.15878	0.00335	0.03708
JMY	betaine	ALP	0.2901	1.09e-07	-0.048939	2.96e-06	-0.02664	0.00010424	-0.02684	0.01522
JMY	betaine	BMI	0.2901	1.09e-07	-0.042621	0.0040244	-0.013371	0.048169	-0.00668	-0.03513
JMY	betaine	Cr	0.2901	1.09e-07	-0.056042	1.66e-07	-0.01716	0.034205	0.00897	-0.13732
JMY	betaine	GGT	0.2901	1.09e-07	-0.059857	0.0025815	-0.026004	9.07e-05	-0.02631	0.00161
JMY	betaine	height	0.2901	1.09e-07	-0.06909	4.86e-09	-0.0077861	0.48372	-0.00325	-0.02141
KANSL1-AS1	glutaroylcarnitine	BMI	-0.062035	2.64e-06	0.027096	0.00027869	-0.00032186	0.88495	-0.00014	0.01303
KANSL1-AS1	glutaroylcarnitine	Cr	-0.062035	2.64e-06	0.059399	3.24e-06	-0.0023758	0.29928	-0.0026	-0.00574
KANSL1-AS1	glutaroylcarnitine	diastolic_BP	-0.062035	2.64e-06	0.025602	3.74e-06	-0.0067297	0.0056956	-0.00686	0.0256
KANSL1-AS1	glutaroylcarnitine	total_protein	-0.062035	2.64e-06	0.020308	0.0019684	-0.025319	4.11e-21	-0.01973	0.03331
KNSTRN	isovalerylcarnitine	Cr	0.17562	9.02e-10	-0.086672	1.58e-20	-0.00506	0.19105	0.00201	-0.06745
KNSTRN	isovalerylcarnitine	CRP	0.17562	9.02e-10	-0.028489	0.00018924	0.0037352	0.35433	0.00832	-0.04584
KNSTRN	isovalerylcarnitine	IGF1	0.17562	9.02e-10	0.04387	0.00019353	0.00022509	0.95231	-0.00489	0.04772
KNSTRN	isovalerylcarnitine	phosphate	0.17562	9.02e-10	0.081268	2.33e-09	-0.0019441	0.61494	-0.01486	0.08167
KNSTRN	isovalerylcarnitine	urate	0.17562	9.02e-10	-0.079028	8.77e-09	0.0041152	0.27744	0.01333	-0.07308
LRRC6	carnitine	FVC	-0.12435	2.71e-06	-0.029245	2.67e-05	-0.0023347	0.33682	-0.00204	-0.01339
MCM6	1,5-anhydroglucitol(1,5-AG)	albumin	-0.44146	3.82e-23	-0.023968	0.0044076	0.016966	0.00034195	0.01826	0.0011	albumin
MCM6	1,5-anhydroglucitol(1,5-AG)	ALT	-0.44146	3.82e-23	0.023166	0.0040354	-0.0083282	0.081535	-0.00626	0.01758	ALT | alanine aminotransferase
MCM6	1,5-anhydroglucitol(1,5-AG)	BMI	-0.44146	3.82e-23	0.042792	5.56e-08	-0.022638	9.89e-06	-0.01887	0.03761	BMI | body mass index	28285768;28225053;24694335;22233423
MCM6	1,5-anhydroglucitol(1,5-AG)	diastolic_BP	-0.44146	3.82e-23	0.036379	7.35e-06	-0.012961	0.014041	-0.00781	0.03348	pressure	28285768;25259444
MCM6	1,5-anhydroglucitol(1,5-AG)	heart_rate	-0.44146	3.82e-23	0.036181	8.01e-06	-0.021445	0.00027085	-0.01839	0.01762	heart rate | pulse	25259444
MCM6	1,5-anhydroglucitol(1,5-AG)	phosphate	-0.44146	3.82e-23	-0.032684	0.00050517	0.011352	0.038809	0.00971	-0.01615	phosphate
MCM6	1,5-anhydroglucitol(1,5-AG)	systolic_BP	-0.44146	3.82e-23	0.036974	0.0022351	-0.007198	0.16909	-0.00105	0.03639	pressure	28285768;25259444
MCM6	1,5-anhydroglucitol(1,5-AG)	urate	-0.44146	3.82e-23	0.045885	0.00028239	-0.02818	1.3e-07	-0.02426	0.02263	urate | uric acid
MMEL1	1-arachidonoylglycerophosphoethanolamine*	ALT	-0.15548	9.55e-07	0.048944	0.0046426	-0.0056393	0.28194	-0.00201	0.03733
MMEL1	1-arachidonoylglycerophosphoethanolamine*	ApoA	-0.15548	9.55e-07	0.12582	0.0040543	0.0018342	0.70217	0.02685	0.25699
MMEL1	1-arachidonoylglycerophosphoethanolamine*	CRP	-0.15548	9.55e-07	0.032269	0.00020762	-0.0083448	0.039452	-0.00404	0.04425
MMEL1	1-arachidonoylglycerophosphoethanolamine*	diastolic_BP	-0.15548	9.55e-07	-0.026892	0.0013071	0.00097312	0.82018	-0.00167	-0.02718
MMEL1	1-arachidonoylglycerophosphoethanolamine*	heart_rate	-0.15548	9.55e-07	-0.11597	0.00015275	0.010341	0.011268	0.00148	-0.091
MMEL1	1-arachidonoylglycerophosphoethanolamine*	IGF1	-0.15548	9.55e-07	-0.045642	0.0002071	-0.010676	0.063287	-0.00617	0.03046
MMEL1	1-arachidonoylglycerophosphoethanolamine*	total_protein	-0.15548	9.55e-07	-0.12361	3.82e-05	0.022593	8.26e-07	0.01218	-0.10696
MMEL1	1-arachidonoylglycerophosphoethanolamine*	urate	-0.15548	9.55e-07	-0.070277	1.61e-06	-0.0082065	0.1109	-0.01491	-0.06884
MRPL14	citrate	Ca	-0.29668	5.72e-07	0.067568	6.47e-10	0.041291	2.6e-05	0.05805	0.0675
MRPL45P2	carnitine	FVC	0.20919	1.91e-08	-0.029245	2.67e-05	-0.026475	1.54e-06	-0.02734	-0.01035
NPEPPS	carnitine	FVC	-0.40847	3.34e-06	-0.029245	2.67e-05	0.046059	3.08e-06	0.04606	-0.01035
OASL	butyrylcarnitine	AST	-0.42068	5.04e-09	0.015186	0.0011923	0.0090184	0.093992	0.01975	0.00356
OASL	butyrylcarnitine	CRP	-0.42068	5.04e-09	-0.023031	1.42e-05	-0.08454	2.61e-15	-0.12359	0.05908
OASL	butyrylcarnitine	GGT	-0.42068	5.04e-09	-0.028366	8.1e-07	-0.19477	4.36e-95	-0.10329	0.07141
OASL	butyrylcarnitine	phosphate	-0.42068	5.04e-09	0.015236	0.0037412	-0.0080202	0.14071	0.01184	0.04747
OASL	butyrylcarnitine	total_protein	-0.42068	5.04e-09	-0.021519	1.03e-05	0.016465	0.0020662	0.00614	-0.011
PSRC1	cholesterol	bilirubin	-0.20115	3.75e-07	0.062003	1e-05	-0.0099054	0.075211	-0.00116	0.06908	bilirubin
PSRC1	cholesterol	diastolic_BP	-0.20115	3.75e-07	-0.045794	0.00083844	-0.0019848	0.69582	-0.00885	-0.05776	pressure
PSRC1	cholesterol	height	-0.20115	3.75e-07	-0.071722	7.88e-05	0.021021	0.0003035	0.01466	-0.05769	height
RAB11FIP5	N-acetylornithine	AST	-0.29587	2.68e-06	-0.012141	0.0027146	-0.0041589	0.5815	-0.00431	-0.04871
RAB11FIP5	N-acetylornithine	Cr	-0.29587	2.68e-06	0.060953	2.29e-51	-0.0022043	0.81676	-0.00522	0.07553
RAB11FIP5	N-acetylornithine	cystatinC	-0.29587	2.68e-06	0.039368	2.03e-22	0.0050173	0.55491	0.00516	0.04655
RAB11FIP5	N-acetylornithine	diastolic_BP	-0.29587	2.68e-06	-0.018316	6.65e-06	0.0090594	0.24379	0.00893	-0.04188
RAB11FIP5	N-acetylornithine	GGT	-0.29587	2.68e-06	-0.0159	8.39e-05	-0.013365	0.069389	-0.0136	-0.07289
RAB11FIP5	N-acetylornithine	urea	-0.29587	2.68e-06	0.012511	0.0019728	0.0099093	0.14141	0.00992	0.00324
RNASEH2A	glutaroylcarnitine	BMI	0.79327	2.74e-06	0.027096	0.00027869	0.0012892	0.94386	0.00573	0.01253
RNASEH2A	glutaroylcarnitine	Cr	0.79327	2.74e-06	0.059399	3.24e-06	0.017538	0.34074	0.01041	-0.01743
RNASEH2A	glutaroylcarnitine	diastolic_BP	0.79327	2.74e-06	0.025602	3.74e-06	0.015776	0.4261	-0.02129	0.02728
RNASEH2A	glutaroylcarnitine	total_protein	0.79327	2.74e-06	0.020308	0.0019684	-0.008565	0.67252	-0.03082	0.0323
RP1-90J20.11	3-dehydrocarnitine*	ApoA	0.10057	1.57e-06	-0.031411	0.0033871	0.0028201	0.2615	0.00762	-0.06072
RP1-90J20.11	3-dehydrocarnitine*	bilirubin	0.10057	1.57e-06	-0.050184	0.00025177	-0.0036683	0.22866	0.00019	-0.04881
RP1-90J20.11	3-dehydrocarnitine*	Cr	0.10057	1.57e-06	-0.087694	5.23e-15	-0.0012331	0.67325	0.00171	-0.03722
RP1-90J20.11	3-dehydrocarnitine*	SHBG	0.10057	1.57e-06	0.045309	0.00042547	0.00186	0.54545	0.00014	0.02944
SLC11A1	carnitine	FVC	-0.17477	2.37e-06	-0.029245	2.67e-05	0.0019931	0.74405	-0.01681	-0.01573
SLC22A4	hexanoylcarnitine	Ca	0.28158	1.84e-09	0.019072	0.0014476	-0.011544	0.032972	-0.01073	0.02139
SLC22A4	isovalerylcarnitine	Cr	0.57384	5.5e-26	-0.086672	1.58e-20	-0.037473	1.31e-11	-0.0294	-0.0065	Cr | creatinine
SLC22A4	isovalerylcarnitine	CRP	0.57384	5.5e-26	-0.028489	0.00018924	-0.012954	0.0027541	0.00076	-0.0346	CRP | C-reactive protein	20031577;16519819
SLC22A4	isovalerylcarnitine	IGF1	0.57384	5.5e-26	0.04387	0.00019353	0.032633	7.37e-07	0.00952	0.02823	IGF1 | insulin growth factor
SLC22A4	isovalerylcarnitine	phosphate	0.57384	5.5e-26	0.081268	2.33e-09	0.022735	8.22e-05	0.01309	0.01867	phosphate
SLC22A4	isovalerylcarnitine	urate	0.57384	5.5e-26	-0.079028	8.77e-09	-0.036569	3.04e-15	-0.02499	-0.02994	urate | uric acid	32150922;32062662
SLC22A4	propionylcarnitine	FVC	0.37494	2.47e-09	-0.046212	1.2e-06	-0.0070629	0.23211	-0.00057	-0.03369
SLC22A5	isovalerylcarnitine	Cr	0.16074	1.2e-06	-0.086672	1.58e-20	-0.015015	6.28e-05	-0.01936	0.01079	Cr | creatinine
SLC22A5	isovalerylcarnitine	CRP	0.16074	1.2e-06	-0.028489	0.00018924	-0.0091049	0.0075149	-0.01081	-0.03103	CRP | C-reactive protein	20031577
SLC22A5	isovalerylcarnitine	IGF1	0.16074	1.2e-06	0.04387	0.00019353	0.013542	0.00022165	0.01804	0.02765	IGF1 | insulin growth factor	30652029
SLC22A5	isovalerylcarnitine	phosphate	0.16074	1.2e-06	0.081268	2.33e-09	0.024145	4.39e-15	0.02457	0.02146	phosphate
SLC22A5	isovalerylcarnitine	urate	0.16074	1.2e-06	-0.079028	8.77e-09	-0.022301	2.87e-10	-0.0206	-0.02055	urate | uric acid	32150922;29309257
SLC6A12	betaine	ALP	-0.37379	8.22e-08	-0.048939	2.96e-06	0.0048489	0.39174	0.0112	-0.01245	ALP | alkaline phosphatase
SLC6A12	betaine	BMI	-0.37379	8.22e-08	-0.042621	0.0040244	-0.0024268	0.75566	-0.00264	-0.02716	BMI | body mass index
SLC6A12	betaine	Cr	-0.37379	8.22e-08	-0.056042	1.66e-07	0.024421	0.0014552	0.02944	-0.12041	Cr | creatinine
SLC6A12	betaine	GGT	-0.37379	8.22e-08	-0.059857	0.0025815	0.010484	0.18358	0.01041	-0.00997	GGT | gamma-glutamyl transferase
SLC6A12	betaine	height	-0.37379	8.22e-08	-0.06909	4.86e-09	-0.044582	0.00055289	-0.02941	-0.06481	height
SLC7A6	glutaroylcarnitine	BMI	-0.24354	1.45e-07	0.027096	0.00027869	-0.012595	0.017711	-0.01425	0.00502
SLC7A6	glutaroylcarnitine	Cr	-0.24354	1.45e-07	0.059399	3.24e-06	-0.035449	1.18e-09	-0.0385	-0.03115
SLC7A6	glutaroylcarnitine	diastolic_BP	-0.24354	1.45e-07	0.025602	3.74e-06	-0.018804	0.00023819	-0.02188	0.02307
SLC7A6	glutaroylcarnitine	total_protein	-0.24354	1.45e-07	0.020308	0.0019684	0.0063763	0.28758	0.00867	0.03884
SPRYD4	gamma-glutamylglutamine	urea	-0.25186	2.12e-11	-0.17513	0.0046969	0.052214	1.95e-14	0.03839	-0.05096
TBKBP1	carnitine	FVC	-0.18525	5.46e-07	-0.029245	2.67e-05	0.016984	0.00040966	0.02912	-0.01035
TMC4	1-arachidonoylglycerophosphoinositol*	albumin	0.28035	7.17e-20	-0.038234	0.0020217	-0.016367	0.0015792	-0.0095	-0.02516
TMEM254	3-methyl-2-oxovalerate	ALT	0.20292	8.02e-07	0.053857	1.65e-05	-0.0056154	0.40799	-0.00562	0.05386
TMEM258	1-arachidonoylglycerophosphocholine*	albumin	-1.0217	7.97e-81	-0.025337	0.002829	0.017362	0.076662	-0.00533	-0.02287
TMEM258	1-arachidonoylglycerophosphocholine*	ALP	-1.0217	7.97e-81	-0.11915	0.00033076	0.13875	2.91e-32	0.10753	-0.02586
TMEM258	1-arachidonoylglycerophosphocholine*	ApoA	-1.0217	7.97e-81	0.10006	4.66e-07	-0.10351	1.71e-28	-0.0893	0.01602
TMEM258	1-arachidonoylglycerophosphocholine*	bilirubin	-1.0217	7.97e-81	0.051955	1.72e-06	-0.051018	5.19e-07	-0.03139	0.02732
TMEM258	1-arachidonoylglycerophosphocholine*	Ca	-1.0217	7.97e-81	0.019796	0.0030936	-0.028265	0.0019232	-0.03307	-0.00471
TMEM258	1-arachidonoylglycerophosphocholine*	CRP	-1.0217	7.97e-81	0.029637	8.67e-05	-0.021331	0.0071595	0.0118	0.0407
TMEM258	1-arachidonoylglycerophosphocholine*	cystatinC	-1.0217	7.97e-81	0.055105	6.42e-17	-0.048476	1.53e-06	-0.03642	0.0181
TMEM258	1-arachidonoylglycerophosphocholine*	glucose	-1.0217	7.97e-81	0.046972	0.0014396	-0.055849	1.11e-14	-0.06	-0.006
TMEM258	1-arachidonoylglycerophosphocholine*	HbA1c	-1.0217	7.97e-81	0.060023	2.87e-12	-0.069078	7.62e-14	-0.02772	0.04193
TMEM258	1-arachidonoylglycerophosphocholine*	height	-1.0217	7.97e-81	0.050984	0.00042124	-0.043806	0.00022448	-0.00265	0.05308
TMEM258	1-arachidonoylglycerophosphocholine*	IGF1	-1.0217	7.97e-81	0.057321	8.85e-07	-0.056193	5.21e-16	-0.03791	0.02557
TMEM258	1-arachidonoylglycerophosphocholine*	testosterone	-1.0217	7.97e-81	0.033329	0.00014932	-0.034203	2.47e-06	-0.03689	-0.0037
TMEM258	1-arachidonoylglycerophosphocholine*	total_protein	-1.0217	7.97e-81	-0.084516	0.0018863	0.08769	1.62e-14	0.06816	-0.02031
TMEM258	1-arachidonoylglycerophosphoethanolamine*	ALT	-0.68304	1.1e-37	0.048944	0.0046426	-0.019566	0.035523	-0.00299	0.03108
TMEM258	1-arachidonoylglycerophosphoethanolamine*	ApoA	-0.68304	1.1e-37	0.12582	0.0040543	-0.10351	1.71e-28	0.05839	0.31137
TMEM258	1-arachidonoylglycerophosphoethanolamine*	CRP	-0.68304	1.1e-37	0.032269	0.00020762	-0.021331	0.0071595	0.00626	0.05203
TMEM258	1-arachidonoylglycerophosphoethanolamine*	diastolic_BP	-0.68304	1.1e-37	-0.026892	0.0013071	0.01984	0.010349	0.02107	-0.0085
TMEM258	1-arachidonoylglycerophosphoethanolamine*	heart_rate	-0.68304	1.1e-37	-0.11597	0.00015275	0.085315	9.08e-14	0.06033	-0.0421
TMEM258	1-arachidonoylglycerophosphoethanolamine*	IGF1	-0.68304	1.1e-37	-0.045642	0.0002071	-0.056193	5.21e-16	-0.07613	-0.03474
TMEM258	1-arachidonoylglycerophosphoethanolamine*	total_protein	-0.68304	1.1e-37	-0.12361	3.82e-05	0.08769	1.62e-14	0.05242	-0.06189
TMEM258	1-arachidonoylglycerophosphoethanolamine*	urate	-0.68304	1.1e-37	-0.070277	1.61e-06	0.0558	1.79e-08	0.03284	-0.04876
TMEM258	1-arachidonoylglycerophosphoinositol*	albumin	-0.51382	8.22e-18	-0.038234	0.0020217	0.017362	0.076662	-0.00125	-0.03555
TRIM4	androsteronesulfate	CRP	0.2362	1.24e-22	0.036818	0.00069299	-0.0010911	0.64214	-0.00266	0.05812
TRIM4	androsteronesulfate	FVC	0.2362	1.24e-22	-0.027536	6.38e-06	-0.0029697	0.21127	-0.00294	-0.03428
TRIM4	androsteronesulfate	height	0.2362	1.24e-22	-0.036202	0.0018764	-0.0031746	0.30838	-0.00277	0.00105
TRIM4	androsteronesulfate	testosterone	0.2362	1.24e-22	0.10153	7.3e-29	0.015313	2.72e-09	0.01295	0.06446

## Sheet: SF1g
Transcript	Metabolite	Phenotypes
SLC11A1, LRRC6, NPEPPS, CRIP3, TBKBP1, MRPL45P2	carnitine	forced vital capacity
SLC7A6, RNASEH2A, GCDH, CPT2, DPEP2, KANSL1-AS1	glutaroylcarnitine	BMI, serum creatinine, diastolic blood pressure, total proteins
FADS1, FADS2, TMEM258, MMEL1	1-arachidonoylglycerophosphoethanolamine (LPE(20:4))	ALT, apolipoprotein A, C-reactive protein, diastolic blood pressure, heart rate, IGF-1, total protein, urate
KNSTRN, DISP2, SLC22A4, SLC22A5	isovalerylcarnitine	serum creatinine, C-reactive protein, IGF-1, phosphate, urate
FADS1, FADS2, TMEM258	1-arachidonoylglycerophosphocholine (LPC(20:4))	albumin, ALP, apolipoprotein A, bilirubin, calcium, C-reactive protein, cystatin C, glucose, HbA1c, height, IGF, testosterone, total protein
FADS2, TMEM258, TMC4	1-arachidonoylglycerophosphoinositol (LPI(20:4))	albumin
MCM6, DARS, AC011893.3	1,5-anhydroglucitol (1,5-AG)	albumin, ALT, BMI, diastolic & systolic blood pressure, heart rate, phosphate, urate
GSTM1, RP1-90J20.11	3-dehydrocarnitine	apolipoprotein A, bilirubin, serum creatinine, sex hormone-binding globulin
SLC6A12, JMY	betaine	ALP, BMI, serum creatinine, GGT, height
ANKH, MRPL14	citrate	calcium
RAB11FIP5, AC092653.5	N-acetylornithine	AST, serum creatinine, cystatin C, diastolic blood pressure, GGT, urea
CRAT, APH1B	succinylcarnitine	apolipoprotein A, BMI, serum creatinine, systolic blood pressure, urate, urea
